# Supplementary material for: Using Answer Set Programming to Integrate RNA Expression with Signalling Pathway Information to Infer How Mutations Affect Ageing
Source: PLoS One. 2012 Dec 10;7(12):e50881. doi: 10.1371/journal.pone.0050881 (PMC3519537; doi:10.1371/journal.pone.0050881)
Supplement: Supplementary File S1 — All paths inferred per experiment. (XLS) [file pone.0050881.s001.xls]

## Sheet: chico All Paths
path
chico_IRS:down:c_Pi3K:down:Pk61C_dPDK1:down:Akt1_PKB:down:foxo:up:longevity:up
chico_IRS:down:c_Pi3K:down:Akt1_PKB:down:foxo:up:longevity:up
Ilp:up:InR:up:Lnk_dSH2B:up:c_Pi3K:up:Pk61C_dPDK1:up:Akt1_PKB:up:L_PRAS40:down:c_Tor_C1:up:c_Tor_C2:down:Akt1_PKB:down:L_PRAS40:up:c_Tor_C1:down:Atg1_dUCL:down:S6k:up:chico_IRS:down:c_Pi3K:down:Pk61C_dPDK1:down:Akt1_PKB:down:foxo:up:longevity:up
Ilp:up:InR:up:Lnk_dSH2B:up:c_Pi3K:up:Akt1_PKB:up:L_PRAS40:down:c_Tor_C1:up:c_Tor_C2:down:Akt1_PKB:down:L_PRAS40:up:c_Tor_C1:down:Atg1_dUCL:down:S6k:up:chico_IRS:down:c_Pi3K:down:Pk61C_dPDK1:down:Akt1_PKB:down:foxo:up:longevity:up
Ilp:up:InR:up:Lnk_dSH2B:up:c_Pi3K:up:Pk61C_dPDK1:up:Akt1_PKB:up:c_Tsc1_2:down:Rheb:up:c_Tor_C1:up:c_Tor_C2:down:Akt1_PKB:down:L_PRAS40:up:c_Tor_C1:down:Atg1_dUCL:down:S6k:up:chico_IRS:down:c_Pi3K:down:Pk61C_dPDK1:down:Akt1_PKB:down:foxo:up:longevity:up
Ilp:up:InR:up:Lnk_dSH2B:up:c_Pi3K:up:Akt1_PKB:up:c_Tsc1_2:down:Rheb:up:c_Tor_C1:up:c_Tor_C2:down:Akt1_PKB:down:L_PRAS40:up:c_Tor_C1:down:Atg1_dUCL:down:S6k:up:chico_IRS:down:c_Pi3K:down:Pk61C_dPDK1:down:Akt1_PKB:down:foxo:up:longevity:up
Ilp:up:InR:up:Lnk_dSH2B:up:c_Pi3K:up:Pk61C_dPDK1:up:Akt1_PKB:up:L_PRAS40:down:c_Tor_C1:up:c_Tor_C2:down:Akt1_PKB:down:c_Tsc1_2:up:Rheb:down:c_Tor_C1:down:Atg1_dUCL:down:S6k:up:chico_IRS:down:c_Pi3K:down:Pk61C_dPDK1:down:Akt1_PKB:down:foxo:up:longevity:up
Ilp:up:InR:up:Lnk_dSH2B:up:c_Pi3K:up:Akt1_PKB:up:L_PRAS40:down:c_Tor_C1:up:c_Tor_C2:down:Akt1_PKB:down:c_Tsc1_2:up:Rheb:down:c_Tor_C1:down:Atg1_dUCL:down:S6k:up:chico_IRS:down:c_Pi3K:down:Pk61C_dPDK1:down:Akt1_PKB:down:foxo:up:longevity:up
Ilp:up:InR:up:Lnk_dSH2B:up:c_Pi3K:up:Pk61C_dPDK1:up:Akt1_PKB:up:c_Tsc1_2:down:Rheb:up:c_Tor_C1:up:c_Tor_C2:down:Akt1_PKB:down:c_Tsc1_2:up:Rheb:down:c_Tor_C1:down:Atg1_dUCL:down:S6k:up:chico_IRS:down:c_Pi3K:down:Pk61C_dPDK1:down:Akt1_PKB:down:foxo:up:longevity:up
Ilp:up:InR:up:Lnk_dSH2B:up:c_Pi3K:up:Akt1_PKB:up:c_Tsc1_2:down:Rheb:up:c_Tor_C1:up:c_Tor_C2:down:Akt1_PKB:down:c_Tsc1_2:up:Rheb:down:c_Tor_C1:down:Atg1_dUCL:down:S6k:up:chico_IRS:down:c_Pi3K:down:Pk61C_dPDK1:down:Akt1_PKB:down:foxo:up:longevity:up
Ilp:up:InR:up:Lnk_dSH2B:up:c_Pi3K:up:Pk61C_dPDK1:up:S6k:up:chico_IRS:down:c_Pi3K:down:Pk61C_dPDK1:down:Akt1_PKB:down:foxo:up:longevity:up
Ilp:up:InR:up:Lnk_dSH2B:up:c_Pi3K:up:Pk61C_dPDK1:up:Akt1_PKB:up:L_PRAS40:down:c_Tor_C1:up:S6k:up:chico_IRS:down:c_Pi3K:down:Pk61C_dPDK1:down:Akt1_PKB:down:foxo:up:longevity:up
Ilp:up:InR:up:Lnk_dSH2B:up:c_Pi3K:up:Akt1_PKB:up:L_PRAS40:down:c_Tor_C1:up:S6k:up:chico_IRS:down:c_Pi3K:down:Pk61C_dPDK1:down:Akt1_PKB:down:foxo:up:longevity:up
Ilp:up:InR:up:Lnk_dSH2B:up:c_Pi3K:up:Pk61C_dPDK1:up:Akt1_PKB:up:c_Tsc1_2:down:Rheb:up:c_Tor_C1:up:S6k:up:chico_IRS:down:c_Pi3K:down:Pk61C_dPDK1:down:Akt1_PKB:down:foxo:up:longevity:up
Ilp:up:InR:up:Lnk_dSH2B:up:c_Pi3K:up:Akt1_PKB:up:c_Tsc1_2:down:Rheb:up:c_Tor_C1:up:S6k:up:chico_IRS:down:c_Pi3K:down:Pk61C_dPDK1:down:Akt1_PKB:down:foxo:up:longevity:up
Ilp:up:InR:up:Lnk_dSH2B:up:c_Pi3K:up:Pk61C_dPDK1:up:Akt1_PKB:up:L_PRAS40:down:c_Tor_C1:up:c_Tor_C2:down:Akt1_PKB:down:L_PRAS40:up:c_Tor_C1:down:Atg1_dUCL:down:S6k:up:chico_IRS:down:c_Pi3K:down:Akt1_PKB:down:foxo:up:longevity:up
Ilp:up:InR:up:Lnk_dSH2B:up:c_Pi3K:up:Akt1_PKB:up:L_PRAS40:down:c_Tor_C1:up:c_Tor_C2:down:Akt1_PKB:down:L_PRAS40:up:c_Tor_C1:down:Atg1_dUCL:down:S6k:up:chico_IRS:down:c_Pi3K:down:Akt1_PKB:down:foxo:up:longevity:up
Ilp:up:InR:up:Lnk_dSH2B:up:c_Pi3K:up:Pk61C_dPDK1:up:Akt1_PKB:up:c_Tsc1_2:down:Rheb:up:c_Tor_C1:up:c_Tor_C2:down:Akt1_PKB:down:L_PRAS40:up:c_Tor_C1:down:Atg1_dUCL:down:S6k:up:chico_IRS:down:c_Pi3K:down:Akt1_PKB:down:foxo:up:longevity:up
Ilp:up:InR:up:Lnk_dSH2B:up:c_Pi3K:up:Akt1_PKB:up:c_Tsc1_2:down:Rheb:up:c_Tor_C1:up:c_Tor_C2:down:Akt1_PKB:down:L_PRAS40:up:c_Tor_C1:down:Atg1_dUCL:down:S6k:up:chico_IRS:down:c_Pi3K:down:Akt1_PKB:down:foxo:up:longevity:up
Ilp:up:InR:up:Lnk_dSH2B:up:c_Pi3K:up:Pk61C_dPDK1:up:Akt1_PKB:up:L_PRAS40:down:c_Tor_C1:up:c_Tor_C2:down:Akt1_PKB:down:c_Tsc1_2:up:Rheb:down:c_Tor_C1:down:Atg1_dUCL:down:S6k:up:chico_IRS:down:c_Pi3K:down:Akt1_PKB:down:foxo:up:longevity:up
Ilp:up:InR:up:Lnk_dSH2B:up:c_Pi3K:up:Akt1_PKB:up:L_PRAS40:down:c_Tor_C1:up:c_Tor_C2:down:Akt1_PKB:down:c_Tsc1_2:up:Rheb:down:c_Tor_C1:down:Atg1_dUCL:down:S6k:up:chico_IRS:down:c_Pi3K:down:Akt1_PKB:down:foxo:up:longevity:up
Ilp:up:InR:up:Lnk_dSH2B:up:c_Pi3K:up:Pk61C_dPDK1:up:Akt1_PKB:up:c_Tsc1_2:down:Rheb:up:c_Tor_C1:up:c_Tor_C2:down:Akt1_PKB:down:c_Tsc1_2:up:Rheb:down:c_Tor_C1:down:Atg1_dUCL:down:S6k:up:chico_IRS:down:c_Pi3K:down:Akt1_PKB:down:foxo:up:longevity:up
Ilp:up:InR:up:Lnk_dSH2B:up:c_Pi3K:up:Akt1_PKB:up:c_Tsc1_2:down:Rheb:up:c_Tor_C1:up:c_Tor_C2:down:Akt1_PKB:down:c_Tsc1_2:up:Rheb:down:c_Tor_C1:down:Atg1_dUCL:down:S6k:up:chico_IRS:down:c_Pi3K:down:Akt1_PKB:down:foxo:up:longevity:up
Ilp:up:InR:up:Lnk_dSH2B:up:c_Pi3K:up:Pk61C_dPDK1:up:S6k:up:chico_IRS:down:c_Pi3K:down:Akt1_PKB:down:foxo:up:longevity:up
Ilp:up:InR:up:Lnk_dSH2B:up:c_Pi3K:up:Pk61C_dPDK1:up:Akt1_PKB:up:L_PRAS40:down:c_Tor_C1:up:S6k:up:chico_IRS:down:c_Pi3K:down:Akt1_PKB:down:foxo:up:longevity:up
Ilp:up:InR:up:Lnk_dSH2B:up:c_Pi3K:up:Akt1_PKB:up:L_PRAS40:down:c_Tor_C1:up:S6k:up:chico_IRS:down:c_Pi3K:down:Akt1_PKB:down:foxo:up:longevity:up
Ilp:up:InR:up:Lnk_dSH2B:up:c_Pi3K:up:Pk61C_dPDK1:up:Akt1_PKB:up:c_Tsc1_2:down:Rheb:up:c_Tor_C1:up:S6k:up:chico_IRS:down:c_Pi3K:down:Akt1_PKB:down:foxo:up:longevity:up
Ilp:up:InR:up:Lnk_dSH2B:up:c_Pi3K:up:Akt1_PKB:up:c_Tsc1_2:down:Rheb:up:c_Tor_C1:up:S6k:up:chico_IRS:down:c_Pi3K:down:Akt1_PKB:down:foxo:up:longevity:up
Ilp:up:InR:up:Lnk_dSH2B:up:c_Pi3K:up:Pk61C_dPDK1:up:Akt1_PKB:up:L_PRAS40:down:c_Tor_C1:up:c_Tor_C2:down:Akt1_PKB:down:foxo:up:longevity:up
Ilp:up:InR:up:Lnk_dSH2B:up:c_Pi3K:up:Akt1_PKB:up:L_PRAS40:down:c_Tor_C1:up:c_Tor_C2:down:Akt1_PKB:down:foxo:up:longevity:up
Ilp:up:InR:up:Lnk_dSH2B:up:c_Pi3K:up:Pk61C_dPDK1:up:Akt1_PKB:up:c_Tsc1_2:down:Rheb:up:c_Tor_C1:up:c_Tor_C2:down:Akt1_PKB:down:foxo:up:longevity:up
Ilp:up:InR:up:Lnk_dSH2B:up:c_Pi3K:up:Akt1_PKB:up:c_Tsc1_2:down:Rheb:up:c_Tor_C1:up:c_Tor_C2:down:Akt1_PKB:down:foxo:up:longevity:up
Ilp:up:InR:up:Lnk_dSH2B:up:c_Pi3K:up:Pk61C_dPDK1:up:Akt1_PKB:up:L_PRAS40:down:c_Tor_C1:up:c_Tor_C2:down:Akt1_PKB:down:L_PRAS40:up:c_Tor_C1:down:Atg1_dUCL:down:S6k:up:chico_IRS:down:c_Pi3K:down:Pk61C_dPDK1:down:Akt1_PKB:down:foxo:up:longevity:up
Ilp:up:InR:up:Lnk_dSH2B:up:c_Pi3K:up:Akt1_PKB:up:L_PRAS40:down:c_Tor_C1:up:c_Tor_C2:down:Akt1_PKB:down:L_PRAS40:up:c_Tor_C1:down:Atg1_dUCL:down:S6k:up:chico_IRS:down:c_Pi3K:down:Pk61C_dPDK1:down:Akt1_PKB:down:foxo:up:longevity:up
Ilp:up:InR:up:Lnk_dSH2B:up:c_Pi3K:up:Pk61C_dPDK1:up:Akt1_PKB:up:c_Tsc1_2:down:Rheb:up:c_Tor_C1:up:c_Tor_C2:down:Akt1_PKB:down:L_PRAS40:up:c_Tor_C1:down:Atg1_dUCL:down:S6k:up:chico_IRS:down:c_Pi3K:down:Pk61C_dPDK1:down:Akt1_PKB:down:foxo:up:longevity:up
Ilp:up:InR:up:Lnk_dSH2B:up:c_Pi3K:up:Akt1_PKB:up:c_Tsc1_2:down:Rheb:up:c_Tor_C1:up:c_Tor_C2:down:Akt1_PKB:down:L_PRAS40:up:c_Tor_C1:down:Atg1_dUCL:down:S6k:up:chico_IRS:down:c_Pi3K:down:Pk61C_dPDK1:down:Akt1_PKB:down:foxo:up:longevity:up
Ilp:up:InR:up:Lnk_dSH2B:up:c_Pi3K:up:Pk61C_dPDK1:up:Akt1_PKB:up:L_PRAS40:down:c_Tor_C1:up:c_Tor_C2:down:Akt1_PKB:down:c_Tsc1_2:up:Rheb:down:c_Tor_C1:down:Atg1_dUCL:down:S6k:up:chico_IRS:down:c_Pi3K:down:Pk61C_dPDK1:down:Akt1_PKB:down:foxo:up:longevity:up
Ilp:up:InR:up:Lnk_dSH2B:up:c_Pi3K:up:Akt1_PKB:up:L_PRAS40:down:c_Tor_C1:up:c_Tor_C2:down:Akt1_PKB:down:c_Tsc1_2:up:Rheb:down:c_Tor_C1:down:Atg1_dUCL:down:S6k:up:chico_IRS:down:c_Pi3K:down:Pk61C_dPDK1:down:Akt1_PKB:down:foxo:up:longevity:up
Ilp:up:InR:up:Lnk_dSH2B:up:c_Pi3K:up:Pk61C_dPDK1:up:Akt1_PKB:up:c_Tsc1_2:down:Rheb:up:c_Tor_C1:up:c_Tor_C2:down:Akt1_PKB:down:c_Tsc1_2:up:Rheb:down:c_Tor_C1:down:Atg1_dUCL:down:S6k:up:chico_IRS:down:c_Pi3K:down:Pk61C_dPDK1:down:Akt1_PKB:down:foxo:up:longevity:up
Ilp:up:InR:up:Lnk_dSH2B:up:c_Pi3K:up:Akt1_PKB:up:c_Tsc1_2:down:Rheb:up:c_Tor_C1:up:c_Tor_C2:down:Akt1_PKB:down:c_Tsc1_2:up:Rheb:down:c_Tor_C1:down:Atg1_dUCL:down:S6k:up:chico_IRS:down:c_Pi3K:down:Pk61C_dPDK1:down:Akt1_PKB:down:foxo:up:longevity:up
Ilp:up:InR:up:Lnk_dSH2B:up:c_Pi3K:up:Pk61C_dPDK1:up:S6k:up:chico_IRS:down:c_Pi3K:down:Pk61C_dPDK1:down:Akt1_PKB:down:foxo:up:longevity:up
Ilp:up:InR:up:Lnk_dSH2B:up:c_Pi3K:up:Pk61C_dPDK1:up:Akt1_PKB:up:L_PRAS40:down:c_Tor_C1:up:S6k:up:chico_IRS:down:c_Pi3K:down:Pk61C_dPDK1:down:Akt1_PKB:down:foxo:up:longevity:up
Ilp:up:InR:up:Lnk_dSH2B:up:c_Pi3K:up:Akt1_PKB:up:L_PRAS40:down:c_Tor_C1:up:S6k:up:chico_IRS:down:c_Pi3K:down:Pk61C_dPDK1:down:Akt1_PKB:down:foxo:up:longevity:up
Ilp:up:InR:up:Lnk_dSH2B:up:c_Pi3K:up:Pk61C_dPDK1:up:Akt1_PKB:up:c_Tsc1_2:down:Rheb:up:c_Tor_C1:up:S6k:up:chico_IRS:down:c_Pi3K:down:Pk61C_dPDK1:down:Akt1_PKB:down:foxo:up:longevity:up
Ilp:up:InR:up:Lnk_dSH2B:up:c_Pi3K:up:Akt1_PKB:up:c_Tsc1_2:down:Rheb:up:c_Tor_C1:up:S6k:up:chico_IRS:down:c_Pi3K:down:Pk61C_dPDK1:down:Akt1_PKB:down:foxo:up:longevity:up
Ilp:up:InR:up:Lnk_dSH2B:up:c_Pi3K:up:Pk61C_dPDK1:up:Akt1_PKB:up:L_PRAS40:down:c_Tor_C1:up:c_Tor_C2:down:Akt1_PKB:down:L_PRAS40:up:c_Tor_C1:down:Atg1_dUCL:down:S6k:up:chico_IRS:down:c_Pi3K:down:Akt1_PKB:down:foxo:up:longevity:up
Ilp:up:InR:up:Lnk_dSH2B:up:c_Pi3K:up:Akt1_PKB:up:L_PRAS40:down:c_Tor_C1:up:c_Tor_C2:down:Akt1_PKB:down:L_PRAS40:up:c_Tor_C1:down:Atg1_dUCL:down:S6k:up:chico_IRS:down:c_Pi3K:down:Akt1_PKB:down:foxo:up:longevity:up
Ilp:up:InR:up:Lnk_dSH2B:up:c_Pi3K:up:Pk61C_dPDK1:up:Akt1_PKB:up:c_Tsc1_2:down:Rheb:up:c_Tor_C1:up:c_Tor_C2:down:Akt1_PKB:down:L_PRAS40:up:c_Tor_C1:down:Atg1_dUCL:down:S6k:up:chico_IRS:down:c_Pi3K:down:Akt1_PKB:down:foxo:up:longevity:up
Ilp:up:InR:up:Lnk_dSH2B:up:c_Pi3K:up:Akt1_PKB:up:c_Tsc1_2:down:Rheb:up:c_Tor_C1:up:c_Tor_C2:down:Akt1_PKB:down:L_PRAS40:up:c_Tor_C1:down:Atg1_dUCL:down:S6k:up:chico_IRS:down:c_Pi3K:down:Akt1_PKB:down:foxo:up:longevity:up
Ilp:up:InR:up:Lnk_dSH2B:up:c_Pi3K:up:Pk61C_dPDK1:up:Akt1_PKB:up:L_PRAS40:down:c_Tor_C1:up:c_Tor_C2:down:Akt1_PKB:down:c_Tsc1_2:up:Rheb:down:c_Tor_C1:down:Atg1_dUCL:down:S6k:up:chico_IRS:down:c_Pi3K:down:Akt1_PKB:down:foxo:up:longevity:up
Ilp:up:InR:up:Lnk_dSH2B:up:c_Pi3K:up:Akt1_PKB:up:L_PRAS40:down:c_Tor_C1:up:c_Tor_C2:down:Akt1_PKB:down:c_Tsc1_2:up:Rheb:down:c_Tor_C1:down:Atg1_dUCL:down:S6k:up:chico_IRS:down:c_Pi3K:down:Akt1_PKB:down:foxo:up:longevity:up
Ilp:up:InR:up:Lnk_dSH2B:up:c_Pi3K:up:Pk61C_dPDK1:up:Akt1_PKB:up:c_Tsc1_2:down:Rheb:up:c_Tor_C1:up:c_Tor_C2:down:Akt1_PKB:down:c_Tsc1_2:up:Rheb:down:c_Tor_C1:down:Atg1_dUCL:down:S6k:up:chico_IRS:down:c_Pi3K:down:Akt1_PKB:down:foxo:up:longevity:up
Ilp:up:InR:up:Lnk_dSH2B:up:c_Pi3K:up:Akt1_PKB:up:c_Tsc1_2:down:Rheb:up:c_Tor_C1:up:c_Tor_C2:down:Akt1_PKB:down:c_Tsc1_2:up:Rheb:down:c_Tor_C1:down:Atg1_dUCL:down:S6k:up:chico_IRS:down:c_Pi3K:down:Akt1_PKB:down:foxo:up:longevity:up
Ilp:up:InR:up:Lnk_dSH2B:up:c_Pi3K:up:Pk61C_dPDK1:up:S6k:up:chico_IRS:down:c_Pi3K:down:Akt1_PKB:down:foxo:up:longevity:up
Ilp:up:InR:up:Lnk_dSH2B:up:c_Pi3K:up:Pk61C_dPDK1:up:Akt1_PKB:up:L_PRAS40:down:c_Tor_C1:up:S6k:up:chico_IRS:down:c_Pi3K:down:Akt1_PKB:down:foxo:up:longevity:up
Ilp:up:InR:up:Lnk_dSH2B:up:c_Pi3K:up:Akt1_PKB:up:L_PRAS40:down:c_Tor_C1:up:S6k:up:chico_IRS:down:c_Pi3K:down:Akt1_PKB:down:foxo:up:longevity:up
Ilp:up:InR:up:Lnk_dSH2B:up:c_Pi3K:up:Pk61C_dPDK1:up:Akt1_PKB:up:c_Tsc1_2:down:Rheb:up:c_Tor_C1:up:S6k:up:chico_IRS:down:c_Pi3K:down:Akt1_PKB:down:foxo:up:longevity:up
Ilp:up:InR:up:Lnk_dSH2B:up:c_Pi3K:up:Akt1_PKB:up:c_Tsc1_2:down:Rheb:up:c_Tor_C1:up:S6k:up:chico_IRS:down:c_Pi3K:down:Akt1_PKB:down:foxo:up:longevity:up
Ilp:up:InR:up:Lnk_dSH2B:up:c_Pi3K:up:Pk61C_dPDK1:up:Akt1_PKB:up:L_PRAS40:down:c_Tor_C1:up:c_Tor_C2:down:Akt1_PKB:down:foxo:up:longevity:up
Ilp:up:InR:up:Lnk_dSH2B:up:c_Pi3K:up:Akt1_PKB:up:L_PRAS40:down:c_Tor_C1:up:c_Tor_C2:down:Akt1_PKB:down:foxo:up:longevity:up
Ilp:up:InR:up:Lnk_dSH2B:up:c_Pi3K:up:Pk61C_dPDK1:up:Akt1_PKB:up:c_Tsc1_2:down:Rheb:up:c_Tor_C1:up:c_Tor_C2:down:Akt1_PKB:down:foxo:up:longevity:up
Ilp:up:InR:up:Lnk_dSH2B:up:c_Pi3K:up:Akt1_PKB:up:c_Tsc1_2:down:Rheb:up:c_Tor_C1:up:c_Tor_C2:down:Akt1_PKB:down:foxo:up:longevity:up
Ilp:up:InR:up:Lnk_dSH2B:up:c_Pi3K:up:Pk61C_dPDK1:up:Akt1_PKB:up:L_PRAS40:down:c_Tor_C1:up:c_Tor_C2:down:Akt1_PKB:down:L_PRAS40:up:c_Tor_C1:down:Atg1_dUCL:down:S6k:up:chico_IRS:down:c_Pi3K:down:Pk61C_dPDK1:down:Akt1_PKB:down:foxo:up:longevity:up
Ilp:up:InR:up:Lnk_dSH2B:up:c_Pi3K:up:Akt1_PKB:up:L_PRAS40:down:c_Tor_C1:up:c_Tor_C2:down:Akt1_PKB:down:L_PRAS40:up:c_Tor_C1:down:Atg1_dUCL:down:S6k:up:chico_IRS:down:c_Pi3K:down:Pk61C_dPDK1:down:Akt1_PKB:down:foxo:up:longevity:up
Ilp:up:InR:up:Lnk_dSH2B:up:c_Pi3K:up:Pk61C_dPDK1:up:Akt1_PKB:up:c_Tsc1_2:down:Rheb:up:c_Tor_C1:up:c_Tor_C2:down:Akt1_PKB:down:L_PRAS40:up:c_Tor_C1:down:Atg1_dUCL:down:S6k:up:chico_IRS:down:c_Pi3K:down:Pk61C_dPDK1:down:Akt1_PKB:down:foxo:up:longevity:up
Ilp:up:InR:up:Lnk_dSH2B:up:c_Pi3K:up:Akt1_PKB:up:c_Tsc1_2:down:Rheb:up:c_Tor_C1:up:c_Tor_C2:down:Akt1_PKB:down:L_PRAS40:up:c_Tor_C1:down:Atg1_dUCL:down:S6k:up:chico_IRS:down:c_Pi3K:down:Pk61C_dPDK1:down:Akt1_PKB:down:foxo:up:longevity:up
Ilp:up:InR:up:Lnk_dSH2B:up:c_Pi3K:up:Pk61C_dPDK1:up:Akt1_PKB:up:L_PRAS40:down:c_Tor_C1:up:c_Tor_C2:down:Akt1_PKB:down:c_Tsc1_2:up:Rheb:down:c_Tor_C1:down:Atg1_dUCL:down:S6k:up:chico_IRS:down:c_Pi3K:down:Pk61C_dPDK1:down:Akt1_PKB:down:foxo:up:longevity:up
Ilp:up:InR:up:Lnk_dSH2B:up:c_Pi3K:up:Akt1_PKB:up:L_PRAS40:down:c_Tor_C1:up:c_Tor_C2:down:Akt1_PKB:down:c_Tsc1_2:up:Rheb:down:c_Tor_C1:down:Atg1_dUCL:down:S6k:up:chico_IRS:down:c_Pi3K:down:Pk61C_dPDK1:down:Akt1_PKB:down:foxo:up:longevity:up
Ilp:up:InR:up:Lnk_dSH2B:up:c_Pi3K:up:Pk61C_dPDK1:up:Akt1_PKB:up:c_Tsc1_2:down:Rheb:up:c_Tor_C1:up:c_Tor_C2:down:Akt1_PKB:down:c_Tsc1_2:up:Rheb:down:c_Tor_C1:down:Atg1_dUCL:down:S6k:up:chico_IRS:down:c_Pi3K:down:Pk61C_dPDK1:down:Akt1_PKB:down:foxo:up:longevity:up
Ilp:up:InR:up:Lnk_dSH2B:up:c_Pi3K:up:Akt1_PKB:up:c_Tsc1_2:down:Rheb:up:c_Tor_C1:up:c_Tor_C2:down:Akt1_PKB:down:c_Tsc1_2:up:Rheb:down:c_Tor_C1:down:Atg1_dUCL:down:S6k:up:chico_IRS:down:c_Pi3K:down:Pk61C_dPDK1:down:Akt1_PKB:down:foxo:up:longevity:up
Ilp:up:InR:up:Lnk_dSH2B:up:c_Pi3K:up:Pk61C_dPDK1:up:S6k:up:chico_IRS:down:c_Pi3K:down:Pk61C_dPDK1:down:Akt1_PKB:down:foxo:up:longevity:up
Ilp:up:InR:up:Lnk_dSH2B:up:c_Pi3K:up:Pk61C_dPDK1:up:Akt1_PKB:up:L_PRAS40:down:c_Tor_C1:up:S6k:up:chico_IRS:down:c_Pi3K:down:Pk61C_dPDK1:down:Akt1_PKB:down:foxo:up:longevity:up
Ilp:up:InR:up:Lnk_dSH2B:up:c_Pi3K:up:Akt1_PKB:up:L_PRAS40:down:c_Tor_C1:up:S6k:up:chico_IRS:down:c_Pi3K:down:Pk61C_dPDK1:down:Akt1_PKB:down:foxo:up:longevity:up
Ilp:up:InR:up:Lnk_dSH2B:up:c_Pi3K:up:Pk61C_dPDK1:up:Akt1_PKB:up:c_Tsc1_2:down:Rheb:up:c_Tor_C1:up:S6k:up:chico_IRS:down:c_Pi3K:down:Pk61C_dPDK1:down:Akt1_PKB:down:foxo:up:longevity:up
Ilp:up:InR:up:Lnk_dSH2B:up:c_Pi3K:up:Akt1_PKB:up:c_Tsc1_2:down:Rheb:up:c_Tor_C1:up:S6k:up:chico_IRS:down:c_Pi3K:down:Pk61C_dPDK1:down:Akt1_PKB:down:foxo:up:longevity:up
Ilp:up:InR:up:Lnk_dSH2B:up:c_Pi3K:up:Pk61C_dPDK1:up:Akt1_PKB:up:L_PRAS40:down:c_Tor_C1:up:c_Tor_C2:down:Akt1_PKB:down:L_PRAS40:up:c_Tor_C1:down:Atg1_dUCL:down:S6k:up:chico_IRS:down:c_Pi3K:down:Akt1_PKB:down:foxo:up:longevity:up
Ilp:up:InR:up:Lnk_dSH2B:up:c_Pi3K:up:Akt1_PKB:up:L_PRAS40:down:c_Tor_C1:up:c_Tor_C2:down:Akt1_PKB:down:L_PRAS40:up:c_Tor_C1:down:Atg1_dUCL:down:S6k:up:chico_IRS:down:c_Pi3K:down:Akt1_PKB:down:foxo:up:longevity:up
Ilp:up:InR:up:Lnk_dSH2B:up:c_Pi3K:up:Pk61C_dPDK1:up:Akt1_PKB:up:c_Tsc1_2:down:Rheb:up:c_Tor_C1:up:c_Tor_C2:down:Akt1_PKB:down:L_PRAS40:up:c_Tor_C1:down:Atg1_dUCL:down:S6k:up:chico_IRS:down:c_Pi3K:down:Akt1_PKB:down:foxo:up:longevity:up
Ilp:up:InR:up:Lnk_dSH2B:up:c_Pi3K:up:Akt1_PKB:up:c_Tsc1_2:down:Rheb:up:c_Tor_C1:up:c_Tor_C2:down:Akt1_PKB:down:L_PRAS40:up:c_Tor_C1:down:Atg1_dUCL:down:S6k:up:chico_IRS:down:c_Pi3K:down:Akt1_PKB:down:foxo:up:longevity:up
Ilp:up:InR:up:Lnk_dSH2B:up:c_Pi3K:up:Pk61C_dPDK1:up:Akt1_PKB:up:L_PRAS40:down:c_Tor_C1:up:c_Tor_C2:down:Akt1_PKB:down:c_Tsc1_2:up:Rheb:down:c_Tor_C1:down:Atg1_dUCL:down:S6k:up:chico_IRS:down:c_Pi3K:down:Akt1_PKB:down:foxo:up:longevity:up
Ilp:up:InR:up:Lnk_dSH2B:up:c_Pi3K:up:Akt1_PKB:up:L_PRAS40:down:c_Tor_C1:up:c_Tor_C2:down:Akt1_PKB:down:c_Tsc1_2:up:Rheb:down:c_Tor_C1:down:Atg1_dUCL:down:S6k:up:chico_IRS:down:c_Pi3K:down:Akt1_PKB:down:foxo:up:longevity:up
Ilp:up:InR:up:Lnk_dSH2B:up:c_Pi3K:up:Pk61C_dPDK1:up:Akt1_PKB:up:c_Tsc1_2:down:Rheb:up:c_Tor_C1:up:c_Tor_C2:down:Akt1_PKB:down:c_Tsc1_2:up:Rheb:down:c_Tor_C1:down:Atg1_dUCL:down:S6k:up:chico_IRS:down:c_Pi3K:down:Akt1_PKB:down:foxo:up:longevity:up
Ilp:up:InR:up:Lnk_dSH2B:up:c_Pi3K:up:Akt1_PKB:up:c_Tsc1_2:down:Rheb:up:c_Tor_C1:up:c_Tor_C2:down:Akt1_PKB:down:c_Tsc1_2:up:Rheb:down:c_Tor_C1:down:Atg1_dUCL:down:S6k:up:chico_IRS:down:c_Pi3K:down:Akt1_PKB:down:foxo:up:longevity:up
Ilp:up:InR:up:Lnk_dSH2B:up:c_Pi3K:up:Pk61C_dPDK1:up:S6k:up:chico_IRS:down:c_Pi3K:down:Akt1_PKB:down:foxo:up:longevity:up
Ilp:up:InR:up:Lnk_dSH2B:up:c_Pi3K:up:Pk61C_dPDK1:up:Akt1_PKB:up:L_PRAS40:down:c_Tor_C1:up:S6k:up:chico_IRS:down:c_Pi3K:down:Akt1_PKB:down:foxo:up:longevity:up
Ilp:up:InR:up:Lnk_dSH2B:up:c_Pi3K:up:Akt1_PKB:up:L_PRAS40:down:c_Tor_C1:up:S6k:up:chico_IRS:down:c_Pi3K:down:Akt1_PKB:down:foxo:up:longevity:up
Ilp:up:InR:up:Lnk_dSH2B:up:c_Pi3K:up:Pk61C_dPDK1:up:Akt1_PKB:up:c_Tsc1_2:down:Rheb:up:c_Tor_C1:up:S6k:up:chico_IRS:down:c_Pi3K:down:Akt1_PKB:down:foxo:up:longevity:up
Ilp:up:InR:up:Lnk_dSH2B:up:c_Pi3K:up:Akt1_PKB:up:c_Tsc1_2:down:Rheb:up:c_Tor_C1:up:S6k:up:chico_IRS:down:c_Pi3K:down:Akt1_PKB:down:foxo:up:longevity:up
Ilp:up:InR:up:Lnk_dSH2B:up:c_Pi3K:up:Pk61C_dPDK1:up:Akt1_PKB:up:L_PRAS40:down:c_Tor_C1:up:c_Tor_C2:down:Akt1_PKB:down:foxo:up:longevity:up
Ilp:up:InR:up:Lnk_dSH2B:up:c_Pi3K:up:Akt1_PKB:up:L_PRAS40:down:c_Tor_C1:up:c_Tor_C2:down:Akt1_PKB:down:foxo:up:longevity:up
Ilp:up:InR:up:Lnk_dSH2B:up:c_Pi3K:up:Pk61C_dPDK1:up:Akt1_PKB:up:c_Tsc1_2:down:Rheb:up:c_Tor_C1:up:c_Tor_C2:down:Akt1_PKB:down:foxo:up:longevity:up
Ilp:up:InR:up:Lnk_dSH2B:up:c_Pi3K:up:Akt1_PKB:up:c_Tsc1_2:down:Rheb:up:c_Tor_C1:up:c_Tor_C2:down:Akt1_PKB:down:foxo:up:longevity:up
chico_IRS:down:c_Pi3K:down:Pk61C_dPDK1:down:Akt1_PKB:down:L_PRAS40:up:c_Tor_C1:down:c_Tor_C2:up:Akt1_PKB:up:foxo:down:longevity:down
chico_IRS:down:c_Pi3K:down:Akt1_PKB:down:L_PRAS40:up:c_Tor_C1:down:c_Tor_C2:up:Akt1_PKB:up:foxo:down:longevity:down
chico_IRS:down:c_Pi3K:down:Pk61C_dPDK1:down:Akt1_PKB:down:c_Tsc1_2:up:Rheb:down:c_Tor_C1:down:c_Tor_C2:up:Akt1_PKB:up:foxo:down:longevity:down
chico_IRS:down:c_Pi3K:down:Akt1_PKB:down:c_Tsc1_2:up:Rheb:down:c_Tor_C1:down:c_Tor_C2:up:Akt1_PKB:up:foxo:down:longevity:down
Ilp:up:InR:up:Lnk_dSH2B:up:c_Pi3K:up:Pk61C_dPDK1:up:Akt1_PKB:up:foxo:down:longevity:down
Ilp:up:InR:up:Lnk_dSH2B:up:c_Pi3K:up:Akt1_PKB:up:foxo:down:longevity:down
Ilp:up:InR:up:Lnk_dSH2B:up:c_Pi3K:up:Pk61C_dPDK1:up:S6k:up:chico_IRS:down:c_Pi3K:down:Pk61C_dPDK1:down:Akt1_PKB:down:L_PRAS40:up:c_Tor_C1:down:c_Tor_C2:up:Akt1_PKB:up:foxo:down:longevity:down
Ilp:up:InR:up:Lnk_dSH2B:up:c_Pi3K:up:Pk61C_dPDK1:up:S6k:up:chico_IRS:down:c_Pi3K:down:Akt1_PKB:down:L_PRAS40:up:c_Tor_C1:down:c_Tor_C2:up:Akt1_PKB:up:foxo:down:longevity:down
Ilp:up:InR:up:Lnk_dSH2B:up:c_Pi3K:up:Pk61C_dPDK1:up:S6k:up:chico_IRS:down:c_Pi3K:down:Pk61C_dPDK1:down:Akt1_PKB:down:c_Tsc1_2:up:Rheb:down:c_Tor_C1:down:c_Tor_C2:up:Akt1_PKB:up:foxo:down:longevity:down
Ilp:up:InR:up:Lnk_dSH2B:up:c_Pi3K:up:Pk61C_dPDK1:up:S6k:up:chico_IRS:down:c_Pi3K:down:Akt1_PKB:down:c_Tsc1_2:up:Rheb:down:c_Tor_C1:down:c_Tor_C2:up:Akt1_PKB:up:foxo:down:longevity:down
Ilp:up:InR:up:Lnk_dSH2B:up:c_Pi3K:up:Pk61C_dPDK1:up:Akt1_PKB:up:foxo:down:longevity:down
Ilp:up:InR:up:Lnk_dSH2B:up:c_Pi3K:up:Akt1_PKB:up:foxo:down:longevity:down
Ilp:up:InR:up:Lnk_dSH2B:up:c_Pi3K:up:Pk61C_dPDK1:up:S6k:up:chico_IRS:down:c_Pi3K:down:Pk61C_dPDK1:down:Akt1_PKB:down:L_PRAS40:up:c_Tor_C1:down:c_Tor_C2:up:Akt1_PKB:up:foxo:down:longevity:down
Ilp:up:InR:up:Lnk_dSH2B:up:c_Pi3K:up:Pk61C_dPDK1:up:S6k:up:chico_IRS:down:c_Pi3K:down:Akt1_PKB:down:L_PRAS40:up:c_Tor_C1:down:c_Tor_C2:up:Akt1_PKB:up:foxo:down:longevity:down
Ilp:up:InR:up:Lnk_dSH2B:up:c_Pi3K:up:Pk61C_dPDK1:up:S6k:up:chico_IRS:down:c_Pi3K:down:Pk61C_dPDK1:down:Akt1_PKB:down:c_Tsc1_2:up:Rheb:down:c_Tor_C1:down:c_Tor_C2:up:Akt1_PKB:up:foxo:down:longevity:down
Ilp:up:InR:up:Lnk_dSH2B:up:c_Pi3K:up:Pk61C_dPDK1:up:S6k:up:chico_IRS:down:c_Pi3K:down:Akt1_PKB:down:c_Tsc1_2:up:Rheb:down:c_Tor_C1:down:c_Tor_C2:up:Akt1_PKB:up:foxo:down:longevity:down
Ilp:up:InR:up:Lnk_dSH2B:up:c_Pi3K:up:Pk61C_dPDK1:up:Akt1_PKB:up:foxo:down:longevity:down
Ilp:up:InR:up:Lnk_dSH2B:up:c_Pi3K:up:Akt1_PKB:up:foxo:down:longevity:down
Ilp:up:InR:up:Lnk_dSH2B:up:c_Pi3K:up:Pk61C_dPDK1:up:S6k:up:chico_IRS:down:c_Pi3K:down:Pk61C_dPDK1:down:Akt1_PKB:down:L_PRAS40:up:c_Tor_C1:down:c_Tor_C2:up:Akt1_PKB:up:foxo:down:longevity:down
Ilp:up:InR:up:Lnk_dSH2B:up:c_Pi3K:up:Pk61C_dPDK1:up:S6k:up:chico_IRS:down:c_Pi3K:down:Akt1_PKB:down:L_PRAS40:up:c_Tor_C1:down:c_Tor_C2:up:Akt1_PKB:up:foxo:down:longevity:down
Ilp:up:InR:up:Lnk_dSH2B:up:c_Pi3K:up:Pk61C_dPDK1:up:S6k:up:chico_IRS:down:c_Pi3K:down:Pk61C_dPDK1:down:Akt1_PKB:down:c_Tsc1_2:up:Rheb:down:c_Tor_C1:down:c_Tor_C2:up:Akt1_PKB:up:foxo:down:longevity:down
Ilp:up:InR:up:Lnk_dSH2B:up:c_Pi3K:up:Pk61C_dPDK1:up:S6k:up:chico_IRS:down:c_Pi3K:down:Akt1_PKB:down:c_Tsc1_2:up:Rheb:down:c_Tor_C1:down:c_Tor_C2:up:Akt1_PKB:up:foxo:down:longevity:down

## Sheet: Lnk All Paths
path
Atg1_dUCL:up:S6k:down:chico_IRS:up:c_Pi3K:up:Pk61C_dPDK1:up:Akt1_PKB:up:L_PRAS40:down:c_Tor_C1:up:c_Tor_C2:down:Akt1_PKB:down:foxo:up:longevity:up
Atg1_dUCL:up:S6k:down:chico_IRS:up:c_Pi3K:up:Akt1_PKB:up:L_PRAS40:down:c_Tor_C1:up:c_Tor_C2:down:Akt1_PKB:down:foxo:up:longevity:up
Atg1_dUCL:up:S6k:down:chico_IRS:up:c_Pi3K:up:Pk61C_dPDK1:up:Akt1_PKB:up:c_Tsc1_2:down:Rheb:up:c_Tor_C1:up:c_Tor_C2:down:Akt1_PKB:down:foxo:up:longevity:up
Atg1_dUCL:up:S6k:down:chico_IRS:up:c_Pi3K:up:Akt1_PKB:up:c_Tsc1_2:down:Rheb:up:c_Tor_C1:up:c_Tor_C2:down:Akt1_PKB:down:foxo:up:longevity:up
chico_IRS:up:c_Pi3K:up:Pk61C_dPDK1:up:Akt1_PKB:up:L_PRAS40:down:c_Tor_C1:up:c_Tor_C2:down:Akt1_PKB:down:foxo:up:longevity:up
chico_IRS:up:c_Pi3K:up:Akt1_PKB:up:L_PRAS40:down:c_Tor_C1:up:c_Tor_C2:down:Akt1_PKB:down:foxo:up:longevity:up
chico_IRS:up:c_Pi3K:up:Pk61C_dPDK1:up:Akt1_PKB:up:c_Tsc1_2:down:Rheb:up:c_Tor_C1:up:c_Tor_C2:down:Akt1_PKB:down:foxo:up:longevity:up
chico_IRS:up:c_Pi3K:up:Akt1_PKB:up:c_Tsc1_2:down:Rheb:up:c_Tor_C1:up:c_Tor_C2:down:Akt1_PKB:down:foxo:up:longevity:up
Ilp:up:InR:up:chico_IRS:up:c_Pi3K:up:Pk61C_dPDK1:up:Akt1_PKB:up:L_PRAS40:down:c_Tor_C1:up:c_Tor_C2:down:Akt1_PKB:down:foxo:up:longevity:up
Ilp:up:InR:up:chico_IRS:up:c_Pi3K:up:Akt1_PKB:up:L_PRAS40:down:c_Tor_C1:up:c_Tor_C2:down:Akt1_PKB:down:foxo:up:longevity:up
Ilp:up:InR:up:chico_IRS:up:c_Pi3K:up:Pk61C_dPDK1:up:Akt1_PKB:up:c_Tsc1_2:down:Rheb:up:c_Tor_C1:up:c_Tor_C2:down:Akt1_PKB:down:foxo:up:longevity:up
Ilp:up:InR:up:chico_IRS:up:c_Pi3K:up:Akt1_PKB:up:c_Tsc1_2:down:Rheb:up:c_Tor_C1:up:c_Tor_C2:down:Akt1_PKB:down:foxo:up:longevity:up
Ilp:up:InR:up:chico_IRS:up:c_Pi3K:up:Pk61C_dPDK1:up:Akt1_PKB:up:L_PRAS40:down:c_Tor_C1:up:c_Tor_C2:down:Akt1_PKB:down:foxo:up:longevity:up
Ilp:up:InR:up:chico_IRS:up:c_Pi3K:up:Akt1_PKB:up:L_PRAS40:down:c_Tor_C1:up:c_Tor_C2:down:Akt1_PKB:down:foxo:up:longevity:up
Ilp:up:InR:up:chico_IRS:up:c_Pi3K:up:Pk61C_dPDK1:up:Akt1_PKB:up:c_Tsc1_2:down:Rheb:up:c_Tor_C1:up:c_Tor_C2:down:Akt1_PKB:down:foxo:up:longevity:up
Ilp:up:InR:up:chico_IRS:up:c_Pi3K:up:Akt1_PKB:up:c_Tsc1_2:down:Rheb:up:c_Tor_C1:up:c_Tor_C2:down:Akt1_PKB:down:foxo:up:longevity:up
Ilp:up:InR:up:chico_IRS:up:c_Pi3K:up:Pk61C_dPDK1:up:Akt1_PKB:up:L_PRAS40:down:c_Tor_C1:up:c_Tor_C2:down:Akt1_PKB:down:foxo:up:longevity:up
Ilp:up:InR:up:chico_IRS:up:c_Pi3K:up:Akt1_PKB:up:L_PRAS40:down:c_Tor_C1:up:c_Tor_C2:down:Akt1_PKB:down:foxo:up:longevity:up
Ilp:up:InR:up:chico_IRS:up:c_Pi3K:up:Pk61C_dPDK1:up:Akt1_PKB:up:c_Tsc1_2:down:Rheb:up:c_Tor_C1:up:c_Tor_C2:down:Akt1_PKB:down:foxo:up:longevity:up
Ilp:up:InR:up:chico_IRS:up:c_Pi3K:up:Akt1_PKB:up:c_Tsc1_2:down:Rheb:up:c_Tor_C1:up:c_Tor_C2:down:Akt1_PKB:down:foxo:up:longevity:up
Ilp:up:InR:up:chico_IRS:up:c_Pi3K:up:Pk61C_dPDK1:up:Akt1_PKB:up:L_PRAS40:down:c_Tor_C1:up:c_Tor_C2:down:Akt1_PKB:down:foxo:up:longevity:up
Ilp:up:InR:up:chico_IRS:up:c_Pi3K:up:Akt1_PKB:up:L_PRAS40:down:c_Tor_C1:up:c_Tor_C2:down:Akt1_PKB:down:foxo:up:longevity:up
Ilp:up:InR:up:chico_IRS:up:c_Pi3K:up:Pk61C_dPDK1:up:Akt1_PKB:up:c_Tsc1_2:down:Rheb:up:c_Tor_C1:up:c_Tor_C2:down:Akt1_PKB:down:foxo:up:longevity:up
Ilp:up:InR:up:chico_IRS:up:c_Pi3K:up:Akt1_PKB:up:c_Tsc1_2:down:Rheb:up:c_Tor_C1:up:c_Tor_C2:down:Akt1_PKB:down:foxo:up:longevity:up
ImpL2:down:Ilp:up:InR:up:chico_IRS:up:c_Pi3K:up:Pk61C_dPDK1:up:Akt1_PKB:up:L_PRAS40:down:c_Tor_C1:up:c_Tor_C2:down:Akt1_PKB:down:foxo:up:longevity:up
ImpL2:down:Ilp:up:InR:up:chico_IRS:up:c_Pi3K:up:Pk61C_dPDK1:up:Akt1_PKB:up:L_PRAS40:down:c_Tor_C1:up:c_Tor_C2:down:Akt1_PKB:down:foxo:up:longevity:up
ImpL2:down:Ilp:up:InR:up:chico_IRS:up:c_Pi3K:up:Akt1_PKB:up:L_PRAS40:down:c_Tor_C1:up:c_Tor_C2:down:Akt1_PKB:down:foxo:up:longevity:up
ImpL2:down:Ilp:up:InR:up:chico_IRS:up:c_Pi3K:up:Akt1_PKB:up:L_PRAS40:down:c_Tor_C1:up:c_Tor_C2:down:Akt1_PKB:down:foxo:up:longevity:up
ImpL2:down:Ilp:up:InR:up:chico_IRS:up:c_Pi3K:up:Pk61C_dPDK1:up:Akt1_PKB:up:c_Tsc1_2:down:Rheb:up:c_Tor_C1:up:c_Tor_C2:down:Akt1_PKB:down:foxo:up:longevity:up
ImpL2:down:Ilp:up:InR:up:chico_IRS:up:c_Pi3K:up:Pk61C_dPDK1:up:Akt1_PKB:up:c_Tsc1_2:down:Rheb:up:c_Tor_C1:up:c_Tor_C2:down:Akt1_PKB:down:foxo:up:longevity:up
ImpL2:down:Ilp:up:InR:up:chico_IRS:up:c_Pi3K:up:Akt1_PKB:up:c_Tsc1_2:down:Rheb:up:c_Tor_C1:up:c_Tor_C2:down:Akt1_PKB:down:foxo:up:longevity:up
ImpL2:down:Ilp:up:InR:up:chico_IRS:up:c_Pi3K:up:Akt1_PKB:up:c_Tsc1_2:down:Rheb:up:c_Tor_C1:up:c_Tor_C2:down:Akt1_PKB:down:foxo:up:longevity:up
Lnk_dSH2B:down:c_Pi3K:down:Pk61C_dPDK1:down:Akt1_PKB:down:foxo:up:longevity:up
Lnk_dSH2B:down:c_Pi3K:down:Akt1_PKB:down:foxo:up:longevity:up
Lnk_dSH2B:down:c_Pi3K:down:Pk61C_dPDK1:down:S6k:down:chico_IRS:up:c_Pi3K:up:Pk61C_dPDK1:up:Akt1_PKB:up:L_PRAS40:down:c_Tor_C1:up:c_Tor_C2:down:Akt1_PKB:down:foxo:up:longevity:up
Lnk_dSH2B:down:c_Pi3K:down:Pk61C_dPDK1:down:S6k:down:chico_IRS:up:c_Pi3K:up:Akt1_PKB:up:L_PRAS40:down:c_Tor_C1:up:c_Tor_C2:down:Akt1_PKB:down:foxo:up:longevity:up
Lnk_dSH2B:down:c_Pi3K:down:Pk61C_dPDK1:down:S6k:down:chico_IRS:up:c_Pi3K:up:Pk61C_dPDK1:up:Akt1_PKB:up:c_Tsc1_2:down:Rheb:up:c_Tor_C1:up:c_Tor_C2:down:Akt1_PKB:down:foxo:up:longevity:up
Lnk_dSH2B:down:c_Pi3K:down:Pk61C_dPDK1:down:S6k:down:chico_IRS:up:c_Pi3K:up:Akt1_PKB:up:c_Tsc1_2:down:Rheb:up:c_Tor_C1:up:c_Tor_C2:down:Akt1_PKB:down:foxo:up:longevity:up
wdb_PP2A:down:Akt1_PKB:up:c_Tsc1_2:down:Rheb:up:c_Tor_C1:up:Atg1_dUCL:up:S6k:down:chico_IRS:up:c_Pi3K:up:Pk61C_dPDK1:up:Akt1_PKB:up:L_PRAS40:down:c_Tor_C1:up:c_Tor_C2:down:Akt1_PKB:down:foxo:up:longevity:up
wdb_PP2A:down:Akt1_PKB:up:c_Tsc1_2:down:Rheb:up:c_Tor_C1:up:Atg1_dUCL:up:S6k:down:chico_IRS:up:c_Pi3K:up:Akt1_PKB:up:L_PRAS40:down:c_Tor_C1:up:c_Tor_C2:down:Akt1_PKB:down:foxo:up:longevity:up
wdb_PP2A:down:Akt1_PKB:up:L_PRAS40:down:c_Tor_C1:up:c_Tor_C2:down:Akt1_PKB:down:foxo:up:longevity:up
wdb_PP2A:down:Akt1_PKB:up:c_Tsc1_2:down:Rheb:up:c_Tor_C1:up:c_Tor_C2:down:Akt1_PKB:down:foxo:up:longevity:up
Atg1_dUCL:up:S6k:down:chico_IRS:up:c_Pi3K:up:Pk61C_dPDK1:up:Akt1_PKB:up:foxo:down:longevity:down
Atg1_dUCL:up:S6k:down:chico_IRS:up:c_Pi3K:up:Akt1_PKB:up:foxo:down:longevity:down
chico_IRS:up:c_Pi3K:up:Pk61C_dPDK1:up:Akt1_PKB:up:foxo:down:longevity:down
chico_IRS:up:c_Pi3K:up:Akt1_PKB:up:foxo:down:longevity:down
Ilp:up:InR:up:chico_IRS:up:c_Pi3K:up:Pk61C_dPDK1:up:Akt1_PKB:up:foxo:down:longevity:down
Ilp:up:InR:up:chico_IRS:up:c_Pi3K:up:Akt1_PKB:up:foxo:down:longevity:down
Ilp:up:InR:up:chico_IRS:up:c_Pi3K:up:Pk61C_dPDK1:up:Akt1_PKB:up:foxo:down:longevity:down
Ilp:up:InR:up:chico_IRS:up:c_Pi3K:up:Akt1_PKB:up:foxo:down:longevity:down
Ilp:up:InR:up:chico_IRS:up:c_Pi3K:up:Pk61C_dPDK1:up:Akt1_PKB:up:foxo:down:longevity:down
Ilp:up:InR:up:chico_IRS:up:c_Pi3K:up:Akt1_PKB:up:foxo:down:longevity:down
Ilp:up:InR:up:chico_IRS:up:c_Pi3K:up:Pk61C_dPDK1:up:Akt1_PKB:up:foxo:down:longevity:down
Ilp:up:InR:up:chico_IRS:up:c_Pi3K:up:Akt1_PKB:up:foxo:down:longevity:down
ImpL2:down:Ilp:up:InR:up:chico_IRS:up:c_Pi3K:up:Pk61C_dPDK1:up:Akt1_PKB:up:foxo:down:longevity:down
ImpL2:down:Ilp:up:InR:up:chico_IRS:up:c_Pi3K:up:Pk61C_dPDK1:up:Akt1_PKB:up:foxo:down:longevity:down
ImpL2:down:Ilp:up:InR:up:chico_IRS:up:c_Pi3K:up:Akt1_PKB:up:foxo:down:longevity:down
ImpL2:down:Ilp:up:InR:up:chico_IRS:up:c_Pi3K:up:Akt1_PKB:up:foxo:down:longevity:down
Lnk_dSH2B:down:c_Pi3K:down:Pk61C_dPDK1:down:Akt1_PKB:down:L_PRAS40:up:c_Tor_C1:down:c_Tor_C2:up:Akt1_PKB:up:L_PRAS40:down:c_Tor_C1:up:Atg1_dUCL:up:S6k:down:chico_IRS:up:c_Pi3K:up:Pk61C_dPDK1:up:Akt1_PKB:up:foxo:down:longevity:down
Lnk_dSH2B:down:c_Pi3K:down:Akt1_PKB:down:L_PRAS40:up:c_Tor_C1:down:c_Tor_C2:up:Akt1_PKB:up:L_PRAS40:down:c_Tor_C1:up:Atg1_dUCL:up:S6k:down:chico_IRS:up:c_Pi3K:up:Pk61C_dPDK1:up:Akt1_PKB:up:foxo:down:longevity:down
Lnk_dSH2B:down:c_Pi3K:down:Pk61C_dPDK1:down:Akt1_PKB:down:c_Tsc1_2:up:Rheb:down:c_Tor_C1:down:c_Tor_C2:up:Akt1_PKB:up:L_PRAS40:down:c_Tor_C1:up:Atg1_dUCL:up:S6k:down:chico_IRS:up:c_Pi3K:up:Pk61C_dPDK1:up:Akt1_PKB:up:foxo:down:longevity:down
Lnk_dSH2B:down:c_Pi3K:down:Akt1_PKB:down:c_Tsc1_2:up:Rheb:down:c_Tor_C1:down:c_Tor_C2:up:Akt1_PKB:up:L_PRAS40:down:c_Tor_C1:up:Atg1_dUCL:up:S6k:down:chico_IRS:up:c_Pi3K:up:Pk61C_dPDK1:up:Akt1_PKB:up:foxo:down:longevity:down
Lnk_dSH2B:down:c_Pi3K:down:Pk61C_dPDK1:down:Akt1_PKB:down:L_PRAS40:up:c_Tor_C1:down:c_Tor_C2:up:Akt1_PKB:up:c_Tsc1_2:down:Rheb:up:c_Tor_C1:up:Atg1_dUCL:up:S6k:down:chico_IRS:up:c_Pi3K:up:Pk61C_dPDK1:up:Akt1_PKB:up:foxo:down:longevity:down
Lnk_dSH2B:down:c_Pi3K:down:Akt1_PKB:down:L_PRAS40:up:c_Tor_C1:down:c_Tor_C2:up:Akt1_PKB:up:c_Tsc1_2:down:Rheb:up:c_Tor_C1:up:Atg1_dUCL:up:S6k:down:chico_IRS:up:c_Pi3K:up:Pk61C_dPDK1:up:Akt1_PKB:up:foxo:down:longevity:down
Lnk_dSH2B:down:c_Pi3K:down:Pk61C_dPDK1:down:Akt1_PKB:down:c_Tsc1_2:up:Rheb:down:c_Tor_C1:down:c_Tor_C2:up:Akt1_PKB:up:c_Tsc1_2:down:Rheb:up:c_Tor_C1:up:Atg1_dUCL:up:S6k:down:chico_IRS:up:c_Pi3K:up:Pk61C_dPDK1:up:Akt1_PKB:up:foxo:down:longevity:down
Lnk_dSH2B:down:c_Pi3K:down:Akt1_PKB:down:c_Tsc1_2:up:Rheb:down:c_Tor_C1:down:c_Tor_C2:up:Akt1_PKB:up:c_Tsc1_2:down:Rheb:up:c_Tor_C1:up:Atg1_dUCL:up:S6k:down:chico_IRS:up:c_Pi3K:up:Pk61C_dPDK1:up:Akt1_PKB:up:foxo:down:longevity:down
Lnk_dSH2B:down:c_Pi3K:down:Pk61C_dPDK1:down:S6k:down:chico_IRS:up:c_Pi3K:up:Pk61C_dPDK1:up:Akt1_PKB:up:foxo:down:longevity:down
Lnk_dSH2B:down:c_Pi3K:down:Pk61C_dPDK1:down:Akt1_PKB:down:L_PRAS40:up:c_Tor_C1:down:S6k:down:chico_IRS:up:c_Pi3K:up:Pk61C_dPDK1:up:Akt1_PKB:up:foxo:down:longevity:down
Lnk_dSH2B:down:c_Pi3K:down:Akt1_PKB:down:L_PRAS40:up:c_Tor_C1:down:S6k:down:chico_IRS:up:c_Pi3K:up:Pk61C_dPDK1:up:Akt1_PKB:up:foxo:down:longevity:down
Lnk_dSH2B:down:c_Pi3K:down:Pk61C_dPDK1:down:Akt1_PKB:down:c_Tsc1_2:up:Rheb:down:c_Tor_C1:down:S6k:down:chico_IRS:up:c_Pi3K:up:Pk61C_dPDK1:up:Akt1_PKB:up:foxo:down:longevity:down
Lnk_dSH2B:down:c_Pi3K:down:Akt1_PKB:down:c_Tsc1_2:up:Rheb:down:c_Tor_C1:down:S6k:down:chico_IRS:up:c_Pi3K:up:Pk61C_dPDK1:up:Akt1_PKB:up:foxo:down:longevity:down
Lnk_dSH2B:down:c_Pi3K:down:Pk61C_dPDK1:down:Akt1_PKB:down:L_PRAS40:up:c_Tor_C1:down:c_Tor_C2:up:Akt1_PKB:up:L_PRAS40:down:c_Tor_C1:up:Atg1_dUCL:up:S6k:down:chico_IRS:up:c_Pi3K:up:Akt1_PKB:up:foxo:down:longevity:down
Lnk_dSH2B:down:c_Pi3K:down:Akt1_PKB:down:L_PRAS40:up:c_Tor_C1:down:c_Tor_C2:up:Akt1_PKB:up:L_PRAS40:down:c_Tor_C1:up:Atg1_dUCL:up:S6k:down:chico_IRS:up:c_Pi3K:up:Akt1_PKB:up:foxo:down:longevity:down
Lnk_dSH2B:down:c_Pi3K:down:Pk61C_dPDK1:down:Akt1_PKB:down:c_Tsc1_2:up:Rheb:down:c_Tor_C1:down:c_Tor_C2:up:Akt1_PKB:up:L_PRAS40:down:c_Tor_C1:up:Atg1_dUCL:up:S6k:down:chico_IRS:up:c_Pi3K:up:Akt1_PKB:up:foxo:down:longevity:down
Lnk_dSH2B:down:c_Pi3K:down:Akt1_PKB:down:c_Tsc1_2:up:Rheb:down:c_Tor_C1:down:c_Tor_C2:up:Akt1_PKB:up:L_PRAS40:down:c_Tor_C1:up:Atg1_dUCL:up:S6k:down:chico_IRS:up:c_Pi3K:up:Akt1_PKB:up:foxo:down:longevity:down
Lnk_dSH2B:down:c_Pi3K:down:Pk61C_dPDK1:down:Akt1_PKB:down:L_PRAS40:up:c_Tor_C1:down:c_Tor_C2:up:Akt1_PKB:up:c_Tsc1_2:down:Rheb:up:c_Tor_C1:up:Atg1_dUCL:up:S6k:down:chico_IRS:up:c_Pi3K:up:Akt1_PKB:up:foxo:down:longevity:down
Lnk_dSH2B:down:c_Pi3K:down:Akt1_PKB:down:L_PRAS40:up:c_Tor_C1:down:c_Tor_C2:up:Akt1_PKB:up:c_Tsc1_2:down:Rheb:up:c_Tor_C1:up:Atg1_dUCL:up:S6k:down:chico_IRS:up:c_Pi3K:up:Akt1_PKB:up:foxo:down:longevity:down
Lnk_dSH2B:down:c_Pi3K:down:Pk61C_dPDK1:down:Akt1_PKB:down:c_Tsc1_2:up:Rheb:down:c_Tor_C1:down:c_Tor_C2:up:Akt1_PKB:up:c_Tsc1_2:down:Rheb:up:c_Tor_C1:up:Atg1_dUCL:up:S6k:down:chico_IRS:up:c_Pi3K:up:Akt1_PKB:up:foxo:down:longevity:down
Lnk_dSH2B:down:c_Pi3K:down:Akt1_PKB:down:c_Tsc1_2:up:Rheb:down:c_Tor_C1:down:c_Tor_C2:up:Akt1_PKB:up:c_Tsc1_2:down:Rheb:up:c_Tor_C1:up:Atg1_dUCL:up:S6k:down:chico_IRS:up:c_Pi3K:up:Akt1_PKB:up:foxo:down:longevity:down
Lnk_dSH2B:down:c_Pi3K:down:Pk61C_dPDK1:down:S6k:down:chico_IRS:up:c_Pi3K:up:Akt1_PKB:up:foxo:down:longevity:down
Lnk_dSH2B:down:c_Pi3K:down:Pk61C_dPDK1:down:Akt1_PKB:down:L_PRAS40:up:c_Tor_C1:down:S6k:down:chico_IRS:up:c_Pi3K:up:Akt1_PKB:up:foxo:down:longevity:down
Lnk_dSH2B:down:c_Pi3K:down:Akt1_PKB:down:L_PRAS40:up:c_Tor_C1:down:S6k:down:chico_IRS:up:c_Pi3K:up:Akt1_PKB:up:foxo:down:longevity:down
Lnk_dSH2B:down:c_Pi3K:down:Pk61C_dPDK1:down:Akt1_PKB:down:c_Tsc1_2:up:Rheb:down:c_Tor_C1:down:S6k:down:chico_IRS:up:c_Pi3K:up:Akt1_PKB:up:foxo:down:longevity:down
Lnk_dSH2B:down:c_Pi3K:down:Akt1_PKB:down:c_Tsc1_2:up:Rheb:down:c_Tor_C1:down:S6k:down:chico_IRS:up:c_Pi3K:up:Akt1_PKB:up:foxo:down:longevity:down
Lnk_dSH2B:down:c_Pi3K:down:Pk61C_dPDK1:down:Akt1_PKB:down:L_PRAS40:up:c_Tor_C1:down:c_Tor_C2:up:Akt1_PKB:up:foxo:down:longevity:down
Lnk_dSH2B:down:c_Pi3K:down:Akt1_PKB:down:L_PRAS40:up:c_Tor_C1:down:c_Tor_C2:up:Akt1_PKB:up:foxo:down:longevity:down
Lnk_dSH2B:down:c_Pi3K:down:Pk61C_dPDK1:down:Akt1_PKB:down:c_Tsc1_2:up:Rheb:down:c_Tor_C1:down:c_Tor_C2:up:Akt1_PKB:up:foxo:down:longevity:down
Lnk_dSH2B:down:c_Pi3K:down:Akt1_PKB:down:c_Tsc1_2:up:Rheb:down:c_Tor_C1:down:c_Tor_C2:up:Akt1_PKB:up:foxo:down:longevity:down
wdb_PP2A:down:Akt1_PKB:up:c_Tsc1_2:down:Rheb:up:c_Tor_C1:up:c_Tor_C2:down:Akt1_PKB:down:L_PRAS40:up:c_Tor_C1:down:c_Tor_C2:up:Akt1_PKB:up:L_PRAS40:down:c_Tor_C1:up:Atg1_dUCL:up:S6k:down:chico_IRS:up:c_Pi3K:up:Pk61C_dPDK1:up:Akt1_PKB:up:foxo:down:longevity:down
wdb_PP2A:down:Akt1_PKB:up:c_Tsc1_2:down:Rheb:up:c_Tor_C1:up:c_Tor_C2:down:Akt1_PKB:down:c_Tsc1_2:up:Rheb:down:c_Tor_C1:down:c_Tor_C2:up:Akt1_PKB:up:L_PRAS40:down:c_Tor_C1:up:Atg1_dUCL:up:S6k:down:chico_IRS:up:c_Pi3K:up:Pk61C_dPDK1:up:Akt1_PKB:up:foxo:down:longevity:down
wdb_PP2A:down:Akt1_PKB:up:L_PRAS40:down:c_Tor_C1:up:Atg1_dUCL:up:S6k:down:chico_IRS:up:c_Pi3K:up:Pk61C_dPDK1:up:Akt1_PKB:up:foxo:down:longevity:down
wdb_PP2A:down:Akt1_PKB:up:c_Tsc1_2:down:Rheb:up:c_Tor_C1:up:Atg1_dUCL:up:S6k:down:chico_IRS:up:c_Pi3K:up:Pk61C_dPDK1:up:Akt1_PKB:up:foxo:down:longevity:down
wdb_PP2A:down:Akt1_PKB:up:L_PRAS40:down:c_Tor_C1:up:c_Tor_C2:down:Akt1_PKB:down:L_PRAS40:up:c_Tor_C1:down:S6k:down:chico_IRS:up:c_Pi3K:up:Pk61C_dPDK1:up:Akt1_PKB:up:foxo:down:longevity:down
wdb_PP2A:down:Akt1_PKB:up:c_Tsc1_2:down:Rheb:up:c_Tor_C1:up:c_Tor_C2:down:Akt1_PKB:down:L_PRAS40:up:c_Tor_C1:down:S6k:down:chico_IRS:up:c_Pi3K:up:Pk61C_dPDK1:up:Akt1_PKB:up:foxo:down:longevity:down
wdb_PP2A:down:Akt1_PKB:up:L_PRAS40:down:c_Tor_C1:up:c_Tor_C2:down:Akt1_PKB:down:c_Tsc1_2:up:Rheb:down:c_Tor_C1:down:S6k:down:chico_IRS:up:c_Pi3K:up:Pk61C_dPDK1:up:Akt1_PKB:up:foxo:down:longevity:down
wdb_PP2A:down:Akt1_PKB:up:c_Tsc1_2:down:Rheb:up:c_Tor_C1:up:c_Tor_C2:down:Akt1_PKB:down:c_Tsc1_2:up:Rheb:down:c_Tor_C1:down:S6k:down:chico_IRS:up:c_Pi3K:up:Pk61C_dPDK1:up:Akt1_PKB:up:foxo:down:longevity:down
wdb_PP2A:down:Akt1_PKB:up:c_Tsc1_2:down:Rheb:up:c_Tor_C1:up:c_Tor_C2:down:Akt1_PKB:down:L_PRAS40:up:c_Tor_C1:down:c_Tor_C2:up:Akt1_PKB:up:L_PRAS40:down:c_Tor_C1:up:Atg1_dUCL:up:S6k:down:chico_IRS:up:c_Pi3K:up:Akt1_PKB:up:foxo:down:longevity:down
wdb_PP2A:down:Akt1_PKB:up:c_Tsc1_2:down:Rheb:up:c_Tor_C1:up:c_Tor_C2:down:Akt1_PKB:down:c_Tsc1_2:up:Rheb:down:c_Tor_C1:down:c_Tor_C2:up:Akt1_PKB:up:L_PRAS40:down:c_Tor_C1:up:Atg1_dUCL:up:S6k:down:chico_IRS:up:c_Pi3K:up:Akt1_PKB:up:foxo:down:longevity:down
wdb_PP2A:down:Akt1_PKB:up:L_PRAS40:down:c_Tor_C1:up:Atg1_dUCL:up:S6k:down:chico_IRS:up:c_Pi3K:up:Akt1_PKB:up:foxo:down:longevity:down
wdb_PP2A:down:Akt1_PKB:up:c_Tsc1_2:down:Rheb:up:c_Tor_C1:up:Atg1_dUCL:up:S6k:down:chico_IRS:up:c_Pi3K:up:Akt1_PKB:up:foxo:down:longevity:down
wdb_PP2A:down:Akt1_PKB:up:L_PRAS40:down:c_Tor_C1:up:c_Tor_C2:down:Akt1_PKB:down:L_PRAS40:up:c_Tor_C1:down:S6k:down:chico_IRS:up:c_Pi3K:up:Akt1_PKB:up:foxo:down:longevity:down
wdb_PP2A:down:Akt1_PKB:up:c_Tsc1_2:down:Rheb:up:c_Tor_C1:up:c_Tor_C2:down:Akt1_PKB:down:L_PRAS40:up:c_Tor_C1:down:S6k:down:chico_IRS:up:c_Pi3K:up:Akt1_PKB:up:foxo:down:longevity:down
wdb_PP2A:down:Akt1_PKB:up:L_PRAS40:down:c_Tor_C1:up:c_Tor_C2:down:Akt1_PKB:down:c_Tsc1_2:up:Rheb:down:c_Tor_C1:down:S6k:down:chico_IRS:up:c_Pi3K:up:Akt1_PKB:up:foxo:down:longevity:down
wdb_PP2A:down:Akt1_PKB:up:c_Tsc1_2:down:Rheb:up:c_Tor_C1:up:c_Tor_C2:down:Akt1_PKB:down:c_Tsc1_2:up:Rheb:down:c_Tor_C1:down:S6k:down:chico_IRS:up:c_Pi3K:up:Akt1_PKB:up:foxo:down:longevity:down
wdb_PP2A:down:Akt1_PKB:up:L_PRAS40:down:c_Tor_C1:up:c_Tor_C2:down:Akt1_PKB:down:L_PRAS40:up:c_Tor_C1:down:c_Tor_C2:up:Akt1_PKB:up:foxo:down:longevity:down
wdb_PP2A:down:Akt1_PKB:up:c_Tsc1_2:down:Rheb:up:c_Tor_C1:up:c_Tor_C2:down:Akt1_PKB:down:L_PRAS40:up:c_Tor_C1:down:c_Tor_C2:up:Akt1_PKB:up:foxo:down:longevity:down
wdb_PP2A:down:Akt1_PKB:up:L_PRAS40:down:c_Tor_C1:up:c_Tor_C2:down:Akt1_PKB:down:c_Tsc1_2:up:Rheb:down:c_Tor_C1:down:c_Tor_C2:up:Akt1_PKB:up:foxo:down:longevity:down
wdb_PP2A:down:Akt1_PKB:up:c_Tsc1_2:down:Rheb:up:c_Tor_C1:up:c_Tor_C2:down:Akt1_PKB:down:c_Tsc1_2:up:Rheb:down:c_Tor_C1:down:c_Tor_C2:up:Akt1_PKB:up:foxo:down:longevity:down
wdb_PP2A:down:Akt1_PKB:up:foxo:down:longevity:down

## Sheet: InR All Paths
path
InR:down:Lnk_dSH2B:down:c_Pi3K:down:Pk61C_dPDK1:down:Akt1_PKB:down:foxo:up:longevity:up
InR:down:chico_IRS:down:c_Pi3K:down:Pk61C_dPDK1:down:Akt1_PKB:down:foxo:up:longevity:up
InR:down:Lnk_dSH2B:down:c_Pi3K:down:Akt1_PKB:down:foxo:up:longevity:up
InR:down:chico_IRS:down:c_Pi3K:down:Akt1_PKB:down:foxo:up:longevity:up
InR:down:Lnk_dSH2B:down:c_Pi3K:down:Pk61C_dPDK1:down:S6k:down:chico_IRS:up:c_Pi3K:up:Pk61C_dPDK1:up:Akt1_PKB:up:c_Tsc1_2:down:Rheb:up:c_Tor_C1:up:c_Tor_C2:down:Akt1_PKB:down:foxo:up:longevity:up
InR:down:chico_IRS:down:c_Pi3K:down:Pk61C_dPDK1:down:S6k:down:chico_IRS:up:c_Pi3K:up:Pk61C_dPDK1:up:Akt1_PKB:up:c_Tsc1_2:down:Rheb:up:c_Tor_C1:up:c_Tor_C2:down:Akt1_PKB:down:foxo:up:longevity:up
InR:down:Lnk_dSH2B:down:c_Pi3K:down:Pk61C_dPDK1:down:S6k:down:chico_IRS:up:c_Pi3K:up:Akt1_PKB:up:c_Tsc1_2:down:Rheb:up:c_Tor_C1:up:c_Tor_C2:down:Akt1_PKB:down:foxo:up:longevity:up
InR:down:chico_IRS:down:c_Pi3K:down:Pk61C_dPDK1:down:S6k:down:chico_IRS:up:c_Pi3K:up:Akt1_PKB:up:c_Tsc1_2:down:Rheb:up:c_Tor_C1:up:c_Tor_C2:down:Akt1_PKB:down:foxo:up:longevity:up
L_PRAS40:up:c_Tor_C1:down:Atg1_dUCL:down:S6k:up:chico_IRS:down:c_Pi3K:down:Pk61C_dPDK1:down:Akt1_PKB:down:foxo:up:longevity:up
L_PRAS40:up:c_Tor_C1:down:c_Tor_C2:up:Akt1_PKB:up:c_Tsc1_2:down:Rheb:up:c_Tor_C1:up:Atg1_dUCL:up:S6k:down:chico_IRS:up:c_Pi3K:up:Pk61C_dPDK1:up:S6k:up:chico_IRS:down:c_Pi3K:down:Pk61C_dPDK1:down:Akt1_PKB:down:foxo:up:longevity:up
L_PRAS40:up:c_Tor_C1:down:S6k:down:chico_IRS:up:c_Pi3K:up:Pk61C_dPDK1:up:S6k:up:chico_IRS:down:c_Pi3K:down:Pk61C_dPDK1:down:Akt1_PKB:down:foxo:up:longevity:up
L_PRAS40:up:c_Tor_C1:down:S6k:down:chico_IRS:up:c_Pi3K:up:Pk61C_dPDK1:up:Akt1_PKB:up:c_Tsc1_2:down:Rheb:up:c_Tor_C1:up:S6k:up:chico_IRS:down:c_Pi3K:down:Pk61C_dPDK1:down:Akt1_PKB:down:foxo:up:longevity:up
L_PRAS40:up:c_Tor_C1:down:S6k:down:chico_IRS:up:c_Pi3K:up:Akt1_PKB:up:c_Tsc1_2:down:Rheb:up:c_Tor_C1:up:S6k:up:chico_IRS:down:c_Pi3K:down:Pk61C_dPDK1:down:Akt1_PKB:down:foxo:up:longevity:up
L_PRAS40:up:c_Tor_C1:down:c_Tor_C2:up:Akt1_PKB:up:c_Tsc1_2:down:Rheb:up:c_Tor_C1:up:S6k:up:chico_IRS:down:c_Pi3K:down:Pk61C_dPDK1:down:Akt1_PKB:down:foxo:up:longevity:up
L_PRAS40:up:c_Tor_C1:down:Atg1_dUCL:down:S6k:up:chico_IRS:down:c_Pi3K:down:Akt1_PKB:down:foxo:up:longevity:up
L_PRAS40:up:c_Tor_C1:down:c_Tor_C2:up:Akt1_PKB:up:c_Tsc1_2:down:Rheb:up:c_Tor_C1:up:Atg1_dUCL:up:S6k:down:chico_IRS:up:c_Pi3K:up:Pk61C_dPDK1:up:S6k:up:chico_IRS:down:c_Pi3K:down:Akt1_PKB:down:foxo:up:longevity:up
L_PRAS40:up:c_Tor_C1:down:S6k:down:chico_IRS:up:c_Pi3K:up:Pk61C_dPDK1:up:S6k:up:chico_IRS:down:c_Pi3K:down:Akt1_PKB:down:foxo:up:longevity:up
L_PRAS40:up:c_Tor_C1:down:S6k:down:chico_IRS:up:c_Pi3K:up:Pk61C_dPDK1:up:Akt1_PKB:up:c_Tsc1_2:down:Rheb:up:c_Tor_C1:up:S6k:up:chico_IRS:down:c_Pi3K:down:Akt1_PKB:down:foxo:up:longevity:up
L_PRAS40:up:c_Tor_C1:down:S6k:down:chico_IRS:up:c_Pi3K:up:Akt1_PKB:up:c_Tsc1_2:down:Rheb:up:c_Tor_C1:up:S6k:up:chico_IRS:down:c_Pi3K:down:Akt1_PKB:down:foxo:up:longevity:up
L_PRAS40:up:c_Tor_C1:down:c_Tor_C2:up:Akt1_PKB:up:c_Tsc1_2:down:Rheb:up:c_Tor_C1:up:S6k:up:chico_IRS:down:c_Pi3K:down:Akt1_PKB:down:foxo:up:longevity:up
L_PRAS40:up:c_Tor_C1:down:Atg1_dUCL:down:S6k:up:chico_IRS:down:c_Pi3K:down:Pk61C_dPDK1:down:S6k:down:chico_IRS:up:c_Pi3K:up:Pk61C_dPDK1:up:Akt1_PKB:up:c_Tsc1_2:down:Rheb:up:c_Tor_C1:up:c_Tor_C2:down:Akt1_PKB:down:foxo:up:longevity:up
L_PRAS40:up:c_Tor_C1:down:S6k:down:chico_IRS:up:c_Pi3K:up:Pk61C_dPDK1:up:Akt1_PKB:up:c_Tsc1_2:down:Rheb:up:c_Tor_C1:up:c_Tor_C2:down:Akt1_PKB:down:foxo:up:longevity:up
L_PRAS40:up:c_Tor_C1:down:Atg1_dUCL:down:S6k:up:chico_IRS:down:c_Pi3K:down:Pk61C_dPDK1:down:S6k:down:chico_IRS:up:c_Pi3K:up:Akt1_PKB:up:c_Tsc1_2:down:Rheb:up:c_Tor_C1:up:c_Tor_C2:down:Akt1_PKB:down:foxo:up:longevity:up
L_PRAS40:up:c_Tor_C1:down:S6k:down:chico_IRS:up:c_Pi3K:up:Akt1_PKB:up:c_Tsc1_2:down:Rheb:up:c_Tor_C1:up:c_Tor_C2:down:Akt1_PKB:down:foxo:up:longevity:up
L_PRAS40:up:c_Tor_C1:down:c_Tor_C2:up:Akt1_PKB:up:c_Tsc1_2:down:Rheb:up:c_Tor_C1:up:c_Tor_C2:down:Akt1_PKB:down:foxo:up:longevity:up
Tak1:up:hep_dJNKK:up:bsk_dJNK:up:chico_IRS:down:c_Pi3K:down:Pk61C_dPDK1:down:Akt1_PKB:down:foxo:up:longevity:up
Tak1:up:hep_dJNKK:up:bsk_dJNK:up:chico_IRS:down:c_Pi3K:down:Akt1_PKB:down:foxo:up:longevity:up
Tak1:up:hep_dJNKK:up:bsk_dJNK:up:chico_IRS:down:c_Pi3K:down:Pk61C_dPDK1:down:S6k:down:chico_IRS:up:c_Pi3K:up:Pk61C_dPDK1:up:Akt1_PKB:up:c_Tsc1_2:down:Rheb:up:c_Tor_C1:up:c_Tor_C2:down:Akt1_PKB:down:foxo:up:longevity:up
Tak1:up:hep_dJNKK:up:bsk_dJNK:up:chico_IRS:down:c_Pi3K:down:Pk61C_dPDK1:down:S6k:down:chico_IRS:up:c_Pi3K:up:Akt1_PKB:up:c_Tsc1_2:down:Rheb:up:c_Tor_C1:up:c_Tor_C2:down:Akt1_PKB:down:foxo:up:longevity:up
Tak1:up:hep_dJNKK:up:bsk_dJNK:up:foxo:up:longevity:up
InR:down:Lnk_dSH2B:down:c_Pi3K:down:Pk61C_dPDK1:down:Akt1_PKB:down:L_PRAS40:up:c_Tor_C1:down:c_Tor_C2:up:Akt1_PKB:up:c_Tsc1_2:down:Rheb:up:c_Tor_C1:up:Atg1_dUCL:up:S6k:down:chico_IRS:up:c_Pi3K:up:Pk61C_dPDK1:up:Akt1_PKB:up:foxo:down:longevity:down
InR:down:chico_IRS:down:c_Pi3K:down:Pk61C_dPDK1:down:Akt1_PKB:down:L_PRAS40:up:c_Tor_C1:down:c_Tor_C2:up:Akt1_PKB:up:c_Tsc1_2:down:Rheb:up:c_Tor_C1:up:Atg1_dUCL:up:S6k:down:chico_IRS:up:c_Pi3K:up:Pk61C_dPDK1:up:Akt1_PKB:up:foxo:down:longevity:down
InR:down:Lnk_dSH2B:down:c_Pi3K:down:Akt1_PKB:down:L_PRAS40:up:c_Tor_C1:down:c_Tor_C2:up:Akt1_PKB:up:c_Tsc1_2:down:Rheb:up:c_Tor_C1:up:Atg1_dUCL:up:S6k:down:chico_IRS:up:c_Pi3K:up:Pk61C_dPDK1:up:Akt1_PKB:up:foxo:down:longevity:down
InR:down:chico_IRS:down:c_Pi3K:down:Akt1_PKB:down:L_PRAS40:up:c_Tor_C1:down:c_Tor_C2:up:Akt1_PKB:up:c_Tsc1_2:down:Rheb:up:c_Tor_C1:up:Atg1_dUCL:up:S6k:down:chico_IRS:up:c_Pi3K:up:Pk61C_dPDK1:up:Akt1_PKB:up:foxo:down:longevity:down
InR:down:Lnk_dSH2B:down:c_Pi3K:down:Pk61C_dPDK1:down:Akt1_PKB:down:c_Tsc1_2:up:Rheb:down:c_Tor_C1:down:c_Tor_C2:up:Akt1_PKB:up:c_Tsc1_2:down:Rheb:up:c_Tor_C1:up:Atg1_dUCL:up:S6k:down:chico_IRS:up:c_Pi3K:up:Pk61C_dPDK1:up:Akt1_PKB:up:foxo:down:longevity:down
InR:down:chico_IRS:down:c_Pi3K:down:Pk61C_dPDK1:down:Akt1_PKB:down:c_Tsc1_2:up:Rheb:down:c_Tor_C1:down:c_Tor_C2:up:Akt1_PKB:up:c_Tsc1_2:down:Rheb:up:c_Tor_C1:up:Atg1_dUCL:up:S6k:down:chico_IRS:up:c_Pi3K:up:Pk61C_dPDK1:up:Akt1_PKB:up:foxo:down:longevity:down
InR:down:Lnk_dSH2B:down:c_Pi3K:down:Akt1_PKB:down:c_Tsc1_2:up:Rheb:down:c_Tor_C1:down:c_Tor_C2:up:Akt1_PKB:up:c_Tsc1_2:down:Rheb:up:c_Tor_C1:up:Atg1_dUCL:up:S6k:down:chico_IRS:up:c_Pi3K:up:Pk61C_dPDK1:up:Akt1_PKB:up:foxo:down:longevity:down
InR:down:chico_IRS:down:c_Pi3K:down:Akt1_PKB:down:c_Tsc1_2:up:Rheb:down:c_Tor_C1:down:c_Tor_C2:up:Akt1_PKB:up:c_Tsc1_2:down:Rheb:up:c_Tor_C1:up:Atg1_dUCL:up:S6k:down:chico_IRS:up:c_Pi3K:up:Pk61C_dPDK1:up:Akt1_PKB:up:foxo:down:longevity:down
InR:down:Lnk_dSH2B:down:c_Pi3K:down:Pk61C_dPDK1:down:S6k:down:chico_IRS:up:c_Pi3K:up:Pk61C_dPDK1:up:Akt1_PKB:up:foxo:down:longevity:down
InR:down:chico_IRS:down:c_Pi3K:down:Pk61C_dPDK1:down:S6k:down:chico_IRS:up:c_Pi3K:up:Pk61C_dPDK1:up:Akt1_PKB:up:foxo:down:longevity:down
InR:down:Lnk_dSH2B:down:c_Pi3K:down:Pk61C_dPDK1:down:Akt1_PKB:down:L_PRAS40:up:c_Tor_C1:down:S6k:down:chico_IRS:up:c_Pi3K:up:Pk61C_dPDK1:up:Akt1_PKB:up:foxo:down:longevity:down
InR:down:chico_IRS:down:c_Pi3K:down:Pk61C_dPDK1:down:Akt1_PKB:down:L_PRAS40:up:c_Tor_C1:down:S6k:down:chico_IRS:up:c_Pi3K:up:Pk61C_dPDK1:up:Akt1_PKB:up:foxo:down:longevity:down
InR:down:Lnk_dSH2B:down:c_Pi3K:down:Akt1_PKB:down:L_PRAS40:up:c_Tor_C1:down:S6k:down:chico_IRS:up:c_Pi3K:up:Pk61C_dPDK1:up:Akt1_PKB:up:foxo:down:longevity:down
InR:down:chico_IRS:down:c_Pi3K:down:Akt1_PKB:down:L_PRAS40:up:c_Tor_C1:down:S6k:down:chico_IRS:up:c_Pi3K:up:Pk61C_dPDK1:up:Akt1_PKB:up:foxo:down:longevity:down
InR:down:Lnk_dSH2B:down:c_Pi3K:down:Pk61C_dPDK1:down:Akt1_PKB:down:c_Tsc1_2:up:Rheb:down:c_Tor_C1:down:S6k:down:chico_IRS:up:c_Pi3K:up:Pk61C_dPDK1:up:Akt1_PKB:up:foxo:down:longevity:down
InR:down:chico_IRS:down:c_Pi3K:down:Pk61C_dPDK1:down:Akt1_PKB:down:c_Tsc1_2:up:Rheb:down:c_Tor_C1:down:S6k:down:chico_IRS:up:c_Pi3K:up:Pk61C_dPDK1:up:Akt1_PKB:up:foxo:down:longevity:down
InR:down:Lnk_dSH2B:down:c_Pi3K:down:Akt1_PKB:down:c_Tsc1_2:up:Rheb:down:c_Tor_C1:down:S6k:down:chico_IRS:up:c_Pi3K:up:Pk61C_dPDK1:up:Akt1_PKB:up:foxo:down:longevity:down
InR:down:chico_IRS:down:c_Pi3K:down:Akt1_PKB:down:c_Tsc1_2:up:Rheb:down:c_Tor_C1:down:S6k:down:chico_IRS:up:c_Pi3K:up:Pk61C_dPDK1:up:Akt1_PKB:up:foxo:down:longevity:down
InR:down:Lnk_dSH2B:down:c_Pi3K:down:Pk61C_dPDK1:down:Akt1_PKB:down:L_PRAS40:up:c_Tor_C1:down:c_Tor_C2:up:Akt1_PKB:up:c_Tsc1_2:down:Rheb:up:c_Tor_C1:up:Atg1_dUCL:up:S6k:down:chico_IRS:up:c_Pi3K:up:Akt1_PKB:up:foxo:down:longevity:down
InR:down:chico_IRS:down:c_Pi3K:down:Pk61C_dPDK1:down:Akt1_PKB:down:L_PRAS40:up:c_Tor_C1:down:c_Tor_C2:up:Akt1_PKB:up:c_Tsc1_2:down:Rheb:up:c_Tor_C1:up:Atg1_dUCL:up:S6k:down:chico_IRS:up:c_Pi3K:up:Akt1_PKB:up:foxo:down:longevity:down
InR:down:Lnk_dSH2B:down:c_Pi3K:down:Akt1_PKB:down:L_PRAS40:up:c_Tor_C1:down:c_Tor_C2:up:Akt1_PKB:up:c_Tsc1_2:down:Rheb:up:c_Tor_C1:up:Atg1_dUCL:up:S6k:down:chico_IRS:up:c_Pi3K:up:Akt1_PKB:up:foxo:down:longevity:down
InR:down:chico_IRS:down:c_Pi3K:down:Akt1_PKB:down:L_PRAS40:up:c_Tor_C1:down:c_Tor_C2:up:Akt1_PKB:up:c_Tsc1_2:down:Rheb:up:c_Tor_C1:up:Atg1_dUCL:up:S6k:down:chico_IRS:up:c_Pi3K:up:Akt1_PKB:up:foxo:down:longevity:down
InR:down:Lnk_dSH2B:down:c_Pi3K:down:Pk61C_dPDK1:down:Akt1_PKB:down:c_Tsc1_2:up:Rheb:down:c_Tor_C1:down:c_Tor_C2:up:Akt1_PKB:up:c_Tsc1_2:down:Rheb:up:c_Tor_C1:up:Atg1_dUCL:up:S6k:down:chico_IRS:up:c_Pi3K:up:Akt1_PKB:up:foxo:down:longevity:down
InR:down:chico_IRS:down:c_Pi3K:down:Pk61C_dPDK1:down:Akt1_PKB:down:c_Tsc1_2:up:Rheb:down:c_Tor_C1:down:c_Tor_C2:up:Akt1_PKB:up:c_Tsc1_2:down:Rheb:up:c_Tor_C1:up:Atg1_dUCL:up:S6k:down:chico_IRS:up:c_Pi3K:up:Akt1_PKB:up:foxo:down:longevity:down
InR:down:Lnk_dSH2B:down:c_Pi3K:down:Akt1_PKB:down:c_Tsc1_2:up:Rheb:down:c_Tor_C1:down:c_Tor_C2:up:Akt1_PKB:up:c_Tsc1_2:down:Rheb:up:c_Tor_C1:up:Atg1_dUCL:up:S6k:down:chico_IRS:up:c_Pi3K:up:Akt1_PKB:up:foxo:down:longevity:down
InR:down:chico_IRS:down:c_Pi3K:down:Akt1_PKB:down:c_Tsc1_2:up:Rheb:down:c_Tor_C1:down:c_Tor_C2:up:Akt1_PKB:up:c_Tsc1_2:down:Rheb:up:c_Tor_C1:up:Atg1_dUCL:up:S6k:down:chico_IRS:up:c_Pi3K:up:Akt1_PKB:up:foxo:down:longevity:down
InR:down:Lnk_dSH2B:down:c_Pi3K:down:Pk61C_dPDK1:down:S6k:down:chico_IRS:up:c_Pi3K:up:Akt1_PKB:up:foxo:down:longevity:down
InR:down:chico_IRS:down:c_Pi3K:down:Pk61C_dPDK1:down:S6k:down:chico_IRS:up:c_Pi3K:up:Akt1_PKB:up:foxo:down:longevity:down
InR:down:Lnk_dSH2B:down:c_Pi3K:down:Pk61C_dPDK1:down:Akt1_PKB:down:L_PRAS40:up:c_Tor_C1:down:S6k:down:chico_IRS:up:c_Pi3K:up:Akt1_PKB:up:foxo:down:longevity:down
InR:down:chico_IRS:down:c_Pi3K:down:Pk61C_dPDK1:down:Akt1_PKB:down:L_PRAS40:up:c_Tor_C1:down:S6k:down:chico_IRS:up:c_Pi3K:up:Akt1_PKB:up:foxo:down:longevity:down
InR:down:Lnk_dSH2B:down:c_Pi3K:down:Akt1_PKB:down:L_PRAS40:up:c_Tor_C1:down:S6k:down:chico_IRS:up:c_Pi3K:up:Akt1_PKB:up:foxo:down:longevity:down
InR:down:chico_IRS:down:c_Pi3K:down:Akt1_PKB:down:L_PRAS40:up:c_Tor_C1:down:S6k:down:chico_IRS:up:c_Pi3K:up:Akt1_PKB:up:foxo:down:longevity:down
InR:down:Lnk_dSH2B:down:c_Pi3K:down:Pk61C_dPDK1:down:Akt1_PKB:down:c_Tsc1_2:up:Rheb:down:c_Tor_C1:down:S6k:down:chico_IRS:up:c_Pi3K:up:Akt1_PKB:up:foxo:down:longevity:down
InR:down:chico_IRS:down:c_Pi3K:down:Pk61C_dPDK1:down:Akt1_PKB:down:c_Tsc1_2:up:Rheb:down:c_Tor_C1:down:S6k:down:chico_IRS:up:c_Pi3K:up:Akt1_PKB:up:foxo:down:longevity:down
InR:down:Lnk_dSH2B:down:c_Pi3K:down:Akt1_PKB:down:c_Tsc1_2:up:Rheb:down:c_Tor_C1:down:S6k:down:chico_IRS:up:c_Pi3K:up:Akt1_PKB:up:foxo:down:longevity:down
InR:down:chico_IRS:down:c_Pi3K:down:Akt1_PKB:down:c_Tsc1_2:up:Rheb:down:c_Tor_C1:down:S6k:down:chico_IRS:up:c_Pi3K:up:Akt1_PKB:up:foxo:down:longevity:down
InR:down:Lnk_dSH2B:down:c_Pi3K:down:Pk61C_dPDK1:down:Akt1_PKB:down:L_PRAS40:up:c_Tor_C1:down:c_Tor_C2:up:Akt1_PKB:up:foxo:down:longevity:down
InR:down:chico_IRS:down:c_Pi3K:down:Pk61C_dPDK1:down:Akt1_PKB:down:L_PRAS40:up:c_Tor_C1:down:c_Tor_C2:up:Akt1_PKB:up:foxo:down:longevity:down
InR:down:Lnk_dSH2B:down:c_Pi3K:down:Akt1_PKB:down:L_PRAS40:up:c_Tor_C1:down:c_Tor_C2:up:Akt1_PKB:up:foxo:down:longevity:down
InR:down:chico_IRS:down:c_Pi3K:down:Akt1_PKB:down:L_PRAS40:up:c_Tor_C1:down:c_Tor_C2:up:Akt1_PKB:up:foxo:down:longevity:down
InR:down:Lnk_dSH2B:down:c_Pi3K:down:Pk61C_dPDK1:down:Akt1_PKB:down:c_Tsc1_2:up:Rheb:down:c_Tor_C1:down:c_Tor_C2:up:Akt1_PKB:up:foxo:down:longevity:down
InR:down:chico_IRS:down:c_Pi3K:down:Pk61C_dPDK1:down:Akt1_PKB:down:c_Tsc1_2:up:Rheb:down:c_Tor_C1:down:c_Tor_C2:up:Akt1_PKB:up:foxo:down:longevity:down
InR:down:Lnk_dSH2B:down:c_Pi3K:down:Akt1_PKB:down:c_Tsc1_2:up:Rheb:down:c_Tor_C1:down:c_Tor_C2:up:Akt1_PKB:up:foxo:down:longevity:down
InR:down:chico_IRS:down:c_Pi3K:down:Akt1_PKB:down:c_Tsc1_2:up:Rheb:down:c_Tor_C1:down:c_Tor_C2:up:Akt1_PKB:up:foxo:down:longevity:down
L_PRAS40:up:c_Tor_C1:down:c_Tor_C2:up:Akt1_PKB:up:c_Tsc1_2:down:Rheb:up:c_Tor_C1:up:Atg1_dUCL:up:S6k:down:chico_IRS:up:c_Pi3K:up:Pk61C_dPDK1:up:Akt1_PKB:up:foxo:down:longevity:down
L_PRAS40:up:c_Tor_C1:down:Atg1_dUCL:down:S6k:up:chico_IRS:down:c_Pi3K:down:Pk61C_dPDK1:down:S6k:down:chico_IRS:up:c_Pi3K:up:Pk61C_dPDK1:up:Akt1_PKB:up:foxo:down:longevity:down
L_PRAS40:up:c_Tor_C1:down:c_Tor_C2:up:Akt1_PKB:up:c_Tsc1_2:down:Rheb:up:c_Tor_C1:up:S6k:up:chico_IRS:down:c_Pi3K:down:Pk61C_dPDK1:down:S6k:down:chico_IRS:up:c_Pi3K:up:Pk61C_dPDK1:up:Akt1_PKB:up:foxo:down:longevity:down
L_PRAS40:up:c_Tor_C1:down:S6k:down:chico_IRS:up:c_Pi3K:up:Pk61C_dPDK1:up:Akt1_PKB:up:foxo:down:longevity:down
L_PRAS40:up:c_Tor_C1:down:c_Tor_C2:up:Akt1_PKB:up:c_Tsc1_2:down:Rheb:up:c_Tor_C1:up:Atg1_dUCL:up:S6k:down:chico_IRS:up:c_Pi3K:up:Akt1_PKB:up:foxo:down:longevity:down
L_PRAS40:up:c_Tor_C1:down:Atg1_dUCL:down:S6k:up:chico_IRS:down:c_Pi3K:down:Pk61C_dPDK1:down:S6k:down:chico_IRS:up:c_Pi3K:up:Akt1_PKB:up:foxo:down:longevity:down
L_PRAS40:up:c_Tor_C1:down:c_Tor_C2:up:Akt1_PKB:up:c_Tsc1_2:down:Rheb:up:c_Tor_C1:up:S6k:up:chico_IRS:down:c_Pi3K:down:Pk61C_dPDK1:down:S6k:down:chico_IRS:up:c_Pi3K:up:Akt1_PKB:up:foxo:down:longevity:down
L_PRAS40:up:c_Tor_C1:down:S6k:down:chico_IRS:up:c_Pi3K:up:Akt1_PKB:up:foxo:down:longevity:down
L_PRAS40:up:c_Tor_C1:down:c_Tor_C2:up:Akt1_PKB:up:foxo:down:longevity:down
Tak1:up:hep_dJNKK:up:bsk_dJNK:up:chico_IRS:down:c_Pi3K:down:Pk61C_dPDK1:down:Akt1_PKB:down:L_PRAS40:up:c_Tor_C1:down:c_Tor_C2:up:Akt1_PKB:up:c_Tsc1_2:down:Rheb:up:c_Tor_C1:up:Atg1_dUCL:up:S6k:down:chico_IRS:up:c_Pi3K:up:Pk61C_dPDK1:up:Akt1_PKB:up:foxo:down:longevity:down
Tak1:up:hep_dJNKK:up:bsk_dJNK:up:chico_IRS:down:c_Pi3K:down:Akt1_PKB:down:L_PRAS40:up:c_Tor_C1:down:c_Tor_C2:up:Akt1_PKB:up:c_Tsc1_2:down:Rheb:up:c_Tor_C1:up:Atg1_dUCL:up:S6k:down:chico_IRS:up:c_Pi3K:up:Pk61C_dPDK1:up:Akt1_PKB:up:foxo:down:longevity:down
Tak1:up:hep_dJNKK:up:bsk_dJNK:up:chico_IRS:down:c_Pi3K:down:Pk61C_dPDK1:down:Akt1_PKB:down:c_Tsc1_2:up:Rheb:down:c_Tor_C1:down:c_Tor_C2:up:Akt1_PKB:up:c_Tsc1_2:down:Rheb:up:c_Tor_C1:up:Atg1_dUCL:up:S6k:down:chico_IRS:up:c_Pi3K:up:Pk61C_dPDK1:up:Akt1_PKB:up:foxo:down:longevity:down
Tak1:up:hep_dJNKK:up:bsk_dJNK:up:chico_IRS:down:c_Pi3K:down:Akt1_PKB:down:c_Tsc1_2:up:Rheb:down:c_Tor_C1:down:c_Tor_C2:up:Akt1_PKB:up:c_Tsc1_2:down:Rheb:up:c_Tor_C1:up:Atg1_dUCL:up:S6k:down:chico_IRS:up:c_Pi3K:up:Pk61C_dPDK1:up:Akt1_PKB:up:foxo:down:longevity:down
Tak1:up:hep_dJNKK:up:bsk_dJNK:up:chico_IRS:down:c_Pi3K:down:Pk61C_dPDK1:down:S6k:down:chico_IRS:up:c_Pi3K:up:Pk61C_dPDK1:up:Akt1_PKB:up:foxo:down:longevity:down
Tak1:up:hep_dJNKK:up:bsk_dJNK:up:chico_IRS:down:c_Pi3K:down:Pk61C_dPDK1:down:Akt1_PKB:down:L_PRAS40:up:c_Tor_C1:down:S6k:down:chico_IRS:up:c_Pi3K:up:Pk61C_dPDK1:up:Akt1_PKB:up:foxo:down:longevity:down
Tak1:up:hep_dJNKK:up:bsk_dJNK:up:chico_IRS:down:c_Pi3K:down:Akt1_PKB:down:L_PRAS40:up:c_Tor_C1:down:S6k:down:chico_IRS:up:c_Pi3K:up:Pk61C_dPDK1:up:Akt1_PKB:up:foxo:down:longevity:down
Tak1:up:hep_dJNKK:up:bsk_dJNK:up:chico_IRS:down:c_Pi3K:down:Pk61C_dPDK1:down:Akt1_PKB:down:c_Tsc1_2:up:Rheb:down:c_Tor_C1:down:S6k:down:chico_IRS:up:c_Pi3K:up:Pk61C_dPDK1:up:Akt1_PKB:up:foxo:down:longevity:down
Tak1:up:hep_dJNKK:up:bsk_dJNK:up:chico_IRS:down:c_Pi3K:down:Akt1_PKB:down:c_Tsc1_2:up:Rheb:down:c_Tor_C1:down:S6k:down:chico_IRS:up:c_Pi3K:up:Pk61C_dPDK1:up:Akt1_PKB:up:foxo:down:longevity:down
Tak1:up:hep_dJNKK:up:bsk_dJNK:up:chico_IRS:down:c_Pi3K:down:Pk61C_dPDK1:down:Akt1_PKB:down:L_PRAS40:up:c_Tor_C1:down:c_Tor_C2:up:Akt1_PKB:up:c_Tsc1_2:down:Rheb:up:c_Tor_C1:up:Atg1_dUCL:up:S6k:down:chico_IRS:up:c_Pi3K:up:Akt1_PKB:up:foxo:down:longevity:down
Tak1:up:hep_dJNKK:up:bsk_dJNK:up:chico_IRS:down:c_Pi3K:down:Akt1_PKB:down:L_PRAS40:up:c_Tor_C1:down:c_Tor_C2:up:Akt1_PKB:up:c_Tsc1_2:down:Rheb:up:c_Tor_C1:up:Atg1_dUCL:up:S6k:down:chico_IRS:up:c_Pi3K:up:Akt1_PKB:up:foxo:down:longevity:down
Tak1:up:hep_dJNKK:up:bsk_dJNK:up:chico_IRS:down:c_Pi3K:down:Pk61C_dPDK1:down:Akt1_PKB:down:c_Tsc1_2:up:Rheb:down:c_Tor_C1:down:c_Tor_C2:up:Akt1_PKB:up:c_Tsc1_2:down:Rheb:up:c_Tor_C1:up:Atg1_dUCL:up:S6k:down:chico_IRS:up:c_Pi3K:up:Akt1_PKB:up:foxo:down:longevity:down
Tak1:up:hep_dJNKK:up:bsk_dJNK:up:chico_IRS:down:c_Pi3K:down:Akt1_PKB:down:c_Tsc1_2:up:Rheb:down:c_Tor_C1:down:c_Tor_C2:up:Akt1_PKB:up:c_Tsc1_2:down:Rheb:up:c_Tor_C1:up:Atg1_dUCL:up:S6k:down:chico_IRS:up:c_Pi3K:up:Akt1_PKB:up:foxo:down:longevity:down
Tak1:up:hep_dJNKK:up:bsk_dJNK:up:chico_IRS:down:c_Pi3K:down:Pk61C_dPDK1:down:S6k:down:chico_IRS:up:c_Pi3K:up:Akt1_PKB:up:foxo:down:longevity:down
Tak1:up:hep_dJNKK:up:bsk_dJNK:up:chico_IRS:down:c_Pi3K:down:Pk61C_dPDK1:down:Akt1_PKB:down:L_PRAS40:up:c_Tor_C1:down:S6k:down:chico_IRS:up:c_Pi3K:up:Akt1_PKB:up:foxo:down:longevity:down
Tak1:up:hep_dJNKK:up:bsk_dJNK:up:chico_IRS:down:c_Pi3K:down:Akt1_PKB:down:L_PRAS40:up:c_Tor_C1:down:S6k:down:chico_IRS:up:c_Pi3K:up:Akt1_PKB:up:foxo:down:longevity:down
Tak1:up:hep_dJNKK:up:bsk_dJNK:up:chico_IRS:down:c_Pi3K:down:Pk61C_dPDK1:down:Akt1_PKB:down:c_Tsc1_2:up:Rheb:down:c_Tor_C1:down:S6k:down:chico_IRS:up:c_Pi3K:up:Akt1_PKB:up:foxo:down:longevity:down
Tak1:up:hep_dJNKK:up:bsk_dJNK:up:chico_IRS:down:c_Pi3K:down:Akt1_PKB:down:c_Tsc1_2:up:Rheb:down:c_Tor_C1:down:S6k:down:chico_IRS:up:c_Pi3K:up:Akt1_PKB:up:foxo:down:longevity:down
Tak1:up:hep_dJNKK:up:bsk_dJNK:up:chico_IRS:down:c_Pi3K:down:Pk61C_dPDK1:down:Akt1_PKB:down:L_PRAS40:up:c_Tor_C1:down:c_Tor_C2:up:Akt1_PKB:up:foxo:down:longevity:down
Tak1:up:hep_dJNKK:up:bsk_dJNK:up:chico_IRS:down:c_Pi3K:down:Akt1_PKB:down:L_PRAS40:up:c_Tor_C1:down:c_Tor_C2:up:Akt1_PKB:up:foxo:down:longevity:down
Tak1:up:hep_dJNKK:up:bsk_dJNK:up:chico_IRS:down:c_Pi3K:down:Pk61C_dPDK1:down:Akt1_PKB:down:c_Tsc1_2:up:Rheb:down:c_Tor_C1:down:c_Tor_C2:up:Akt1_PKB:up:foxo:down:longevity:down
Tak1:up:hep_dJNKK:up:bsk_dJNK:up:chico_IRS:down:c_Pi3K:down:Akt1_PKB:down:c_Tsc1_2:up:Rheb:down:c_Tor_C1:down:c_Tor_C2:up:Akt1_PKB:up:foxo:down:longevity:down

## Sheet: foxo All Paths
path
foxo:down:longevity:down
hpo_dMST:down:foxo:down:longevity:down
Ilp:down:InR:down:Lnk_dSH2B:down:c_Pi3K:down:Akt1_PKB:down:L_PRAS40:up:c_Tor_C1:down:S6k:down:chico_IRS:up:c_Pi3K:up:Pk61C_dPDK1:up:Akt1_PKB:up:foxo:down:longevity:down
Ilp:down:InR:down:chico_IRS:down:c_Pi3K:down:Akt1_PKB:down:L_PRAS40:up:c_Tor_C1:down:S6k:down:chico_IRS:up:c_Pi3K:up:Pk61C_dPDK1:up:Akt1_PKB:up:foxo:down:longevity:down
Ilp:down:InR:down:Lnk_dSH2B:down:c_Pi3K:down:Akt1_PKB:down:c_Tsc1_2:up:Rheb:down:c_Tor_C1:down:S6k:down:chico_IRS:up:c_Pi3K:up:Pk61C_dPDK1:up:Akt1_PKB:up:foxo:down:longevity:down
Ilp:down:InR:down:chico_IRS:down:c_Pi3K:down:Akt1_PKB:down:c_Tsc1_2:up:Rheb:down:c_Tor_C1:down:S6k:down:chico_IRS:up:c_Pi3K:up:Pk61C_dPDK1:up:Akt1_PKB:up:foxo:down:longevity:down
Ilp:down:InR:down:Lnk_dSH2B:down:c_Pi3K:down:Akt1_PKB:down:L_PRAS40:up:c_Tor_C1:down:S6k:down:chico_IRS:up:c_Pi3K:up:Akt1_PKB:up:foxo:down:longevity:down
Ilp:down:InR:down:chico_IRS:down:c_Pi3K:down:Akt1_PKB:down:L_PRAS40:up:c_Tor_C1:down:S6k:down:chico_IRS:up:c_Pi3K:up:Akt1_PKB:up:foxo:down:longevity:down
Ilp:down:InR:down:Lnk_dSH2B:down:c_Pi3K:down:Akt1_PKB:down:c_Tsc1_2:up:Rheb:down:c_Tor_C1:down:S6k:down:chico_IRS:up:c_Pi3K:up:Akt1_PKB:up:foxo:down:longevity:down
Ilp:down:InR:down:chico_IRS:down:c_Pi3K:down:Akt1_PKB:down:c_Tsc1_2:up:Rheb:down:c_Tor_C1:down:S6k:down:chico_IRS:up:c_Pi3K:up:Akt1_PKB:up:foxo:down:longevity:down
ImpL2:up:Ilp:down:InR:down:Lnk_dSH2B:down:c_Pi3K:down:Akt1_PKB:down:L_PRAS40:up:c_Tor_C1:down:S6k:down:chico_IRS:up:c_Pi3K:up:Pk61C_dPDK1:up:Akt1_PKB:up:foxo:down:longevity:down
ImpL2:up:Ilp:down:InR:down:Lnk_dSH2B:down:c_Pi3K:down:Akt1_PKB:down:L_PRAS40:up:c_Tor_C1:down:S6k:down:chico_IRS:up:c_Pi3K:up:Pk61C_dPDK1:up:Akt1_PKB:up:foxo:down:longevity:down
ImpL2:up:Ilp:down:InR:down:chico_IRS:down:c_Pi3K:down:Akt1_PKB:down:L_PRAS40:up:c_Tor_C1:down:S6k:down:chico_IRS:up:c_Pi3K:up:Pk61C_dPDK1:up:Akt1_PKB:up:foxo:down:longevity:down
ImpL2:up:Ilp:down:InR:down:chico_IRS:down:c_Pi3K:down:Akt1_PKB:down:L_PRAS40:up:c_Tor_C1:down:S6k:down:chico_IRS:up:c_Pi3K:up:Pk61C_dPDK1:up:Akt1_PKB:up:foxo:down:longevity:down
ImpL2:up:Ilp:down:InR:down:Lnk_dSH2B:down:c_Pi3K:down:Akt1_PKB:down:c_Tsc1_2:up:Rheb:down:c_Tor_C1:down:S6k:down:chico_IRS:up:c_Pi3K:up:Pk61C_dPDK1:up:Akt1_PKB:up:foxo:down:longevity:down
ImpL2:up:Ilp:down:InR:down:Lnk_dSH2B:down:c_Pi3K:down:Akt1_PKB:down:c_Tsc1_2:up:Rheb:down:c_Tor_C1:down:S6k:down:chico_IRS:up:c_Pi3K:up:Pk61C_dPDK1:up:Akt1_PKB:up:foxo:down:longevity:down
ImpL2:up:Ilp:down:InR:down:chico_IRS:down:c_Pi3K:down:Akt1_PKB:down:c_Tsc1_2:up:Rheb:down:c_Tor_C1:down:S6k:down:chico_IRS:up:c_Pi3K:up:Pk61C_dPDK1:up:Akt1_PKB:up:foxo:down:longevity:down
ImpL2:up:Ilp:down:InR:down:chico_IRS:down:c_Pi3K:down:Akt1_PKB:down:c_Tsc1_2:up:Rheb:down:c_Tor_C1:down:S6k:down:chico_IRS:up:c_Pi3K:up:Pk61C_dPDK1:up:Akt1_PKB:up:foxo:down:longevity:down
ImpL2:up:Ilp:down:InR:down:Lnk_dSH2B:down:c_Pi3K:down:Akt1_PKB:down:L_PRAS40:up:c_Tor_C1:down:S6k:down:chico_IRS:up:c_Pi3K:up:Akt1_PKB:up:foxo:down:longevity:down
ImpL2:up:Ilp:down:InR:down:Lnk_dSH2B:down:c_Pi3K:down:Akt1_PKB:down:L_PRAS40:up:c_Tor_C1:down:S6k:down:chico_IRS:up:c_Pi3K:up:Akt1_PKB:up:foxo:down:longevity:down
ImpL2:up:Ilp:down:InR:down:chico_IRS:down:c_Pi3K:down:Akt1_PKB:down:L_PRAS40:up:c_Tor_C1:down:S6k:down:chico_IRS:up:c_Pi3K:up:Akt1_PKB:up:foxo:down:longevity:down
ImpL2:up:Ilp:down:InR:down:chico_IRS:down:c_Pi3K:down:Akt1_PKB:down:L_PRAS40:up:c_Tor_C1:down:S6k:down:chico_IRS:up:c_Pi3K:up:Akt1_PKB:up:foxo:down:longevity:down
ImpL2:up:Ilp:down:InR:down:Lnk_dSH2B:down:c_Pi3K:down:Akt1_PKB:down:c_Tsc1_2:up:Rheb:down:c_Tor_C1:down:S6k:down:chico_IRS:up:c_Pi3K:up:Akt1_PKB:up:foxo:down:longevity:down
ImpL2:up:Ilp:down:InR:down:Lnk_dSH2B:down:c_Pi3K:down:Akt1_PKB:down:c_Tsc1_2:up:Rheb:down:c_Tor_C1:down:S6k:down:chico_IRS:up:c_Pi3K:up:Akt1_PKB:up:foxo:down:longevity:down
ImpL2:up:Ilp:down:InR:down:chico_IRS:down:c_Pi3K:down:Akt1_PKB:down:c_Tsc1_2:up:Rheb:down:c_Tor_C1:down:S6k:down:chico_IRS:up:c_Pi3K:up:Akt1_PKB:up:foxo:down:longevity:down
ImpL2:up:Ilp:down:InR:down:chico_IRS:down:c_Pi3K:down:Akt1_PKB:down:c_Tsc1_2:up:Rheb:down:c_Tor_C1:down:S6k:down:chico_IRS:up:c_Pi3K:up:Akt1_PKB:up:foxo:down:longevity:down
Pk61C_dPDK1:up:Akt1_PKB:up:foxo:down:longevity:down
Pk61C_dPDK1:up:S6k:up:chico_IRS:down:c_Pi3K:down:Akt1_PKB:down:L_PRAS40:up:c_Tor_C1:down:S6k:down:chico_IRS:up:c_Pi3K:up:Akt1_PKB:up:foxo:down:longevity:down
Pk61C_dPDK1:up:S6k:up:chico_IRS:down:c_Pi3K:down:Akt1_PKB:down:c_Tsc1_2:up:Rheb:down:c_Tor_C1:down:S6k:down:chico_IRS:up:c_Pi3K:up:Akt1_PKB:up:foxo:down:longevity:down
Pten:down:Pk61C_dPDK1:up:Akt1_PKB:up:foxo:down:longevity:down
Pten:down:Akt1_PKB:up:foxo:down:longevity:down
Pten:down:Pk61C_dPDK1:up:S6k:up:chico_IRS:down:c_Pi3K:down:Akt1_PKB:down:L_PRAS40:up:c_Tor_C1:down:S6k:down:chico_IRS:up:c_Pi3K:up:Akt1_PKB:up:foxo:down:longevity:down
Pten:down:Pk61C_dPDK1:up:S6k:up:chico_IRS:down:c_Pi3K:down:Akt1_PKB:down:c_Tsc1_2:up:Rheb:down:c_Tor_C1:down:S6k:down:chico_IRS:up:c_Pi3K:up:Akt1_PKB:up:foxo:down:longevity:down
Sin1:down:c_Tor_C2:down:Akt1_PKB:down:c_Tsc1_2:up:Rheb:down:c_Tor_C1:down:Atg1_dUCL:down:S6k:up:chico_IRS:down:c_Pi3K:down:Akt1_PKB:down:L_PRAS40:up:c_Tor_C1:down:S6k:down:chico_IRS:up:c_Pi3K:up:Pk61C_dPDK1:up:Akt1_PKB:up:foxo:down:longevity:down
Sin1:down:c_Tor_C2:down:Akt1_PKB:down:L_PRAS40:up:c_Tor_C1:down:S6k:down:chico_IRS:up:c_Pi3K:up:Pk61C_dPDK1:up:Akt1_PKB:up:foxo:down:longevity:down
Sin1:down:c_Tor_C2:down:Akt1_PKB:down:c_Tsc1_2:up:Rheb:down:c_Tor_C1:down:S6k:down:chico_IRS:up:c_Pi3K:up:Pk61C_dPDK1:up:Akt1_PKB:up:foxo:down:longevity:down
Sin1:down:c_Tor_C2:down:Akt1_PKB:down:c_Tsc1_2:up:Rheb:down:c_Tor_C1:down:Atg1_dUCL:down:S6k:up:chico_IRS:down:c_Pi3K:down:Akt1_PKB:down:L_PRAS40:up:c_Tor_C1:down:S6k:down:chico_IRS:up:c_Pi3K:up:Akt1_PKB:up:foxo:down:longevity:down
Sin1:down:c_Tor_C2:down:Akt1_PKB:down:L_PRAS40:up:c_Tor_C1:down:S6k:down:chico_IRS:up:c_Pi3K:up:Akt1_PKB:up:foxo:down:longevity:down
Sin1:down:c_Tor_C2:down:Akt1_PKB:down:c_Tsc1_2:up:Rheb:down:c_Tor_C1:down:S6k:down:chico_IRS:up:c_Pi3K:up:Akt1_PKB:up:foxo:down:longevity:down
Tor:down:c_Tor_C2:down:Akt1_PKB:down:c_Tsc1_2:up:Rheb:down:c_Tor_C1:down:Atg1_dUCL:down:S6k:up:chico_IRS:down:c_Pi3K:down:Akt1_PKB:down:L_PRAS40:up:c_Tor_C1:down:S6k:down:chico_IRS:up:c_Pi3K:up:Pk61C_dPDK1:up:Akt1_PKB:up:foxo:down:longevity:down
Tor:down:c_Tor_C1:down:Atg1_dUCL:down:S6k:up:chico_IRS:down:c_Pi3K:down:Akt1_PKB:down:L_PRAS40:up:c_Tor_C1:down:S6k:down:chico_IRS:up:c_Pi3K:up:Pk61C_dPDK1:up:Akt1_PKB:up:foxo:down:longevity:down
Tor:down:c_Tor_C2:down:Akt1_PKB:down:L_PRAS40:up:c_Tor_C1:down:S6k:down:chico_IRS:up:c_Pi3K:up:Pk61C_dPDK1:up:Akt1_PKB:up:foxo:down:longevity:down
Tor:down:c_Tor_C1:down:Atg1_dUCL:down:S6k:up:chico_IRS:down:c_Pi3K:down:Akt1_PKB:down:c_Tsc1_2:up:Rheb:down:c_Tor_C1:down:S6k:down:chico_IRS:up:c_Pi3K:up:Pk61C_dPDK1:up:Akt1_PKB:up:foxo:down:longevity:down
Tor:down:c_Tor_C2:down:Akt1_PKB:down:c_Tsc1_2:up:Rheb:down:c_Tor_C1:down:S6k:down:chico_IRS:up:c_Pi3K:up:Pk61C_dPDK1:up:Akt1_PKB:up:foxo:down:longevity:down
Tor:down:c_Tor_C1:down:S6k:down:chico_IRS:up:c_Pi3K:up:Pk61C_dPDK1:up:Akt1_PKB:up:foxo:down:longevity:down
Tor:down:c_Tor_C2:down:Akt1_PKB:down:c_Tsc1_2:up:Rheb:down:c_Tor_C1:down:Atg1_dUCL:down:S6k:up:chico_IRS:down:c_Pi3K:down:Akt1_PKB:down:L_PRAS40:up:c_Tor_C1:down:S6k:down:chico_IRS:up:c_Pi3K:up:Akt1_PKB:up:foxo:down:longevity:down
Tor:down:c_Tor_C1:down:Atg1_dUCL:down:S6k:up:chico_IRS:down:c_Pi3K:down:Akt1_PKB:down:L_PRAS40:up:c_Tor_C1:down:S6k:down:chico_IRS:up:c_Pi3K:up:Akt1_PKB:up:foxo:down:longevity:down
Tor:down:c_Tor_C2:down:Akt1_PKB:down:L_PRAS40:up:c_Tor_C1:down:S6k:down:chico_IRS:up:c_Pi3K:up:Akt1_PKB:up:foxo:down:longevity:down
Tor:down:c_Tor_C1:down:Atg1_dUCL:down:S6k:up:chico_IRS:down:c_Pi3K:down:Akt1_PKB:down:c_Tsc1_2:up:Rheb:down:c_Tor_C1:down:S6k:down:chico_IRS:up:c_Pi3K:up:Akt1_PKB:up:foxo:down:longevity:down
Tor:down:c_Tor_C2:down:Akt1_PKB:down:c_Tsc1_2:up:Rheb:down:c_Tor_C1:down:S6k:down:chico_IRS:up:c_Pi3K:up:Akt1_PKB:up:foxo:down:longevity:down
Tor:down:c_Tor_C1:down:S6k:down:chico_IRS:up:c_Pi3K:up:Akt1_PKB:up:foxo:down:longevity:down
