# Supplementary material for: Using Answer Set Programming to Integrate RNA Expression with Signalling Pathway Information to Infer How Mutations Affect Ageing
Source: PLoS One. 2012 Dec 10;7(12):e50881. doi: 10.1371/journal.pone.0050881 (PMC3519537; doi:10.1371/journal.pone.0050881)
Supplement: Supplementary File S3 — The longest common sub-paths per experiment. (XLS) [file pone.0050881.s003.xls]

## Sheet: chico Longest Common Sub-paths
Sub-path	Count
Akt1_PKB:d	219
S6k:u:chico_IRS:d:c_Pi3K:d:Akt1_PKB:d	72
Akt1_PKB:u	249
Akt1_PKB:d:L_PRAS40:u:c_Tor_C1:d	54
Akt1_PKB:u:foxo:d:longevity:d	36
S6k:u:chico_IRS:d:c_Pi3K:d:Pk61C_dPDK1:d:Akt1_PKB:d	144
S6k:u:chico_IRS:d:c_Pi3K:d:Pk61C_dPDK1:d:Akt1_PKB:d:foxo:u:longevity:u	54
Akt1_PKB:d:foxo:u:longevity:u	12
Akt1_PKB:d:c_Tsc1_2:u:Rheb:d:c_Tor_C1:d	198
S6k:u:chico_IRS:d:c_Pi3K:d:Akt1_PKB:d:foxo:u:longevity:u	45

## Sheet: Lnk Longest Common Sub-paths
Sub-path	Count
Akt1_PKB:d	309
S6k:d:chico_IRS:u:c_Pi3K:u:Pk61C_dPDK1:u:Akt1_PKB:u:foxo:d:longevity:d	15
Akt1_PKB:d:L_PRAS40:u:c_Tor_C1:d:c_Tor_C2:u:Akt1_PKB:u:foxo:d:longevity:d	8
Akt1_PKB:d:L_PRAS40:u:c_Tor_C1:d:c_Tor_C2:u:Akt1_PKB:u	49
Akt1_PKB:d:L_PRAS40:u:c_Tor_C1:d:S6k:d:chico_IRS:u:c_Pi3K:u:Akt1_PKB:u:foxo:d:longevity:d	8
S6k:d:chico_IRS:u:c_Pi3K:u	75
Akt1_PKB:u	857
Akt1_PKB:d:L_PRAS40:u:c_Tor_C1:d	76
Akt1_PKB:d:c_Tsc1_2:u:Rheb:d:c_Tor_C1:d:c_Tor_C2:u:Akt1_PKB:u:L_PRAS40:d:c_Tor_C1:u:Atg1_dUCL:u:S6k:d:chico_IRS:u:c_Pi3K:u:Pk61C_dPDK1:u:Akt1_PKB:u:foxo:d:longevity:d	4
S6k:d:chico_IRS:u:c_Pi3K:u:Pk61C_dPDK1:u:Akt1_PKB:u	28
S6k:d:chico_IRS:u:c_Pi3K:u:Akt1_PKB:u:foxo:d:longevity:d	12
Akt1_PKB:d:L_PRAS40:u:c_Tor_C1:d:S6k:d:chico_IRS:u:c_Pi3K:u:Pk61C_dPDK1:u:Akt1_PKB:u:foxo:d:longevity:d	8
Akt1_PKB:d:c_Tsc1_2:u:Rheb:d:c_Tor_C1:d:c_Tor_C2:u:Akt1_PKB:u:L_PRAS40:d:c_Tor_C1:u:Atg1_dUCL:u:S6k:d:chico_IRS:u:c_Pi3K:u:Akt1_PKB:u:foxo:d:longevity:d	4
Akt1_PKB:d:L_PRAS40:u:c_Tor_C1:d:c_Tor_C2:u:Akt1_PKB:u:L_PRAS40:d:c_Tor_C1:u:Atg1_dUCL:u:S6k:d:chico_IRS:u:c_Pi3K:u:Akt1_PKB:u:foxo:d:longevity:d	4
Akt1_PKB:d:c_Tsc1_2:u:Rheb:d:c_Tor_C1:d:c_Tor_C2:u:Akt1_PKB:u:L_PRAS40:d:c_Tor_C1:u:Atg1_dUCL:u:S6k:d:chico_IRS:u:c_Pi3K:u	8
Akt1_PKB:d:c_Tsc1_2:u:Rheb:d:c_Tor_C1:d:c_Tor_C2:u:Akt1_PKB:u:foxo:d:longevity:d	8
Akt1_PKB:d:c_Tsc1_2:u:Rheb:d:c_Tor_C1:d	91
S6k:d:chico_IRS:u:c_Pi3K:u:Akt1_PKB:u	24
Akt1_PKB:u:c_Tsc1_2:d:Rheb:u:c_Tor_C1:u	280
Akt1_PKB:d:L_PRAS40:u:c_Tor_C1:d:S6k:d:chico_IRS:u:c_Pi3K:u	16
Akt1_PKB:d:L_PRAS40:u:c_Tor_C1:d:c_Tor_C2:u:Akt1_PKB:u:L_PRAS40:d:c_Tor_C1:u:Atg1_dUCL:u:S6k:d:chico_IRS:u:c_Pi3K:u	8
Akt1_PKB:d:c_Tsc1_2:u:Rheb:d:c_Tor_C1:d:S6k:d:chico_IRS:u:c_Pi3K:u:Akt1_PKB:u:foxo:d:longevity:d	8
Akt1_PKB:d:c_Tsc1_2:u:Rheb:d:c_Tor_C1:d:c_Tor_C2:u:Akt1_PKB:u	51
Akt1_PKB:u:foxo:d:longevity:d	238
Akt1_PKB:d:c_Tsc1_2:u:Rheb:d:c_Tor_C1:d:S6k:d:chico_IRS:u:c_Pi3K:u:Pk61C_dPDK1:u:Akt1_PKB:u:foxo:d:longevity:d	8
Akt1_PKB:d:foxo:u:longevity:u	23
Akt1_PKB:u:L_PRAS40:d:c_Tor_C1:u	329
Akt1_PKB:d:c_Tsc1_2:u:Rheb:d:c_Tor_C1:d:S6k:d:chico_IRS:u:c_Pi3K:u	16
Akt1_PKB:d:L_PRAS40:u:c_Tor_C1:d:c_Tor_C2:u:Akt1_PKB:u:L_PRAS40:d:c_Tor_C1:u:Atg1_dUCL:u:S6k:d:chico_IRS:u:c_Pi3K:u:Pk61C_dPDK1:u:Akt1_PKB:u:foxo:d:longevity:d	4

## Sheet: InR Longest Common Sub-paths
Sub-path	Count
c_Pi3K:d:Pk61C_dPDK1:d:S6k:d:chico_IRS:u:c_Pi3K:u:Akt1_PKB:u	14
c_Pi3K:d:Pk61C_dPDK1:d:Akt1_PKB:d:L_PRAS40:u:c_Tor_C1:d:S6k:d:chico_IRS:u:c_Pi3K:u:Pk61C_dPDK1:u:Akt1_PKB:u:foxo:d:longevity:d	4
c_Pi3K:d:Akt1_PKB:d:L_PRAS40:u:c_Tor_C1:d:c_Tor_C2:u:Akt1_PKB:u	16
Akt1_PKB:u	79
Akt1_PKB:u:c_Tsc1_2:d:Rheb:u:c_Tor_C1:u:S6k:u:chico_IRS:d:c_Pi3K:d:Akt1_PKB:d:foxo:u:longevity:u	4
Akt1_PKB:u:c_Tsc1_2:d:Rheb:u:c_Tor_C1:u:S6k:u:chico_IRS:d:c_Pi3K:d:Pk61C_dPDK1:d:Akt1_PKB:d:foxo:u:longevity:u	4
c_Pi3K:d:Akt1_PKB:d:foxo:u:longevity:u	8
c_Pi3K:d:Pk61C_dPDK1:d:Akt1_PKB:d	247
c_Pi3K:d:Pk61C_dPDK1:d:Akt1_PKB:d:c_Tsc1_2:u:Rheb:d:c_Tor_C1:d:c_Tor_C2:u:Akt1_PKB:u:c_Tsc1_2:d:Rheb:u:c_Tor_C1:u:Atg1_dUCL:u:S6k:d:chico_IRS:u:c_Pi3K:u:Akt1_PKB:u:foxo:d:longevity:d	4
c_Pi3K:d:Akt1_PKB:d:L_PRAS40:u:c_Tor_C1:d:S6k:d:chico_IRS:u:c_Pi3K:u:Pk61C_dPDK1:u:Akt1_PKB:u:foxo:d:longevity:d	4
S6k:d:chico_IRS:u:c_Pi3K:u:Akt1_PKB:u:c_Tsc1_2:d:Rheb:u:c_Tor_C1:u	16
S6k:d:chico_IRS:u:c_Pi3K:u:Pk61C_dPDK1:u:Akt1_PKB:u	125
c_Pi3K:d:Pk61C_dPDK1:d:Akt1_PKB:d:c_Tsc1_2:u:Rheb:d:c_Tor_C1:d:S6k:d:chico_IRS:u:c_Pi3K:u	8
c_Pi3K:d:Akt1_PKB:d:L_PRAS40:u:c_Tor_C1:d:S6k:d:chico_IRS:u:c_Pi3K:u	8
S6k:d:chico_IRS:u:c_Pi3K:u:Akt1_PKB:u:foxo:d:longevity:d	103
c_Pi3K:d:Akt1_PKB:d:c_Tsc1_2:u:Rheb:d:c_Tor_C1:d:S6k:d:chico_IRS:u:c_Pi3K:u	8
c_Pi3K:d:Pk61C_dPDK1:d	196
c_Pi3K:d:Pk61C_dPDK1:d:Akt1_PKB:d:c_Tsc1_2:u:Rheb:d:c_Tor_C1:d:c_Tor_C2:u:Akt1_PKB:u:foxo:d:longevity:d	4
S6k:u:chico_IRS:d:c_Pi3K:d:Pk61C_dPDK1:d	4
c_Pi3K:d:Pk61C_dPDK1:d:S6k:d:chico_IRS:u:c_Pi3K:u:Akt1_PKB:u:foxo:d:longevity:d	7
c_Pi3K:d:Akt1_PKB:d:c_Tsc1_2:u:Rheb:d:c_Tor_C1:d:S6k:d:chico_IRS:u:c_Pi3K:u:Akt1_PKB:u:foxo:d:longevity:d	4
chico_IRS:d:c_Pi3K:d:Pk61C_dPDK1:d:Akt1_PKB:d:foxo:u:longevity:u	8
c_Pi3K:d:Pk61C_dPDK1:d:Akt1_PKB:d:L_PRAS40:u:c_Tor_C1:d:c_Tor_C2:u:Akt1_PKB:u:c_Tsc1_2:d:Rheb:u:c_Tor_C1:u:Atg1_dUCL:u:S6k:d:chico_IRS:u:c_Pi3K:u:Akt1_PKB:u:foxo:d:longevity:d	4
Akt1_PKB:d:foxo:u:longevity:u	19
c_Pi3K:d:Pk61C_dPDK1:d:Akt1_PKB:d:L_PRAS40:u:c_Tor_C1:d:c_Tor_C2:u:Akt1_PKB:u:c_Tsc1_2:d:Rheb:u:c_Tor_C1:u:Atg1_dUCL:u:S6k:d:chico_IRS:u:c_Pi3K:u:Pk61C_dPDK1:u:Akt1_PKB:u:foxo:d:longevity:d	4
chico_IRS:d:c_Pi3K:d:Pk61C_dPDK1:d:S6k:d:chico_IRS:u:c_Pi3K:u:Akt1_PKB:u:foxo:d:longevity:d	4
c_Pi3K:d:Pk61C_dPDK1:d:Akt1_PKB:d:c_Tsc1_2:u:Rheb:d:c_Tor_C1:d:c_Tor_C2:u:Akt1_PKB:u:c_Tsc1_2:d:Rheb:u:c_Tor_C1:u:Atg1_dUCL:u:S6k:d:chico_IRS:u:c_Pi3K:u	8
S6k:d:chico_IRS:u:c_Pi3K:u:Pk61C_dPDK1:u:Akt1_PKB:u:c_Tsc1_2:d:Rheb:u:c_Tor_C1:u	16
c_Pi3K:d	363
c_Pi3K:d:Akt1_PKB:d:L_PRAS40:u:c_Tor_C1:d	46
c_Pi3K:d:Akt1_PKB:d:L_PRAS40:u:c_Tor_C1:d:S6k:d:chico_IRS:u:c_Pi3K:u:Akt1_PKB:u:foxo:d:longevity:d	4
S6k:u:chico_IRS:d:c_Pi3K:d:Pk61C_dPDK1:d:Akt1_PKB:d:foxo:u:longevity:u	7
c_Pi3K:d:Pk61C_dPDK1:d:Akt1_PKB:d:c_Tsc1_2:u:Rheb:d:c_Tor_C1:d:S6k:d:chico_IRS:u:c_Pi3K:u:Pk61C_dPDK1:u:Akt1_PKB:u:foxo:d:longevity:d	4
c_Pi3K:d:Pk61C_dPDK1:d:Akt1_PKB:d:L_PRAS40:u:c_Tor_C1:d:c_Tor_C2:u:Akt1_PKB:u:c_Tsc1_2:d:Rheb:u:c_Tor_C1:u:Atg1_dUCL:u:S6k:d:chico_IRS:u:c_Pi3K:u	8
c_Pi3K:d:Akt1_PKB:d:L_PRAS40:u:c_Tor_C1:d:c_Tor_C2:u:Akt1_PKB:u:foxo:d:longevity:d	4
c_Pi3K:d:Pk61C_dPDK1:d:Akt1_PKB:d:c_Tsc1_2:u:Rheb:d:c_Tor_C1:d:c_Tor_C2:u:Akt1_PKB:u	16
c_Pi3K:d:Pk61C_dPDK1:d:Akt1_PKB:d:foxo:u:longevity:u	8
chico_IRS:d:c_Pi3K:d:Pk61C_dPDK1:d:S6k:d:chico_IRS:u:c_Pi3K:u:Pk61C_dPDK1:u:Akt1_PKB:u:foxo:d:longevity:d	4
c_Pi3K:d:Akt1_PKB:d:L_PRAS40:u:c_Tor_C1:d:c_Tor_C2:u:Akt1_PKB:u:c_Tsc1_2:d:Rheb:u:c_Tor_C1:u:Atg1_dUCL:u:S6k:d:chico_IRS:u:c_Pi3K:u	8
chico_IRS:d:c_Pi3K:d:Pk61C_dPDK1:d:S6k:d:chico_IRS:u:c_Pi3K:u:Pk61C_dPDK1:u:Akt1_PKB:u	6
c_Pi3K:d:Pk61C_dPDK1:d:S6k:d:chico_IRS:u:c_Pi3K:u:Pk61C_dPDK1:u:Akt1_PKB:u	14
c_Pi3K:d:Pk61C_dPDK1:d:S6k:d:chico_IRS:u:c_Pi3K:u:Pk61C_dPDK1:u:Akt1_PKB:u:foxo:d:longevity:d	8
c_Pi3K:d:Akt1_PKB:d:c_Tsc1_2:u:Rheb:d:c_Tor_C1:d:c_Tor_C2:u:Akt1_PKB:u:foxo:d:longevity:d	4
S6k:d:chico_IRS:u:c_Pi3K:u:Pk61C_dPDK1:u:Akt1_PKB:u:c_Tsc1_2:d:Rheb:u:c_Tor_C1:u:c_Tor_C2:d:Akt1_PKB:d:foxo:u:longevity:u	8
Akt1_PKB:u:foxo:d:longevity:d	167
chico_IRS:d:c_Pi3K:d:Pk61C_dPDK1:d:S6k:d:chico_IRS:u:c_Pi3K:u:Akt1_PKB:u:c_Tsc1_2:d:Rheb:u:c_Tor_C1:u:c_Tor_C2:d:Akt1_PKB:d:foxo:u:longevity:u	2
S6k:d:chico_IRS:u:c_Pi3K:u:Pk61C_dPDK1:u:Akt1_PKB:u:foxo:d:longevity:d	117
S6k:d:chico_IRS:u:c_Pi3K:u:Pk61C_dPDK1:u	33
S6k:d:chico_IRS:u:c_Pi3K:u	452
c_Pi3K:d:Akt1_PKB:d	179
chico_IRS:d:c_Pi3K:d:Pk61C_dPDK1:d:Akt1_PKB:d	80
c_Pi3K:d:Pk61C_dPDK1:d:S6k:d:chico_IRS:u:c_Pi3K:u:Akt1_PKB:u:c_Tsc1_2:d:Rheb:u:c_Tor_C1:u:c_Tor_C2:d:Akt1_PKB:d:foxo:u:longevity:u	6
Akt1_PKB:u:c_Tsc1_2:d:Rheb:u:c_Tor_C1:u:S6k:u:chico_IRS:d:c_Pi3K:d	16
chico_IRS:d:c_Pi3K:d:Pk61C_dPDK1:d:S6k:d:chico_IRS:u:c_Pi3K:u	21
c_Pi3K:d:Pk61C_dPDK1:d:Akt1_PKB:d:c_Tsc1_2:u:Rheb:d:c_Tor_C1:d	48
chico_IRS:d:c_Pi3K:d	151
c_Pi3K:d:Akt1_PKB:d:c_Tsc1_2:u:Rheb:d:c_Tor_C1:d:c_Tor_C2:u:Akt1_PKB:u	16
c_Pi3K:d:Akt1_PKB:d:L_PRAS40:u:c_Tor_C1:d:c_Tor_C2:u:Akt1_PKB:u:c_Tsc1_2:d:Rheb:u:c_Tor_C1:u:Atg1_dUCL:u:S6k:d:chico_IRS:u:c_Pi3K:u:Pk61C_dPDK1:u:Akt1_PKB:u:foxo:d:longevity:d	4
c_Pi3K:d:Akt1_PKB:d:c_Tsc1_2:u:Rheb:d:c_Tor_C1:d:S6k:d:chico_IRS:u:c_Pi3K:u:Pk61C_dPDK1:u:Akt1_PKB:u:foxo:d:longevity:d	4
chico_IRS:d:c_Pi3K:d:Akt1_PKB:d:foxo:u:longevity:u	6
c_Pi3K:d:Pk61C_dPDK1:d:Akt1_PKB:d:c_Tsc1_2:u:Rheb:d:c_Tor_C1:d:S6k:d:chico_IRS:u:c_Pi3K:u:Akt1_PKB:u:foxo:d:longevity:d	4
c_Pi3K:d:Pk61C_dPDK1:d:S6k:d:chico_IRS:u:c_Pi3K:u	45
chico_IRS:d:c_Pi3K:d:Pk61C_dPDK1:d:S6k:d:chico_IRS:u:c_Pi3K:u:Pk61C_dPDK1:u:Akt1_PKB:u:c_Tsc1_2:d:Rheb:u:c_Tor_C1:u:c_Tor_C2:d:Akt1_PKB:d:foxo:u:longevity:u	2
c_Pi3K:d:Pk61C_dPDK1:d:Akt1_PKB:d:L_PRAS40:u:c_Tor_C1:d:S6k:d:chico_IRS:u:c_Pi3K:u	8
Akt1_PKB:d	30
S6k:u:chico_IRS:d:c_Pi3K:d	7
c_Pi3K:d:Pk61C_dPDK1:d:Akt1_PKB:d:c_Tsc1_2:u:Rheb:d:c_Tor_C1:d:c_Tor_C2:u:Akt1_PKB:u:c_Tsc1_2:d:Rheb:u:c_Tor_C1:u:Atg1_dUCL:u:S6k:d:chico_IRS:u:c_Pi3K:u:Pk61C_dPDK1:u:Akt1_PKB:u:foxo:d:longevity:d	4
c_Pi3K:d:Akt1_PKB:d:c_Tsc1_2:u:Rheb:d:c_Tor_C1:d:c_Tor_C2:u:Akt1_PKB:u:c_Tsc1_2:d:Rheb:u:c_Tor_C1:u:Atg1_dUCL:u:S6k:d:chico_IRS:u:c_Pi3K:u	8
c_Pi3K:d:Pk61C_dPDK1:d:S6k:d:chico_IRS:u:c_Pi3K:u:Pk61C_dPDK1:u:Akt1_PKB:u:c_Tsc1_2:d:Rheb:u:c_Tor_C1:u:c_Tor_C2:d:Akt1_PKB:d:foxo:u:longevity:u	6
c_Pi3K:d:Pk61C_dPDK1:d:Akt1_PKB:d:L_PRAS40:u:c_Tor_C1:d:c_Tor_C2:u:Akt1_PKB:u:foxo:d:longevity:d	4
S6k:u:chico_IRS:d:c_Pi3K:d:Akt1_PKB:d:foxo:u:longevity:u	5
c_Pi3K:d:Akt1_PKB:d:c_Tsc1_2:u:Rheb:d:c_Tor_C1:d	47
c_Pi3K:d:Akt1_PKB:d:c_Tsc1_2:u:Rheb:d:c_Tor_C1:d:c_Tor_C2:u:Akt1_PKB:u:c_Tsc1_2:d:Rheb:u:c_Tor_C1:u:Atg1_dUCL:u:S6k:d:chico_IRS:u:c_Pi3K:u:Akt1_PKB:u:foxo:d:longevity:d	4
S6k:d:chico_IRS:u:c_Pi3K:u:Akt1_PKB:u	119
S6k:d:chico_IRS:u:c_Pi3K:u:Akt1_PKB:u:c_Tsc1_2:d:Rheb:u:c_Tor_C1:u:c_Tor_C2:d:Akt1_PKB:d:foxo:u:longevity:u	8
Akt1_PKB:u:c_Tsc1_2:d:Rheb:u:c_Tor_C1:u	692
c_Pi3K:d:Pk61C_dPDK1:d:Akt1_PKB:d:L_PRAS40:u:c_Tor_C1:d	47
c_Pi3K:d:Akt1_PKB:d:c_Tsc1_2:u:Rheb:d:c_Tor_C1:d:c_Tor_C2:u:Akt1_PKB:u:c_Tsc1_2:d:Rheb:u:c_Tor_C1:u:Atg1_dUCL:u:S6k:d:chico_IRS:u:c_Pi3K:u:Pk61C_dPDK1:u:Akt1_PKB:u:foxo:d:longevity:d	4
chico_IRS:d:c_Pi3K:d:Pk61C_dPDK1:d	62
c_Pi3K:d:Akt1_PKB:d:L_PRAS40:u:c_Tor_C1:d:c_Tor_C2:u:Akt1_PKB:u:c_Tsc1_2:d:Rheb:u:c_Tor_C1:u:Atg1_dUCL:u:S6k:d:chico_IRS:u:c_Pi3K:u:Akt1_PKB:u:foxo:d:longevity:d	4
Akt1_PKB:u:c_Tsc1_2:d:Rheb:u:c_Tor_C1:u:c_Tor_C2:d:Akt1_PKB:d:foxo:u:longevity:u	18
chico_IRS:d:c_Pi3K:d:Akt1_PKB:d	52
c_Pi3K:d:Pk61C_dPDK1:d:Akt1_PKB:d:L_PRAS40:u:c_Tor_C1:d:S6k:d:chico_IRS:u:c_Pi3K:u:Akt1_PKB:u:foxo:d:longevity:d	4
c_Pi3K:d:Pk61C_dPDK1:d:Akt1_PKB:d:L_PRAS40:u:c_Tor_C1:d:c_Tor_C2:u:Akt1_PKB:u	16
chico_IRS:d:c_Pi3K:d:Pk61C_dPDK1:d:S6k:d:chico_IRS:u:c_Pi3K:u:Akt1_PKB:u	6
Akt1_PKB:u:c_Tsc1_2:d:Rheb:u:c_Tor_C1:u:S6k:u:chico_IRS:d:c_Pi3K:d:Pk61C_dPDK1:d	8

## Sheet: foxo Longest Common Sub-paths
Sub-path	Count
c_Tor_C2:d:Akt1_PKB:d:c_Tsc1_2:u:Rheb:d:c_Tor_C1:d:S6k:d:chico_IRS:u:c_Pi3K:u:Pk61C_dPDK1:u:Akt1_PKB:u:foxo:d:longevity:d	2
c_Tor_C1:d:Atg1_dUCL:d:S6k:u:chico_IRS:d:c_Pi3K:d:Akt1_PKB:d:L_PRAS40:u:c_Tor_C1:d:S6k:d:chico_IRS:u:c_Pi3K:u	8
c_Tor_C2:d:Akt1_PKB:d:L_PRAS40:u:c_Tor_C1:d:S6k:d:chico_IRS:u:c_Pi3K:u:Akt1_PKB:u:foxo:d:longevity:d	2
c_Tor_C1:d:Atg1_dUCL:d:S6k:u:chico_IRS:d:c_Pi3K:d:Akt1_PKB:d	12
c_Tor_C1:d	16
c_Tor_C2:d:Akt1_PKB:d	8
Akt1_PKB:d:L_PRAS40:u:c_Tor_C1:d:S6k:d:chico_IRS:u:c_Pi3K:u:Akt1_PKB:u:foxo:d:longevity:d	40
c_Pi3K:d:Akt1_PKB:d:L_PRAS40:u:c_Tor_C1:d:S6k:d:chico_IRS:u:c_Pi3K:u:Pk61C_dPDK1:u:Akt1_PKB:u:foxo:d:longevity:d	36
c_Tor_C2:d:Akt1_PKB:d:c_Tsc1_2:u:Rheb:d:c_Tor_C1:d:Atg1_dUCL:d:S6k:u:chico_IRS:d:c_Pi3K:d:Akt1_PKB:d:L_PRAS40:u:c_Tor_C1:d:S6k:d:chico_IRS:u:c_Pi3K:u:Pk61C_dPDK1:u:Akt1_PKB:u:foxo:d:longevity:d	2
c_Pi3K:d:Akt1_PKB:d:L_PRAS40:u:c_Tor_C1:d:S6k:d:chico_IRS:u:c_Pi3K:u	84
Akt1_PKB:d:L_PRAS40:u:c_Tor_C1:d:S6k:d:chico_IRS:u:c_Pi3K:u:Pk61C_dPDK1:u:Akt1_PKB:u:foxo:d:longevity:d	32
c_Pi3K:d:Akt1_PKB:d:L_PRAS40:u:c_Tor_C1:d:S6k:d:chico_IRS:u:c_Pi3K:u:Akt1_PKB:u:foxo:d:longevity:d	48
c_Pi3K:d:Akt1_PKB:d:c_Tsc1_2:u:Rheb:d:c_Tor_C1:d:S6k:d:chico_IRS:u:c_Pi3K:u	60
Akt1_PKB:d:c_Tsc1_2:u:Rheb:d:c_Tor_C1:d	84
c_Tor_C1:d:Atg1_dUCL:d:S6k:u:chico_IRS:d:c_Pi3K:d:Akt1_PKB:d:L_PRAS40:u:c_Tor_C1:d:S6k:d:chico_IRS:u:c_Pi3K:u:Akt1_PKB:u:foxo:d:longevity:d	4
c_Tor_C2:d:Akt1_PKB:d:c_Tsc1_2:u:Rheb:d:c_Tor_C1:d:Atg1_dUCL:d:S6k:u:chico_IRS:d:c_Pi3K:d:Akt1_PKB:d:L_PRAS40:u:c_Tor_C1:d:S6k:d:chico_IRS:u:c_Pi3K:u:Akt1_PKB:u:foxo:d:longevity:d	2
c_Tor_C2:d:Akt1_PKB:d:c_Tsc1_2:u:Rheb:d:c_Tor_C1:d:S6k:d:chico_IRS:u:c_Pi3K:u	4
c_Tor_C2:d:Akt1_PKB:d:L_PRAS40:u:c_Tor_C1:d:S6k:d:chico_IRS:u:c_Pi3K:u:Pk61C_dPDK1:u:Akt1_PKB:u:foxo:d:longevity:d	2
c_Pi3K:d:Akt1_PKB:d:c_Tsc1_2:u:Rheb:d:c_Tor_C1:d:S6k:d:chico_IRS:u:c_Pi3K:u:Pk61C_dPDK1:u:Akt1_PKB:u:foxo:d:longevity:d	24
c_Tor_C1:d:S6k:d:chico_IRS:u:c_Pi3K:u:Akt1_PKB:u:foxo:d:longevity:d	16
c_Tor_C2:d:Akt1_PKB:d:c_Tsc1_2:u:Rheb:d:c_Tor_C1:d:S6k:d:chico_IRS:u:c_Pi3K:u:Akt1_PKB:u:foxo:d:longevity:d	2
c_Tor_C2:d:Akt1_PKB:d:c_Tsc1_2:u:Rheb:d:c_Tor_C1:d	16
Akt1_PKB:d:L_PRAS40:u:c_Tor_C1:d:S6k:d:chico_IRS:u:c_Pi3K:u	72
c_Tor_C1:d:S6k:d:chico_IRS:u:c_Pi3K:u	34
Akt1_PKB:d:c_Tsc1_2:u:Rheb:d:c_Tor_C1:d:S6k:d:chico_IRS:u:c_Pi3K:u:Akt1_PKB:u:foxo:d:longevity:d	36
c_Tor_C2:d:Akt1_PKB:d:L_PRAS40:u:c_Tor_C1:d:S6k:d:chico_IRS:u:c_Pi3K:u	4
c_Pi3K:d:Akt1_PKB:d:c_Tsc1_2:u:Rheb:d:c_Tor_C1:d:S6k:d:chico_IRS:u:c_Pi3K:u:Akt1_PKB:u:foxo:d:longevity:d	36
c_Tor_C2:d:Akt1_PKB:d:c_Tsc1_2:u:Rheb:d:c_Tor_C1:d:Atg1_dUCL:d:S6k:u:chico_IRS:d:c_Pi3K:d:Akt1_PKB:d:L_PRAS40:u:c_Tor_C1:d:S6k:d:chico_IRS:u:c_Pi3K:u	4
c_Tor_C1:d:S6k:d:chico_IRS:u:c_Pi3K:u:Pk61C_dPDK1:u:Akt1_PKB:u:foxo:d:longevity:d	17
Akt1_PKB:d:c_Tsc1_2:u:Rheb:d:c_Tor_C1:d:S6k:d:chico_IRS:u:c_Pi3K:u:Pk61C_dPDK1:u:Akt1_PKB:u:foxo:d:longevity:d	28
c_Tor_C1:d:Atg1_dUCL:d:S6k:u:chico_IRS:d:c_Pi3K:d:Akt1_PKB:d:L_PRAS40:u:c_Tor_C1:d:S6k:d:chico_IRS:u:c_Pi3K:u:Pk61C_dPDK1:u:Akt1_PKB:u:foxo:d:longevity:d	4
Akt1_PKB:d:c_Tsc1_2:u:Rheb:d:c_Tor_C1:d:S6k:d:chico_IRS:u:c_Pi3K:u	64
