# Supplementary material for: Using Answer Set Programming to Integrate RNA Expression with Signalling Pathway Information to Infer How Mutations Affect Ageing
Source: PLoS One. 2012 Dec 10;7(12):e50881. doi: 10.1371/journal.pone.0050881 (PMC3519537; doi:10.1371/journal.pone.0050881)
Supplement: Supplementary File S4 — Analysed microarray data sets (LIMMA output). (XLS) [file pone.0050881.s004.xls]

## Sheet: chico Gene Expression
ID	logFC	AveExpr	t	P.Value	adj.P.Val	B	symbol
FBgn0051664	0.572616	6.95466	19.9802	3.5043e-10	4.42173e-06	13.3452	CG31664
FBgn0002354	0.441666	10.2872	16.1899	3.51597e-09	8.2311e-06	11.4258	l(3)87Df
FBgn0034629	0.955621	10.3819	17.5802	1.43029e-09	8.2311e-06	12.1957	Acox57D-d
FBgn0039232	-1.22867	8.32124	-16.0312	3.91398e-09	8.2311e-06	11.3324	CG13636
FBgn0039431	-0.510735	7.88501	-16.2964	3.27374e-09	8.2311e-06	11.4878	CG6490
FBgn0040732	0.878122	11.7099	16.4629	2.93059e-09	8.2311e-06	11.5837	CG16926
FBgn0032726	1.91712	9.05919	15.1817	7.06699e-09	1.27388e-05	10.8115	CG10621
FBgn0003961	0.868292	10.398	14.6951	1.00511e-08	1.5853e-05	10.4964	Uro
FBgn0032216	-0.654481	10.6039	-13.9517	1.75811e-08	2.21838e-05	9.98951	CG5384
FBgn0034788	-0.993683	6.96384	-13.9923	1.70405e-08	2.21838e-05	10.018	CG13532
FBgn0250836	1.59476	9.0044	13.4565	2.59032e-08	2.97133e-05	9.63367	CG8628
FBgn0261382	0.927967	7.58121	12.5031	5.66872e-08	3.71384e-05	8.90409	Bc
FBgn0261362	0.927967	7.58121	12.5031	5.66872e-08	3.71384e-05	8.90409	proPO-A1
FBgn0261374	0.927967	7.58121	12.5031	5.66872e-08	3.71384e-05	8.90409	Phox
FBgn0017448	-0.82891	9.32792	-12.5538	5.43037e-08	3.71384e-05	8.94445	CG2187
FBgn0030666	-0.682213	7.3611	-12.616	5.15269e-08	3.71384e-05	8.99372	CG12708
FBgn0031942	0.704979	8.44708	12.4587	5.88657e-08	3.71384e-05	8.86863	CG7203
FBgn0033051	-0.693721	7.87169	-12.6014	5.21639e-08	3.71384e-05	8.98219	dream
FBgn0036948	1.93493	9.3271	12.9734	3.82757e-08	3.71384e-05	9.27163	CG7298
FBgn0040370	0.75209	6.68802	12.4981	5.69274e-08	3.71384e-05	8.90012	CG13375
FBgn0042201	1.17664	8.80262	12.9803	3.80591e-08	3.71384e-05	9.27692	Nplp3
FBgn0050359	-0.517097	10.6016	-12.7611	4.56299e-08	3.71384e-05	9.10757	CG30359
FBgn0019830	0.522658	10.8602	12.2589	6.98651e-08	3.86441e-05	8.70716	colt
FBgn0030362	1.07432	8.79033	12.1927	7.39835e-08	3.86441e-05	8.65304	regucalcin
FBgn0030484	0.749235	9.91952	12.1533	7.65654e-08	3.86441e-05	8.6206	CG1681
FBgn0039471	1.72494	9.73512	12.2558	7.00516e-08	3.86441e-05	8.70464	CG6295
FBgn0050083	1.12748	7.18457	12.2174	7.24195e-08	3.86441e-05	8.67324	CG30083
FBgn0039472	1.27643	8.84581	12.0602	8.30466e-08	4.03032e-05	8.54365	CG17192
FBgn0024248	-0.781405	9.34315	-12.0168	8.62649e-08	4.03145e-05	8.5076	chico
FBgn0031032	-0.565119	6.85994	-11.9747	8.9521e-08	4.0342e-05	8.47245	CG14204
FBgn0030899	-0.696164	7.47565	-11.8149	1.03141e-07	4.33813e-05	8.33782	Her
FBgn0031008	-0.353572	10.2225	-11.8413	1.00744e-07	4.33813e-05	8.3602	CG8010
FBgn0039801	0.950379	9.26089	11.7526	1.09052e-07	4.43877e-05	8.28474	Npc2h
FBgn0029114	-0.610537	9.56613	-11.6235	1.22484e-07	4.82968e-05	8.17393	Tollo
FBgn0261575	2.60614	8.81676	11.4552	1.42741e-07	5.45789e-05	8.02752	tobi
FBgn0010052	0.413285	6.93399	11.4033	1.49708e-07	5.55591e-05	7.98185	Jhe
FBgn0039914	-0.58591	9.72108	-11.3437	1.58147e-07	5.70143e-05	7.92924	mav
FBgn0033728	1.21191	9.22429	11.2146	1.78268e-07	5.984e-05	7.81417	Cpr49Ae
FBgn0033742	0.399018	7.02466	11.1752	1.84955e-07	5.984e-05	7.77874	CG8550
FBgn0034720	-0.354803	8.24818	-11.1998	1.80755e-07	5.984e-05	7.80084	CG11206
FBgn0259936	-0.729785	9.16717	-11.1806	1.84028e-07	5.984e-05	7.78357	Uhg3
FBgn0046302	1.26997	9.97503	11.0637	2.05374e-07	6.47853e-05	7.67784	CG10650
FBgn0020907	0.596537	9.45968	11.0118	2.15679e-07	6.51862e-05	7.63061	Scp2
FBgn0039419	-0.460723	8.40137	-11.0055	2.16977e-07	6.51862e-05	7.62482	CG12290
FBgn0014417	-0.583977	10.6839	-10.8474	2.5226e-07	7.23412e-05	7.4792	CG13397
FBgn0031031	-0.660166	7.16287	-10.8675	2.4744e-07	7.23412e-05	7.49787	CG14218
FBgn0040718	0.609919	8.25694	10.7878	2.67131e-07	7.49036e-05	7.42374	CG15353
FBgn0038914	1.31332	11.7647	10.6377	3.08939e-07	8.47433e-05	7.28271	fit
FBgn0032066	2.67247	8.07835	10.5747	3.28555e-07	8.82066e-05	7.22291	CG9463
FBgn0034295	1.16502	10.9775	10.5277	3.44029e-07	9.04367e-05	7.17816	CG10911
FBgn0261363	-0.525102	6.96005	-10.3792	3.98471e-07	0.000100558	7.03509	CG42640
FBgn0261375	-0.525102	6.96005	-10.3792	3.98471e-07	0.000100558	7.03509	Dox-3
FBgn0031406	1.32036	9.71398	10.3945	3.92458e-07	0.000100558	7.04991	CG17012
FBgn0026324	0.451572	9.13828	10.3499	4.10249e-07	0.0001015	7.00668	Taf10b
FBgn0027073	0.75879	9.05374	10.2465	4.54969e-07	0.000108317	6.90568	CG4302
FBgn0046878	0.36305	6.989	10.2634	4.47346e-07	0.000108317	6.92218	Obp83cd
FBgn0052667	1.00327	10.8439	10.1185	5.17817e-07	0.000120997	6.77914	CG32667
FBgn0002571	1.37813	7.7099	9.95296	6.13282e-07	0.000138186	6.61331	LvpL
FBgn0031860	0.633858	8.00088	9.9667	6.0467e-07	0.000138186	6.62718	CG11236
FBgn0053510	0.306381	6.33054	9.90061	6.47304e-07	0.000143293	6.56031	CG33510
FBgn0031694	0.331628	6.88832	9.8328	6.94438e-07	0.000147536	6.49125	Cyp4ac2
FBgn0033519	-0.486928	8.88679	-9.77619	7.36627e-07	0.000147536	6.43325	CG11825
FBgn0034289	1.22108	10.1915	9.79956	7.18884e-07	0.000147536	6.45723	CG10910
FBgn0036835	0.332352	7.4091	9.77668	7.36252e-07	0.000147536	6.43375	CG14075
FBgn0051262	-0.513227	9.46779	-9.84227	6.87637e-07	0.000147536	6.50092	CG31262
FBgn0052816	0.603312	7.57112	9.78587	7.29224e-07	0.000147536	6.44319	CG32816
FBgn0036975	0.543873	8.96115	9.74861	7.58178e-07	0.00014948	6.40487	CG5618
FBgn0036690	0.478041	10.1658	9.70616	7.92681e-07	0.000153878	6.36106	CG14059
FBgn0040606	0.798396	10.5475	9.62535	8.63148e-07	0.000165018	6.27714	CG6503
FBgn0033294	1.16501	7.24925	9.58072	9.04932e-07	0.000170424	6.23052	CG8693
FBgn0035678	0.542667	8.98072	9.54989	9.35074e-07	0.000173511	6.19819	CG10469
FBgn0083124	-0.354373	12.0128	-9.44629	1.04455e-06	0.000191017	6.08884	Uhg4
FBgn0030357	-0.493192	8.82716	-9.34637	1.16332e-06	0.000204108	5.98233	Sclp
FBgn0036330	-0.711266	8.0795	-9.3597	1.14667e-06	0.000204108	5.9966	CG11263
FBgn0038419	-0.326868	8.64893	-9.34531	1.16467e-06	0.000204108	5.98118	CG14879
FBgn0027494	0.530627	6.72325	9.29835	1.22552e-06	0.000208967	5.93076	RpS10a
FBgn0041604	-0.254976	9.80188	-9.30221	1.22039e-06	0.000208967	5.93492	dlp
FBgn0002609	-0.464624	7.98917	-9.24706	1.29593e-06	0.000218028	5.87541	HLHm3
FBgn0028398	0.54323	9.02382	9.21836	1.33722e-06	0.000222013	5.84433	Taf10
FBgn0053346	0.821539	7.96551	9.1959	1.37052e-06	0.000224587	5.81994	CG33346
FBgn0086445	-0.360792	8.68699	-9.1624	1.42187e-06	0.000230015	5.78345	l(2)37Cd
FBgn0014033	0.448946	6.80394	9.14668	1.44668e-06	0.000230633	5.76629	Sr-CI
FBgn0028473	-0.255668	11.869	-9.13696	1.46225e-06	0.000230633	5.75566	CG8801
FBgn0029137	-0.411841	7.58854	-9.11644	1.49571e-06	0.000232999	5.7332	Patsas
FBgn0024364	-0.368147	9.85204	-9.09421	1.5329e-06	0.000235879	5.70882	CG11417
FBgn0038291	0.589743	7.76058	9.06264	1.58743e-06	0.000241328	5.6741	CG3984
FBgn0035265	0.845612	7.5486	9.02541	1.65445e-06	0.000243304	5.63301	CG18173
FBgn0037439	-0.36978	9.97918	-9.02333	1.65827e-06	0.000243304	5.63071	CG10286
FBgn0039768	0.594944	6.73773	9.0336	1.63945e-06	0.000243304	5.64206	CG15533
FBgn0029588	-0.784132	7.61473	-8.95276	1.79417e-06	0.000260216	5.55239	CG14798
FBgn0038082	0.771472	6.92481	8.94168	1.81656e-06	0.00026047	5.54005	CG5724
FBgn0030234	0.43714	8.15641	8.90933	1.88371e-06	0.000267064	5.50393	CG15211
FBgn0039453	-0.563189	6.87979	-8.84493	2.02548e-06	0.000283972	5.43167	CG6403
FBgn0002869	0.708315	7.49999	8.83347	2.05189e-06	0.000284514	5.41876	MtnB
FBgn0029147	0.6307	7.00675	8.81771	2.0888e-06	0.000286483	5.401	NtR
FBgn0000320	-0.345164	7.80184	-8.7873	2.16211e-06	0.000290185	5.36662	eya
FBgn0030660	-0.337354	9.51753	-8.78078	2.17818e-06	0.000290185	5.35924	CG8097
FBgn0054026	1.00186	8.68905	8.77811	2.18478e-06	0.000290185	5.35622	CG34026
FBgn0029755	-0.239278	9.98634	-8.73696	2.28959e-06	0.000297836	5.30949	Sas10
FBgn0031245	0.60352	9.79916	8.74525	2.26805e-06	0.000297836	5.31892	CG3625
FBgn0036324	-0.299433	6.8277	-8.70537	2.3737e-06	0.000305626	5.2735	CG12520
FBgn0034454	0.399401	7.76073	8.69427	2.40403e-06	0.000306405	5.26082	CG15120
FBgn0024289	1.19096	9.67016	8.63819	2.56385e-06	0.000322558	5.19657	Sodh-1
FBgn0034885	0.686836	9.75625	8.6321	2.58189e-06	0.000322558	5.18956	CG4019
FBgn0010470	0.294142	11.1897	8.60622	2.66006e-06	0.000322737	5.15977	Fkbp13
FBgn0031460	0.60996	7.1469	8.61062	2.64659e-06	0.000322737	5.16484	CG15399
FBgn0038292	0.590157	8.12703	8.60684	2.65816e-06	0.000322737	5.16048	CG3987
FBgn0002569	1.10645	7.93921	8.57623	2.75381e-06	0.000328491	5.12516	LvpD
FBgn0052625	-0.347893	10.2526	-8.57443	2.75956e-06	0.000328491	5.12307	CG32625
FBgn0000047	1.41056	8.95502	8.52639	2.91762e-06	0.000340183	5.06739	Act88F
FBgn0002565	1.36676	7.36511	8.50474	2.99201e-06	0.000340183	5.04221	Lsp2
FBgn0027364	-0.370814	7.6423	-8.52862	2.91008e-06	0.000340183	5.06998	Six4
FBgn0032387	0.732057	7.49708	8.51392	2.96022e-06	0.000340183	5.05289	CG16965
FBgn0039678	0.994747	11.342	8.50458	2.99257e-06	0.000340183	5.04202	Obp99a
FBgn0000158	0.641067	9.29304	8.47401	3.10112e-06	0.00034026	5.00638	bam
FBgn0000592	0.624424	10.2965	8.48141	3.07447e-06	0.00034026	5.01501	Est-6
FBgn0003137	0.570796	9.15356	8.47825	3.08583e-06	0.00034026	5.01132	Ppn
FBgn0051104	1.10815	7.68147	8.48037	3.0782e-06	0.00034026	5.0138	CG31104
FBgn0022153	-0.300324	9.93439	-8.43098	3.26117e-06	0.000354736	4.95601	l(2)k05819
FBgn0035583	0.661313	9.29196	8.393	3.40984e-06	0.000364622	4.91137	CG13704
FBgn0051446	0.816664	7.94728	8.39316	3.40918e-06	0.000364622	4.91156	CG31446
FBgn0029833	-0.317053	9.12015	-8.36737	3.51426e-06	0.000369525	4.88115	CG5941
FBgn0036157	0.735628	7.48723	8.37019	3.50259e-06	0.000369525	4.88449	CG7560
FBgn0262560	-0.364398	9.12082	-8.34359	3.61423e-06	0.000373806	4.85305	wcd
FBgn0033494	0.477176	7.62823	8.3451	3.60781e-06	0.000373806	4.85483	KCNQ
FBgn0039800	0.56173	11.3453	8.31553	3.73616e-06	0.000383275	4.81979	Npc2g
FBgn0036578	-0.226522	10.737	-8.29869	3.81141e-06	0.000384745	4.7998	CG5018
FBgn0051148	1.10125	7.19955	8.29868	3.81147e-06	0.000384745	4.79978	CG31148
FBgn0033115	0.468401	7.22031	8.27939	3.89971e-06	0.000389679	4.77683	Spn42De
FBgn0050021	-0.258183	8.2292	-8.27457	3.92211e-06	0.000389679	4.77109	metro
FBgn0036767	0.988805	8.31442	8.25434	4.01764e-06	0.000396051	4.74695	CG16775
FBgn0031907	0.428783	9.34414	8.23385	4.1169e-06	0.00040269	4.72247	CG5171
FBgn0029942	-0.266558	9.90405	-8.19084	4.334e-06	0.000416594	4.67089	CG2059
FBgn0031693	0.713374	7.10835	8.18621	4.3581e-06	0.000416594	4.66533	Cyp4ac1
FBgn0033292	1.08344	7.77623	8.18778	4.34989e-06	0.000416594	4.66722	Cyp4ad1
FBgn0019938	-0.299878	10.5136	-8.13904	4.61193e-06	0.000431062	4.60848	RpI1
FBgn0030148	1.01818	8.04147	8.13973	4.60809e-06	0.000431062	4.60932	CG3106
FBgn0034552	-0.397481	7.74249	-8.1419	4.59609e-06	0.000431062	4.61194	CG17999
FBgn0003715	-0.429986	7.08472	-8.10804	4.78732e-06	0.000437874	4.57099	CG16778
FBgn0005664	0.566511	6.92429	8.11527	4.74578e-06	0.000437874	4.57974	Cry
FBgn0037228	0.510042	7.26447	8.10777	4.78892e-06	0.000437874	4.57065	CG1092
FBgn0033792	0.285128	6.4831	8.0746	4.98468e-06	0.000452494	4.53039	CG13325
FBgn0029167	0.712341	7.8649	8.06096	5.06766e-06	0.000456741	4.5138	Hml
FBgn0031417	0.809576	9.2518	8.02418	5.29891e-06	0.000474196	4.46893	CG3597
FBgn0032067	0.380825	6.38443	8.00817	5.40309e-06	0.000480114	4.44935	CG9465
FBgn0019928	0.834566	6.9982	7.98785	5.5385e-06	0.000488705	4.42445	Ser8
FBgn0010395	0.277142	7.58193	7.97821	5.60396e-06	0.000491047	4.41263	betaInt-nu
FBgn0038136	1.06233	8.84555	7.96312	5.7082e-06	0.000496731	4.39409	CG8774
FBgn0001296	-0.288335	11.1318	-7.92499	5.98096e-06	0.000512303	4.34711	kar
FBgn0031461	-0.502558	9.13669	-7.92886	5.95263e-06	0.000512303	4.35189	daw
FBgn0040367	0.277419	7.56169	7.92118	6.00894e-06	0.000512303	4.34241	CG11382
FBgn0040260	0.971141	8.49853	7.89005	6.2432e-06	0.000528703	4.3039	Ugt36Bc
FBgn0037515	-0.257939	9.25811	-7.85433	6.52409e-06	0.000548806	4.25958	Sp7
FBgn0035926	0.736178	11.2326	7.84411	6.60687e-06	0.000552089	4.24688	CG5804
FBgn0025382	-0.285083	8.25672	-7.83024	6.72113e-06	0.000557097	4.2296	Rab27
FBgn0035344	0.598763	8.1135	7.82617	6.7551e-06	0.000557097	4.22452	Cyp4d20
FBgn0036294	-0.397409	7.69871	-7.78093	7.14476e-06	0.000585406	4.168	CG10654
FBgn0035484	0.613004	8.64524	7.76005	7.3327e-06	0.000596929	4.14182	CG11594
FBgn0037717	-0.274682	9.09993	-7.72051	7.70338e-06	0.00061922	4.09208	CG8301
FBgn0041203	-0.265493	8.65805	-7.72037	7.70467e-06	0.00061922	4.09192	LIMK1
FBgn0041180	0.534287	9.6831	7.70129	7.89069e-06	0.000630157	4.06785	TepIV
FBgn0085205	0.793616	8.99849	7.67376	8.16772e-06	0.000648178	4.03303	CG34176
FBgn0015039	1.26458	9.70658	7.6604	8.30586e-06	0.000653855	4.01611	Cyp9b2
FBgn0015576	0.533767	8.43587	7.65686	8.3429e-06	0.000653855	4.01162	alpha-Est8
FBgn0040705	-0.34847	7.92745	-7.64694	8.44749e-06	0.000657966	3.99904	CG15434
FBgn0005614	-0.630167	7.67302	-7.62467	8.68777e-06	0.000668428	3.97073	trpl
FBgn0033221	0.71529	9.03306	7.62537	8.68009e-06	0.000668428	3.97162	CG12825
FBgn0033949	0.38002	6.93493	7.61163	8.83178e-06	0.000675331	3.95413	CG10131
FBgn0051898	-0.314661	9.25802	-7.60691	8.88452e-06	0.000675331	3.94812	CG31898
FBgn0003189	-0.355747	9.45879	-7.59965	8.96641e-06	0.000677474	3.93885	r
FBgn0032187	0.539734	7.56671	7.58611	9.12114e-06	0.000685063	3.92157	CG4839
FBgn0030737	0.650779	10.5932	7.57898	9.20388e-06	0.000686243	3.91245	CG9914
FBgn0053966	0.546951	7.01396	7.5754	9.24563e-06	0.000686243	3.90788	CG33966
FBgn0001114	0.550662	9.89641	7.54696	9.58512e-06	0.000706137	3.87145	Glt
FBgn0032904	0.343309	9.86604	7.53888	9.6839e-06	0.000706137	3.86109	Mtp
FBgn0033774	1.48048	11.6675	7.53454	9.73751e-06	0.000706137	3.85551	CG12374
FBgn0033999	1.1742	7.17008	7.53497	9.73209e-06	0.000706137	3.85608	CG8093
FBgn0036331	-0.348395	8.81883	-7.52799	9.81884e-06	0.000707967	3.84711	CG14117
FBgn0035929	0.585	7.4358	7.51104	1.0033e-05	0.000711218	3.8253	CG13311
FBgn0036812	-0.301665	9.29423	-7.51515	9.98059e-06	0.000711218	3.8306	Nufip
FBgn0039156	0.274434	10.2005	7.51238	1.00159e-05	0.000711218	3.82703	CG6178
FBgn0033723	0.604071	7.76983	7.47723	1.04751e-05	0.000738409	3.78171	CG13155
FBgn0036938	-0.42807	9.71308	-7.46956	1.05783e-05	0.000741539	3.7718	CG14187
FBgn0259896	0.390511	7.08276	7.4627	1.06715e-05	0.000743939	3.76294	nimC1
FBgn0003997	-0.343966	7.29358	-7.43875	1.10039e-05	0.000762897	3.73192	W
FBgn0010241	0.645254	7.40942	7.42076	1.12609e-05	0.000772228	3.70857	Mdr50
FBgn0032235	0.942775	8.79411	7.42364	1.12193e-05	0.000772228	3.71231	CG5096
FBgn0037724	0.488407	7.16967	7.4135	1.13664e-05	0.00077525	3.69914	Fst
FBgn0051265	0.942967	7.4865	7.39442	1.16489e-05	0.000790245	3.6743	CG31265
FBgn0051269	0.54319	6.97228	7.38634	1.17707e-05	0.000794238	3.66378	CG31269
FBgn0032373	0.898548	8.55873	7.36593	1.20847e-05	0.00080255	3.63714	Vha100-5
FBgn0039630	-0.557687	7.12641	-7.36612	1.20817e-05	0.00080255	3.63739	CG11843
FBgn0053520	-0.220366	8.02966	-7.36969	1.20262e-05	0.00080255	3.64205	Rpb4
FBgn0034741	0.50046	7.68969	7.35431	1.22674e-05	0.000810421	3.62195	CG4269
FBgn0025620	0.622288	8.13082	7.34145	1.2473e-05	0.000815464	3.60513	CG13360
FBgn0031141	0.67111	7.85448	7.34471	1.24207e-05	0.000815464	3.60939	CG1304
FBgn0030688	1.11436	9.02574	7.3358	1.25645e-05	0.000817213	3.59773	CG8952
FBgn0004552	0.28602	7.06932	7.32292	1.2776e-05	0.000826377	3.58083	Akh
FBgn0050042	0.669662	9.58946	7.31928	1.28364e-05	0.000826377	3.57606	Cpr49Ab
FBgn0032839	0.34031	6.66127	7.31014	1.29894e-05	0.000831981	3.56406	CG10659
FBgn0034663	1.45791	8.69233	7.30159	1.31344e-05	0.000837021	3.55282	CG4363
FBgn0003278	-0.337862	8.95381	-7.2855	1.34119e-05	0.000846159	3.53165	RpI135
FBgn0033367	0.614257	7.92709	7.28747	1.33776e-05	0.000846159	3.53425	CG8193
FBgn0030593	0.940671	10.3341	7.27557	1.35863e-05	0.000852895	3.51857	CG9512
FBgn0086451	-0.43769	9.73181	-7.25654	1.39275e-05	0.000869989	3.49345	l(2)k09022
FBgn0262169	0.290926	10.3352	7.23907	1.42486e-05	0.00087702	3.47036	magu
FBgn0034814	-0.281429	9.23904	-7.24427	1.41522e-05	0.00087702	3.47724	CG9890
FBgn0087013	-0.210061	12.4423	-7.23932	1.42441e-05	0.00087702	3.47068	Karybeta3
FBgn0015033	0.685461	7.36636	7.2273	1.44696e-05	0.000882017	3.45477	Cyp4d8
FBgn0029990	0.281598	13.3921	7.22974	1.44234e-05	0.000882017	3.45801	CG2233
FBgn0026721	0.644156	9.15729	7.19887	1.50184e-05	0.000911066	3.41705	fat-spondin
FBgn0034160	1.07545	7.54585	7.17113	1.55754e-05	0.000940334	3.38014	CG5550
FBgn0042186	0.857449	10.0017	7.16332	1.57361e-05	0.000945517	3.36973	CG17239
FBgn0051463	1.26149	7.26612	7.15244	1.59629e-05	0.000954599	3.35523	CG31463
FBgn0028950	1.2495	9.10084	7.14444	1.61321e-05	0.000955654	3.34454	CG15255
FBgn0261675	0.679687	6.90337	7.14692	1.60796e-05	0.000955654	3.34785	Npc1b
FBgn0031004	0.661883	7.86855	7.11392	1.67951e-05	0.000990285	3.3037	CG7992
FBgn0052633	0.698791	7.89768	7.10526	1.69885e-05	0.000997029	3.29209	CG32633
FBgn0002563	1.48901	7.35371	7.07465	1.76915e-05	0.00102871	3.25097	Lsp1beta
FBgn0031918	0.328743	7.27558	7.07785	1.76164e-05	0.00102871	3.25528	CG6055
FBgn0038299	0.458907	7.69226	7.06913	1.78214e-05	0.00103152	3.24355	Spn88Eb
FBgn0028872	0.436208	7.34561	7.06335	1.79587e-05	0.00103279	3.23576	CG18095
FBgn0037090	0.626494	8.21545	7.06132	1.80072e-05	0.00103279	3.23303	Est-Q
FBgn0032211	-0.364661	6.53866	-7.04659	1.83631e-05	0.00103904	3.21317	CG13138
FBgn0032413	0.460644	7.28883	7.04676	1.8359e-05	0.00103904	3.21339	CG16997
FBgn0038257	0.571575	7.52818	7.04826	1.83224e-05	0.00103904	3.21542	smp-30
FBgn0011556	1.35502	8.87898	7.03701	1.85988e-05	0.00104768	3.20023	zetaTry
FBgn0038916	0.2959	7.88177	7.02846	1.88118e-05	0.00105497	3.18867	dnd
FBgn0036754	-0.307878	9.08546	-7.01424	1.91717e-05	0.00107039	3.16944	CG5589
FBgn0021875	-0.228201	8.57209	-6.96959	2.0351e-05	0.00112686	3.10886	Zfrp8
FBgn0030928	0.683707	7.56949	6.96714	2.04178e-05	0.00112686	3.10553	CG15044
FBgn0050043	0.914417	7.23998	6.96593	2.0451e-05	0.00112686	3.10388	CG30043
FBgn0033397	0.518383	7.80008	6.96117	2.05818e-05	0.00112914	3.09741	Cyp4p3
FBgn0031248	1.40846	8.91767	6.94703	2.0976e-05	0.00114578	3.07815	CG11912
FBgn0028703	-0.261692	8.38732	-6.93934	2.11936e-05	0.00115268	3.06767	Nhe3
FBgn0028491	0.349888	8.45706	6.90628	2.21575e-05	0.0011948	3.0225	CG2930
FBgn0029898	0.332134	7.59226	6.90646	2.21522e-05	0.0011948	3.02275	CG14439
FBgn0033815	-0.433555	8.45458	-6.89366	2.25379e-05	0.00120501	3.00521	CG4676
FBgn0037521	-0.330643	6.77707	-6.89636	2.2456e-05	0.00120501	3.00891	CG2993
FBgn0031813	0.831264	9.29842	6.86815	2.33279e-05	0.00124199	2.97022	CG9527
FBgn0030544	0.233281	6.62872	6.83584	2.43717e-05	0.00128709	2.92575	CG13403
FBgn0063499	0.415148	8.4761	6.83562	2.4379e-05	0.00128709	2.92544	GstE10
FBgn0010387	0.666355	10.8083	6.83187	2.4503e-05	0.00128825	2.92028	Dbi
FBgn0054043	0.723232	8.64213	6.82479	2.47397e-05	0.00129529	2.91052	CG34043
FBgn0025692	0.543046	8.50418	6.80972	2.52515e-05	0.00130051	2.88971	CG3814
FBgn0033458	-0.296488	11.0207	-6.81666	2.50145e-05	0.00130051	2.89929	CG18446
FBgn0036549	0.441015	9.05119	6.81076	2.52161e-05	0.00130051	2.89113	CG10516
FBgn0040102	0.367465	7.09783	6.81555	2.50523e-05	0.00130051	2.89776	lectin-24Db
FBgn0033917	-0.292933	9.67191	-6.79766	2.56695e-05	0.00131666	2.87302	CG8503
FBgn0033720	0.270138	6.77169	6.79208	2.58651e-05	0.00132132	2.86531	CG13160
FBgn0028945	1.52055	7.28513	6.78259	2.62018e-05	0.00132777	2.85216	CG7631
FBgn0032981	0.212175	6.42177	6.78491	2.6119e-05	0.00132777	2.85538	CG3635
FBgn0031040	-0.270134	9.70874	-6.7551	2.72039e-05	0.00136878	2.81401	CG14210
FBgn0037167	0.470763	7.40914	6.75445	2.72281e-05	0.00136878	2.8131	CG11425
FBgn0051632	0.314706	6.67408	6.74841	2.74538e-05	0.00137465	2.80471	sens-2
FBgn0033423	1.17617	8.27045	6.73708	2.78827e-05	0.00137991	2.78895	CG1809
FBgn0037288	0.858293	10.4843	6.73697	2.78869e-05	0.00137991	2.7888	CG14661
FBgn0040735	-0.42814	8.7968	-6.73916	2.78036e-05	0.00137991	2.79184	CG16836
FBgn0001316	-0.381381	10.0071	-6.72801	2.82315e-05	0.00138609	2.77631	klar
FBgn0261016	-0.3073	10.4601	-6.72973	2.81648e-05	0.00138609	2.77871	clos
FBgn0043470	1.81302	9.06804	6.71657	2.86776e-05	0.00139712	2.76037	lambdaTry
FBgn0051343	1.25013	10.6175	6.7182	2.86135e-05	0.00139712	2.76264	CG31343
FBgn0000044	0.304485	12.8074	6.7056	2.91129e-05	0.00141287	2.74505	Act57B
FBgn0033659	0.8066	7.9637	6.69046	2.97249e-05	0.00143477	2.72389	Damm
FBgn0051087	0.421718	7.71676	6.68883	2.97914e-05	0.00143477	2.72161	CG31087
FBgn0033592	-0.415591	6.53722	-6.66754	3.06777e-05	0.00147183	2.6918	CG13215
FBgn0000565	-0.816675	10.4996	-6.66097	3.09567e-05	0.00147185	2.68259	Eip71CD
FBgn0003062	-0.298977	11.605	-6.65117	3.13781e-05	0.00147185	2.66883	Fib
FBgn0010246	0.568635	9.81251	6.6548	3.12213e-05	0.00147185	2.67393	Myo61F
FBgn0023477	0.224016	12.1011	6.6543	3.12429e-05	0.00147185	2.67323	Tal
FBgn0029765	0.760415	9.2012	6.65267	3.13132e-05	0.00147185	2.67094	CG16756
FBgn0085421	-0.363566	7.23213	-6.65752	3.11046e-05	0.00147185	2.67774	Epac
FBgn0022355	0.788437	9.39583	6.63063	3.22816e-05	0.00150585	2.63995	Tsf1
FBgn0030829	0.624733	7.39975	6.62751	3.24209e-05	0.00150585	2.63557	CG12998
FBgn0035667	0.617155	10.7428	6.62662	3.24609e-05	0.00150585	2.63432	Jon65Ai
FBgn0015575	0.732468	9.63631	6.61906	3.28024e-05	0.00151282	2.62367	alpha-Est7
FBgn0039342	1.68023	10.4784	6.618	3.28509e-05	0.00151282	2.62216	CG5107
FBgn0033234	0.458569	7.93229	6.6115	3.3148e-05	0.00152095	2.613	CG8791
FBgn0042092	-0.217435	10.3318	-6.58947	3.41763e-05	0.00156245	2.58192	CG13773
FBgn0051266	1.07885	7.81385	6.58471	3.44031e-05	0.00156714	2.57518	CG31266
FBgn0040364	0.555117	8.88009	6.57187	3.50225e-05	0.00158962	2.55702	CG11378
FBgn0010309	-0.343239	8.9862	-6.56835	3.51941e-05	0.00159168	2.55205	pigeon
FBgn0029828	0.542011	9.4968	6.55306	3.59515e-05	0.00162013	2.53037	CG6067
FBgn0013949	0.489598	9.07151	6.53092	3.70788e-05	0.00166498	2.49895	Ela
FBgn0030731	0.433443	10.3495	6.51544	3.78894e-05	0.00169535	2.47693	CG3415
FBgn0000153	0.466979	9.18398	6.51029	3.81633e-05	0.00170157	2.4696	b
FBgn0033250	-0.606374	9.41509	-6.50411	3.84947e-05	0.0017103	2.46079	CG14762
FBgn0043471	1.00427	8.06138	6.49065	3.92272e-05	0.00173673	2.4416	kappaTry
FBgn0053109	0.646043	10.3464	6.48426	3.95802e-05	0.00174623	2.43248	CG33109
FBgn0025814	0.239884	7.18145	6.47073	4.03387e-05	0.0017735	2.41315	Mgstl
FBgn0027525	-0.219247	11.3218	-6.45712	4.11176e-05	0.00180146	2.39367	CG7686
FBgn0033582	0.588627	7.29403	6.45225	4.14003e-05	0.00180757	2.38669	CG9084
FBgn0004053	-0.27205	7.13283	-6.44858	4.16147e-05	0.00181067	2.38143	zen
FBgn0261393	-0.207871	9.28264	-6.43078	4.26708e-05	0.00185024	2.3559	alpha-Est5
FBgn0011296	0.280014	9.82028	6.42379	4.30934e-05	0.00186217	2.34587	l(2)efl
FBgn0032068	2.59734	9.67214	6.40008	4.45608e-05	0.00191901	2.31176	CG9466
FBgn0032074	0.857469	9.60142	6.37838	4.595e-05	0.00195877	2.28048	Tsp29Fa
FBgn0033799	-0.384026	8.83697	-6.37947	4.58788e-05	0.00195877	2.28206	GLaz
FBgn0044872	0.2121	6.57923	6.38093	4.57844e-05	0.00195877	2.28416	FucTC
FBgn0038057	-0.286235	8.74423	-6.36582	4.67755e-05	0.00198725	2.26234	CG12267
FBgn0032178	-0.20794	7.42631	-6.35897	4.72321e-05	0.00199992	2.25244	Spn31A
FBgn0020493	-0.33459	9.03974	-6.34596	4.81126e-05	0.00202362	2.23362	Dad
FBgn0031458	-0.21884	8.30987	-6.34749	4.80079e-05	0.00202362	2.23584	aph-1
FBgn0032472	0.541344	10.2742	6.33931	4.85696e-05	0.00203605	2.22398	CG9928
FBgn0029891	-0.292277	9.7766	-6.33142	4.91178e-05	0.00204683	2.21255	Pink1
FBgn0039107	0.369967	6.86201	6.33094	4.91511e-05	0.00204683	2.21186	CG10300
FBgn0034436	0.542243	8.17259	6.31868	5.00161e-05	0.002076	2.19408	CG11961
FBgn0030079	0.347427	9.89426	6.31133	5.05431e-05	0.00208416	2.18339	CG7267
FBgn0032282	-0.303368	7.66458	-6.31311	5.04147e-05	0.00208416	2.18599	CG7299
FBgn0037782	2.07304	8.63548	6.30664	5.08823e-05	0.00209131	2.17658	Npc2d
FBgn0030270	0.621845	7.72208	6.29716	5.15751e-05	0.00210607	2.16279	CG15199
FBgn0035006	0.564516	6.94422	6.29786	5.15231e-05	0.00210607	2.16382	CG4563
FBgn0011642	-0.396045	9.92148	-6.28765	5.22798e-05	0.00212796	2.14896	Zyx102EF
FBgn0019643	0.49483	9.14009	6.27599	5.31587e-05	0.00215677	2.13197	Dat
FBgn0051410	0.805497	8.84004	6.27136	5.35117e-05	0.00216414	2.12522	Npc2e
FBgn0023522	-0.185207	10.8274	-6.26156	5.42676e-05	0.00218493	2.11092	CG11596
FBgn0031811	-0.263936	6.44704	-6.258	5.45454e-05	0.00218493	2.10571	CG13982
FBgn0033092	-0.238283	9.31678	-6.25867	5.4493e-05	0.00218493	2.1067	CG9422
FBgn0250843	0.211134	11.8883	6.25164	5.50451e-05	0.00219797	2.09642	Pros35
FBgn0023541	0.798871	7.40099	6.24517	5.55582e-05	0.00220414	2.08696	Cyp4d14
FBgn0034312	-0.273728	8.05238	-6.24309	5.57235e-05	0.00220414	2.08393	CG10916
FBgn0046322	0.317321	6.9358	6.24641	5.54587e-05	0.00220414	2.08879	p38c
FBgn0015558	0.31345	7.59705	6.23459	5.6408e-05	0.00222281	2.07148	tty
FBgn0034662	0.966311	8.39166	6.23286	5.65481e-05	0.00222281	2.06896	CG13492
FBgn0033167	0.368083	6.39101	6.22789	5.6953e-05	0.00223178	2.06168	CG1701
FBgn0034052	1.61363	8.36971	6.22369	5.72978e-05	0.00223834	2.05553	CG8299
FBgn0035409	0.570183	8.50415	6.22023	5.75836e-05	0.00224256	2.05045	CG14963
FBgn0010423	0.648909	8.36367	6.21486	5.80305e-05	0.00225301	2.04257	TpnC47D
FBgn0035084	-0.221172	7.41662	-6.21054	5.83918e-05	0.00225318	2.03624	CG15861
FBgn0037292	0.454821	9.00545	6.21264	5.82159e-05	0.00225318	2.03932	CG2022
FBgn0029994	0.565813	10.2471	6.20256	5.90664e-05	0.00225849	2.02453	CG2254
FBgn0030157	0.519845	9.91485	6.20369	5.89703e-05	0.00225849	2.02619	CG1468
FBgn0052711	-0.419618	8.70037	-6.20603	5.8772e-05	0.00225849	2.02962	CG32711
FBgn0038924	0.21044	10.8196	6.19871	5.9395e-05	0.00226419	2.01887	CG6028
FBgn0033366	0.560103	8.86105	6.18729	6.0381e-05	0.00229484	2.00208	Ance-4
FBgn0035743	0.32792	7.82325	6.18118	6.09158e-05	0.00230822	1.99309	CG15829
FBgn0035252	0.221706	11.3709	6.17616	6.13582e-05	0.00231802	1.98571	CG7970
FBgn0036320	0.350776	6.90456	6.17179	6.17472e-05	0.00232575	1.97927	CG10943
FBgn0001258	0.56314	8.45915	6.15771	6.3016e-05	0.00235945	1.95852	ImpL3
FBgn0035431	0.349145	8.01601	6.15963	6.28412e-05	0.00235945	1.96136	CG14968
FBgn0038337	0.567209	9.2587	6.15458	6.33018e-05	0.00236314	1.95391	CG6125
FBgn0031913	0.401676	11.2547	6.14787	6.39201e-05	0.00236523	1.94399	CG5958
FBgn0035791	0.175498	7.08763	6.14861	6.38513e-05	0.00236523	1.94509	CG8539
FBgn0051233	0.927046	10.2279	6.14974	6.37467e-05	0.00236523	1.94676	CG31233
FBgn0033257	-0.351606	7.29596	-6.13691	6.49427e-05	0.00239604	1.92781	CG8713
FBgn0051809	0.826545	7.73677	6.11918	6.66337e-05	0.00245126	1.90159	CG31809
FBgn0031741	0.474718	9.07448	6.11482	6.70574e-05	0.00245968	1.89512	CG11034
FBgn0040349	0.747081	8.70517	6.10698	6.78256e-05	0.00248065	1.8835	CG3699
FBgn0029750	-0.214499	6.24725	-6.10451	6.80696e-05	0.00248238	1.87984	CG3323
FBgn0051205	0.510232	7.96119	6.09815	6.87018e-05	0.00249821	1.87041	CG31205
FBgn0032069	3.1961	9.10516	6.09042	6.9479e-05	0.00251921	1.85893	CG9468
FBgn0039326	0.624694	8.58216	6.0841	7.01207e-05	0.0025352	1.84956	CG10562
FBgn0037396	0.41968	7.43845	6.06389	7.22169e-05	0.00260352	1.8195	CG11459
FBgn0030040	0.660525	9.90219	6.05751	7.28931e-05	0.00262041	1.81	CG15347
FBgn0039520	-0.247451	6.45842	-6.04266	7.44917e-05	0.00267027	1.78786	Gr98a
FBgn0035718	1.23531	8.31672	6.03169	7.56962e-05	0.00269812	1.7715	CG14820
FBgn0038700	0.837532	8.58391	6.03207	7.56551e-05	0.00269812	1.77205	CG3734
FBgn0030504	-0.246768	10.9728	-6.01709	7.73321e-05	0.00274867	1.74968	CG2691
FBgn0040636	0.443743	7.97234	6.01008	7.81319e-05	0.00276153	1.73918	CG13255
FBgn0085317	0.274699	7.09421	6.0108	7.80494e-05	0.00276153	1.74026	CG34288
FBgn0033981	0.663657	7.82059	6.00673	7.85168e-05	0.00276739	1.73417	Cyp6a21
FBgn0036831	0.583148	8.2578	6.00416	7.88125e-05	0.00277007	1.73033	CG6839
FBgn0043783	0.83584	10.2056	6.00151	7.91198e-05	0.00277315	1.72636	CG32444
FBgn0004143	-0.32146	6.5381	-5.99129	8.0317e-05	0.00280217	1.71103	nullo
FBgn0036619	-0.32147	6.91478	-5.99065	8.03919e-05	0.00280217	1.71008	Cpr72Ec
FBgn0051198	0.772603	11.6829	5.98147	8.14839e-05	0.00282809	1.69631	CG31198
FBgn0052407	0.480434	7.81615	5.98064	8.15839e-05	0.00282809	1.69506	CG32407
FBgn0022023	-0.18787	11.708	-5.97396	8.23891e-05	0.00284818	1.68504	eIF-3p40
FBgn0038845	0.845907	8.65053	5.97156	8.26802e-05	0.00285043	1.68144	CG10827
FBgn0034291	0.706988	8.03982	5.96856	8.30471e-05	0.00285528	1.67692	CG5770
FBgn0010520	-0.193495	10.0681	-5.96481	8.35062e-05	0.00285551	1.67129	Bka
FBgn0031161	-0.241135	9.56426	-5.96632	8.33213e-05	0.00285551	1.67356	CG15445
FBgn0035360	0.528392	8.30518	5.9622	8.38277e-05	0.00285875	1.66737	CG1246
FBgn0031732	0.407159	7.12464	5.95379	8.4874e-05	0.00288663	1.65471	CG11149
FBgn0002789	0.441441	11.4376	5.94902	8.54724e-05	0.00289797	1.64754	Mp20
FBgn0024179	-0.349508	8.48275	-5.94748	8.56667e-05	0.00289797	1.64523	wit
FBgn0035541	-0.195765	10.7822	-5.94276	8.62656e-05	0.00291042	1.63812	CG15019
FBgn0034162	0.539318	10.2274	5.92977	8.79369e-05	0.0029589	1.61853	CG6426
FBgn0035950	0.339716	10.1934	5.92077	8.91137e-05	0.00299052	1.60496	CG5288
FBgn0015570	0.637086	8.72234	5.91182	9.03018e-05	0.00301807	1.59144	alpha-Est2
FBgn0034437	0.499238	6.61029	5.90743	9.08914e-05	0.00301807	1.5848	CG10051
FBgn0036046	0.335611	7.66779	5.90796	9.082e-05	0.00301807	1.5856	Ilp2
FBgn0041337	0.55408	6.97863	5.9088	9.0707e-05	0.00301807	1.58687	Cyp309a2
FBgn0032494	0.61243	10.275	5.90362	9.14058e-05	0.00302203	1.57904	CG5945
FBgn0086912	-0.205644	10.8122	-5.903	9.14895e-05	0.00302203	1.57811	mbm
FBgn0029931	-0.240844	6.72088	-5.8986	9.20877e-05	0.00303385	1.57145	CG14427
FBgn0002733	-0.271708	7.70875	-5.87834	9.48973e-05	0.00309369	1.54077	HLHmbeta
FBgn0028949	0.279108	6.48155	5.87876	9.48385e-05	0.00309369	1.54141	CG15254
FBgn0034807	0.47798	9.3011	5.88244	9.43207e-05	0.00309369	1.547	CG9897
FBgn0036833	0.456411	9.64102	5.87558	9.52865e-05	0.00309369	1.5366	CG3819
FBgn0038214	0.340669	7.0324	5.87758	9.50038e-05	0.00309369	1.53963	CG9616
FBgn0040064	0.219753	11.7618	5.87496	9.53751e-05	0.00309369	1.53565	yip2
FBgn0052687	0.4733	10.2898	5.87306	9.56437e-05	0.00309444	1.53278	CG32687
FBgn0036369	-0.227585	6.56195	-5.868	9.63653e-05	0.00310772	1.5251	CG10089
FBgn0051681	0.587087	11.012	5.86674	9.65468e-05	0.00310772	1.52318	CG31681
FBgn0000346	-0.276345	9.13341	-5.85697	9.79591e-05	0.00310934	1.50836	comt
FBgn0011554	0.77472	7.69623	5.86237	9.71763e-05	0.00310934	1.51655	etaTry
FBgn0023000	-0.341206	9.1339	-5.85404	9.8388e-05	0.00310934	1.5039	mth
FBgn0029525	-0.262424	9.59255	-5.85771	9.78521e-05	0.00310934	1.50947	CG18273
FBgn0031961	0.331474	7.02236	5.85281	9.85683e-05	0.00310934	1.50203	CG7102
FBgn0037489	-0.310286	10.0386	-5.86336	9.70323e-05	0.00310934	1.51806	CG1234
FBgn0038098	0.538058	7.9193	5.85832	9.77635e-05	0.00310934	1.5104	CG7381
FBgn0038662	0.232912	11.1233	5.85529	9.82052e-05	0.00310934	1.5058	CG14290
FBgn0036208	0.397389	7.42113	5.84081	0.000100345	0.00315749	1.48379	CG10361
FBgn0044048	0.461309	7.08165	5.83597	0.000101072	0.00317245	1.47642	Ilp5
FBgn0030309	0.270963	9.54627	5.83193	0.000101682	0.00318368	1.47028	CG1572
FBgn0034756	-0.329202	8.70431	-5.82529	0.000102695	0.00320743	1.46016	Cyp6d2
FBgn0028920	2.0501	9.05871	5.82342	0.000102982	0.00320846	1.45731	CG8997
FBgn0010357	0.693377	12.4303	5.81676	0.00010401	0.00323249	1.44717	betaTry
FBgn0033059	-0.236726	10.1805	-5.80545	0.000105782	0.00327951	1.42992	CG7845
FBgn0035623	0.224474	6.17933	5.79874	0.00010685	0.00330448	1.41967	mthl2
FBgn0002931	-0.278	6.53095	-5.78144	0.000109653	0.00338289	1.39322	net
FBgn0259238	0.235848	8.94458	5.77727	0.000110341	0.0033958	1.38684	CG42336
FBgn0036668	-0.223024	10.6359	-5.76966	0.000111607	0.00341809	1.37519	CG9715
FBgn0039769	1.32256	7.30744	5.77037	0.000111487	0.00341809	1.37628	CG15534
FBgn0046258	0.257246	7.7024	5.76795	0.000111893	0.00341857	1.37257	CG12880
FBgn0004656	-0.169586	9.73294	-5.76057	0.000113139	0.0034389	1.36127	fs(1)h
FBgn0031558	0.46504	7.49627	5.75598	0.000113921	0.0034389	1.35423	CG16704
FBgn0032286	0.287267	7.68761	5.75737	0.000113685	0.0034389	1.35635	CG7300
FBgn0033473	-0.269634	9.33349	-5.7565	0.000113833	0.0034389	1.35503	CG12128
FBgn0034460	0.218611	6.86517	5.76201	0.000112895	0.0034389	1.36347	CG18367
FBgn0016032	0.214136	7.89953	5.74778	0.000115334	0.00345375	1.34165	lbm
FBgn0035094	0.358894	7.73015	5.74766	0.000115355	0.00345375	1.34146	CG9380
FBgn0035308	-0.276435	7.11819	-5.74513	0.000115794	0.00345375	1.33758	CG15822
FBgn0036367	0.652218	8.30054	5.74611	0.000115625	0.00345375	1.33907	CG10116
FBgn0036587	0.413131	7.24793	5.74363	0.000116056	0.00345375	1.33528	CG4950
FBgn0037764	0.473742	7.99048	5.74597	0.000115648	0.00345375	1.33887	CG9459
FBgn0002531	0.345293	6.47996	5.73449	0.000117663	0.00348071	1.32123	Lcp1
FBgn0039091	0.595548	7.07236	5.73378	0.000117789	0.00348071	1.32014	CG10182
FBgn0052277	0.520792	8.17685	5.73508	0.000117559	0.00348071	1.32213	CG32277
FBgn0261439	-0.183228	11.8569	-5.72954	0.000118542	0.00349478	1.31363	SdhA
FBgn0030334	0.281369	6.82628	5.72518	0.000119324	0.00350575	1.30692	Karl
FBgn0032801	0.311993	9.23058	5.72437	0.00011947	0.00350575	1.30567	CG10165
FBgn0036597	0.209303	6.62162	5.71904	0.000120432	0.00352578	1.29748	CG4962
FBgn0027572	0.390095	9.59866	5.7116	0.00012179	0.00355729	1.28603	CG5009
FBgn0032398	0.187225	10.5096	5.70591	0.000122841	0.0035797	1.27725	CG6766
FBgn0052284	0.589033	7.12085	5.70389	0.000123216	0.00358236	1.27414	CG32284
FBgn0034628	0.349522	10.1392	5.69792	0.000124331	0.00360646	1.26494	Acox57D-p
FBgn0040994	-0.243886	7.12142	-5.69046	0.00012574	0.00363895	1.25344	CG17567
FBgn0000246	-0.385456	9.9103	-5.68503	0.000126777	0.00365222	1.24505	c(3)G
FBgn0036766	0.53147	11.4478	5.68573	0.000126642	0.00365222	1.24613	CG5506
FBgn0031681	-0.24929	9.01374	-5.6724	0.000129222	0.003701	1.22554	pgant5
FBgn0050349	-0.238062	10.6041	-5.67411	0.000128887	0.003701	1.22819	CG30349
FBgn0053514	0.53056	7.148	5.67174	0.00012935	0.003701	1.22453	CG33514
FBgn0037633	-0.295437	9.04632	-5.66983	0.000129726	0.00370336	1.22156	CG9839
FBgn0033978	0.781455	9.683	5.6519	0.000133298	0.00379672	1.19383	Cyp6a23
FBgn0030968	0.428296	9.81385	5.64549	0.000134601	0.00382521	1.18389	CG7322
FBgn0038479	0.45684	6.71845	5.64113	0.000135495	0.00383976	1.17713	CG17477
FBgn0052023	0.395625	8.62074	5.64003	0.000135721	0.00383976	1.17542	CG32023
FBgn0037763	0.46383	10.7831	5.6311	0.000137574	0.00388345	1.16158	CG16904
FBgn0031148	-0.248951	10.8301	-5.60891	0.000142296	0.0040078	1.12711	CG1753
FBgn0260768	-0.367824	10.0707	-5.60484	0.000143182	0.0040157	1.12077	CG42566
FBgn0260767	-0.367824	10.0707	-5.60484	0.000143182	0.0040157	1.12077	CG42565
FBgn0053051	-0.264497	8.27434	-5.60397	0.000143371	0.0040157	1.11942	CG33051
FBgn0063497	0.469101	9.40546	5.60324	0.000143532	0.0040157	1.11828	GstE3
FBgn0023531	-0.170458	6.85103	-5.60051	0.000144128	0.00402347	1.11404	CG32809
FBgn0001145	0.400333	11.0995	5.59416	0.00014553	0.00405318	1.10416	Gs2
FBgn0014031	0.555923	9.86987	5.59279	0.000145835	0.00405318	1.10202	Spat
FBgn0004057	0.311374	9.22479	5.58837	0.000146821	0.00407161	1.09514	Zw
FBgn0032394	0.268287	11.2806	5.58	0.000148708	0.00410591	1.08209	CG6746
FBgn0039543	0.218935	10.1425	5.58056	0.000148581	0.00410591	1.08296	CG12428
FBgn0022288	-0.196034	11.061	-5.57464	0.000149931	0.00413062	1.07373	l(2)09851
FBgn0086898	-0.382834	8.5537	-5.56754	0.000151567	0.0041666	1.06265	dgo
FBgn0003863	0.620793	12.8691	5.56574	0.000151984	0.00416898	1.05984	alphaTry
FBgn0028406	0.347512	9.21057	5.56117	0.00015305	0.00418911	1.0527	Drep-4
FBgn0031224	-0.193092	9.29858	-5.55321	0.000154924	0.00423125	1.04027	CG11454
FBgn0031745	-0.279404	8.16169	-5.55059	0.000155547	0.00423908	1.03617	CG8965
FBgn0031762	-0.246244	7.64493	-5.54686	0.000156438	0.00425285	1.03034	CG9098
FBgn0058298	-0.221249	6.9797	-5.54566	0.000156726	0.00425285	1.02846	CG40298
FBgn0010768	-0.286078	8.10494	-5.5377	0.000158648	0.00428481	1.01601	sqz
FBgn0036638	0.342266	7.05398	5.53597	0.00015907	0.00428481	1.0133	CG13033
FBgn0037230	0.412885	8.32477	5.53657	0.000158925	0.00428481	1.01423	CG9780
FBgn0044050	0.348307	6.98645	5.53518	0.000159263	0.00428481	1.01206	Ilp3
FBgn0032075	0.465938	10.7999	5.53134	0.000160203	0.00428532	1.00604	Tsp29Fb
FBgn0033459	-0.337295	9.59361	-5.53308	0.000159776	0.00428532	1.00877	CG12744
FBgn0038973	1.09919	10.8396	5.53094	0.0001603	0.00428532	1.00543	CG18594
FBgn0016076	-0.352281	8.21915	-5.51481	0.00016432	0.00437516	0.980126	vri
FBgn0032346	-0.241008	9.16567	-5.51467	0.000164355	0.00437516	0.979914	Csl4
FBgn0032620	-0.183401	10.3533	-5.51199	0.000165034	0.00437797	0.975703	CG12288
FBgn0050281	0.330811	7.18786	5.51151	0.000165154	0.00437797	0.974958	CG30281
FBgn0034888	0.480576	7.74974	5.50797	0.000166055	0.00438705	0.969402	CG5431
FBgn0039274	-0.186287	10.163	-5.50743	0.000166192	0.00438705	0.968558	CG11920
FBgn0086447	-0.235482	9.95358	-5.5003	0.000168025	0.00442619	0.957353	l(2)37Cg
FBgn0032818	-0.244621	9.43129	-5.49648	0.000169015	0.00444298	0.951355	CG10628
FBgn0261554	-0.204115	10.3927	-5.49473	0.000169471	0.00444571	0.948602	CG42672
FBgn0050047	0.401762	7.36537	5.49316	0.000169881	0.00444721	0.946135	CG30047
FBgn0033222	0.582389	7.90395	5.48657	0.000171612	0.00448324	0.935777	CG12824
FBgn0011834	0.516878	8.78876	5.48299	0.000172561	0.0044987	0.930148	Ser6
FBgn0035933	0.703229	8.93838	5.48142	0.000172979	0.00450032	0.927673	CG13309
FBgn0005390	-0.252754	10.2963	-5.4781	0.000173867	0.00451409	0.922447	fs(1)M3
FBgn0039470	1.07517	7.36397	5.47622	0.000174371	0.00451789	0.919488	CG6296
FBgn0000053	-0.331372	9.31713	-5.4708	0.000175834	0.00453963	0.910952	ade3
FBgn0036810	-0.406333	6.44361	-5.47045	0.000175929	0.00453963	0.9104	CG6885
FBgn0031489	0.308852	8.83918	5.4687	0.000176405	0.00454261	0.907642	CG17224
FBgn0025693	0.262037	7.96865	5.4554	0.000180063	0.00462736	0.886679	CG11163
FBgn0037212	-0.596308	8.21032	-5.44995	0.000181586	0.00465568	0.878076	nAcRalpha-80B
FBgn0039154	0.768622	8.46806	5.44882	0.000181903	0.00465568	0.876295	Npc2f
FBgn0035665	0.474307	12.753	5.446	0.000182697	0.00466655	0.871843	Jon65Aiii
FBgn0031263	0.212393	11.7004	5.44172	0.000183911	0.00468805	0.865083	CG2789
FBgn0035904	0.287914	9.79114	5.43707	0.000185237	0.00471235	0.85774	CG6776
FBgn0034058	-0.212379	10.2589	-5.43414	0.000186077	0.00472419	0.853121	CG8315
FBgn0037870	0.221604	6.60091	5.43214	0.000186654	0.00472932	0.849959	CG18577
FBgn0015001	1.30176	7.69919	5.42312	0.00018928	0.00475379	0.835689	iotaTry
FBgn0025117	-0.1716	12.0851	-5.42236	0.000189504	0.00475379	0.834482	und
FBgn0028940	0.527448	8.68163	5.4246	0.000188846	0.00475379	0.838032	Cyp28a5
FBgn0035524	-0.193294	10.4782	-5.42328	0.000189232	0.00475379	0.835947	CG11583
FBgn0036772	-0.172232	8.84249	-5.42366	0.000189122	0.00475379	0.836541	CG5290
FBgn0004569	-0.251454	7.42883	-5.41293	0.000192292	0.00480462	0.819565	argos
FBgn0031654	1.2376	9.68372	5.41297	0.00019228	0.00480462	0.819625	Jon25Bii
FBgn0035501	0.276899	8.63611	5.39536	0.000197605	0.00492763	0.791723	CG1299
FBgn0039483	0.413587	7.95492	5.39337	0.000198219	0.00493319	0.788555	CG14259
FBgn0033320	0.454408	8.46077	5.39155	0.00019878	0.0049374	0.78567	CG8586
FBgn0037440	0.22145	8.96481	5.38538	0.000200693	0.00495594	0.775887	CG1041
FBgn0038183	-0.199809	9.46681	-5.38535	0.000200704	0.00495594	0.775829	CG9286
FBgn0040336	0.187726	9.11283	5.38649	0.000200348	0.00495594	0.777642	CG9904
FBgn0034664	0.835921	8.26395	5.37822	0.00020294	0.00500136	0.764513	CG4377
FBgn0039817	0.346616	6.80173	5.37604	0.00020363	0.00500857	0.761049	CG15553
FBgn0039704	0.343528	6.52103	5.37117	0.000205177	0.00503682	0.753315	neo
FBgn0032495	0.296996	7.03139	5.36606	0.000206818	0.00505008	0.74518	CG16820
FBgn0038105	0.378317	7.78583	5.36575	0.000206918	0.00505008	0.744685	yellow-f2
FBgn0038309	0.201846	6.44118	5.36637	0.000206717	0.00505008	0.74568	CG6499
FBgn0033926	0.310314	11.3723	5.36145	0.000208307	0.00507417	0.737851	Arc1
FBgn0026562	0.351711	10.3674	5.35893	0.000209125	0.00507449	0.73385	BM-40-SPARC
FBgn0031170	0.285932	8.76277	5.35959	0.000208912	0.00507449	0.734889	CG1718
FBgn0030617	0.29382	6.98141	5.35659	0.00020989	0.00508327	0.730121	CG9095
FBgn0004228	0.551395	8.20718	5.34899	0.000212392	0.00511443	0.718015	mex1
FBgn0010225	0.441851	10.3739	5.34958	0.000212197	0.00511443	0.718952	Gel
FBgn0033065	-0.623402	9.07474	-5.34919	0.000212325	0.00511443	0.718339	Cyp6w1
FBgn0020312	-0.177845	9.61338	-5.34523	0.000213642	0.00513252	0.712023	CG4050
FBgn0028985	0.214299	9.38879	5.34428	0.000213957	0.00513252	0.710518	Spn4
FBgn0033889	-0.136727	10.6943	-5.34108	0.000215028	0.00514844	0.705415	CG6701
FBgn0034031	0.557004	8.16152	5.33287	0.000217803	0.00519515	0.692322	CG12963
FBgn0042102	0.393209	7.01244	5.33326	0.000217669	0.00519515	0.692949	CG18745
FBgn0038566	-0.59233	6.75696	-5.32587	0.000220198	0.00524237	0.681151	CG14317
FBgn0034065	-0.240962	9.08725	-5.31778	0.000222998	0.00529904	0.668244	Rrp42
FBgn0038135	1.08168	8.21546	5.31226	0.000224934	0.00533499	0.659415	CG8773
FBgn0040259	0.227168	9.62308	5.30409	0.000227829	0.00539351	0.646355	Ugt86Da
FBgn0033304	0.33276	8.6247	5.29406	0.000231433	0.00546858	0.630322	Cyp6a13
FBgn0037934	0.786806	8.17956	5.29082	0.000232613	0.00547821	0.625127	CG6830
FBgn0039311	-0.632283	10.0285	-5.29056	0.000232709	0.00547821	0.624708	CG10513
FBgn0043841	-0.314096	8.02049	-5.28539	0.000234603	0.00551251	0.616429	vir-1
FBgn0000644	-0.342341	11.0795	-5.27438	0.00023869	0.00558879	0.59879	Fcp3C
FBgn0040069	0.544323	7.50789	5.27426	0.000238735	0.00558879	0.598596	vanin-like
FBgn0033379	-0.245194	9.54075	-5.26881	0.000240786	0.00562636	0.58986	Mys45A
FBgn0005670	0.962914	7.3316	5.26628	0.000241744	0.0056383	0.585805	Cyp4d1
FBgn0054003	0.326995	8.12417	5.26152	0.000243562	0.00567023	0.578152	nimB3
FBgn0024977	-0.212797	6.71409	-5.25797	0.000244924	0.00568257	0.572458	CG2709
FBgn0037742	0.216576	6.74576	5.25779	0.000244993	0.00568257	0.572171	Rpt3R
FBgn0030941	-0.349425	9.02102	-5.25018	0.000247942	0.00574042	0.559949	wgn
FBgn0036886	-0.242279	9.88089	-5.24545	0.000249793	0.00577269	0.552352	CG9300
FBgn0003308	0.46366	7.78777	5.2439	0.000250405	0.00577626	0.549852	ry
FBgn0041629	0.395266	9.15341	5.24217	0.000251088	0.00578145	0.54707	Hexo2
FBgn0031718	-0.375351	6.53726	-5.23628	0.000253427	0.0058071	0.5376	CG14014
FBgn0034229	0.481248	10.0063	5.23589	0.000253583	0.0058071	0.536972	CG4847
FBgn0040346	-0.200988	9.93598	-5.23724	0.000253047	0.0058071	0.539134	CG3704
FBgn0032713	0.232341	9.08358	5.22893	0.000256379	0.0058605	0.525773	CG17323
FBgn0020906	1.07848	10.5632	5.22344	0.000258611	0.00588686	0.516922	Jon25Bi
FBgn0026371	-0.193808	6.60988	-5.22154	0.000259385	0.00588686	0.513868	SAK
FBgn0028983	0.354237	9.03693	5.22037	0.000259865	0.00588686	0.51198	Spn6
FBgn0031261	0.275349	7.28162	5.22073	0.000259716	0.00588686	0.512569	nAcRbeta-21C
FBgn0051004	0.482313	9.09403	5.22145	0.00025942	0.00588686	0.51373	CG31004
FBgn0038610	0.274558	9.59581	5.21463	0.000262227	0.00592972	0.50274	CG7675
FBgn0051326	0.4342	8.0145	5.21166	0.00026346	0.00594695	0.497948	CG31326
FBgn0015527	-0.232653	8.26951	-5.21009	0.000264116	0.00595109	0.495412	pen
FBgn0027657	0.176896	11.1188	5.20721	0.000265318	0.00596719	0.490774	glob1
FBgn0031930	1.21328	7.33254	5.20535	0.000266102	0.00596719	0.48776	CG7025
FBgn0033787	0.525835	9.65236	5.205	0.000266249	0.00596719	0.487197	CG13321
FBgn0032945	0.285661	6.35477	5.20005	0.000268336	0.0060033	0.479222	CG8665
FBgn0000449	-0.153	6.69687	-5.1945	0.000270703	0.00603009	0.470253	dib
FBgn0003358	1.46979	9.23166	5.19388	0.000270967	0.00603009	0.469258	Jon99Ci
FBgn0040798	0.324712	8.19719	5.19425	0.000270811	0.00603009	0.469846	CG13069
FBgn0027106	0.25446	8.56836	5.1761	0.000278699	0.00619125	0.440525	inx7
FBgn0030098	2.48179	10.5114	5.16906	0.000281827	0.00624973	0.429128	CG12057
FBgn0030851	-0.234103	9.13338	-5.15987	0.000285963	0.00633031	0.414252	CG8326
FBgn0031929	1.58973	8.22694	5.15009	0.000290433	0.0064177	0.398413	CG18585
FBgn0032285	0.269977	12.314	5.14902	0.000290928	0.0064177	0.396675	CG17108
FBgn0030189	-0.136008	8.41817	-5.13135	0.000299212	0.00653797	0.368004	CG2909
FBgn0030859	0.398925	6.49383	5.13043	0.000299652	0.00653797	0.366503	CG12990
FBgn0031401	-0.178385	10.1406	-5.13287	0.000298492	0.00653797	0.370465	CG7082
FBgn0031529	0.199447	10.0604	5.12968	0.000300007	0.00653797	0.365295	CG9662
FBgn0034439	0.429656	7.49184	5.13335	0.000298262	0.00653797	0.371251	CG10062
FBgn0036501	0.399383	8.86995	5.13097	0.000299394	0.00653797	0.367384	CG7272
FBgn0039736	0.270801	6.87309	5.13361	0.00029814	0.00653797	0.37167	CG7912
FBgn0030775	1.02995	9.98038	5.12711	0.000301239	0.0065535	0.361111	CG9673
FBgn0037553	0.290461	7.5686	5.12371	0.000302872	0.00657769	0.35559	CG18249
FBgn0032131	0.434805	6.58671	5.11362	0.000307777	0.00667032	0.339187	CG3841
FBgn0035176	0.282387	7.88725	5.11276	0.000308194	0.00667032	0.337802	CG13905
FBgn0027082	-0.231853	7.98442	-5.1095	0.000309803	0.00668221	0.332488	Aats-pro
FBgn0033174	-0.337751	8.25516	-5.11027	0.000309421	0.00668221	0.333747	CG11125
FBgn0016974	-0.251336	6.67429	-5.10833	0.000310377	0.00668318	0.330595	swaPsi
FBgn0034642	0.290084	6.60934	5.10698	0.000311047	0.00668619	0.328394	CG15674
FBgn0033139	0.499225	7.40417	5.10504	0.000312012	0.00669551	0.325234	Tsp42Er
FBgn0033507	-0.260731	9.85634	-5.10359	0.000312735	0.00669965	0.322868	CG12909
FBgn0053120	0.327708	8.50262	5.09974	0.000314657	0.00672938	0.316615	CG33120
FBgn0004389	-0.261106	6.15832	-5.08412	0.0003226	0.00685544	0.291159	bnk
FBgn0030878	-0.180035	9.61848	-5.08319	0.00032308	0.00685544	0.289641	CG6769
FBgn0032833	-0.150702	12.3819	-5.08652	0.000321365	0.00685544	0.295076	CG10664
FBgn0034351	-0.206844	8.08772	-5.08381	0.000322758	0.00685544	0.290658	CG5190
FBgn0038484	1.40962	8.52997	5.08283	0.000323268	0.00685544	0.289049	CG5246
FBgn0031523	0.561622	8.3407	5.07909	0.000325203	0.00687338	0.282955	CG15408
FBgn0033963	0.270139	6.25477	5.07937	0.000325059	0.00687338	0.283406	CG12857
FBgn0011227	-0.217362	11.4258	-5.07535	0.00032715	0.00689145	0.27686	ox
FBgn0011236	-0.231557	10.2602	-5.07564	0.000326997	0.00689145	0.277337	ken
FBgn0028504	-0.302702	7.55879	-5.06888	0.00033055	0.00693421	0.266303	CG12182
FBgn0032087	0.903651	10.0531	5.06836	0.000330829	0.00693421	0.265444	CG9568
FBgn0035620	1.25443	7.56076	5.06946	0.000330245	0.00693421	0.267247	CG5150
FBgn0032770	0.355004	7.81729	5.06445	0.0003329	0.00696606	0.259071	CG13086
FBgn0041182	0.427219	9.60901	5.05351	0.000338783	0.00707741	0.241189	TepII
FBgn0029639	-0.344407	7.7725	-5.04674	0.000342476	0.00713096	0.230119	CG14419
FBgn0031968	0.367003	8.71566	5.04762	0.000341991	0.00713096	0.231567	CG7231
FBgn0036891	0.272978	8.55855	5.04361	0.000344197	0.00715499	0.225001	CG9372
FBgn0010220	-0.267684	9.2399	-5.04113	0.000345567	0.00717164	0.220948	Dbp45A
FBgn0036735	-0.20392	8.49765	-5.03848	0.000347039	0.00719037	0.216608	Edc3
FBgn0038790	0.757291	8.63952	5.0364	0.0003482	0.00719082	0.213197	MtnC
FBgn0039335	-0.160311	8.53405	-5.03723	0.000347737	0.00719082	0.214556	Vps33B
FBgn0031515	0.295518	6.90216	5.03472	0.000349139	0.00719842	0.210449	CG9664
FBgn0030847	0.184974	8.86908	5.03338	0.000349886	0.00720207	0.208265	CG12991
FBgn0039690	0.196536	9.00057	5.0267	0.000353659	0.00726787	0.197317	CG1969
FBgn0030005	0.29668	6.66622	5.02395	0.000355226	0.00727087	0.192804	CG2120
FBgn0031689	0.459914	8.0808	5.02341	0.000355534	0.00727087	0.19192	Cyp28d1
FBgn0050049	0.17057	6.41661	5.02524	0.000354491	0.00727087	0.194919	CG30049
FBgn0036742	0.298805	7.32563	5.01954	0.00035775	0.00730435	0.185577	CG7497
FBgn0243514	0.29765	6.5522	5.01778	0.000358762	0.00731319	0.182692	eater
FBgn0037065	0.477985	8.58152	5.01406	0.000360908	0.00734505	0.176606	CG12974
FBgn0037708	-0.1688	8.5554	-5.00873	0.000364013	0.00739633	0.16786	CG9386
FBgn0027872	-0.162129	9.7491	-5.00676	0.00036517	0.0074054	0.16462	rdgBbeta
FBgn0038702	0.989348	7.36966	5.00597	0.000365634	0.0074054	0.163326	CG3739
FBgn0035675	-0.284916	8.98167	-5.00426	0.000366639	0.00741386	0.160524	CG6610
FBgn0035089	0.570721	8.37283	5.00253	0.000367663	0.00742268	0.157675	Phk-3
FBgn0032820	0.275767	10.8348	5.00141	0.000368322	0.0074241	0.155849	fbp
FBgn0034214	-0.251761	9.11785	-4.99923	0.000369618	0.00743834	0.152263	CG6550
FBgn0031227	-0.313485	8.51481	-4.99472	0.000372311	0.00746985	0.144853	CG3709
FBgn0042101	0.253197	6.85566	4.99265	0.000373552	0.00746985	0.141457	CG18744
FBgn0050360	1.14819	8.72672	4.99351	0.000373037	0.00746985	0.142865	CG30360
FBgn0262109	-0.178227	10.3511	-4.99419	0.000372629	0.00746985	0.143981	CR42862
FBgn0035154	0.528683	10.7754	4.98819	0.000376248	0.00751186	0.134116	CG3344
FBgn0033476	0.151995	10.3871	4.98264	0.000379622	0.00756725	0.125004	oys
FBgn0030929	0.733127	9.3217	4.97751	0.000382776	0.00761808	0.11656	CG15043
FBgn0040503	0.302757	6.44456	4.97379	0.000385075	0.00765177	0.110447	CG7763
FBgn0035452	0.244986	6.63863	4.97211	0.000386122	0.00766051	0.107677	CG10359
FBgn0030611	-0.230555	8.74689	-4.96777	0.000388836	0.00767814	0.100527	CG15027
FBgn0035688	-0.132288	9.31659	-4.96859	0.000388322	0.00767814	0.101878	CG10289
FBgn0039774	0.607271	7.4037	4.96916	0.000387962	0.00767814	0.102824	CDase
FBgn0020506	0.378146	6.63849	4.96175	0.000392628	0.00772915	0.0906224	Amyrel
FBgn0032433	0.514444	7.53723	4.9598	0.000393869	0.00772915	0.0874001	Oatp33Ea
FBgn0038346	0.438756	8.53119	4.96013	0.000393658	0.00772915	0.0879487	CG14872
FBgn0051826	0.277781	7.28544	4.96017	0.000393629	0.00772915	0.0880221	CG31826
FBgn0020386	-0.242354	10.1893	-4.95506	0.000396892	0.00776432	0.0795969	Pk61C
FBgn0035607	0.26794	6.61164	4.95513	0.00039685	0.00776432	0.0797053	CG4835
FBgn0037504	-0.202581	9.62094	-4.95022	0.000400008	0.00781315	0.0716173	CG1142
FBgn0036659	0.321335	8.05869	4.94539	0.000403144	0.00786225	0.0636458	CG9701
FBgn0031249	1.13526	10.7936	4.94288	0.000404783	0.00786988	0.0595058	CG11911
FBgn0085313	0.369121	9.03179	4.94344	0.000404413	0.00786988	0.06044	CG34284
FBgn0051997	0.304101	9.99792	4.93322	0.000411157	0.00798151	0.043561	CG31997
FBgn0261259	0.394542	8.74141	4.93151	0.000412296	0.00799132	0.0407387	Fhos
FBgn0000928	-0.16848	6.64632	-4.9251	0.000416593	0.00806222	0.0301581	fs(1)Yb
FBgn0032701	-0.233048	9.15078	-4.91857	0.00042102	0.00812987	0.01937	CG10341
FBgn0035720	-0.165876	10.9359	-4.91805	0.000421377	0.00812987	0.0185058	CG10077
FBgn0038721	0.205648	8.64421	4.91203	0.000425511	0.0081971	0.00854229	CG16718
FBgn0002570	1.12665	9.39564	4.91002	0.000426899	0.0082113	0.00521993	LvpH
FBgn0037930	0.320455	10.2537	4.90723	0.000428835	0.00823597	0.000604006	CG14715
FBgn0031935	0.299439	7.26821	4.90527	0.0004302	0.00823712	-0.00263968	CG13793
FBgn0261989	0.97901	9.40663	4.90585	0.000429797	0.00823712	-0.00168273	CG42807
FBgn0261990	0.97901	9.40663	4.90585	0.000429797	0.00823712	-0.00168273	CG42808
FBgn0037336	-0.163902	9.58633	-4.9012	0.000433048	0.00827908	-0.00937165	CG2519
FBgn0036514	-0.206391	9.55236	-4.89494	0.00043747	0.00835097	-0.0197388	CG12301
FBgn0004047	0.142856	13.9941	4.88676	0.000443323	0.00844993	-0.0333008	Yp3
FBgn0260000	0.244924	7.09839	4.87823	0.000449507	0.00855488	-0.0474347	CG17570
FBgn0031277	1.03273	10.8554	4.87709	0.000450342	0.00855785	-0.0493271	CG13947
FBgn0035590	-0.180743	8.85368	-4.8758	0.000451291	0.008563	-0.0514757	CG10673
FBgn0033702	0.242801	6.64048	4.87207	0.000454036	0.00860215	-0.0576629	CG8854
FBgn0037765	0.457155	8.81731	4.87113	0.000454727	0.00860233	-0.0592148	CG9458
FBgn0051145	0.156394	7.29594	4.87007	0.000455509	0.00860422	-0.0609678	CG31145
FBgn0035679	0.364254	9.49952	4.86858	0.000456617	0.00861224	-0.0634446	CG10467
FBgn0038395	-0.206597	11.3555	-4.86563	0.000458812	0.00864074	-0.0683388	CG10407
FBgn0044810	0.324978	6.78171	4.86236	0.000461267	0.00867402	-0.0737829	TotX
FBgn0001254	0.56881	6.73408	4.85878	0.000463959	0.00871165	-0.0797182	ImpE2
FBgn0031459	0.2237	11.6477	4.85765	0.000464812	0.00871472	-0.081594	CG2862
FBgn0035976	-0.28483	8.36389	-4.85371	0.000467807	0.00875785	-0.0881463	PGRP-LC
FBgn0036857	0.400324	8.40969	4.84824	0.000471998	0.00882322	-0.0972449	CG9629
FBgn0039008	0.1554	7.19417	4.84143	0.000477262	0.00890842	-0.108558	CG6972
FBgn0031310	0.179885	9.38566	4.83994	0.000478423	0.0089169	-0.111037	CG4764
FBgn0026602	-0.336555	8.03063	-4.8362	0.000481352	0.00893192	-0.117264	Ady43A
FBgn0038552	-0.146344	9.61879	-4.83739	0.000480418	0.00893192	-0.115282	CG18012
FBgn0052191	0.297881	7.39778	4.83669	0.000480973	0.00893192	-0.11646	CG32191
FBgn0032408	-0.16246	10.3929	-4.83333	0.00048361	0.00896063	-0.122037	CG6712
FBgn0032733	0.297805	6.42933	4.83212	0.000484569	0.00896524	-0.124058	CG15170
FBgn0259101	0.482423	7.57194	4.83031	0.000486005	0.00897864	-0.127077	CG42249
FBgn0001174	-1.00014	6.85552	-4.82691	0.000488708	0.0090141	-0.132734	halo
FBgn0032264	0.56307	8.06269	4.8261	0.000489353	0.0090141	-0.13408	Lip4
FBgn0030807	-0.262004	6.59342	-4.81906	0.000495016	0.00910512	-0.145816	CG13000
FBgn0000289	-0.168835	10.241	-4.81397	0.00049915	0.00916779	-0.154298	cg
FBgn0032224	-0.163281	10.3838	-4.8117	0.000501007	0.00918012	-0.158085	Sps2
FBgn0034073	-0.207727	9.70214	-4.81137	0.000501276	0.00918012	-0.158633	CG8414
FBgn0001248	0.154276	12.3782	4.80683	0.000505012	0.00923514	-0.166208	Idh
FBgn0004463	-0.181257	8.51824	-4.80183	0.000509162	0.00929754	-0.174554	RpIII128
FBgn0031629	0.570374	9.66216	4.79002	0.0005191	0.00946533	-0.19427	CG3244
FBgn0261263	-0.206308	8.88551	-4.78807	0.000520758	0.00947173	-0.197521	scrib
FBgn0039929	-0.149696	11.3975	-4.78784	0.000520953	0.00947173	-0.197903	CG11076
FBgn0016675	0.664909	9.65963	4.78446	0.000523846	0.00948682	-0.203551	Lectin-galC1
FBgn0034879	-0.226773	9.52273	-4.78539	0.000523052	0.00948682	-0.202003	Rrp4
FBgn0037447	0.294559	9.15237	4.78424	0.000524038	0.00948682	-0.203925	Neurochondrin
FBgn0034290	-0.293133	10.6465	-4.77884	0.0005287	0.00955751	-0.212958	CG5773
FBgn0004666	-0.297213	8.24653	-4.77599	0.000531169	0.00958839	-0.217708	sim
FBgn0033540	-0.297486	8.24662	-4.77497	0.000532059	0.00959074	-0.219415	Elp2
FBgn0041723	-0.149196	6.89499	-4.7727	0.000534047	0.00961284	-0.223218	rho-5
FBgn0039527	-0.196178	7.12606	-4.76964	0.000536733	0.00964743	-0.228336	CG5639
FBgn0004654	0.217594	10.3822	4.76732	0.000538779	0.00965049	-0.232215	Pgd
FBgn0032596	0.137385	11.8241	4.76685	0.000539198	0.00965049	-0.233007	CG17331
FBgn0035383	0.169	9.54345	4.76743	0.000538687	0.00965049	-0.232041	CG2107
FBgn0010548	0.237744	9.74428	4.7623	0.00054324	0.00970906	-0.240623	Aldh-III
FBgn0038147	0.904416	8.64836	4.75854	0.000546606	0.00974299	-0.246923	CG14375
FBgn0039566	-0.163342	10.0097	-4.75845	0.000546682	0.00974299	-0.247064	CG4849
FBgn0022246	-0.241178	9.01642	-4.75522	0.000549588	0.00978096	-0.252471	Rpp30
FBgn0050033	-0.239264	7.55922	-4.74584	0.000558133	0.00991905	-0.268202	CG30033
FBgn0029148	-0.151993	11.6382	-4.74074	0.00056283	0.00998845	-0.276746	NHP2
FBgn0037996	0.584991	7.65172	4.73974	0.000563752	0.00999076	-0.278416	CG4830
FBgn0016926	-0.274456	11.1977	-4.73788	0.000565483	0.00999424	-0.281541	Pino
FBgn0038473	-0.179836	10.4421	-4.73783	0.000565532	0.00999424	-0.28163	ns1
FBgn0030310	0.301461	7.87072	4.733	0.000570044	0.0100599	-0.289732	PGRP-SA
FBgn0028540	-0.238971	9.03615	-4.73098	0.000571936	0.0100792	-0.29311	CG9008
FBgn0026061	0.221805	9.41769	4.72958	0.000573261	0.0100884	-0.29547	Mipp1
FBgn0020269	0.267806	7.08202	4.7232	0.000579315	0.0101808	-0.306179	mspo
FBgn0024361	0.547938	8.55078	4.72231	0.000580163	0.0101815	-0.30767	Tsp2A
FBgn0032642	0.183802	9.54831	4.71762	0.000584664	0.0102462	-0.315549	CG5110
FBgn0051321	0.203275	7.07694	4.71586	0.000586358	0.0102617	-0.318499	CG31321
FBgn0036018	-0.209476	9.09713	-4.71464	0.000587541	0.0102681	-0.320554	CG3335
FBgn0032194	-0.189574	10.2686	-4.71229	0.00058982	0.0102867	-0.324501	CG4901
FBgn0036422	0.773208	10.613	4.71187	0.000590236	0.0102867	-0.32522	CG3868
FBgn0259998	0.54194	11.1382	4.71027	0.00059179	0.0102996	-0.3279	CG17571
FBgn0031381	0.221676	11.4623	4.70819	0.000593824	0.0103208	-0.331398	Npc2a
FBgn0030774	0.946965	9.31188	4.70155	0.000600366	0.0104201	-0.342567	spheroide
FBgn0024558	-0.147036	11.5928	-4.69781	0.000604086	0.0104543	-0.348863	Dph5
FBgn0261710	-0.305639	11.0347	-4.69664	0.000605247	0.0104543	-0.35082	nocte
FBgn0030747	0.378826	7.15441	4.69624	0.000605648	0.0104543	-0.351495	CG4301
FBgn0033821	0.605952	9.10165	4.69719	0.000604698	0.0104543	-0.349895	CG10799
FBgn0010591	0.133416	10.9707	4.68995	0.00061197	0.010549	-0.36208	Sply
FBgn0027790	0.313887	8.39144	4.68597	0.000616013	0.0106042	-0.368793	GV1
FBgn0031422	0.192902	8.55389	4.68135	0.000620727	0.0106708	-0.376563	CG9870
FBgn0038597	-0.26704	8.85521	-4.68049	0.000621616	0.0106715	-0.378021	CG8064
FBgn0016123	0.293482	10.3572	4.67729	0.000624909	0.0107135	-0.383407	Aph-4
FBgn0036826	-0.239154	9.52566	-4.6757	0.000626559	0.0107272	-0.386093	CG3893
FBgn0039407	-0.2301	8.19939	-4.6704	0.000632074	0.0108069	-0.395026	CG14544
FBgn0051288	0.450013	8.65366	4.6649	0.000637854	0.010891	-0.404302	CG31288
FBgn0033548	-0.27069	10.5644	-4.66034	0.000642685	0.0109586	-0.411992	CG7637
FBgn0065032	0.390049	8.27316	4.65897	0.000644139	0.0109686	-0.414295	Arpc3B
FBgn0004052	-0.637399	6.45938	-4.65648	0.000646806	0.0109696	-0.418506	Z600
FBgn0010770	-0.256189	10.1686	-4.6571	0.000646141	0.0109696	-0.417458	ppan
FBgn0014931	-0.22395	8.76789	-4.65727	0.000645954	0.0109696	-0.417163	CG2678
FBgn0035024	-0.12544	10.2587	-4.6536	0.000649895	0.0110072	-0.423362	CG11414
FBgn0031621	-0.472457	6.49983	-4.64727	0.000656748	0.0111084	-0.434051	CG15634
FBgn0032665	0.488452	8.41959	4.64031	0.00066437	0.0112223	-0.44581	CG15152
FBgn0013772	0.401428	7.64871	4.63595	0.000669191	0.0112886	-0.453177	Cyp6a8
FBgn0003978	-0.150028	9.63925	-4.63404	0.000671316	0.0113093	-0.456406	vls
FBgn0032512	-0.258932	8.93515	-4.63221	0.00067336	0.0113286	-0.459505	CG9305
FBgn0031432	0.546432	7.24629	4.62957	0.000676317	0.0113632	-0.46397	Cyp309a1
FBgn0052280	0.250517	10.4774	4.62619	0.000680118	0.0114119	-0.469679	CG32280
FBgn0038381	-0.175969	9.46791	-4.62328	0.00068342	0.0114521	-0.474615	CG3303
FBgn0032215	0.27678	9.3422	4.62236	0.000684456	0.0114542	-0.476158	CG5385
FBgn0030351	0.145417	8.63333	4.61646	0.000691201	0.0115442	-0.486149	CG1840
FBgn0035588	0.205698	10.2086	4.61606	0.000691665	0.0115442	-0.486833	CG10672
FBgn0026415	0.14145	11.7061	4.61372	0.000694351	0.0115525	-0.490782	Idgf4
FBgn0029507	0.344497	9.81482	4.61389	0.000694156	0.0115525	-0.490496	Tsp42Ed
FBgn0036996	0.787419	10.5104	4.61324	0.000694906	0.0115525	-0.491595	CG5932
FBgn0030081	-0.167186	9.14319	-4.61241	0.000695866	0.0115532	-0.493002	CG7246
FBgn0038466	0.529192	8.28413	4.60995	0.000698722	0.0115854	-0.497175	CG8907
FBgn0029997	-0.171744	9.07314	-4.60469	0.000704853	0.0116717	-0.506075	CG2258
FBgn0051248	0.286067	8.1641	4.60006	0.000710309	0.0117466	-0.513931	CG31248
FBgn0033649	-0.241419	7.13123	-4.59117	0.000720901	0.0119062	-0.529009	pyr
FBgn0261284	-0.24282	8.48848	-4.58521	0.000728083	0.0120091	-0.539106	bou
FBgn0002719	0.199836	12.2249	4.58431	0.000729183	0.0120115	-0.540644	Men
FBgn0027550	0.264636	7.33144	4.58	0.000734432	0.0120351	-0.547949	CG6495
FBgn0032154	-0.20919	9.1699	-4.58219	0.00073176	0.0120351	-0.544237	CG5924
FBgn0035151	-0.276879	9.08101	-4.58001	0.000734429	0.0120351	-0.547946	CG17129
FBgn0039872	0.373155	9.79075	4.58141	0.000732715	0.0120351	-0.545566	salt
FBgn0001208	0.368722	10.5852	4.57489	0.000740719	0.0120777	-0.556632	Hn
FBgn0261617	-0.226524	10.1305	-4.57551	0.000739957	0.0120777	-0.555583	nej
FBgn0033789	0.490717	6.97601	4.57478	0.000740858	0.0120777	-0.556823	CG13324
FBgn0039719	0.137503	7.22583	4.57533	0.000740175	0.0120777	-0.555883	CG15515
FBgn0036686	-0.18677	9.56303	-4.57143	0.000745002	0.0121296	-0.562504	CG7728
FBgn0051636	0.218057	6.56773	4.57061	0.000746018	0.0121305	-0.563892	CG31636
FBgn0035619	1.40011	8.31288	4.56705	0.000750466	0.0121871	-0.569947	CG10592
FBgn0051119	-0.228734	7.34799	-4.56562	0.000752253	0.0122004	-0.572369	HdacX
FBgn0029892	-0.326244	8.23132	-4.56234	0.000756383	0.0122359	-0.577944	CG3184
FBgn0031777	-0.183828	7.94235	-4.56309	0.000755439	0.0122359	-0.576673	CG9154
FBgn0030855	-0.183831	9.51365	-4.55884	0.000760821	0.012292	-0.583903	CG5800
FBgn0004556	-0.17273	9.05871	-4.55709	0.000763045	0.0123121	-0.586875	Dbp73D
FBgn0031399	-0.11965	8.87209	-4.55489	0.000765849	0.0123416	-0.59061	mio
FBgn0031313	0.297648	9.40799	4.55394	0.000767068	0.0123455	-0.592231	CG5080
FBgn0085261	0.492501	8.35908	4.55291	0.000768385	0.0123509	-0.593977	CG34232
FBgn0026144	-0.145056	10.8595	-4.54748	0.000775394	0.0124363	-0.603225	CBP
FBgn0035099	-0.218167	7.77183	-4.54727	0.000775669	0.0124363	-0.603585	CG6845
FBgn0036945	0.519235	9.56057	4.54539	0.000778098	0.0124594	-0.606769	CG6981
FBgn0031107	-0.249574	8.73853	-4.54217	0.000782304	0.0125109	-0.612259	HERC2
FBgn0012037	0.783852	9.20234	4.5405	0.000784496	0.0125301	-0.615108	Ance
FBgn0035780	0.156299	6.68163	4.53922	0.000786167	0.0125409	-0.617275	CG18417
FBgn0034269	-0.136556	10.0323	-4.53655	0.000789683	0.0125801	-0.621818	CG6406
FBgn0045761	0.221652	8.42536	4.53585	0.000790618	0.0125801	-0.623023	CHKov1
FBgn0031069	0.160262	10.8335	4.53379	0.000793339	0.0126075	-0.626522	CG12703
FBgn0040531	0.316389	7.83819	4.53265	0.000794863	0.0126158	-0.628475	CG11741
FBgn0032412	0.374798	7.78447	4.53071	0.000797446	0.0126251	-0.631779	CG16996
FBgn0033375	-0.167767	8.54834	-4.53135	0.000796592	0.0126251	-0.630689	CG8078
FBgn0035199	0.246402	6.76658	4.52855	0.000800324	0.0126548	-0.635448	CG9134
FBgn0028381	0.446948	8.29529	4.52694	0.000802492	0.0126731	-0.638201	decay
FBgn0038903	-0.171065	10.1434	-4.52605	0.000803687	0.0126762	-0.639716	RpI12
FBgn0030993	0.508702	7.88294	4.52287	0.000807968	0.0127278	-0.645126	Mec2
FBgn0032138	-0.27948	11.6938	-4.52009	0.000811746	0.0127713	-0.649875	CG4364
FBgn0030051	-0.17074	7.19708	-4.51515	0.00081849	0.0128614	-0.658299	spirit
FBgn0000463	-0.182096	8.40055	-4.51358	0.000820638	0.0128791	-0.660967	Dl
FBgn0086251	-0.184687	10.8652	-4.51041	0.000825018	0.0129318	-0.666386	del
FBgn0000227	-0.676216	6.61752	-4.50463	0.000833044	0.0130292	-0.676242	Bsg25A
FBgn0030720	-0.281151	9.40229	-4.50371	0.000834329	0.0130292	-0.677811	CG8939
FBgn0034276	0.180416	6.52408	4.50385	0.000834134	0.0130292	-0.677572	CG6385
FBgn0037879	-0.15231	6.47155	-4.50059	0.0008387	0.0130812	-0.68313	scpr-C
FBgn0031002	0.241733	7.93271	4.49399	0.000848038	0.0132105	-0.6944	CG14196
FBgn0025885	0.267675	11.0943	4.49131	0.000851861	0.0132253	-0.698979	Inos
FBgn0028518	0.211043	7.43539	4.49165	0.000851382	0.0132253	-0.698406	CG18480
FBgn0039140	-0.14183	10.077	-4.49113	0.000852131	0.0132253	-0.699301	Miro
FBgn0000261	0.284599	11.3089	4.48817	0.000856361	0.0132747	-0.704342	Cat
FBgn0037974	0.194244	6.43766	4.48489	0.000861097	0.0133317	-0.709955	CG12224
FBgn0032603	0.392729	7.95273	4.47894	0.000869751	0.0134492	-0.720133	CG17928
FBgn0001098	0.141112	12.1517	4.47684	0.000872813	0.01348	-0.723709	Gdh
FBgn0038701	0.413886	10.278	4.47526	0.000875142	0.0134994	-0.726422	CG18493
FBgn0039851	0.333803	6.26092	4.47361	0.000877572	0.0135204	-0.729244	mey
FBgn0003149	0.252533	9.87689	4.46997	0.000882955	0.0135867	-0.735467	Prm
FBgn0040813	0.191271	13.3775	4.46647	0.000888164	0.0136502	-0.741454	Nplp2
FBgn0033138	0.292808	8.07606	4.46496	0.00089043	0.0136684	-0.744047	Tsp42Eq
FBgn0002566	-0.114006	10.0106	-4.46367	0.000892356	0.0136813	-0.746245	lt
FBgn0032507	-0.242944	7.72094	-4.45885	0.000899631	0.0137761	-0.754508	CG9377
FBgn0032803	0.200504	6.57387	4.45764	0.000901463	0.0137875	-0.756578	CG13082
FBgn0032819	-0.234077	8.87042	-4.44944	0.000913985	0.0139452	-0.770615	CG10463
FBgn0038984	0.28133	11.0938	4.4498	0.000913433	0.0139452	-0.77	CG5315
FBgn0034247	0.426907	7.98283	4.44787	0.000916406	0.0139652	-0.773307	CG6484
FBgn0028707	-0.164517	7.65153	-4.44627	0.000918871	0.0139728	-0.77604	Mt2
FBgn0032363	-0.22214	9.4689	-4.4454	0.000920222	0.0139728	-0.777535	CG6509
FBgn0039756	0.383226	8.20974	4.44562	0.000919892	0.0139728	-0.77717	CG9743
FBgn0033246	0.198129	11.5359	4.43776	0.000932152	0.014103	-0.79064	ACC
FBgn0051807	0.204791	6.80033	4.43793	0.000931886	0.014103	-0.79035	CG31807
FBgn0260653	0.64143	7.96396	4.43895	0.000930279	0.014103	-0.788594	serp
FBgn0034293	0.472814	7.4408	4.43159	0.00094189	0.0142333	-0.801214	CG14495
FBgn0034382	0.472308	8.84417	4.42807	0.000947508	0.014301	-0.807264	CG18609
FBgn0039748	-0.249621	7.31074	-4.42498	0.000952458	0.0143586	-0.812564	CG15529
FBgn0032521	-0.213434	9.46757	-4.41871	0.000962575	0.0144938	-0.823314	CG7110
FBgn0005590	-0.238415	6.36701	-4.41671	0.000965841	0.0145234	-0.826759	scw
FBgn0026563	0.184202	6.5147	4.41609	0.000966843	0.0145234	-0.827814	CG1979
FBgn0029826	0.29586	7.48828	4.41206	0.000973455	0.0146053	-0.834746	CG6041
FBgn0004449	0.173001	7.93545	4.41	0.00097684	0.0146387	-0.838277	Ten-m
FBgn0033638	-0.171962	9.29253	-4.40377	0.000987185	0.0147762	-0.848992	CG9005
FBgn0027590	0.255457	11.5425	4.3988	0.000995498	0.0148829	-0.857521	CG16936
FBgn0040637	0.230905	7.80879	4.39614	0.000999989	0.0149147	-0.862099	CG11458
FBgn0051223	-0.167608	8.54747	-4.39665	0.000999127	0.0149147	-0.861222	CG31223
FBgn0029771	0.241016	8.01253	4.3914	0.00100805	0.0150172	-0.870262	CG12730
FBgn0052579	-0.180522	8.00678	-4.38633	0.00101673	0.0151286	-0.87898	CG32579
FBgn0260450	-0.180522	8.00678	-4.38633	0.00101673	0.0151286	-0.87898	CalpC
FBgn0032815	-0.254825	9.94719	-4.38428	0.00102026	0.0151632	-0.882504	CG10462
FBgn0035544	0.295216	7.8646	4.38346	0.00102167	0.0151664	-0.883913	CG15021
FBgn0037788	0.235221	9.86532	4.38121	0.00102558	0.0152065	-0.887796	CG3940
FBgn0031393	-0.247309	6.66105	-4.37991	0.00102783	0.015222	-0.890024	CG15382
FBgn0033047	0.533234	8.21969	4.37787	0.00103138	0.0152389	-0.893535	CG7882
FBgn0033786	0.344548	7.75705	4.37809	0.00103099	0.0152389	-0.89315	CG3884
FBgn0037751	-0.127889	6.22878	-4.37628	0.00103416	0.0152621	-0.896272	topi
FBgn0028394	-0.153267	8.19011	-4.37348	0.00103909	0.0152989	-0.901101	CG17834
FBgn0031034	0.34511	7.08851	4.37351	0.00103904	0.0152989	-0.901053	CG14205
FBgn0030575	0.346153	8.66652	4.37094	0.00104356	0.0153291	-0.905472	CG5321
FBgn0033584	-0.200422	10.1349	-4.37154	0.0010425	0.0153291	-0.904436	CG7737
FBgn0028420	-0.175991	8.43538	-4.36836	0.00104813	0.0153648	-0.90991	Kr-h1
FBgn0040551	0.135825	8.97651	4.36819	0.00104843	0.0153648	-0.910203	CG11686
FBgn0029823	-0.14464	11.8256	-4.36521	0.00105375	0.0154051	-0.915351	CG3011
FBgn0030237	0.461631	8.10396	4.36554	0.00105315	0.0154051	-0.914769	CG15209
FBgn0038922	-0.163842	10.6336	-4.3646	0.00105484	0.0154051	-0.916402	CG6439
FBgn0015572	0.227009	6.73889	4.36391	0.00105607	0.0154052	-0.917583	alpha-Est4
FBgn0001311	0.241836	6.60554	4.36213	0.00105926	0.0154251	-0.920654	kkv
FBgn0035981	-0.122826	10.1197	-4.36179	0.00105988	0.0154251	-0.921244	CG4452
FBgn0040282	-0.202395	9.41934	-4.35922	0.0010645	0.0154745	-0.925667	SP1029
FBgn0261434	-0.306571	6.34626	-4.35782	0.00106703	0.0154934	-0.928081	hkb
FBgn0030519	0.308218	11.2456	4.35708	0.00106837	0.015495	-0.929356	CG11151
FBgn0051157	0.174926	6.45086	4.35575	0.00107077	0.015512	-0.93164	CG31157
FBgn0033205	0.387856	8.18565	4.35096	0.00107951	0.0156202	-0.939907	CG2064
FBgn0035189	0.387839	9.4677	4.35031	0.00108071	0.0156202	-0.941035	CG9119
FBgn0023535	0.399954	8.43803	4.33976	0.00110024	0.0158842	-0.959237	arg
FBgn0038306	-0.211035	9.68174	-4.33278	0.00111335	0.0160551	-0.971277	Art3
FBgn0086130	-0.167717	8.96017	-4.33179	0.00111523	0.0160638	-0.972991	KH1
FBgn0052485	-0.14638	8.6055	-4.32895	0.00112063	0.0161233	-0.977904	CG32485
FBgn0033297	0.576323	6.79903	4.32532	0.00112756	0.0161861	-0.984171	CG8690
FBgn0038038	0.204631	9.74076	4.32589	0.00112647	0.0161861	-0.983188	CG5167
FBgn0042137	0.148073	6.55539	4.32301	0.00113199	0.0162312	-0.988157	CG18814
FBgn0037659	-0.198576	9.81557	-4.31567	0.00114622	0.0164166	-1.00085	CG11033
FBgn0001325	-0.227859	6.05181	-4.31333	0.00115078	0.0164632	-1.00489	Kr
FBgn0019960	-0.114043	10.5964	-4.30965	0.00115801	0.0165291	-1.01125	CG6455
FBgn0051720	0.201127	6.45153	4.31029	0.00115676	0.0165291	-1.01015	CG31720
FBgn0030156	-0.306595	7.33725	-4.30851	0.00116026	0.0165425	-1.01322	CG15247
FBgn0031971	-0.268349	10.5922	-4.30686	0.00116352	0.0165703	-1.01607	CG7224
FBgn0004859	-0.222248	7.69395	-4.29734	0.00118255	0.0168062	-1.03255	ci
FBgn0039313	0.403539	11.0971	4.29724	0.00118275	0.0168062	-1.03273	CG11892
FBgn0025683	0.193313	11.4371	4.29592	0.0011854	0.016825	-1.03501	CG3164
FBgn0028429	-0.230751	9.80056	-4.29312	0.00119108	0.0168778	-1.03986	I-2
FBgn0033760	0.473059	8.06728	4.29276	0.0011918	0.0168778	-1.04047	CG8785
FBgn0001229	0.173746	6.79098	4.29194	0.00119348	0.0168826	-1.0419	Hsp67Bc
FBgn0036023	0.665656	7.41613	4.29026	0.0011969	0.016912	-1.04481	CG18179
FBgn0039044	-0.131652	6.84518	-4.28656	0.00120445	0.0169998	-1.0512	p53
FBgn0026206	-0.142377	10.1196	-4.28455	0.0012086	0.0170256	-1.0547	mei-P26
FBgn0031881	-0.133208	8.54671	-4.28436	0.00120898	0.0170256	-1.05502	CG3476
FBgn0260746	-0.297209	8.41334	-4.28219	0.00121347	0.0170697	-1.05878	Ect3
FBgn0032634	-0.146151	10.5581	-4.28083	0.00121629	0.0170903	-1.06114	Rpb11
FBgn0031097	0.761332	6.90212	4.27574	0.00122689	0.0172201	-1.06995	obst-A
FBgn0001285	0.706723	10.3713	4.2715	0.00123581	0.0173261	-1.07731	Jon44E
FBgn0061492	0.143021	10.6037	4.26775	0.00124374	0.0174179	-1.08381	loj
FBgn0035890	-0.216315	8.21072	-4.26398	0.00125176	0.0175108	-1.09034	CG13667
FBgn0037217	-0.231309	7.54866	-4.26262	0.00125467	0.0175321	-1.0927	CG14636
FBgn0053258	0.355276	9.7058	4.26158	0.00125692	0.017544	-1.09451	CG33258
FBgn0034075	0.189525	8.44541	4.26018	0.00125993	0.0175509	-1.09694	Asph
FBgn0035091	0.280427	8.94257	4.26005	0.00126019	0.0175509	-1.09715	CG3829
FBgn0035422	-0.16477	10.6415	-4.25939	0.00126163	0.0175515	-1.09831	RpL28
FBgn0023540	0.141188	9.91063	4.25662	0.0012676	0.0176152	-1.10311	CG3630
FBgn0036589	0.34549	7.97127	4.2548	0.00127155	0.0176507	-1.10627	CG13067
FBgn0028523	-0.266081	8.2072	-4.25177	0.00127815	0.0177228	-1.11153	CG5888
FBgn0034623	-0.223325	6.67439	-4.24828	0.0012858	0.0178092	-1.11758	CG9822
FBgn0030746	0.264356	6.34689	4.24545	0.00129203	0.0178564	-1.1225	CG9981
FBgn0037235	-0.131751	10.8854	-4.24606	0.00129068	0.0178564	-1.12143	CG1103
FBgn0032652	-0.466283	9.13196	-4.24322	0.00129698	0.0179052	-1.12638	CG6870
FBgn0026259	-0.199124	10.859	-4.24181	0.00130009	0.0179285	-1.12881	eIF5B
FBgn0033674	0.200888	7.23199	4.23972	0.00130476	0.0179621	-1.13245	CG8964
FBgn0035043	0.294945	7.50376	4.23912	0.00130611	0.0179621	-1.1335	CG4781
FBgn0050438	0.460641	7.30404	4.23881	0.0013068	0.0179621	-1.13404	CG30438
FBgn0034126	-0.296122	7.82867	-4.23501	0.00131531	0.0180594	-1.14062	CG4398
FBgn0003963	-0.212003	8.47288	-4.22853	0.00132998	0.0182385	-1.15188	ush
FBgn0036321	0.915553	8.56008	4.22798	0.00133125	0.0182385	-1.15285	CG14120
FBgn0024807	-0.180144	8.61759	-4.22656	0.00133448	0.0182578	-1.15532	DIP1
FBgn0033661	-0.155124	10.2525	-4.22609	0.00133555	0.0182578	-1.15613	CG13185
FBgn0051313	0.455481	10.4539	4.22528	0.00133741	0.0182634	-1.15754	CG31313
FBgn0051388	-0.149915	8.07074	-4.22433	0.00133958	0.0182733	-1.15919	CG31388
FBgn0037061	-0.152598	9.54922	-4.22243	0.00134396	0.0183132	-1.1625	CG12975
FBgn0037786	0.141908	6.65691	4.22139	0.00134635	0.018326	-1.1643	CG5361
FBgn0032136	0.287888	10.7047	4.21971	0.00135022	0.0183391	-1.16722	CG15828
FBgn0039417	-0.168683	9.39908	-4.21979	0.00135003	0.0183391	-1.16708	CG6073
FBgn0031734	0.319242	9.17974	4.21449	0.00136236	0.0184842	-1.17631	CG11147
FBgn0034736	0.208683	6.90387	4.21248	0.00136707	0.0185281	-1.17981	CG6018
FBgn0003429	0.243371	8.05637	4.21149	0.00136937	0.0185394	-1.18152	slo
FBgn0031037	0.226006	10.6689	4.21058	0.00137152	0.0185486	-1.18311	HspB8
FBgn0014022	-0.182552	8.643	-4.20771	0.00137828	0.0186161	-1.1881	Rlb1
FBgn0033593	-0.513585	8.47614	-4.20688	0.00138023	0.0186161	-1.18954	Listericin
FBgn0038869	-0.239974	9.22941	-4.20659	0.00138094	0.0186161	-1.19006	CG3353
FBgn0037678	0.547682	9.82697	4.20555	0.00138339	0.0186292	-1.19185	CG16749
FBgn0031657	-0.172168	9.68182	-4.20431	0.00138635	0.0186492	-1.19402	CG3756
FBgn0031518	0.157067	6.55979	4.19998	0.00139667	0.0187475	-1.20155	CG3277
FBgn0039305	-0.169048	9.29204	-4.19938	0.00139811	0.0187475	-1.2026	CG11858
FBgn0039306	-0.229251	9.892	-4.20043	0.0013956	0.0187475	-1.20078	CG11859
FBgn0026374	0.257523	7.40905	4.19524	0.00140808	0.0187604	-1.20981	Rhp
FBgn0030266	-0.292057	8.07441	-4.19466	0.00140948	0.0187604	-1.21082	CG11122
FBgn0033269	0.499914	9.43354	4.19619	0.00140578	0.0187604	-1.20815	CG8709
FBgn0034471	-0.291434	8.94472	-4.19779	0.00140194	0.0187604	-1.20537	Obp56e
FBgn0035336	-0.177679	9.23806	-4.19756	0.00140248	0.0187604	-1.20577	CG9004
FBgn0037818	0.224581	8.19725	4.19555	0.00140733	0.0187604	-1.20927	CG6465
FBgn0039102	0.333049	8.96169	4.1957	0.00140697	0.0187604	-1.20901	SPE
FBgn0040725	0.176828	6.14529	4.18986	0.00142114	0.0188956	-1.21918	CG13946
FBgn0001217	0.307042	6.63787	4.18811	0.00142541	0.0189125	-1.22222	Hsc70-2
FBgn0038832	0.283248	7.19141	4.18856	0.00142432	0.0189125	-1.22145	CG15695
FBgn0036362	-0.505343	10.0722	-4.18541	0.00143204	0.0189805	-1.22693	CG10725
FBgn0039936	-0.122827	11.852	-4.18097	0.001443	0.0191057	-1.23467	CG11148
FBgn0031610	-0.239055	9.07369	-4.17512	0.00145757	0.0192785	-1.24487	CG15436
FBgn0030834	-0.186935	9.41672	-4.17246	0.00146426	0.0193397	-1.24951	CG8675
FBgn0033754	-0.19864	9.68552	-4.17161	0.00146641	0.0193397	-1.251	Ak6
FBgn0038035	-0.195237	8.04328	-4.17145	0.0014668	0.0193397	-1.25127	lig3
FBgn0028948	0.199081	6.34196	4.17037	0.00146953	0.0193554	-1.25315	CG15253
FBgn0036997	0.233953	7.41172	4.16932	0.00147218	0.0193562	-1.25498	CG5955
FBgn0039099	0.181704	9.95526	4.16913	0.00147266	0.0193562	-1.25531	CG10157
FBgn0034580	-0.302181	8.75289	-4.16847	0.00147433	0.0193581	-1.25647	Cht8
FBgn0037163	-0.303753	8.21297	-4.16581	0.00148108	0.0194265	-1.2611	laza
FBgn0050440	-0.18629	9.77839	-4.16371	0.00148646	0.0194767	-1.26477	CG30440
FBgn0022770	0.209397	6.7944	4.16111	0.00149311	0.0195437	-1.26931	Peritrophin-A
FBgn0025140	-0.186373	10.8436	-4.1599	0.00149623	0.0195577	-1.27142	pit
FBgn0047199	-0.16146	9.2037	-4.15949	0.00149728	0.0195577	-1.27214	CG31517
FBgn0031012	0.316961	7.67985	4.15826	0.00150044	0.0195654	-1.27427	CG8051
FBgn0031494	-0.171245	7.81773	-4.15806	0.00150098	0.0195654	-1.27464	CG17219
FBgn0032913	0.373654	10.5615	4.15678	0.00150428	0.0195883	-1.27687	CG9259
FBgn0031636	-0.460674	8.2229	-4.15614	0.00150594	0.0195896	-1.27798	CG12194
FBgn0001332	-0.156388	11.3272	-4.15431	0.00151068	0.0196311	-1.28117	L
FBgn0260750	-0.137768	9.11252	-4.1537	0.00151228	0.0196317	-1.28225	CG31873
FBgn0032150	-0.183671	8.14279	-4.15242	0.00151561	0.0196547	-1.28448	CG13123
FBgn0053138	0.19603	11.136	4.1491	0.00152431	0.0197471	-1.29028	CG33138
FBgn0085833	-0.172973	9.8746	-4.14576	0.00153308	0.0198404	-1.2961	CR42206
FBgn0014000	0.394439	9.58728	4.1445	0.00153642	0.0198633	-1.29831	Hf
FBgn0030087	-0.119424	11.1131	-4.1406	0.00154677	0.0199766	-1.30512	CG7766
FBgn0259144	-0.135185	8.24786	-4.13986	0.00154875	0.0199817	-1.30642	CG42259
FBgn0085282	0.142073	7.55108	4.13377	0.00156507	0.0201716	-1.31705	CG34253
FBgn0050502	0.391766	8.01837	4.1306	0.00157365	0.0202616	-1.32259	CG30502
FBgn0038277	-0.113922	13.4683	-4.12931	0.00157715	0.020286	-1.32485	RpS5b
FBgn0036935	-0.221713	7.15929	-4.12849	0.0015794	0.0202942	-1.32629	CG14186
FBgn0038504	-0.168873	8.05571	-4.12777	0.00158135	0.0202986	-1.32754	Sur-8
FBgn0031500	-0.148533	8.09053	-4.12583	0.00158665	0.0203459	-1.33094	CG17221
FBgn0261341	0.606669	7.74274	4.1245	0.0015903	0.020372	-1.33326	verm
FBgn0023479	0.146361	7.17718	4.12353	0.00159296	0.0203854	-1.33496	Tequila
FBgn0042105	0.244551	6.77918	4.12193	0.00159736	0.020421	-1.33775	CG18748
FBgn0053099	0.189596	7.97309	4.12008	0.00160245	0.0204654	-1.34098	CG33099
FBgn0032919	-0.189529	10.8549	-4.11885	0.00160586	0.0204674	-1.34314	CG9253
FBgn0047135	0.124407	12.7435	4.11923	0.00160481	0.0204674	-1.34247	CG32276
FBgn0040104	-0.444798	6.99177	-4.11671	0.00161181	0.0205225	-1.34688	lectin-24A
FBgn0035707	-0.20036	9.68455	-4.1108	0.00162833	0.0206926	-1.35722	CG8368
FBgn0047133	0.173147	8.53453	4.11076	0.00162845	0.0206926	-1.3573	pncr003:2L
FBgn0035854	-0.210227	8.62246	-4.10838	0.00163515	0.0207568	-1.36146	CG8005
FBgn0040582	0.489177	9.0059	4.10042	0.00165778	0.0210229	-1.37539	CG5791
FBgn0032465	0.138687	9.47799	4.0998	0.00165957	0.0210245	-1.37649	CG12404
FBgn0020910	-0.169116	9.3113	-4.09828	0.00166392	0.0210585	-1.37914	RpL3
FBgn0036862	-0.208421	7.33885	-4.09651	0.001669	0.0210806	-1.38223	CG9619
FBgn0050377	-0.191848	10.0804	-4.09678	0.00166825	0.0210806	-1.38178	CG30377
FBgn0037536	-0.127177	10.9442	-4.09533	0.00167243	0.0211027	-1.38431	CG2698
FBgn0034062	-0.251812	8.7739	-4.0917	0.00168294	0.0212142	-1.39066	CG8388
FBgn0033554	-0.178899	8.27298	-4.08833	0.00169279	0.0212844	-1.39657	Lsm10
FBgn0034330	-0.271017	8.90187	-4.08895	0.00169097	0.0212844	-1.39549	CG18107
FBgn0037105	-0.169051	8.6825	-4.08806	0.00169358	0.0212844	-1.39705	S1P
FBgn0003890	0.173324	9.59884	4.08639	0.00169847	0.0213035	-1.39997	betaTub97EF
FBgn0010425	0.969923	10.8537	4.0865	0.00169814	0.0213035	-1.39977	epsilonTry
FBgn0027529	-0.218643	9.15873	-4.08352	0.0017069	0.021388	-1.40499	CG8920
FBgn0038897	0.269008	7.01294	4.08251	0.00170989	0.0214042	-1.40677	CG5849
FBgn0038115	0.212328	9.13491	4.08133	0.00171341	0.0214269	-1.40885	CG7966
FBgn0039319	0.337983	7.25697	4.07863	0.00172141	0.0215057	-1.41357	CG13659
FBgn0020305	-0.220552	9.47765	-4.07656	0.0017276	0.0215199	-1.41721	dbe
FBgn0032487	-0.149825	9.42796	-4.07663	0.00172739	0.0215199	-1.41708	Ski6
FBgn0051716	-0.113436	11.3566	-4.07653	0.00172767	0.0215199	-1.41725	CG31716
FBgn0036909	-0.122489	10.5667	-4.07462	0.0017334	0.0215701	-1.4206	CG15881
FBgn0004512	0.356501	8.28329	4.07391	0.00173553	0.0215753	-1.42185	Mdr49
FBgn0032688	-0.12553	7.99323	-4.0732	0.00173767	0.0215806	-1.4231	CG15160
FBgn0011259	-0.268588	7.8639	-4.07163	0.0017424	0.0216181	-1.42585	Sema-1a
FBgn0036470	0.569634	6.91791	4.0686	0.00175156	0.0217104	-1.43116	CG13463
FBgn0011674	-0.371902	8.08404	-4.063	0.00176862	0.0218687	-1.44098	insc
FBgn0032253	0.587957	7.27017	4.06255	0.00177	0.0218687	-1.44178	CG5322
FBgn0035434	0.289543	8.87011	4.06193	0.00177191	0.0218687	-1.44286	dro5
FBgn0036258	-0.128903	12.6731	-4.06366	0.00176661	0.0218687	-1.43983	CG5642
FBgn0261276	-0.155015	9.94419	-4.06157	0.001773	0.0218687	-1.44349	opa1-like
FBgn0053532	-0.42764	8.28983	-4.06053	0.00177621	0.0218869	-1.44532	lectin-37Da
FBgn0037992	0.347014	6.93007	4.05904	0.00178081	0.0219221	-1.44794	CG4702
FBgn0001330	-0.223041	8.86242	-4.05809	0.00178373	0.0219367	-1.4496	kz
FBgn0038858	0.177997	10.0424	4.05698	0.00178716	0.0219575	-1.45155	CG5793
FBgn0034582	0.932132	8.95961	4.05002	0.00180883	0.0222022	-1.46376	Cht9
FBgn0085227	0.19433	7.57415	4.04663	0.00181951	0.0223115	-1.46972	CG34198
FBgn0031308	-0.214702	9.2508	-4.04456	0.00182606	0.0223701	-1.47336	CG4749
FBgn0027453	0.149494	9.33519	4.0425	0.00183258	0.0224282	-1.47697	Dnz1
FBgn0003057	0.545938	7.40566	4.04189	0.00183453	0.0224303	-1.47805	CG10598
FBgn0027560	0.179553	12.0377	4.03898	0.0018438	0.0225029	-1.48315	Tps1
FBgn0053265	0.343858	7.35502	4.03891	0.00184403	0.0225029	-1.48328	Muc68E
FBgn0033741	-0.213585	11.1122	-4.03823	0.00184621	0.0225077	-1.48448	CG8545
FBgn0039321	0.418363	9.57714	4.03603	0.00185326	0.0225501	-1.48833	CG10550
FBgn0085483	0.433542	8.28548	4.03615	0.00185287	0.0225501	-1.48812	CG34454
FBgn0031533	0.5035	6.91649	4.03506	0.00185639	0.0225664	-1.49005	CG2772
FBgn0036557	-0.122303	10.2643	-4.03427	0.00185894	0.0225756	-1.49143	mRpS31
FBgn0051150	0.268119	8.49223	4.03154	0.00186775	0.0226608	-1.49622	CG31150
FBgn0027086	-0.170113	11.0872	-4.03003	0.00187267	0.0226987	-1.49889	Aats-ile
FBgn0034237	-0.102996	12.3116	-4.02871	0.00187696	0.02271	-1.5012	eIF3-S9
FBgn0041184	-0.145613	8.35636	-4.02863	0.0018772	0.02271	-1.50133	Socs36E
FBgn0024330	-0.157095	9.40463	-4.02542	0.00188771	0.022813	-1.50699	MED6
FBgn0032679	-0.173977	10.2716	-4.02437	0.00189114	0.022813	-1.50883	bsf
FBgn0035036	-0.152982	8.40943	-4.02478	0.0018898	0.022813	-1.50811	CG4707
FBgn0035734	0.141538	6.98734	4.02292	0.00189592	0.0228488	-1.51138	CG14823
FBgn0038194	0.5938	10.7524	4.02149	0.00190064	0.0228838	-1.5139	Cyp6d5
FBgn0032051	-0.241687	10.3102	-4.0194	0.00190754	0.0229232	-1.51757	CG13097
FBgn0040832	0.393399	8.89598	4.01962	0.0019068	0.0229232	-1.51717	CG8012
FBgn0010383	-0.235278	8.94031	-4.01664	0.0019167	0.0229733	-1.52242	Cyp18a1
FBgn0025709	0.525398	8.07277	4.0165	0.00191717	0.0229733	-1.52267	CG8083
FBgn0031018	0.940956	7.46571	4.0172	0.00191484	0.0229733	-1.52144	CG12200
FBgn0028988	0.297809	8.85202	4.01445	0.00192402	0.0229899	-1.52628	Spn1
FBgn0032149	-0.206417	8.76652	-4.0145	0.00192383	0.0229899	-1.52618	CG4036
FBgn0037877	-0.153982	8.82439	-4.01495	0.00192234	0.0229899	-1.52539	CG6689
FBgn0040733	-0.427076	9.96764	-4.01365	0.00192669	0.023	-1.52768	CG15068
FBgn0034438	0.191649	7.86291	4.01247	0.00193065	0.0230255	-1.52976	CG9416
FBgn0016694	-0.211756	8.25125	-4.00934	0.00194115	0.0231071	-1.53525	Pdp1
FBgn0031800	0.348235	7.60734	4.00946	0.00194075	0.0231071	-1.53504	CG9497
FBgn0037882	-0.122103	8.35339	-4.00652	0.00195071	0.0231989	-1.54022	CG17187
FBgn0024909	-0.138031	8.44219	-4.00496	0.001956	0.0232399	-1.54297	Taf7
FBgn0032401	-0.175173	7.62246	-4.00338	0.00196138	0.02326	-1.54575	CG6792
FBgn0038420	0.289607	9.52715	4.0036	0.00196063	0.02326	-1.54536	CG10311
FBgn0040717	0.202238	7.3926	4.00275	0.00196355	0.0232639	-1.54687	Nplp4
FBgn0035158	-0.158856	7.72753	-4.00088	0.00196993	0.0232974	-1.55015	CG13895
FBgn0039828	-0.205645	9.93227	-4.00066	0.00197068	0.0232974	-1.55054	CG1542
FBgn0259704	-0.160721	9.70338	-4.0003	0.00197192	0.0232974	-1.55117	CG42358
FBgn0260938	-0.145912	9.64134	-3.99315	0.00199659	0.0235449	-1.56376	tay
FBgn0050197	0.283988	10.2406	3.99347	0.00199548	0.0235449	-1.56319	CG30197
FBgn0004456	-0.126629	7.54215	-3.98832	0.00201346	0.0236994	-1.57227	mew
FBgn0038673	-0.162867	9.73292	-3.98868	0.00201217	0.0236994	-1.57162	CG14286
FBgn0024555	-0.209176	9.94099	-3.98778	0.00201535	0.0236996	-1.57322	flfl
FBgn0037085	-0.174679	6.0921	-3.98538	0.00202375	0.0237763	-1.57743	Neu2
FBgn0030096	-0.153554	9.43081	-3.98456	0.00202665	0.0237881	-1.57888	Zpr1
FBgn0003862	-0.148073	9.46974	-3.98156	0.00203728	0.0238196	-1.58418	trx
FBgn0019952	0.270585	8.49014	3.98201	0.00203569	0.0238196	-1.58338	Orct
FBgn0035761	-0.146337	8.81275	-3.98286	0.00203267	0.0238196	-1.58188	RhoGEF4
FBgn0040398	0.370581	11.0002	3.98244	0.00203414	0.0238196	-1.58262	CG14629
FBgn0050105	-0.150575	8.60223	-3.98061	0.00204065	0.0238196	-1.58585	CG30105
FBgn0250785	-0.259287	8.54705	-3.98065	0.00204051	0.0238196	-1.58578	vari
FBgn0035798	0.183652	8.03663	3.97929	0.00204533	0.0238522	-1.58817	CG7526
FBgn0027578	0.31033	8.7474	3.97739	0.00205211	0.023909	-1.59151	CG14526
FBgn0030958	-0.114307	6.37477	-3.97051	0.00207684	0.0240593	-1.60364	CG6900
FBgn0031428	0.147553	8.12379	3.97108	0.00207479	0.0240593	-1.60264	CG9886
FBgn0033733	0.587518	8.20385	3.9701	0.00207835	0.0240593	-1.60437	CG8834
FBgn0035515	0.144744	9.2778	3.9709	0.00207545	0.0240593	-1.60296	CG14997
FBgn0035670	0.632019	11.8778	3.97262	0.00206926	0.0240593	-1.59993	CG10472
FBgn0036266	-0.167219	8.92085	-3.97023	0.00207787	0.0240593	-1.60414	CG5626
FBgn0039056	-0.182029	9.99306	-3.9715	0.00207327	0.0240593	-1.60189	cenB1A
FBgn0000038	-0.141724	7.54761	-3.96352	0.00210231	0.0242255	-1.61597	nAcRbeta-64B
FBgn0000536	0.161318	10.3747	3.9656	0.00209471	0.0242255	-1.6123	eas
FBgn0003732	-0.131636	11.2893	-3.96433	0.00209933	0.0242255	-1.61453	Top2
FBgn0015808	0.193058	10.1483	3.96368	0.00210172	0.0242255	-1.61568	ScpX
FBgn0040342	0.553964	7.55325	3.96375	0.00210146	0.0242255	-1.61556	CG3706
FBgn0035760	-0.229478	8.28672	-3.9606	0.00211303	0.0243269	-1.62111	CG8607
FBgn0261446	0.190016	8.37662	3.95702	0.00212627	0.0244569	-1.62743	CG13377
FBgn0036460	-0.187891	10.2498	-3.95423	0.00213664	0.0245538	-1.63235	CG5114
FBgn0036915	-0.182915	9.39028	-3.95019	0.00215175	0.024705	-1.63948	CG7757
FBgn0028494	-0.176441	9.00449	-3.94508	0.00217103	0.0249037	-1.64851	CG6424
FBgn0030067	-0.243381	9.98905	-3.94455	0.00217304	0.0249041	-1.64944	Rbm13
FBgn0031538	0.287072	9.73297	3.94385	0.00217568	0.0249118	-1.65067	CG3246
FBgn0004956	-0.160184	6.33861	-3.93857	0.00219584	0.0249443	-1.65999	os
FBgn0020887	-0.118856	10.4869	-3.93999	0.0021904	0.0249443	-1.65749	Su(z)12
FBgn0027601	0.126541	10.6722	3.93849	0.00219613	0.0249443	-1.66013	CG9009
FBgn0030590	0.14986	6.1299	3.94052	0.00218837	0.0249443	-1.65655	CG9518
FBgn0031940	0.241697	7.15024	3.94046	0.00218858	0.0249443	-1.65665	CG7214
FBgn0037146	0.30334	10.0861	3.94238	0.00218127	0.0249443	-1.65326	CG7470
FBgn0038274	-0.140696	8.36305	-3.93911	0.00219378	0.0249443	-1.65905	CG7262
FBgn0050380	0.148029	6.6295	3.94148	0.00218471	0.0249443	-1.65485	CG30380
FBgn0052054	0.197466	7.0595	3.93844	0.00219632	0.0249443	-1.66022	CG32054
FBgn0000037	-0.114918	6.91174	-3.93729	0.00220073	0.024972	-1.66225	mAcR-60C
FBgn0016762	-0.153919	8.60413	-3.93611	0.00220529	0.0249895	-1.66434	angel
FBgn0031488	-0.195524	7.54198	-3.93586	0.00220624	0.0249895	-1.66477	CG17265
FBgn0028978	-0.189969	8.53616	-3.93271	0.00221842	0.0251049	-1.67034	trbl
FBgn0040250	0.164371	6.69078	3.92934	0.00223153	0.0252307	-1.6763	Ugt86Dj
FBgn0040502	-0.419578	9.52957	-3.92669	0.00224185	0.0253247	-1.68096	CG8343
FBgn0010292	-0.131122	10.2891	-3.92252	0.00225828	0.0254874	-1.68835	bys
FBgn0039435	0.263825	6.77621	3.9201	0.00226783	0.0255723	-1.69261	TwdlP
FBgn0033541	-0.289783	7.94776	-3.91854	0.00227404	0.0256195	-1.69538	CG12934
FBgn0026313	-0.143068	10.2814	-3.91539	0.0022866	0.025738	-1.70094	X11L
FBgn0260944	-0.10398	7.38311	-3.91316	0.0022955	0.0258084	-1.70487	Rbp1
FBgn0065035	-0.166898	9.11121	-3.9128	0.00229694	0.0258084	-1.70551	AlkB
FBgn0039930	-0.135698	9.22543	-3.91013	0.00230772	0.0258833	-1.71024	CG11077
FBgn0051207	0.212596	7.79549	3.91042	0.00230653	0.0258833	-1.70972	CG31207
FBgn0036035	-0.157887	10.0878	-3.90916	0.00231161	0.025904	-1.71194	CG18178
FBgn0038809	-0.109564	11.0071	-3.90487	0.00232905	0.0260762	-1.71954	CG16953
FBgn0020303	-0.124531	12.198	-3.90434	0.0023312	0.0260772	-1.72047	fok
FBgn0031490	-0.199054	7.05426	-3.90179	0.00234164	0.0261707	-1.72499	CG17264
FBgn0001256	0.379463	6.95489	3.89733	0.00235996	0.0263384	-1.73286	ImpL1
FBgn0029878	-0.164562	10.3166	-3.8969	0.00236175	0.0263384	-1.73363	Pat1
FBgn0030331	-0.1664	7.66933	-3.89662	0.0023629	0.0263384	-1.73412	CG15221
FBgn0001089	0.391297	7.90925	3.89494	0.00236987	0.0263916	-1.7371	Gal
FBgn0029885	-0.238596	9.86655	-3.89436	0.00237227	0.0263916	-1.73812	CG3224
FBgn0031053	-0.21867	6.94139	-3.89396	0.00237395	0.0263916	-1.73884	CG14223
FBgn0261534	0.377939	8.58322	3.88646	0.00240532	0.0267168	-1.7521	l(2)34Fc
FBgn0010926	-0.230285	9.77479	-3.88478	0.00241239	0.0267718	-1.75507	l(3)07882
FBgn0038180	0.253859	6.75616	3.88273	0.00242108	0.0268446	-1.7587	Cht5
FBgn0004649	-0.192082	11.4939	-3.88214	0.00242356	0.0268485	-1.75974	yl
FBgn0000358	-0.363645	12.9618	-3.88052	0.00243046	0.0269014	-1.76261	Cp19
FBgn0039182	-0.304357	10.8544	-3.87944	0.00243506	0.0269051	-1.76452	CG5728
FBgn0039474	0.752689	7.94903	3.87972	0.00243389	0.0269051	-1.76403	CG6283
FBgn0250815	0.382585	12.931	3.87867	0.00243836	0.026918	-1.76589	Jon65Aiv
FBgn0013763	0.186554	11.8772	3.87595	0.00245	0.0269757	-1.7707	CG5210
FBgn0030926	0.232158	7.90387	3.87645	0.00244788	0.0269757	-1.76983	psh
FBgn0053214	-0.15379	8.24199	-3.87683	0.00244624	0.0269757	-1.76915	CG33214
FBgn0002036	-0.157423	8.75973	-3.87344	0.00246082	0.0270194	-1.77515	CG10561
FBgn0026077	0.998993	8.64616	3.87317	0.00246195	0.0270194	-1.77562	Gasp
FBgn0031597	-0.185272	9.07113	-3.87304	0.00246254	0.0270194	-1.77585	CG17612
FBgn0037092	-0.141499	7.9442	-3.87444	0.00245649	0.0270194	-1.77337	M6
FBgn0000063	-0.139008	7.99628	-3.87229	0.0024658	0.0270316	-1.77719	ald
FBgn0002526	-0.144782	9.54152	-3.87012	0.00247516	0.0270746	-1.78102	LanA
FBgn0032256	-0.128015	8.9159	-3.86989	0.00247615	0.0270746	-1.78142	RluA-2
FBgn0042104	0.390764	7.04562	3.87074	0.00247249	0.0270746	-1.77993	CG18747
FBgn0038237	-0.169314	7.97305	-3.86813	0.00248383	0.027135	-1.78455	Pde6
FBgn0051300	0.192866	7.13729	3.85846	0.00252631	0.0275537	-1.80168	CG31300
FBgn0259237	0.155278	6.36627	3.85841	0.00252652	0.0275537	-1.80176	CG42335
FBgn0033716	-0.111561	9.69485	-3.85427	0.00254494	0.0277306	-1.8091	Den1
FBgn0021874	-0.242603	9.19639	-3.85227	0.00255388	0.0277801	-1.81264	Nle
FBgn0037566	-0.107101	10.451	-3.85234	0.00255358	0.0277801	-1.81252	mRpL1
FBgn0038681	0.372155	9.02346	3.85003	0.00256397	0.0278658	-1.81662	Cyp12a4
FBgn0034579	-0.135988	9.4197	-3.84883	0.00256935	0.0279003	-1.81874	mRpL54
FBgn0027567	-0.126765	10.9314	-3.84808	0.00257274	0.027913	-1.82007	CG8108
FBgn0035569	-0.258073	6.30771	-3.84463	0.00258839	0.0280586	-1.82619	CG15876
FBgn0038179	0.217118	8.35337	3.84355	0.0025933	0.0280877	-1.82811	CG9312
FBgn0031376	0.124263	10.3866	3.84175	0.00260149	0.0281523	-1.83129	Der-1
FBgn0030594	0.430202	10.5163	3.83998	0.00260962	0.0281919	-1.83444	CG9509
FBgn0031484	-0.243093	9.75752	-3.83932	0.00261262	0.0281919	-1.8356	CG3165
FBgn0033988	-0.209251	10.4219	-3.839	0.00261408	0.0281919	-1.83617	pcs
FBgn0085243	-0.591941	6.82287	-3.84027	0.00260825	0.0281919	-1.83391	CG34214
FBgn0000075	-0.310349	8.28474	-3.83665	0.0026249	0.0282602	-1.84033	amd
FBgn0260386	0.130525	6.89626	3.83713	0.00262268	0.0282602	-1.83948	mtg
FBgn0003302	-0.229054	9.21806	-3.83366	0.00263873	0.0283607	-1.84564	rux
FBgn0029608	0.390071	8.80877	3.83375	0.00263833	0.0283607	-1.84549	CG3091
FBgn0028691	0.0995941	11.3389	3.83181	0.00264732	0.0284288	-1.84892	Rpn9
FBgn0014388	-0.162865	8.17195	-3.83051	0.00265337	0.0284454	-1.85123	sty
FBgn0032329	-0.177276	9.08305	-3.83073	0.00265237	0.0284454	-1.85085	Art8
FBgn0004003	0.260197	8.84204	3.8293	0.00265901	0.0284809	-1.85337	wbl
FBgn0038414	0.183115	7.00243	3.82884	0.00266119	0.0284809	-1.8542	CG6901
FBgn0051778	0.328471	8.13891	3.82775	0.00266628	0.0285111	-1.85612	CG31778
FBgn0038405	0.197783	6.6424	3.82631	0.00267305	0.0285593	-1.85868	CG8927
FBgn0017578	-0.14916	9.89464	-3.82286	0.00268929	0.0287085	-1.8648	Max
FBgn0010339	-0.104142	11.3015	-3.82193	0.00269371	0.0287177	-1.86646	128up
FBgn0041789	-0.245551	9.48226	-3.82172	0.0026947	0.0287177	-1.86683	Pax
FBgn0034394	0.311454	11.0327	3.82044	0.00270078	0.0287582	-1.8691	CG15096
FBgn0034959	-0.193961	9.00708	-3.81925	0.00270639	0.0287937	-1.8712	CG11388
FBgn0029966	-0.305152	7.96231	-3.81789	0.00271292	0.0288365	-1.87363	Ir7c
FBgn0033562	-0.284574	10.3441	-3.81745	0.00271499	0.0288365	-1.8744	CG6751
FBgn0032788	-0.537968	11.2921	-3.8156	0.00272383	0.0288818	-1.87768	CG13084
FBgn0052344	-0.169377	10.2983	-3.8157	0.00272337	0.0288818	-1.87751	CG32344
FBgn0028542	0.299139	7.23563	3.81375	0.00273273	0.0289518	-1.88097	nimB4
FBgn0040723	0.284822	8.65008	3.81147	0.00274372	0.0290439	-1.88502	CG5011
FBgn0039218	-0.142388	9.31519	-3.81025	0.00274958	0.0290815	-1.88717	Rpb10
FBgn0034087	-0.243168	10.3603	-3.80936	0.00275391	0.0290885	-1.88876	CG8443
FBgn0034432	0.138742	11.8948	3.80916	0.00275486	0.0290885	-1.88911	CG7461
FBgn0035131	0.184022	7.14583	3.80809	0.00276008	0.0291193	-1.89102	mthl9
FBgn0039207	-0.194584	9.90847	-3.80271	0.00278631	0.029347	-1.90056	CG5789
FBgn0261855	-0.18099	6.84157	-3.80272	0.00278626	0.029347	-1.90054	CG42784
FBgn0034360	-0.193704	8.63997	-3.79899	0.00280462	0.0295152	-1.90717	CG10927
FBgn0004901	-0.147406	10.5689	-3.79796	0.00280972	0.0295332	-1.909	Prat
FBgn0010422	-0.124198	9.69491	-3.79723	0.00281335	0.0295332	-1.91031	TfIIS
FBgn0032474	0.144579	9.39104	3.79725	0.00281323	0.0295332	-1.91026	DnaJ-H
FBgn0011638	-0.102432	11.6076	-3.79385	0.00283014	0.0296398	-1.91631	La
FBgn0027932	-0.156166	11.3292	-3.79364	0.00283116	0.0296398	-1.91667	Akap200
FBgn0039487	-0.145352	10.5565	-3.79401	0.00282932	0.0296398	-1.91602	gb
FBgn0050418	-0.18726	7.23986	-3.79329	0.00283291	0.0296398	-1.9173	nord
FBgn0003719	-0.203194	6.43734	-3.79184	0.00284016	0.0296911	-1.91987	tld
FBgn0032020	-0.17333	9.3182	-3.78936	0.00285258	0.0297963	-1.92428	CG7787
FBgn0038191	-0.160492	10.7654	-3.78691	0.00286491	0.0299003	-1.92863	CG9925
FBgn0032681	-0.220055	8.26066	-3.78546	0.00287227	0.0299098	-1.93121	CG10283
FBgn0036349	-0.648876	6.89771	-3.78533	0.00287293	0.0299098	-1.93145	SNCF
FBgn0042179	0.125404	6.72446	3.78601	0.00286946	0.0299098	-1.93023	CG18869
FBgn0030828	0.35807	8.06343	3.78225	0.00288854	0.0300474	-1.93691	CG5162
FBgn0024980	0.17904	7.90593	3.77029	0.00295007	0.0306592	-1.95817	Syx4
FBgn0029879	-0.148452	8.90627	-3.76988	0.00295221	0.0306592	-1.9589	Apc7
FBgn0029714	-0.123939	9.91555	-3.7685	0.00295943	0.030709	-1.96136	CG3527
FBgn0038582	-0.1911	7.8958	-3.76751	0.00296457	0.030737	-1.96311	CG7988
FBgn0013759	-0.224552	9.12531	-3.76428	0.00298151	0.0308366	-1.96885	CASK
FBgn0030316	-0.177762	8.40502	-3.76492	0.00297817	0.0308366	-1.96773	CG11695
FBgn0035570	-0.141541	6.19573	-3.7646	0.00297986	0.0308366	-1.9683	CG13712
FBgn0003068	-0.220088	7.57889	-3.76291	0.00298874	0.030886	-1.9713	per
FBgn0032002	0.336686	8.5041	3.76204	0.00299332	0.0309081	-1.97284	CG8353
FBgn0032926	-0.138248	9.42842	-3.76057	0.00300107	0.0309628	-1.97545	CG9243
FBgn0013755	-0.192681	6.34622	-3.75945	0.00300701	0.0309735	-1.97744	Bro
FBgn0035152	-0.239558	8.76315	-3.75989	0.0030047	0.0309735	-1.97667	CG3386
FBgn0030992	0.144275	6.40139	3.75779	0.00301584	0.0310391	-1.9804	CG33253
FBgn0034797	0.179539	9.08181	3.75536	0.00302879	0.031147	-1.98472	nahoda
FBgn0259112	-0.1614	7.39315	-3.75426	0.0030347	0.0311823	-1.98668	CG42254
FBgn0039045	0.241972	7.18966	3.75348	0.00303889	0.0312	-1.98807	CG17119
FBgn0030756	0.201277	6.73886	3.75252	0.00304402	0.0312272	-1.98977	CG9903
FBgn0030985	0.271521	9.21901	3.74968	0.00305934	0.0313589	-1.99483	Obp18a
FBgn0036551	0.241548	9.14253	3.74913	0.0030623	0.0313637	-1.99581	CG17029
FBgn0036889	-0.154175	8.9371	-3.74845	0.00306595	0.0313757	-1.99701	CG14100
FBgn0030326	0.160528	6.35115	3.74667	0.00307561	0.031449	-2.00018	CG2444
FBgn0028956	0.168868	7.36401	3.74291	0.00309614	0.0316332	-2.00688	mthl3
FBgn0036940	0.132539	6.20139	3.74175	0.00310245	0.0316721	-2.00894	obst-J
FBgn0051974	0.324924	9.41578	3.74	0.00311209	0.0317449	-2.01206	CG31974
FBgn0050265	0.178109	5.98169	3.73788	0.00312376	0.0318381	-2.01583	CG30265
FBgn0040350	0.252896	7.67096	3.73712	0.00312793	0.0318549	-2.01718	CG3690
FBgn0032322	0.283384	9.3952	3.73406	0.00314488	0.0319904	-2.02262	CG16743
FBgn0039343	-0.172747	6.10417	-3.73381	0.0031463	0.0319904	-2.02308	CG5111
FBgn0034117	0.143547	10.2229	3.73262	0.00315289	0.0320315	-2.02518	CG7997
FBgn0038037	0.341402	9.92719	3.73145	0.00315941	0.0320552	-2.02727	Cyp9f2
FBgn0050495	0.175724	7.07321	3.73129	0.0031603	0.0320552	-2.02755	CG30495
FBgn0010263	-0.150742	6.8411	-3.72898	0.00317323	0.0321605	-2.03167	Rbp9
FBgn0033590	0.407399	7.20083	3.72572	0.00319158	0.0323205	-2.03748	CG13217
FBgn0032016	0.0938041	9.75866	3.72363	0.00320338	0.032388	-2.04119	CG7818
FBgn0038465	0.206632	9.88353	3.72392	0.00320175	0.032388	-2.04068	Irc
FBgn0031936	0.32072	7.67206	3.72123	0.00321701	0.0324998	-2.04547	CG13794
FBgn0085194	-0.14643	6.77054	-3.7207	0.00322001	0.032504	-2.04641	CG34165
FBgn0259784	-0.200185	9.22758	-3.71738	0.00323899	0.0326695	-2.05233	Det
FBgn0011828	0.202524	6.90731	3.71625	0.00324548	0.0326883	-2.05435	Pxn
FBgn0031764	-0.150167	7.99243	-3.71615	0.00324603	0.0326883	-2.05452	CG9107
FBgn0035280	0.271002	7.52913	3.71511	0.00325202	0.0327225	-2.05637	Cpr62Bb
FBgn0031559	0.165916	6.90641	3.71234	0.003268	0.0328048	-2.06131	CG3513
FBgn0034800	-0.246631	8.30259	-3.7125	0.00326706	0.0328048	-2.06102	CG3788
FBgn0043578	0.742965	8.002	3.71264	0.00326627	0.0328048	-2.06078	PGRP-SB1
FBgn0034509	0.277757	9.53498	3.7105	0.00327867	0.0328802	-2.06459	Obp57c
FBgn0040299	0.202726	6.75087	3.71014	0.00328072	0.0328802	-2.06522	Myo28B1
FBgn0039993	-0.105518	11.3228	-3.70966	0.00328351	0.032882	-2.06608	CG17691
FBgn0023527	-0.156778	10.7642	-3.70659	0.00330142	0.0330077	-2.07156	CG3071
FBgn0031020	-0.181866	10.9011	-3.70571	0.00330652	0.0330077	-2.07311	Nat1
FBgn0035838	-0.16451	8.96635	-3.70572	0.00330652	0.0330077	-2.07311	ldbr
FBgn0036622	0.17101	10.5766	3.7059	0.00330545	0.0330077	-2.07278	CG4753
FBgn0039357	-0.112469	8.42779	-3.70482	0.00331174	0.0330337	-2.0747	CG4743
FBgn0036783	0.385703	8.58389	3.70277	0.00332381	0.0331278	-2.07836	CheA75a
FBgn0028562	0.131239	6.77642	3.70152	0.00333119	0.0331526	-2.0806	sut2
FBgn0034142	0.204519	8.73839	3.70145	0.00333155	0.0331526	-2.0807	CG8306
FBgn0002732	-0.130503	6.54873	-3.70019	0.00333903	0.0331747	-2.08296	malpha
FBgn0032213	0.273759	9.55893	3.70059	0.00333665	0.0331747	-2.08225	CG5390
FBgn0034499	0.284275	6.58799	3.69955	0.0033428	0.033186	-2.0841	Cpr56F
FBgn0038652	0.380357	9.0844	3.69801	0.0033519	0.0332503	-2.08684	CG7720
FBgn0037973	0.348141	8.43364	3.69704	0.0033577	0.0332816	-2.08858	CG18547
FBgn0034335	-0.149394	10.9258	-3.69592	0.00336432	0.033297	-2.09056	GstE1
FBgn0035513	0.777021	8.40066	3.69589	0.00336453	0.033297	-2.09062	Cpr64Ad
FBgn0037250	-0.146395	10.2989	-3.69305	0.00338147	0.0334384	-2.09568	CG1074
FBgn0261673	0.238473	9.32037	3.68859	0.00340829	0.0336772	-2.10363	nemy
FBgn0038363	-0.140764	9.70813	-3.681	0.00345444	0.0341065	-2.11717	Acyp2
FBgn0033261	-0.208579	9.51316	-3.67675	0.00348053	0.0343373	-2.12475	CG18316
FBgn0035445	-0.16209	6.63049	-3.67625	0.0034836	0.0343407	-2.12563	CG12014
FBgn0039835	-0.127802	9.46382	-3.67424	0.00349605	0.0344365	-2.12922	mRpL32
FBgn0034740	-0.113859	6.16112	-3.6724	0.00350746	0.034522	-2.1325	CG3875
FBgn0042206	0.160059	6.95448	3.67186	0.00351081	0.034528	-2.13346	GstD10
FBgn0038683	-0.174368	10.0648	-3.67108	0.00351568	0.0345489	-2.13486	CG11779
FBgn0003016	-0.304492	9.45102	-3.66712	0.00354048	0.034647	-2.14193	osp
FBgn0032299	0.352236	7.55194	3.66708	0.00354071	0.034647	-2.142	CG17127
FBgn0034711	0.521539	9.16694	3.66642	0.00354488	0.034647	-2.14318	CG3290
FBgn0036752	0.265584	8.79357	3.66896	0.00352895	0.034647	-2.13865	Adgf-A
FBgn0038011	-0.5342	8.07746	-3.66659	0.0035438	0.034647	-2.14287	CG4066
FBgn0038211	0.351724	8.0459	3.66747	0.00353826	0.034647	-2.1413	CG9649
FBgn0044047	-0.210892	7.44354	-3.66647	0.00354453	0.034647	-2.14308	Ilp6
FBgn0010114	-0.157362	7.78627	-3.66244	0.00356996	0.0348651	-2.15027	hig
FBgn0259736	-0.271943	9.46807	-3.66117	0.00357802	0.0349169	-2.15255	CG42390
FBgn0034141	0.161719	9.8357	3.65906	0.00359144	0.0350207	-2.15631	CG8311
FBgn0010497	0.194097	11.6217	3.65694	0.00360498	0.0350756	-2.1601	l(2)01810
FBgn0029924	0.155553	9.93628	3.65724	0.00360304	0.0350756	-2.15955	CG4586
FBgn0037372	-0.0978656	9.81209	-3.65687	0.00360541	0.0350756	-2.16022	CG2091
FBgn0034718	0.201202	10.417	3.65589	0.00361165	0.0351093	-2.16196	wdp
FBgn0031143	0.0982864	10.3692	3.65462	0.00361986	0.0351619	-2.16424	CG1532
FBgn0020513	0.162159	11.6594	3.65352	0.00362689	0.0351761	-2.16619	ade5
FBgn0025865	-0.400544	8.99151	-3.65354	0.0036268	0.0351761	-2.16617	Cortactin
FBgn0015737	0.168641	10.8508	3.65277	0.00363172	0.0351959	-2.16753	Hmu
FBgn0041252	-0.513517	11.3002	-3.65232	0.00363466	0.0351973	-2.16834	Femcoat
FBgn0261397	-0.129841	10.1397	-3.65167	0.00363885	0.0352109	-2.1695	didum
FBgn0023512	-0.126332	9.98331	-3.64988	0.0036504	0.0352956	-2.17269	eIF2B-epsilon
FBgn0023197	0.450916	11.1099	3.64697	0.00366929	0.035424	-2.17788	Jon74E
FBgn0025352	0.149766	11.2371	3.64729	0.00366724	0.035424	-2.17732	Thiolase
FBgn0033814	0.129468	10.6794	3.64577	0.00367711	0.0354723	-2.18002	CG4670
FBgn0040066	-0.158008	9.53386	-3.64334	0.00369303	0.0355986	-2.18437	wds
FBgn0037125	0.130709	6.65311	3.64117	0.00370726	0.0356912	-2.18824	CG14573
FBgn0261530	-0.169575	9.67659	-3.64102	0.00370829	0.0356912	-2.18852	nbs
FBgn0028499	-0.183043	7.46852	-3.63949	0.00371837	0.0357337	-2.19125	CG7985
FBgn0031317	-0.150246	8.47611	-3.63968	0.00371711	0.0357337	-2.19091	CG5118
FBgn0050187	-0.169283	6.70072	-3.63829	0.00372625	0.0357822	-2.19338	CG30187
FBgn0028544	0.497533	6.90402	3.63757	0.00373102	0.0357856	-2.19466	CG16884
FBgn0243511	-0.138553	10.1314	-3.63738	0.00373227	0.0357856	-2.195	psidin
FBgn0015295	-0.134491	10.2782	-3.63288	0.00376222	0.0359634	-2.20304	shark
FBgn0030799	0.20526	7.24925	3.63395	0.00375508	0.0359634	-2.20112	CG4872
FBgn0032035	0.141779	10.9687	3.63307	0.003761	0.0359634	-2.20271	CG13393
FBgn0039441	1.07354	8.27021	3.63294	0.00376182	0.0359634	-2.20293	TwdlN
FBgn0259748	0.427813	11.247	3.63243	0.00376528	0.0359654	-2.20385	CG42397
FBgn0038118	-0.187308	8.70079	-3.63192	0.00376867	0.0359705	-2.20476	timeout
FBgn0029696	-0.604698	10.035	-3.62753	0.00379814	0.0362245	-2.21259	CG15571
FBgn0015034	0.196153	7.15261	3.62672	0.00380362	0.0362493	-2.21404	Cyp4e1
FBgn0027334	-0.193757	9.95918	-3.62197	0.00383591	0.0365019	-2.22254	l(1)G0004
FBgn0050277	0.195733	7.67707	3.62238	0.00383308	0.0365019	-2.22179	Oatp58Da
FBgn0033225	-0.18435	9.22458	-3.62072	0.00384443	0.0365554	-2.22477	CG1550
FBgn0039215	-0.190016	8.90095	-3.61783	0.00386419	0.036688	-2.22992	CG6695
FBgn0040653	0.416144	8.37593	3.61803	0.00386281	0.036688	-2.22956	IM4
FBgn0010408	-0.0995021	12.5015	-3.61199	0.0039045	0.0370428	-2.24035	RpS9
FBgn0032228	-0.246198	8.29209	-3.61131	0.00390926	0.0370601	-2.24158	CG5367
FBgn0030352	-0.11818	9.46958	-3.61013	0.00391745	0.0370821	-2.24368	CG15738
FBgn0038330	-0.1813	7.20388	-3.61036	0.00391587	0.0370821	-2.24328	CG14868
FBgn0086906	0.260242	9.24562	3.60917	0.00392417	0.0371179	-2.2454	sls
FBgn0031737	0.231293	7.94211	3.60794	0.00393275	0.0371711	-2.2476	obst-E
FBgn0035164	-0.19199	8.8245	-3.60557	0.00394939	0.0373004	-2.25184	CG13901
FBgn0262573	-0.150245	8.1384	-3.60511	0.00395256	0.0373025	-2.25265	orb2
FBgn0029838	0.32401	9.29381	3.59867	0.00399813	0.0375731	-2.26416	CG4666
FBgn0032789	-0.502779	12.0915	-3.59858	0.00399873	0.0375731	-2.26432	CG13083
FBgn0033734	-0.12789	10.17	-3.59853	0.0039991	0.0375731	-2.26441	CG8520
FBgn0038472	-0.115861	8.6483	-3.5995	0.00399225	0.0375731	-2.26269	CG3995
FBgn0039183	-0.14915	7.09911	-3.59957	0.00399174	0.0375731	-2.26256	Dis3
FBgn0042696	-0.165752	6.73431	-3.59986	0.00398965	0.0375731	-2.26203	NfI
FBgn0022985	-0.268387	10.4356	-3.59395	0.00403182	0.037796	-2.27259	qkr58E-2
FBgn0032523	-0.30863	8.21184	-3.59428	0.00402947	0.037796	-2.27201	CG16956
FBgn0038545	-0.176921	9.21684	-3.59445	0.00402824	0.037796	-2.2717	CG7713
FBgn0039611	0.275898	6.89603	3.59304	0.00403841	0.0378297	-2.27424	CG14528
FBgn0031717	0.234513	7.88626	3.58979	0.00406181	0.0379996	-2.28004	Oscillin
FBgn0032452	-0.156068	6.929	-3.58968	0.00406257	0.0379996	-2.28023	CG15484
FBgn0050334	-0.28332	7.32158	-3.58739	0.00407922	0.0381271	-2.28434	CG30334
FBgn0035888	-0.174736	7.7026	-3.58574	0.00409118	0.0382106	-2.28728	CG7120
FBgn0260486	-0.250782	9.18808	-3.58359	0.00410688	0.0383005	-2.29112	CG42533
FBgn0034490	0.167966	10.0877	3.58388	0.00410478	0.0383005	-2.29061	CG9864
FBgn0063493	0.14749	9.54301	3.5823	0.00411633	0.0383603	-2.29343	GstE7
FBgn0037773	-0.170804	8.37663	-3.57867	0.00414303	0.0385755	-2.29993	CG5359
FBgn0259937	-0.110148	12.3335	-3.57833	0.00414553	0.0385755	-2.30053	Nop60B
FBgn0031033	0.157931	6.27971	3.57375	0.00417945	0.0388052	-2.30871	CG14219
FBgn0037565	-0.155959	8.13417	-3.57379	0.00417919	0.0388052	-2.30865	CG9626
FBgn0039434	1.04093	9.04817	3.57444	0.00417437	0.0388052	-2.30749	TwdlM
FBgn0028396	0.520435	8.70858	3.57295	0.00418541	0.038832	-2.31015	TotA
FBgn0043792	0.175228	6.73889	3.56957	0.00421073	0.0390382	-2.3162	CG30427
FBgn0010280	-0.111706	9.33879	-3.56604	0.00423729	0.0392268	-2.32251	Taf4
FBgn0038427	-0.101176	8.70438	-3.56612	0.00423668	0.0392268	-2.32237	ema
FBgn0032167	0.217175	8.11595	3.56443	0.00424947	0.0392532	-2.3254	CG5853
FBgn0033855	-0.428727	6.91738	-3.56449	0.00424895	0.0392532	-2.32527	CG13333
FBgn0039052	0.344147	8.65248	3.56508	0.00424451	0.0392532	-2.32422	CG6733
FBgn0033274	-0.327463	8.88346	-3.56376	0.00425454	0.0392558	-2.32659	CG14757
FBgn0036600	0.371223	7.05747	3.56357	0.00425598	0.0392558	-2.32693	CG13043
FBgn0038930	0.232891	10.5549	3.56271	0.00426245	0.0392708	-2.32846	CG5778
FBgn0039323	0.247024	7.00284	3.56253	0.00426383	0.0392708	-2.32878	CG10559
FBgn0024366	0.184237	6.89855	3.56159	0.00427097	0.0392792	-2.33046	CG11409
FBgn0039336	-0.117369	8.54645	-3.56163	0.00427072	0.0392792	-2.3304	CG4553
FBgn0015600	-0.160268	9.85349	-3.55898	0.0042909	0.039405	-2.33514	toc
FBgn0026411	-0.20989	9.3658	-3.55912	0.00428987	0.039405	-2.3349	Lim1
FBgn0260444	-0.20989	9.3658	-3.55912	0.00428987	0.039405	-2.3349	CG18616
FBgn0040344	0.197243	9.01253	3.55341	0.00433374	0.0397695	-2.34511	CG3711
FBgn0011836	-0.14131	9.17839	-3.55203	0.00434439	0.0397973	-2.34757	Taf2
FBgn0025629	-0.119532	9.85992	-3.55235	0.00434193	0.0397973	-2.347	CG4045
FBgn0243586	0.343627	6.86607	3.55179	0.00434623	0.0397973	-2.348	Tb
FBgn0004583	-0.147333	7.58778	-3.55134	0.00434978	0.039801	-2.34882	ex
FBgn0051676	0.275915	8.48831	3.54861	0.00437099	0.039966	-2.3537	CG31676
FBgn0032988	-0.12214	11.4152	-3.53943	0.00444316	0.0405965	-2.37013	Tif-IA
FBgn0036952	0.404514	6.64158	3.53729	0.00446009	0.0407217	-2.37395	CG6933
FBgn0032298	-0.189125	9.5758	-3.53475	0.00448038	0.0407889	-2.3785	CG6724
FBgn0036715	-0.361659	9.48175	-3.5356	0.00447356	0.0407889	-2.37697	Cad74A
FBgn0036978	0.137976	6.28302	3.53497	0.0044786	0.0407889	-2.3781	Toll-9
FBgn0085360	0.383235	8.60499	3.53538	0.00447534	0.0407889	-2.37737	CG34331
FBgn0043854	-0.205115	9.64586	-3.53426	0.0044843	0.0407952	-2.37938	slam
FBgn0002781	-0.12988	8.32591	-3.53322	0.00449262	0.0408414	-2.38124	mod(mdg4)
FBgn0022702	-0.215995	9.51175	-3.53053	0.00451421	0.0410081	-2.38605	Cht2
FBgn0027552	0.133537	12.1504	3.52588	0.0045519	0.0412911	-2.39439	CG10863
FBgn0051097	-0.140603	6.8343	-3.52622	0.00454907	0.0412911	-2.39376	CG31097
FBgn0036780	0.324435	7.09471	3.52362	0.00457029	0.0414281	-2.39843	CG7330
FBgn0261560	-0.264556	11.7584	-3.52286	0.00457651	0.0414547	-2.3998	Thor
FBgn0036255	-0.123415	9.73019	-3.52026	0.00459774	0.0416171	-2.40444	Atg12
FBgn0037883	-0.192786	8.55861	-3.51858	0.00461159	0.0417126	-2.40745	CG14701
FBgn0027599	-0.126714	9.45548	-3.51687	0.00462565	0.0417964	-2.41051	CG2790
FBgn0029836	0.187135	6.55708	3.51585	0.00463411	0.0417964	-2.41234	CG5928
FBgn0032888	0.243958	7.51225	3.51593	0.00463347	0.0417964	-2.4122	CheB38c
FBgn0038391	0.317889	7.11299	3.51665	0.00462749	0.0417964	-2.41091	GATAe
FBgn0032399	-0.181207	6.90202	-3.51479	0.00464286	0.0418454	-2.41423	CG6785
FBgn0034140	-0.331147	9.66626	-3.51168	0.00466878	0.042049	-2.41981	CG8317
FBgn0261703	-0.164977	6.73737	-3.50592	0.00471704	0.0424231	-2.43012	gce
FBgn0037283	-0.118947	6.64947	-3.50597	0.00471658	0.0424231	-2.43003	CG14658
FBgn0032752	-0.195819	8.55414	-3.50501	0.00472471	0.0424618	-2.43175	CG10702
FBgn0052743	-0.139806	8.45826	-3.50126	0.00475648	0.0427169	-2.43847	Smg1
FBgn0046776	0.190908	9.66348	3.4997	0.00476975	0.0428056	-2.44126	CR14033
FBgn0030893	0.251558	7.48312	3.49903	0.00477548	0.0428266	-2.44247	RhoGAP16F
FBgn0031561	0.185225	12.7579	3.49709	0.004792	0.0429442	-2.44593	CG16712
FBgn0031908	0.263199	9.75015	3.49531	0.00480727	0.0430505	-2.44912	CG5177
FBgn0015509	-0.118596	11.8746	-3.49261	0.00483055	0.0432283	-2.45396	lin19
FBgn0000568	-0.15978	7.73219	-3.49212	0.00483477	0.0432354	-2.45483	Eip75B
FBgn0261278	0.309017	7.92789	3.49132	0.00484168	0.0432665	-2.45626	grp
FBgn0036147	-0.150751	9.987	-3.48994	0.00485367	0.0433429	-2.45874	CG6199
FBgn0028694	0.108344	11.8855	3.48892	0.00486249	0.0433508	-2.46056	Rpn11
FBgn0031752	-0.138251	9.58907	-3.48865	0.00486486	0.0433508	-2.46105	CG9044
FBgn0037410	0.202556	6.76207	3.48888	0.00486289	0.0433508	-2.46065	Osi2
FBgn0031157	-0.15321	7.52382	-3.48807	0.00486992	0.0433653	-2.46209	CG1503
FBgn0033753	0.150052	6.59012	3.48478	0.00489864	0.043546	-2.46799	Cyp301a1
FBgn0037926	-0.243209	8.83774	-3.48458	0.00490041	0.043546	-2.46835	Elp1
FBgn0038108	-0.143747	9.17383	-3.48456	0.00490057	0.043546	-2.46838	CG7518
FBgn0039644	-0.106923	11.7375	-3.48224	0.00492096	0.0436965	-2.47254	CG11897
FBgn0033101	0.140582	10.4325	3.48161	0.00492647	0.0437146	-2.47366	CG9436
FBgn0021795	0.0959682	12.1031	3.47969	0.00494341	0.0438189	-2.4771	Tapdelta
FBgn0032161	-0.195635	8.52379	-3.4795	0.00494517	0.0438189	-2.47746	CG4594
FBgn0021995	-0.20152	9.86821	-3.4767	0.00496999	0.044008	-2.48247	Rs1
FBgn0033636	-0.138435	9.76007	-3.4743	0.00499135	0.0441661	-2.48677	tou
FBgn0001320	-0.15323	7.02295	-3.47162	0.00501533	0.0443161	-2.49157	kni
FBgn0032889	0.202657	10.474	3.47194	0.00501249	0.0443161	-2.491	CG9331
FBgn0260632	0.11243	8.99165	3.47107	0.00502024	0.0443285	-2.49255	dl
FBgn0003321	-0.118976	10.3126	-3.46948	0.00503454	0.0443766	-2.4954	sbr
FBgn0033717	0.176211	10.1202	3.46929	0.00503625	0.0443766	-2.49574	CG8839
FBgn0037433	0.349643	9.16536	3.4698	0.00503171	0.0443766	-2.49484	CG17919
FBgn0034717	0.231783	7.86494	3.46773	0.00505035	0.0444698	-2.49854	CG5819
FBgn0026361	-0.215262	8.54871	-3.46319	0.00509157	0.0448016	-2.50668	2005-09-01
FBgn0034748	-0.250773	8.84969	-3.46177	0.00510454	0.0448844	-2.50923	CG17807
FBgn0030486	-0.200818	10.4612	-3.45962	0.00512419	0.0450258	-2.51308	Set2
FBgn0035713	-0.150171	9.80491	-3.45889	0.00513088	0.0450532	-2.51438	CG10107
FBgn0039086	0.156907	6.41909	3.45595	0.00515794	0.0452593	-2.51965	CG16732
FBgn0036300	0.101006	9.20434	3.45421	0.00517409	0.0453694	-2.52278	CG10688
FBgn0052468	-0.111439	6.07468	-3.45368	0.00517896	0.0453806	-2.52372	CG32468
FBgn0034128	0.186582	6.86593	3.45316	0.00518383	0.0453918	-2.52466	CG4409
FBgn0039098	-0.433348	8.78933	-3.45262	0.00518877	0.0454036	-2.52562	CG13822
FBgn0040823	0.159146	7.62658	3.4516	0.0051983	0.0454554	-2.52745	dpr6
FBgn0032900	0.201743	8.4648	3.44694	0.00524189	0.0458048	-2.53581	CG14401
FBgn0033543	0.269392	9.24366	3.44269	0.00528194	0.0461229	-2.54343	CG12338
FBgn0032668	0.0947063	6.49097	3.43861	0.00532068	0.046429	-2.55075	CG17681
FBgn0051015	-0.270052	8.42208	-3.43573	0.0053482	0.0466369	-2.55591	PH4alphaPV
FBgn0034722	-0.206082	10.6303	-3.43419	0.00536295	0.0467333	-2.55867	Rtf1
FBgn0034903	-0.127167	7.84654	-3.43205	0.0053835	0.0468476	-2.56249	CG9850
FBgn0051534	-0.119385	9.30775	-3.43225	0.00538157	0.0468476	-2.56213	CG31534
FBgn0011016	0.0979511	11.6885	3.43116	0.00539209	0.04689	-2.56409	SsRbeta
FBgn0003950	-0.166266	6.66018	-3.43074	0.00539615	0.046893	-2.56484	unc
FBgn0015221	0.102476	12.9651	3.42967	0.00540652	0.0469185	-2.56676	Fer2LCH
FBgn0033900	-0.112737	8.28426	-3.42996	0.00540375	0.0469185	-2.56625	CG8257
FBgn0002069	-0.120087	11.7699	-3.42803	0.00542242	0.0470242	-2.5697	Aats-asp
FBgn0035770	0.171982	11.5618	3.42503	0.00545168	0.0472454	-2.57508	pst
FBgn0052021	-0.140137	6.33015	-3.42433	0.00545854	0.0472724	-2.57634	CG32021
FBgn0053080	0.337814	8.51429	3.42326	0.00546901	0.0473306	-2.57826	CG33080
FBgn0004629	0.247314	11.5163	3.41578	0.00554288	0.0479041	-2.59168	Cys
FBgn0035063	-0.177298	9.04664	-3.41586	0.0055421	0.0479041	-2.59154	Eap
FBgn0029672	-0.184661	10.2138	-3.4127	0.00557351	0.048103	-2.59719	CG2875
FBgn0036271	0.12801	8.68965	3.41302	0.00557038	0.048103	-2.59663	Pbgs
FBgn0037696	-0.13703	8.72388	-3.41184	0.00558219	0.0481449	-2.59875	CG9362
FBgn0000356	-0.292082	13.1079	-3.41045	0.00559605	0.0482315	-2.60123	Cp16
FBgn0054008	-0.102484	8.21588	-3.40912	0.00560944	0.048314	-2.60362	CG34008
FBgn0037899	-0.186258	11.6092	-3.4076	0.00562479	0.0484131	-2.60635	RpL24-like
FBgn0000411	-0.38177	7.30478	-3.40648	0.00563603	0.0484448	-2.60835	D
FBgn0026239	-0.14379	8.80604	-3.40589	0.00564201	0.0484448	-2.60941	gukh
FBgn0032377	-0.175631	6.60467	-3.40591	0.00564179	0.0484448	-2.60937	CG14937
FBgn0035207	-0.132241	8.90891	-3.40571	0.00564383	0.0484448	-2.60973	CG9153
FBgn0036665	0.170741	6.80523	3.40377	0.00566352	0.0485148	-2.61321	CG13024
FBgn0038601	-0.132187	10.1843	-3.40411	0.0056601	0.0485148	-2.61261	CG18600
FBgn0041712	0.298984	9.79869	3.40448	0.00565636	0.0485148	-2.61195	yellow-d
FBgn0035153	-0.191683	9.75544	-3.40135	0.00568815	0.0486927	-2.61755	CG3371
FBgn0000527	0.109933	6.6672	3.40033	0.00569858	0.0487283	-2.61938	e
FBgn0052207	-0.313468	8.63231	-3.40019	0.00570003	0.0487283	-2.61964	CR32207
FBgn0003257	-0.212041	10.5869	-3.39951	0.00570702	0.048755	-2.62086	r-l
FBgn0033905	0.246473	8.07054	3.39895	0.00571275	0.048771	-2.62186	CG18324
FBgn0040227	-0.105621	12.2632	-3.39847	0.00571764	0.0487797	-2.62272	eIF-3p66
FBgn0028525	-0.287643	9.30988	-3.39754	0.00572714	0.0488276	-2.62438	c(2)M
FBgn0034468	0.341447	8.76342	3.39717	0.00573099	0.0488276	-2.62505	Obp56a
FBgn0052483	0.376503	8.78286	3.39471	0.00575637	0.0490107	-2.62947	CG32483
FBgn0028274	-0.138929	10.0351	-3.39404	0.00576324	0.0490361	-2.63066	ns3
FBgn0033924	-0.158941	9.52942	-3.39291	0.00577499	0.049103	-2.6327	CG8613
FBgn0032335	-0.465128	6.55938	-3.39191	0.00578529	0.0491574	-2.63448	CG14915
FBgn0028516	-0.137461	10.2725	-3.39115	0.00579325	0.0491706	-2.63585	ZnT35C
FBgn0033079	0.363337	8.88505	3.39102	0.00579463	0.0491706	-2.63609	Fmo-2
FBgn0037538	-0.13256	8.8418	-3.3903	0.00580207	0.0492007	-2.63737	CG3223
FBgn0003334	-0.117523	10.6003	-3.38932	0.00581233	0.0492545	-2.63914	Scm
FBgn0026315	0.173237	8.38309	3.38648	0.00584195	0.0494723	-2.64422	Ugt35a
FBgn0035768	-0.304047	11.3735	-3.38475	0.00586017	0.0495865	-2.64733	CG14834
FBgn0040262	0.128119	6.61171	3.38445	0.0058633	0.0495865	-2.64786	Ugt36Ba
FBgn0000052	-0.17973	10.2208	-3.38283	0.00588034	0.0496641	-2.65076	ade2
FBgn0035540	-0.139606	9.00171	-3.38295	0.00587912	0.0496641	-2.65056	Syx17
FBgn0038412	0.141349	7.36708	3.38182	0.00589103	0.0496879	-2.65258	Zip3
FBgn0038627	0.146735	8.53561	3.38183	0.00589091	0.0496879	-2.65256	CG7694
FBgn0013725	-0.133031	7.01996	-3.38006	0.00590967	0.0497106	-2.65574	phyl
FBgn0032780	0.135388	6.95331	3.37897	0.0059213	0.0497106	-2.6577	CG13085
FBgn0033169	-0.203812	9.33837	-3.37966	0.00591392	0.0497106	-2.65646	CG11123
FBgn0035892	-0.121403	9.09333	-3.37924	0.00591838	0.0497106	-2.65721	exo70
FBgn0037815	-0.142772	7.776	-3.37929	0.00591789	0.0497106	-2.65712	Rrp46
FBgn0083077	-0.0935632	7.24124	-3.38078	0.00590207	0.0497106	-2.65445	mld
FBgn0085359	0.390382	9.66916	3.37994	0.00591093	0.0497106	-2.65595	CG34330
FBgn0034909	0.217467	8.15187	3.37778	0.00593395	0.0497836	-2.65983	CG4797
FBgn0003448	-0.355562	6.63577	-3.37546	0.00595874	0.0499266	-2.664	sna
FBgn0038893	-0.140432	8.20097	-3.37544	0.00595891	0.0499266	-2.66403	CG6353
FBgn0003396	-0.182331	9.52909	-3.37357	0.00597894	0.0499698	-2.66738	shn
FBgn0261938	-0.219789	8.75466	-3.3741	0.00597327	0.0499698	-2.66643	mtRNApol
FBgn0033942	1.02921	8.97944	3.37348	0.00597991	0.0499698	-2.66754	Cpr51A
FBgn0037323	0.235665	6.75003	3.37419	0.00597234	0.0499698	-2.66628	CG2663
FBgn0010109	-0.223563	6.5458	-3.37162	0.00599993	0.0500378	-2.67088	dpn
FBgn0037051	-0.146022	10.9701	-3.37198	0.0059961	0.0500378	-2.67024	CG10565
FBgn0038590	-0.185517	7.665	-3.37163	0.00599984	0.0500378	-2.67087	CG12320
FBgn0261963	-0.263874	6.74206	-3.37105	0.00600613	0.0500564	-2.67191	mid
FBgn0032140	-0.200486	9.14128	-3.37029	0.00601428	0.0500912	-2.67327	CG13117
FBgn0051259	0.449451	6.9072	3.36982	0.00601938	0.0501006	-2.67411	CG31259
FBgn0039127	-0.0830926	6.27621	-3.36884	0.00603002	0.0501561	-2.67588	CG13602
FBgn0037762	0.261951	10.5457	3.36843	0.00603442	0.0501596	-2.67661	eloF
FBgn0261610	-0.158365	7.00843	-3.36656	0.00605469	0.0502626	-2.67996	CG42699
FBgn0038244	-0.162212	9.77513	-3.36655	0.00605478	0.0502626	-2.67997	CG7987
FBgn0031520	0.18624	7.05064	3.36369	0.00608606	0.0504891	-2.68512	CG8837
FBgn0036844	-0.103112	8.77609	-3.36268	0.0060971	0.0505474	-2.68693	Mkp3
FBgn0039436	1.03585	7.97681	3.36079	0.00611784	0.0506861	-2.69032	TwdlB
FBgn0035244	-0.14346	9.36672	-3.35942	0.00613293	0.0507445	-2.69278	ABCB7
FBgn0037684	0.337941	8.84228	3.35953	0.00613161	0.0507445	-2.69256	CG8129
FBgn0000229	0.145709	8.60284	3.3579	0.00614963	0.050816	-2.69549	bsk
FBgn0036015	-0.287017	9.482	-3.35822	0.00614608	0.050816	-2.69492	CG3088
FBgn0030679	-0.189172	10.949	-3.35538	0.00617753	0.0510132	-2.70001	CG8206
FBgn0031078	-0.120114	10.0243	-3.35398	0.00619306	0.051108	-2.70252	CG11943
FBgn0033987	-0.136462	7.07183	-3.35282	0.00620607	0.0511484	-2.70462	CG12424
FBgn0035049	0.115595	7.00497	3.3529	0.00620512	0.0511484	-2.70446	Mmp1
FBgn0022160	0.285812	9.85837	3.35229	0.00621193	0.0511633	-2.70556	Gpo-1
FBgn0004698	-0.141814	10.4615	-3.35087	0.00622786	0.051261	-2.70812	mus210
FBgn0011260	-0.153267	11.3377	-3.34871	0.00625209	0.0514269	-2.71199	Sema-2a
FBgn0003462	0.10653	12.2205	3.34755	0.00626509	0.0515002	-2.71407	Sod
FBgn0001203	0.16238	8.03029	3.34451	0.00629945	0.051749	-2.71952	Hk
FBgn0038275	-0.195234	8.89779	-3.3408	0.00634154	0.0520609	-2.72617	CG3817
FBgn0029870	-0.0996507	11.3357	-3.34	0.00635073	0.0521024	-2.72762	Marf
FBgn0027085	-0.113209	9.12197	-3.33825	0.00637077	0.0521989	-2.73076	Aats-leu
FBgn0033724	0.121809	6.48964	3.33852	0.00636759	0.0521989	-2.73026	CG8501
FBgn0021800	-0.165998	9.45951	-3.33759	0.00637831	0.0522097	-2.73194	l(2)k16918
FBgn0051380	0.139801	6.98811	3.33705	0.00638449	0.0522097	-2.73291	CG31380
FBgn0052405	0.263655	7.26309	3.33736	0.00638091	0.0522097	-2.73235	Cpr65Av
FBgn0046685	0.141739	9.38198	3.33504	0.0064076	0.0523647	-2.73651	Wsck
FBgn0029762	0.380957	8.06272	3.33458	0.00641288	0.0523739	-2.73734	NAAT1
FBgn0037580	0.138676	11.4669	3.33406	0.00641886	0.0523889	-2.73827	DppIII
FBgn0004198	-0.19834	7.01769	-3.33179	0.00644517	0.0525696	-2.74235	ct
FBgn0033182	-0.114522	8.12967	-3.33099	0.00645443	0.0526111	-2.74378	CG1621
FBgn0030259	0.0959558	6.19333	3.33054	0.00645969	0.05262	-2.74459	CG1545
FBgn0029866	0.253561	8.5193	3.33014	0.00646426	0.0526233	-2.7453	CG3842
FBgn0034523	-0.167282	8.11817	-3.32885	0.0064793	0.0527116	-2.74762	Nnf1a
FBgn0036193	-0.122702	8.52673	-3.32842	0.00648433	0.0527186	-2.74839	CG14135
FBgn0034054	-0.176563	9.10834	-3.32786	0.00649088	0.0527379	-2.7494	CG8366
FBgn0029804	0.179367	7.76436	3.32737	0.00649655	0.05275	-2.75027	CG3097
FBgn0014396	-0.168327	6.83414	-3.32431	0.00653238	0.0529727	-2.75576	tim
FBgn0027780	-0.145941	8.07588	-3.32434	0.00653208	0.0529727	-2.75571	U26
FBgn0051673	-0.150026	10.2676	-3.32308	0.00654685	0.053056	-2.75797	CG31673
FBgn0261535	-0.218215	9.14399	-3.32231	0.00655602	0.0530621	-2.75936	l(2)34Fd
FBgn0037205	-0.189036	8.4527	-3.3225	0.0065537	0.0530621	-2.75901	CG11133
FBgn0038805	-0.100754	10.1119	-3.3203	0.00657974	0.0531859	-2.76296	TFAM
FBgn0086519	0.388372	6.90437	3.32056	0.00657666	0.0531859	-2.7625	Cpr47Eg
FBgn0034089	0.124899	10.4185	3.31528	0.00663939	0.0536337	-2.77197	CG8446
FBgn0030332	0.303503	9.79378	3.31478	0.00664542	0.0536481	-2.77287	CG9360
FBgn0039312	0.288032	10.4639	3.3119	0.00667992	0.0538921	-2.77804	CG10514
FBgn0035471	0.113664	11.7587	3.30994	0.00670349	0.0540477	-2.78155	Sc2
FBgn0003248	-0.227282	8.29046	-3.30817	0.00672485	0.0541507	-2.78472	Rh2
FBgn0039488	-0.107718	9.02984	-3.30846	0.00672142	0.0541507	-2.78421	CG6066
FBgn0031702	0.340248	9.09236	3.3061	0.00675002	0.0542689	-2.78844	fusl
FBgn0040236	-0.120996	9.40254	-3.30627	0.00674798	0.0542689	-2.78814	c11.1
FBgn0052834	0.314872	8.65552	3.3059	0.00675243	0.0542689	-2.7888	CG32834
FBgn0050413	0.602105	7.12242	3.30416	0.00677358	0.0543732	-2.79192	CG30413
FBgn0060296	-0.133659	7.37445	-3.30413	0.00677402	0.0543732	-2.79198	pain
FBgn0037150	0.108363	9.42215	3.30287	0.00678935	0.0544616	-2.79424	CG7133
FBgn0036616	0.217852	8.79634	3.30216	0.006798	0.0544963	-2.79551	CG4893
FBgn0040942	0.226848	7.1124	3.30103	0.00681185	0.0545727	-2.79754	CG12643
FBgn0039204	-0.181065	9.06986	-3.30044	0.00681909	0.054596	-2.79859	CG6607
FBgn0037057	0.292719	9.64653	3.29849	0.00684304	0.054753	-2.80209	CG10512
FBgn0039404	-0.178166	9.11375	-3.29482	0.00688847	0.0550816	-2.80869	CG14543
FBgn0013323	-0.183196	6.53368	-3.29329	0.00690748	0.0551986	-2.81143	Ptth
FBgn0040837	0.170661	6.91143	3.29278	0.00691377	0.0552139	-2.81234	CG8620
FBgn0037759	-0.157226	7.81345	-3.29198	0.00692372	0.0552584	-2.81377	CG8526
FBgn0261396	0.132511	11.2266	3.28931	0.00695713	0.0554548	-2.81857	Rpn3
FBgn0032233	-0.142985	6.73969	-3.28962	0.00695325	0.0554548	-2.81801	dpr19
FBgn0039728	0.341361	6.82058	3.28802	0.00697334	0.055549	-2.82089	CG7896
FBgn0051665	-0.117341	7.04516	-3.28697	0.00698657	0.0556192	-2.82278	CG31665
FBgn0261111	-0.124866	8.13585	-3.28657	0.00699149	0.0556233	-2.82348	BHD
FBgn0032845	-0.126827	8.35506	-3.28621	0.00699607	0.0556247	-2.82413	CG10747
FBgn0032237	0.0861151	13.052	3.28302	0.00703637	0.0558747	-2.82985	CG5362
FBgn0035168	-0.116427	6.55806	-3.28333	0.00703244	0.0558747	-2.8293	CG13889
FBgn0039355	-0.166442	8.50577	-3.27956	0.00708035	0.0561886	-2.83606	CG4730
FBgn0032835	0.274487	9.05328	3.27744	0.00710747	0.0563684	-2.83987	CG16772
FBgn0015617	-0.098483	9.90785	-3.27635	0.0071214	0.0564433	-2.84182	Cdk7
FBgn0022029	-0.149225	10.1914	-3.2759	0.00712722	0.056454	-2.84264	l(2)k01209
FBgn0261286	-0.20594	9.37573	-3.27544	0.00713306	0.0564648	-2.84345	Mat89Ba
FBgn0262512	0.0993063	11.7348	3.27176	0.0071806	0.0567344	-2.85007	Vha14-1
FBgn0033437	0.205594	7.45423	3.27203	0.00717703	0.0567344	-2.84957	CG12926
FBgn0053494	0.357178	8.91725	3.27182	0.00717981	0.0567344	-2.84996	CG33494
FBgn0016660	-0.126882	6.61054	-3.27016	0.00720132	0.0568367	-2.85294	H15
FBgn0034200	0.274368	10.0289	3.26971	0.00720706	0.0568367	-2.85373	CG11395
FBgn0035982	0.305288	10.7378	3.26978	0.00720618	0.0568367	-2.85361	CG4461
FBgn0015562	-0.118109	9.77358	-3.26667	0.00724676	0.0571141	-2.8592	veg
FBgn0038056	-0.112179	9.62443	-3.26607	0.00725456	0.0571398	-2.86027	CG5961
FBgn0011723	-0.102522	6.55042	-3.26511	0.0072671	0.0571821	-2.86199	byn
FBgn0023214	-0.118235	7.77248	-3.26497	0.00726899	0.0571821	-2.86225	edl
FBgn0035315	-0.684149	6.85639	-3.26341	0.00728935	0.0573065	-2.86504	CG8960
FBgn0038890	-0.166658	7.37382	-3.26281	0.0072973	0.0573333	-2.86612	CG7956
FBgn0035090	0.24463	10.149	3.26244	0.00730209	0.0573352	-2.86678	CG2736
FBgn0261800	-0.15793	8.96239	-3.26162	0.00731295	0.0573848	-2.86826	LanB1
FBgn0035777	0.228373	6.65337	3.26065	0.0073257	0.0574298	-2.86999	CG8563
FBgn0039529	-0.217674	8.59359	-3.26015	0.00733233	0.0574298	-2.87089	CG5612
FBgn0039829	-0.253466	9.18758	-3.26037	0.00732949	0.0574298	-2.87051	CG15561
FBgn0033301	0.36025	7.3393	3.25877	0.00735061	0.0575372	-2.87337	CG12780
FBgn0031090	-0.134712	7.50744	-3.25754	0.00736696	0.0576294	-2.87558	Rab35
FBgn0003401	-0.104247	10.0821	-3.25665	0.00737871	0.0576499	-2.87717	shu
FBgn0052695	0.274939	9.272	3.25699	0.00737427	0.0576499	-2.87657	CG32695
FBgn0024491	-0.102539	10.3861	-3.25311	0.00742591	0.0579827	-2.88352	Bin1
FBgn0030286	-0.203133	9.38562	-3.25016	0.00746552	0.0582458	-2.88881	CG1657
FBgn0030340	0.331614	6.8785	3.24992	0.00746883	0.0582458	-2.88925	CG15740
FBgn0037534	0.173789	9.6507	3.24879	0.00748406	0.0583286	-2.89128	CG2781
FBgn0038865	0.251727	7.87529	3.24782	0.00749718	0.0583947	-2.89302	CG10824
FBgn0002735	-0.147218	6.5145	-3.24706	0.00750738	0.0584381	-2.89438	HLHmgamma
FBgn0033730	0.249012	6.81467	3.24589	0.00752321	0.0584891	-2.89647	Cpr49Ag
FBgn0033810	-0.0987222	8.912	-3.24595	0.00752241	0.0584891	-2.89637	CG4646
FBgn0003392	-0.102616	8.89802	-3.24492	0.0075364	0.0585298	-2.89822	shi
FBgn0015222	0.123442	13.1582	3.24482	0.00753772	0.0585298	-2.89839	Fer1HCH
FBgn0262139	0.152329	6.89291	3.24216	0.00757405	0.0587418	-2.90318	trh
FBgn0032915	-0.173296	9.98067	-3.24214	0.00757433	0.0587418	-2.90321	CG12050
FBgn0037076	-0.17233	8.32065	-3.24056	0.00759597	0.0588734	-2.90605	CG12972
FBgn0031474	0.119336	10.2701	3.23805	0.00763033	0.0590463	-2.91054	CG2991
FBgn0031483	-0.142694	10.5088	-3.23791	0.00763231	0.0590463	-2.9108	CG9641
FBgn0033395	0.179083	6.94462	3.23795	0.0076317	0.0590463	-2.91072	Cyp4p2
FBgn0015553	-0.104645	10.5023	-3.23505	0.00767176	0.0593151	-2.91593	tos
FBgn0038873	0.227802	6.47319	3.2333	0.00769605	0.0594367	-2.91907	CG5892
FBgn0036188	-0.171404	8.26409	-3.23262	0.00770542	0.059466	-2.92028	CG7339
FBgn0028370	-0.138467	6.58611	-3.23139	0.00772256	0.0595315	-2.92249	kek3
FBgn0029999	-0.148891	8.71111	-3.23125	0.00772455	0.0595315	-2.92275	CG1575
FBgn0036888	-0.093058	10.7501	-3.231	0.00772805	0.0595315	-2.9232	CG9330
FBgn0030417	-0.0953373	6.32798	-3.22711	0.00778243	0.0599138	-2.93017	CG15725
FBgn0033046	0.149492	6.30613	3.22658	0.00778981	0.0599341	-2.93112	CG14470
FBgn0035337	-0.171601	9.35911	-3.22615	0.00779593	0.0599446	-2.9319	CG15877
FBgn0008654	-0.196834	8.16247	-3.22503	0.0078116	0.0599914	-2.9339	Su(z)2
FBgn0039519	0.303163	7.8517	3.22511	0.00781047	0.0599914	-2.93375	Cyp6a18
FBgn0053192	0.350406	8.97519	3.2247	0.00781628	0.0599914	-2.93449	MtnD
FBgn0031775	-0.170553	6.92901	-3.22368	0.00783065	0.0600651	-2.93632	CG9150
FBgn0029128	0.257379	7.1119	3.22171	0.00785858	0.0601696	-2.93986	tyn
FBgn0037310	-0.128926	6.44886	-3.22191	0.0078557	0.0601696	-2.93949	Tim17b1
FBgn0038475	-0.13527	7.79231	-3.22173	0.00785835	0.0601696	-2.93983	Keap1
FBgn0000810	-0.153553	9.29171	-3.21877	0.00790035	0.0604528	-2.94513	fs(1)K10
FBgn0003423	-0.0905962	10.4468	-3.21635	0.00793492	0.0606267	-2.94947	slgA
FBgn0004110	-0.140049	6.33441	-3.21584	0.00794231	0.0606267	-2.9504	tin
FBgn0261862	0.258009	10.6428	3.21641	0.00793406	0.0606267	-2.94936	whd
FBgn0037714	0.434274	8.76124	3.21585	0.00794213	0.0606267	-2.95037	CG9396
FBgn0036233	0.139279	6.33996	3.21416	0.00796632	0.0607733	-2.9534	CG6947
FBgn0034641	-0.180784	9.72102	-3.2134	0.00797723	0.0608198	-2.95476	mahj
FBgn0034660	0.117865	6.74665	3.21289	0.00798462	0.0608393	-2.95568	lox2
FBgn0026192	-0.143923	10.2504	-3.21107	0.00801085	0.0608555	-2.95894	par-6
FBgn0029827	0.292604	7.71771	3.21167	0.00800215	0.0608555	-2.95786	CG6048
FBgn0036820	0.174438	10.531	3.21199	0.00799757	0.0608555	-2.95729	CG6852
FBgn0037517	0.190386	7.85564	3.21211	0.00799592	0.0608555	-2.95708	CG10086
FBgn0250871	0.207618	7.26115	3.2112	0.00800906	0.0608555	-2.95872	pot
FBgn0032809	0.200377	6.68708	3.20977	0.00802977	0.0609625	-2.96128	CG13078
FBgn0038941	0.225195	7.07213	3.2089	0.00804229	0.0610208	-2.96283	CG7080
FBgn0028506	-0.122428	10.7469	-3.20751	0.00806249	0.0611373	-2.96533	CG4455
FBgn0034759	0.205187	6.87327	3.2059	0.00808602	0.0612678	-2.96822	CG13511
FBgn0038734	0.216178	7.11016	3.20566	0.00808941	0.0612678	-2.96864	CG11453
FBgn0034710	0.105355	6.35708	3.20236	0.0081378	0.0615973	-2.97457	CG3292
FBgn0032001	0.195803	9.8336	3.19817	0.0081996	0.0619989	-2.98208	CG8360
FBgn0035076	0.326172	7.76048	3.1981	0.00820068	0.0619989	-2.98222	Ance-5
FBgn0033948	0.178843	8.83629	3.1975	0.00820947	0.0620282	-2.98328	CG12863
FBgn0010407	0.09977	6.31403	3.19702	0.00821662	0.062045	-2.98414	Ror
FBgn0035229	-0.123024	10.1294	-3.19649	0.00822441	0.0620668	-2.98509	CG7852
FBgn0036698	0.163411	7.85211	3.19494	0.00824748	0.0622037	-2.98787	CG7724
FBgn0028426	-0.105472	9.01429	-3.19365	0.00826681	0.0622837	-2.99019	JhI-1
FBgn0038197	-0.0758102	8.88816	-3.19324	0.0082729	0.0622837	-2.99093	foxo
FBgn0039444	1.24273	8.54316	3.19345	0.00826979	0.0622837	-2.99055	TwdlD
FBgn0020766	-0.0877422	9.02542	-3.19075	0.00831019	0.0625271	-2.99539	Aats-phe
FBgn0035859	0.337437	6.79199	3.18946	0.00832955	0.0626355	-2.99771	CG13678
FBgn0020385	0.196406	10.1772	3.18857	0.00834291	0.0626985	-2.9993	pug
FBgn0004650	-0.141189	10.494	-3.18568	0.00838658	0.0629792	-3.00448	fs(1)N
FBgn0034045	0.144641	7.12829	3.18544	0.00839024	0.0629792	-3.00492	CG8249
FBgn0036768	0.14295	6.9299	3.18407	0.008411	0.0630627	-3.00737	CG7402
FBgn0037744	0.104886	10.2045	3.18404	0.00841136	0.0630627	-3.00741	CG8417
FBgn0259142	-0.0999494	9.0589	-3.18339	0.00842124	0.0630993	-3.00858	Snp
FBgn0015477	-0.106649	9.99361	-3.1829	0.00842878	0.0631183	-3.00947	Rme-8
FBgn0032925	-0.190134	10.2166	-3.18256	0.008434	0.0631199	-3.01008	CG9246
FBgn0034063	-0.12065	8.82575	-3.17886	0.00849047	0.0634911	-3.01671	CG8389
FBgn0037424	1.32246	7.79099	3.17832	0.0084987	0.0634911	-3.01767	Osi15
FBgn0038449	0.324461	9.38255	3.17863	0.00849406	0.0634911	-3.01713	CG17562
FBgn0001324	-0.132881	8.1878	-3.17554	0.00854159	0.0636985	-3.02267	kto
FBgn0028509	-0.285275	9.36187	-3.17568	0.00853941	0.0636985	-3.02242	cenG1A
FBgn0032170	-0.0878302	8.64584	-3.17593	0.00853556	0.0636985	-3.02197	CG4658
FBgn0004872	-0.17461	10.288	-3.17248	0.00858888	0.0640133	-3.02815	piwi
FBgn0030925	0.139672	7.05524	3.17191	0.00859768	0.064041	-3.02917	CG6361
FBgn0035146	0.220423	7.99114	3.17054	0.00861896	0.0641238	-3.03162	CG13893
FBgn0052751	0.285026	7.33197	3.1707	0.00861657	0.0641238	-3.03135	CG32751
FBgn0029710	-0.144404	7.48839	-3.16784	0.00866121	0.0642542	-3.03648	CG3568
FBgn0030711	-0.104316	10.4915	-3.16779	0.00866195	0.0642542	-3.03656	CG8928
FBgn0034784	0.158905	6.49934	3.16891	0.00864446	0.0642542	-3.03455	CG9826
FBgn0036550	0.135266	7.47728	3.16789	0.00866035	0.0642542	-3.03638	CG17026
FBgn0083972	0.177077	7.68338	3.16855	0.00865001	0.0642542	-3.03519	CG34136
FBgn0003900	-0.21885	6.48509	-3.16687	0.00867628	0.0643227	-3.0382	twi
FBgn0035113	0.264773	6.63883	3.16617	0.00868728	0.0643665	-3.03946	pyx
FBgn0034270	-0.230622	8.888	-3.16584	0.00869246	0.064367	-3.04005	CG6401
FBgn0032477	0.132998	8.75653	3.16267	0.00874233	0.0646984	-3.04573	CG5287
FBgn0003885	-0.105275	6.68982	-3.16129	0.0087642	0.0648222	-3.04821	alphaTub84D
FBgn0011336	0.0977762	10.6387	3.15986	0.00878689	0.064952	-3.05077	OstStt3
FBgn0036824	0.127944	11.7514	3.15818	0.00881365	0.0650735	-3.05379	CG3902
FBgn0039776	0.228858	9.78907	3.15823	0.00881284	0.0650735	-3.0537	PH4alphaEFB
FBgn0003870	-0.133441	8.94812	-3.15768	0.00882161	0.0650942	-3.05469	ttk
FBgn0031111	-0.242132	10.102	-3.15562	0.00885451	0.0652743	-3.05838	Obp19c
FBgn0033482	-0.14463	10.2218	-3.1555	0.00885636	0.0652743	-3.05859	CG1371
FBgn0033465	0.134563	10.2638	3.15421	0.00887702	0.0653883	-3.0609	CG12140
FBgn0028789	-0.158172	6.81643	-3.15316	0.00889393	0.0654702	-3.06279	Doc1
FBgn0035205	-0.200801	9.44684	-3.15287	0.00889851	0.0654702	-3.0633	CG2469
FBgn0005674	-0.133425	11.086	-3.15253	0.00890397	0.0654722	-3.06391	Aats-glupro
FBgn0031479	-0.113823	9.77934	-3.15181	0.00891557	0.0655193	-3.0652	Prx6005
FBgn0040322	0.14691	7.45704	3.14966	0.00895032	0.0657364	-3.06906	GNBP2
FBgn0037488	0.169837	6.7398	3.14886	0.00896326	0.0657931	-3.07049	CG14607
FBgn0038787	-0.12036	9.97067	-3.1472	0.00899021	0.0659526	-3.07347	CG4360
FBgn0003411	-0.136067	6.67264	-3.14666	0.00899895	0.0659784	-3.07443	sisA
FBgn0010762	-0.161004	9.15882	-3.14417	0.00903963	0.0661692	-3.07891	simj
FBgn0030583	-0.220694	7.06241	-3.14427	0.00903792	0.0661692	-3.07872	CG14410
FBgn0030587	0.104795	5.7953	3.14378	0.00904596	0.0661692	-3.0796	CG9522
FBgn0037298	0.128784	10.9927	3.14378	0.00904596	0.0661692	-3.0796	CG2604
FBgn0035247	-0.101909	9.34125	-3.14187	0.00907713	0.0663587	-3.08301	metl
FBgn0029863	0.163256	8.07071	3.14129	0.00908678	0.0663908	-3.08407	CG3823
FBgn0038458	-0.13496	6.53373	-3.14058	0.00909836	0.066437	-3.08533	VhaM9.7-d
FBgn0027512	-0.136702	12.5119	-3.13888	0.00912636	0.0666029	-3.08838	CG10254
FBgn0014366	-0.104642	10.5464	-3.13847	0.00913321	0.0666144	-3.08912	noi
FBgn0003720	-0.189639	6.32022	-3.13788	0.00914292	0.0666466	-3.09017	tll
FBgn0037583	-0.106968	10.4632	-3.13622	0.00917032	0.0668078	-3.09314	CG9684
FBgn0029821	0.325401	10.1758	3.13537	0.00918454	0.0668727	-3.09468	CG4020
FBgn0038819	0.158649	6.23871	3.13407	0.009206	0.0669518	-3.09699	Cpr92F
FBgn0053108	-0.140877	7.3032	-3.13438	0.00920089	0.0669518	-3.09644	CG33108
FBgn0033826	0.387375	9.36175	3.13306	0.00922291	0.0669542	-3.09881	CG4734
FBgn0036956	-0.108231	6.86479	-3.13308	0.0092225	0.0669542	-3.09877	CG13813
FBgn0051431	0.176964	7.41912	3.13345	0.00921641	0.0669542	-3.09811	CG31431
FBgn0052602	-0.244593	10.9797	-3.13278	0.00922756	0.0669542	-3.09931	Muc12Ea
FBgn0038017	0.605878	7.79842	3.13223	0.0092368	0.0669827	-3.1003	CG4115
FBgn0040060	0.267813	12.9494	3.13107	0.00925609	0.067084	-3.10237	yip7
FBgn0034514	-0.741761	7.22673	-3.12863	0.00929711	0.0673427	-3.10675	CG13427
FBgn0031144	0.142988	8.49678	3.12439	0.00936856	0.0678213	-3.11434	CG1529
FBgn0030239	0.106676	10.034	3.124	0.00937523	0.0678307	-3.11505	CG17333
FBgn0025879	0.203995	9.97867	3.12339	0.0093855	0.0678644	-3.11613	Timp
FBgn0034817	-0.196739	9.03335	-3.12309	0.00939065	0.0678644	-3.11668	Art7
FBgn0026611	-0.186089	10.7681	-3.12267	0.00939777	0.067877	-3.11743	AGO1
FBgn0004864	-0.109923	9.91535	-3.12151	0.0094175	0.067898	-3.11951	hop
FBgn0021768	-0.117362	10.9703	-3.12123	0.00942221	0.067898	-3.12	nudC
FBgn0028952	-0.116019	8.49056	-3.12131	0.00942083	0.067898	-3.11985	CG31672
FBgn0039184	0.334702	8.56801	3.12181	0.00941245	0.067898	-3.11897	CG6432
FBgn0014464	-0.434994	10.5005	-3.11867	0.00946599	0.0681357	-3.12459	Cp7Fa
FBgn0035781	-0.235567	12.1619	-3.11872	0.00946506	0.0681357	-3.1245	CG8560
FBgn0259745	-0.133197	10.6928	-3.11807	0.00947615	0.06817	-3.12566	wech
FBgn0034783	0.371486	6.63178	3.11294	0.00956459	0.068767	-3.13486	CG9825
FBgn0051072	0.151865	9.06758	3.1119	0.00958259	0.0688571	-3.13672	Lerp
FBgn0036187	-0.103305	9.57248	-3.11121	0.00959458	0.0689041	-3.13796	CG11660
FBgn0052024	0.209796	7.66809	3.11019	0.00961225	0.0689917	-3.13979	CG32024
FBgn0033129	0.213992	7.79978	3.10807	0.00964915	0.0692172	-3.14358	Tsp42Eh
FBgn0003074	0.09177	12.2356	3.10702	0.00966745	0.069309	-3.14546	Pgi
FBgn0031970	0.145905	6.67395	3.10615	0.00968273	0.0693792	-3.14702	CG7227
FBgn0033113	0.139868	6.61167	3.10501	0.00970259	0.069482	-3.14905	Spn42Dc
FBgn0031435	-0.207187	10.2645	-3.1034	0.00973088	0.069645	-3.15193	CG9883
FBgn0036278	0.20654	7.75346	3.1012	0.00976979	0.0698839	-3.15589	GRHRII
NA	0.188421	11.9099	3.10088	0.00977545	0.0698848	-3.15646	NA
FBgn0039802	0.138048	9.18192	3.09933	0.00980293	0.0700416	-3.15924	dj-1beta
FBgn0020300	0.174287	8.25467	3.0986	0.00981582	0.0700543	-3.16054	gk
FBgn0033454	-0.219374	9.88818	-3.0986	0.00981578	0.0700543	-3.16054	CG1671
FBgn0032538	0.266668	7.45468	3.09668	0.00984991	0.0702199	-3.16397	CG16885
FBgn0040261	0.154058	6.27232	3.09667	0.00985016	0.0702199	-3.164	Ugt36Bb
FBgn0000557	0.262773	10.6982	3.0941	0.00989596	0.0704271	-3.16859	Ef1alpha100E
FBgn0032015	0.119195	10.4106	3.09422	0.00989381	0.0704271	-3.16837	CG7830
FBgn0259697	-0.1489	6.33453	-3.09446	0.00988962	0.0704271	-3.16796	nvd
FBgn0038680	0.294767	7.92105	3.09233	0.00992779	0.0706138	-3.17177	Cyp12a5
FBgn0022981	-0.105444	11.4081	-3.08976	0.00997393	0.070902	-3.17636	rpk
FBgn0040985	-0.109757	11.4977	-3.08909	0.00998606	0.0709482	-3.17756	CG6115
FBgn0030801	-0.148359	8.83692	-3.0882	0.0100022	0.071023	-3.17916	Rcp
FBgn0027611	0.422339	10.8884	3.08743	0.0100162	0.0710822	-3.18054	CG6206
FBgn0031077	-0.103071	7.65377	-3.08673	0.0100289	0.0711322	-3.1818	CG15618
FBgn0034606	-0.13369	6.96475	-3.08601	0.0100419	0.0711738	-3.18308	ASPP
FBgn0261799	0.10076	6.17648	3.08578	0.010046	0.0711738	-3.18349	dsx-c73A
FBgn0010105	-0.135638	7.49979	-3.0851	0.0100584	0.0712214	-3.1847	comm
FBgn0034970	-0.106171	10.0282	-3.08339	0.0100896	0.0714026	-3.18777	yki
FBgn0036979	0.126469	6.12482	3.07994	0.0101527	0.0718087	-3.19394	CG13247
FBgn0039178	0.121744	6.89109	3.0788	0.0101737	0.0719167	-3.19598	CG6356
FBgn0034053	0.149003	7.1275	3.07799	0.0101887	0.0719824	-3.19744	Cyp4aa1
FBgn0035208	0.474577	6.51182	3.07672	0.0102121	0.0721073	-3.19971	CG9184
FBgn0016977	-0.139475	9.78345	-3.07536	0.0102373	0.072225	-3.20215	spen
FBgn0030291	-0.163756	8.78913	-3.07489	0.0102459	0.072225	-3.20298	CG1738
FBgn0051832	0.16375	6.5043	3.07507	0.0102426	0.072225	-3.20266	CG31832
FBgn0034883	0.264116	7.99721	3.07385	0.0102652	0.0723209	-3.20485	CG17664
FBgn0033846	-0.153549	9.64723	-3.07174	0.0103045	0.0725573	-3.20863	mip120
FBgn0052354	0.0848944	6.95623	3.07075	0.010323	0.0726465	-3.21039	CG32354
FBgn0032262	-0.174827	9.89949	-3.07	0.0103369	0.0727042	-3.21173	CG7384
FBgn0010041	0.119457	6.24052	3.06752	0.0103835	0.0729787	-3.21617	GstD5
FBgn0045035	-0.180966	8.75378	-3.06731	0.0103875	0.0729787	-3.21656	tefu
FBgn0036115	-0.187696	10.2671	-3.06655	0.0104017	0.0730379	-3.21791	CG6327
FBgn0038752	0.17773	7.87961	3.06416	0.0104468	0.0733136	-3.22219	CG4462
FBgn0050101	0.419327	7.38449	3.06241	0.01048	0.0735056	-3.22532	CG30101
FBgn0033945	0.113489	7.85104	3.06203	0.0104872	0.0735153	-3.226	CG12868
FBgn0040607	-0.147862	7.0199	-3.06002	0.0105254	0.073742	-3.2296	CG14244
FBgn0030206	-0.14365	8.19016	-3.05824	0.0105594	0.0738571	-3.23278	CG2889
FBgn0033667	0.181717	6.42462	3.05836	0.0105571	0.0738571	-3.23257	CG13183
FBgn0250876	-0.181014	7.8267	-3.05836	0.010557	0.0738571	-3.23256	Sema-5c
FBgn0032050	-0.165767	9.88017	-3.05663	0.0105902	0.0740314	-3.23566	CG13096
FBgn0028693	0.115431	10.7898	3.05549	0.010612	0.0741017	-3.2377	Rpn12
FBgn0036764	-0.155571	10.3907	-3.05578	0.0106065	0.0741017	-3.23718	CG5535
FBgn0030000	-0.130647	7.72522	-3.05448	0.0106314	0.0741821	-3.2395	CG2260
FBgn0040106	-0.0959895	6.08106	-3.05428	0.0106352	0.0741821	-3.23986	lectin-21Cb
FBgn0036446	-0.182647	8.32351	-3.05348	0.0106507	0.074249	-3.2413	CG9384
FBgn0010424	0.118694	6.51179	3.05288	0.0106623	0.0742888	-3.24237	TpnC73F
FBgn0031250	0.100772	9.7364	3.05078	0.0107029	0.0744892	-3.24613	Ent1
FBgn0031374	-0.11178	9.87771	-3.05102	0.0106982	0.0744892	-3.2457	CG7337
FBgn0259175	0.18278	7.16867	3.05009	0.0107162	0.0745405	-3.24735	ome
FBgn0000146	-0.147208	10.2418	-3.04914	0.0107346	0.0746279	-3.24906	aub
FBgn0003390	0.201847	7.78881	3.04874	0.0107425	0.0746413	-3.24978	shf
FBgn0030509	0.122975	6.69613	3.04711	0.0107741	0.0747475	-3.25269	CG11162
FBgn0031309	-0.117713	9.83378	-3.04709	0.0107745	0.0747475	-3.25272	Tfb4
FBgn0037722	-0.118647	8.70361	-3.04704	0.0107755	0.0747475	-3.25281	CG8319
FBgn0034535	-0.109516	9.38975	-3.0452	0.0108115	0.074956	-3.25611	CG11110
FBgn0260745	0.173925	9.92411	3.04289	0.0108568	0.0752286	-3.26024	mfas
FBgn0015393	-0.0835231	12.633	-3.03897	0.0109341	0.0756393	-3.26724	hoip
FBgn0031589	-0.0998135	9.16295	-3.03937	0.0109261	0.0756393	-3.26653	CG3714
FBgn0039040	0.228029	7.73543	3.03913	0.010931	0.0756393	-3.26696	CG13833
FBgn0025627	-0.11816	6.64988	-3.0378	0.0109572	0.0757162	-3.26933	CG4194
FBgn0036785	-0.100333	6.12414	-3.03806	0.010952	0.0757162	-3.26886	CG13700
FBgn0029643	-0.0830233	6.62732	-3.03571	0.0109987	0.0759618	-3.27307	CG14420
FBgn0031623	-0.121287	6.30874	-3.03441	0.0110247	0.0760995	-3.2754	Taf12L
FBgn0037179	0.281586	6.55794	3.03233	0.0110663	0.0763449	-3.27912	CG14453
FBgn0032612	-0.179491	6.90288	-3.03152	0.0110825	0.0764147	-3.28056	CG13282
FBgn0001341	-0.229871	9.35403	-3.02973	0.0111184	0.0764371	-3.28376	l(1)1Bi
FBgn0015872	0.188369	8.36465	3.02944	0.0111243	0.0764371	-3.28428	Drip
FBgn0030063	-0.118901	9.33631	-3.03097	0.0110936	0.0764371	-3.28155	CG1789
FBgn0030478	0.111525	11.5509	3.02925	0.0111281	0.0764371	-3.28462	CG1640
FBgn0040688	-0.141969	6.41519	-3.03017	0.0111097	0.0764371	-3.28298	CG12483
FBgn0085365	-0.121273	6.86613	-3.0299	0.0111151	0.0764371	-3.28347	CG34336
FBgn0086357	0.142541	12.2151	3.03046	0.0111038	0.0764371	-3.28246	Sec61alpha
FBgn0051739	-0.140476	9.84009	-3.02674	0.0111789	0.0767436	-3.28911	CG31739
FBgn0028497	-0.10472	9.21519	-3.02612	0.0111915	0.0767469	-3.29023	CG3530
FBgn0038925	-0.153299	11.3262	-3.02631	0.0111875	0.0767469	-3.28987	Cchl
FBgn0031894	-0.189683	7.82451	-3.02311	0.0112526	0.077124	-3.2956	CG4496
FBgn0024177	-0.109694	11.5011	-3.02134	0.0112887	0.0773294	-3.29877	zpg
FBgn0030999	0.407031	11.3048	3.02077	0.0113004	0.0773674	-3.29979	Mur18B
FBgn0038665	0.165229	7.34884	3.01808	0.0113554	0.0777021	-3.30458	CG12269
FBgn0031581	0.306641	8.48424	3.01432	0.011433	0.0780293	-3.3113	CG10039
FBgn0033777	0.116301	10.3868	3.01508	0.0114173	0.0780293	-3.30994	CG17574
FBgn0036352	0.369111	6.89899	3.0151	0.0114168	0.0780293	-3.3099	CG14110
FBgn0037876	-0.181366	7.87634	-3.01427	0.0114341	0.0780293	-3.31139	CG4820
FBgn0038722	-0.0962489	10.1815	-3.01427	0.0114342	0.0780293	-3.3114	Nup58
FBgn0011824	-0.185608	11.1941	-3.01333	0.0114535	0.0780824	-3.31307	CG4038
FBgn0033616	-0.0941223	9.86694	-3.01329	0.0114543	0.0780824	-3.31314	CG7745
FBgn0031630	0.150841	7.08589	3.01208	0.0114795	0.0782116	-3.31531	CG15629
FBgn0040252	0.137985	6.42005	3.01098	0.0115023	0.078325	-3.31727	Ugt86Dh
FBgn0036448	-0.128721	10.4515	-3.0075	0.0115751	0.0787023	-3.32349	mop
FBgn0038490	-0.0934791	7.65715	-3.00744	0.0115764	0.0787023	-3.32361	CG5285
FBgn0063491	0.288297	10.4891	3.00749	0.0115752	0.0787023	-3.3235	GstE9
FBgn0038083	0.276226	7.00119	3.0071	0.0115834	0.0787072	-3.3242	CG5999
FBgn0000318	0.158975	10.6092	3.0062	0.0116023	0.0787801	-3.32581	cl
FBgn0027101	-0.191079	8.4299	-3.0057	0.0116129	0.0787801	-3.32671	Dyrk3
FBgn0034381	-0.0987933	6.88142	-3.00594	0.0116078	0.0787801	-3.32627	CG15088
FBgn0034570	-0.151437	8.07077	-3.00389	0.011651	0.0789543	-3.32994	CG10543
FBgn0035147	0.132392	9.83711	3.0039	0.0116507	0.0789543	-3.32991	CG12030
FBgn0050291	-0.138886	9.36849	-3.00267	0.0116768	0.0790862	-3.33212	CG30291
FBgn0039594	0.191528	9.76195	2.99828	0.01177	0.0796746	-3.33996	CG9990
FBgn0028746	0.119242	8.85653	2.99767	0.011783	0.0797202	-3.34105	CG18508
FBgn0010441	-0.109082	9.07029	-2.99705	0.0117961	0.0797625	-3.34215	pll
FBgn0036995	0.144809	6.58168	2.99678	0.0118019	0.0797625	-3.34263	CG5195
FBgn0040496	0.107083	6.40634	2.99447	0.0118514	0.0800543	-3.34676	CG17104
FBgn0033271	0.148654	7.16441	2.99342	0.011874	0.0801635	-3.34864	CG8708
FBgn0029067	-0.0981274	7.98069	-2.99288	0.0118857	0.0801999	-3.34961	l(1)G0269
FBgn0033184	-0.174033	9.58306	-2.99009	0.0119457	0.0805617	-3.35458	CG12736
FBgn0032249	-0.22144	7.31972	-2.98868	0.0119764	0.0807256	-3.35711	CG5337
FBgn0038113	0.101632	6.48667	2.98765	0.0119986	0.0808321	-3.35893	CG11668
FBgn0030510	-0.222068	9.44763	-2.98686	0.0120158	0.0809047	-3.36034	CG12177
FBgn0010303	-0.141756	8.19549	-2.98583	0.0120383	0.0810127	-3.36219	hep
FBgn0035438	0.0893309	11.7131	2.98553	0.0120448	0.0810133	-3.36272	PHGPx
FBgn0025687	0.160572	7.75077	2.98513	0.0120536	0.0810295	-3.36344	LKR
FBgn0032435	0.303053	7.85651	2.98418	0.0120744	0.0810399	-3.36514	Oatp33Eb
FBgn0038740	0.286929	7.73883	2.98443	0.0120689	0.0810399	-3.36469	CG4562
FBgn0250907	-0.247457	6.67599	-2.98427	0.0120723	0.0810399	-3.36497	Cht3
FBgn0002525	-0.163516	10.3878	-2.98289	0.0121026	0.0810995	-3.36744	Lam
FBgn0036289	0.368303	7.65296	2.98302	0.0120996	0.0810995	-3.3672	CG10657
FBgn0038957	-0.146829	7.18844	-2.98293	0.0121018	0.0810995	-3.36737	CG7059
FBgn0034603	-0.156551	8.85287	-2.98197	0.0121227	0.0811911	-3.36907	Glycogenin
FBgn0026575	-0.116464	11.1402	-2.97884	0.0121916	0.0816093	-3.37466	hang
FBgn0028573	0.209863	6.73124	2.97843	0.0122008	0.0816275	-3.3754	prc
FBgn0034480	-0.546008	8.1392	-2.9773	0.0122258	0.0817402	-3.37742	CG16898
FBgn0051032	-0.157548	6.89428	-2.97708	0.0122306	0.0817402	-3.37781	CR31032
FBgn0034515	0.259522	10.2504	2.97647	0.012244	0.0817585	-3.37889	CG13428
FBgn0039868	-0.154048	9.96376	-2.97553	0.0122649	0.0818394	-3.38057	CG11563
FBgn0002578	0.21794	8.00862	2.97516	0.0122732	0.0818514	-3.38123	m1
FBgn0033160	-0.121122	9.7444	-2.97485	0.0122801	0.0818544	-3.38179	CG11107
FBgn0040532	0.236526	10.2921	2.97453	0.0122871	0.081858	-3.38235	CG8369
FBgn0037654	-0.12173	6.68477	-2.97313	0.0123183	0.0820223	-3.38485	CG11983
FBgn0035281	0.451797	7.03347	2.9728	0.0123258	0.0820287	-3.38545	Cpr62Bc
FBgn0014127	-0.113909	10.5658	-2.97167	0.012351	0.0821537	-3.38746	barr
FBgn0033547	-0.116731	9.03902	-2.97128	0.0123597	0.0821682	-3.38816	CG12935
FBgn0004587	-0.0936565	7.96821	-2.97015	0.012385	0.0822925	-3.39017	B52
FBgn0001624	-0.090807	7.66157	-2.9686	0.01242	0.0824316	-3.39295	dlg1
FBgn0027279	-0.0943544	8.29602	-2.96855	0.012421	0.0824316	-3.39303	l(1)G0196
FBgn0039833	-0.122848	6.56056	-2.96806	0.012432	0.0824316	-3.3939	CG15564
FBgn0040324	-0.0915367	9.74624	-2.96809	0.0124314	0.0824316	-3.39385	Ephrin
FBgn0035470	-0.166221	7.83292	-2.96775	0.012439	0.0824342	-3.39445	CG14980
FBgn0024754	-0.117284	9.4003	-2.96519	0.0124968	0.0827299	-3.39902	Flo
FBgn0030914	-0.121428	6.73388	-2.96491	0.0125032	0.0827299	-3.39953	CG6106
FBgn0051267	0.302083	8.40943	2.96524	0.0124957	0.0827299	-3.39893	CG31267
FBgn0086706	-0.0938243	11.4464	-2.96434	0.0125161	0.0827718	-3.40054	pix
FBgn0039846	-0.153828	8.49849	-2.96382	0.0125279	0.0828063	-3.40147	CG11337
FBgn0261952	-0.13196	6.15644	-2.96259	0.0125559	0.0829475	-3.40366	srw
FBgn0029874	-0.211836	7.86211	-2.96171	0.0125758	0.0830357	-3.40523	CG3342
FBgn0000504	0.151629	7.73119	2.96105	0.0125909	0.0830611	-3.40641	dsx
FBgn0014427	-0.109798	10.7428	-2.96074	0.012598	0.0830611	-3.40696	CG11899
FBgn0034118	-0.104031	10.579	-2.96039	0.012606	0.0830611	-3.40759	Nup62
FBgn0260474	0.195611	7.21242	2.96063	0.0126005	0.0830611	-3.40716	CG30002
FBgn0033439	0.195611	7.21242	2.96063	0.0126005	0.0830611	-3.40716	CG1773
FBgn0052438	-0.10097	8.58504	-2.95956	0.0126249	0.0831423	-3.40906	Smc5
FBgn0004370	-0.106054	8.08653	-2.95637	0.0126981	0.0835063	-3.41476	Ptp10D
FBgn0032601	0.135582	7.61924	2.95629	0.0127	0.0835063	-3.4149	yellow-b
FBgn0041156	0.123292	6.43708	2.9564	0.0126974	0.0835063	-3.4147	exex
FBgn0036656	0.195801	7.34913	2.9553	0.0127227	0.0836121	-3.41666	CG13026
FBgn0000083	0.153542	10.3996	2.95481	0.012734	0.083643	-3.41754	AnnIX
FBgn0003165	-0.130301	10.7148	-2.95442	0.0127429	0.0836579	-3.41823	pum
FBgn0052856	-0.145903	8.0795	-2.9521	0.0127967	0.0839668	-3.42237	CG32856
FBgn0040950	0.129752	6.72928	2.95108	0.0128203	0.0840785	-3.42419	Muc26B
FBgn0053147	-0.114423	6.79529	-2.9507	0.0128292	0.0840929	-3.42487	Hs3st-A
FBgn0003510	-0.400693	7.02401	-2.94889	0.0128712	0.0843246	-3.42809	Sry-alpha
FBgn0027375	-0.132561	9.48328	-2.94821	0.0128872	0.0843248	-3.42931	RecQ5
FBgn0039055	-0.119028	10.1214	-2.94842	0.0128822	0.0843248	-3.42893	Rassf
FBgn0040383	0.208922	8.71091	2.94803	0.0128913	0.0843248	-3.42962	CG5254
FBgn0027581	-0.162278	9.56803	-2.94709	0.0129132	0.0844243	-3.43129	CG6191
FBgn0000357	-0.375624	12.9985	-2.94609	0.0129368	0.0844909	-3.43309	Cp18
FBgn0004462	-0.1222	9.47973	-2.94626	0.0129327	0.0844909	-3.43278	Pk17E
FBgn0036134	-0.126376	10.1509	-2.9454	0.0129529	0.0845523	-3.43431	fd68A
FBgn0025700	0.116627	11.8646	2.94434	0.0129778	0.084671	-3.4362	CG5885
FBgn0030672	-0.223203	10.0223	-2.94348	0.012998	0.0847456	-3.43773	CG9281
FBgn0250746	0.0950771	12.1197	2.94328	0.0130027	0.0847456	-3.43809	Prosbeta7
FBgn0003450	-0.0980971	7.64171	-2.94233	0.013025	0.0848185	-3.43978	snk
FBgn0259789	-0.162662	10.6537	-2.94224	0.0130273	0.0848185	-3.43995	vfl
FBgn0031260	0.185715	11.224	2.94144	0.013046	0.0848969	-3.44136	Spp
FBgn0038853	-0.110292	9.29679	-2.94038	0.0130711	0.0849755	-3.44325	RhoGAP93B
FBgn0052447	0.0963605	6.22142	2.94036	0.0130716	0.0849755	-3.44329	CG32447
FBgn0040296	-0.158479	6.61172	-2.93873	0.0131103	0.0851831	-3.4462	Ocho
FBgn0019686	-0.104066	11.8969	-2.93665	0.0131598	0.0854609	-3.44991	lok
FBgn0028982	-0.0981446	10.3274	-2.93509	0.0131969	0.0856579	-3.45268	Spt6
FBgn0036777	-0.210806	8.49344	-2.93441	0.0132132	0.0857193	-3.45389	CG7341
FBgn0037456	-0.0887593	5.952	-2.93356	0.0132338	0.0858088	-3.45542	CG1138
FBgn0001186	-0.103957	10.9493	-2.93215	0.0132674	0.0859827	-3.45792	Hex-A
FBgn0040491	-0.118538	7.64873	-2.93135	0.0132869	0.0860644	-3.45936	Buffy
FBgn0039530	-0.190076	6.7278	-2.93092	0.0132971	0.0860865	-3.46011	Tusp
FBgn0052177	-0.109421	9.78758	-2.92868	0.0133511	0.086392	-3.4641	CG32177
FBgn0030049	0.194971	7.19325	2.92664	0.0134006	0.0866232	-3.46774	Trf4-1
FBgn0038318	-0.118765	9.33095	-2.92671	0.0133989	0.0866232	-3.46761	CG6236
FBgn0004391	-0.175149	8.93439	-2.92628	0.0134094	0.0866361	-3.46839	shtd
FBgn0039348	-0.115225	11.6851	-2.92412	0.0134619	0.0869308	-3.47223	CG4673
FBgn0262519	-0.139707	10.884	-2.92279	0.0134944	0.0870513	-3.4746	Mi-2
FBgn0026250	-0.0830513	12.3187	-2.92306	0.0134877	0.0870513	-3.47411	eIF-1A
FBgn0036759	0.221109	8.49204	2.922	0.0135136	0.0870862	-3.476	CG5577
FBgn0262508	0.127522	8.42671	2.92212	0.0135108	0.0870862	-3.47579	CG43078
FBgn0046875	0.464675	7.04493	2.92129	0.0135312	0.087155	-3.47727	Obp83g
FBgn0035057	0.106275	6.32069	2.92041	0.0135527	0.0872492	-3.47884	CG3880
FBgn0038654	0.206093	7.16962	2.91915	0.0135835	0.0874028	-3.48107	CG14298
FBgn0035430	0.203595	6.59245	2.9175	0.0136244	0.087621	-3.48402	CG12009
FBgn0016131	-0.179909	9.27692	-2.9172	0.0136317	0.0876234	-3.48455	Cdk4
FBgn0030373	-0.130685	8.83255	-2.9168	0.0136417	0.0876338	-3.48527	CG12721
FBgn0042083	-0.0942392	9.66763	-2.91573	0.013668	0.0876338	-3.48716	CG3267
FBgn0044049	-0.289521	6.56991	-2.91631	0.0136536	0.0876338	-3.48612	Ilp4
FBgn0051169	-0.116861	7.73186	-2.91578	0.0136668	0.0876338	-3.48708	CG31169
FBgn0052564	0.213521	6.87018	2.91585	0.013665	0.0876338	-3.48695	CG32564
FBgn0033721	1.32952	9.03102	2.91536	0.0136773	0.0876484	-3.48783	CG13159
FBgn0028744	-0.169422	10.5529	-2.91506	0.0136846	0.0876506	-3.48835	CG5033
FBgn0031266	-0.150906	9.47715	-2.91417	0.0137067	0.087748	-3.48994	CG2807
FBgn0039073	-0.103606	9.48243	-2.91317	0.0137315	0.0878618	-3.49171	CG4408
FBgn0013810	-0.146587	7.07372	-2.9124	0.0137507	0.0878955	-3.49309	Dhc36C
FBgn0038146	-0.197412	9.30101	-2.91244	0.0137497	0.0878955	-3.49302	CG9799
FBgn0037248	-0.172231	10.1811	-2.912	0.0137607	0.0879154	-3.49381	Spargel
FBgn0029648	0.0975115	8.47245	2.91061	0.0137954	0.0880829	-3.49628	CG3603
FBgn0030610	-0.094691	10.0853	-2.91039	0.0138009	0.0880829	-3.49667	CG9065
FBgn0010651	0.194119	9.15267	2.90917	0.0138315	0.0882336	-3.49885	l(2)08717
FBgn0040340	0.127449	10.8538	2.90885	0.0138394	0.0882393	-3.49941	TRAM
FBgn0031275	0.083533	6.58714	2.90853	0.0138474	0.0882458	-3.49998	GABA-B-R3
FBgn0010808	-0.13004	10.4149	-2.9078	0.0138657	0.0883005	-3.50127	l(3)03670
FBgn0015925	-0.105445	9.77119	-2.90763	0.01387	0.0883005	-3.50158	csul
FBgn0034498	-0.124563	9.71005	-2.90733	0.0138775	0.0883037	-3.50211	CG16868
FBgn0040773	0.0858216	6.58734	2.90669	0.0138937	0.088362	-3.50325	CG2249
FBgn0000116	0.141516	12.3278	2.90543	0.0139256	0.088515	-3.50551	Argk
FBgn0031912	0.123052	11.7351	2.90518	0.0139317	0.088515	-3.50594	CG5261
FBgn0004598	-0.115224	10.9188	-2.90467	0.0139445	0.0885516	-3.50684	Fur2
FBgn0039739	-0.0907449	6.72365	-2.90226	0.0140056	0.088895	-3.51114	RpS28a
FBgn0031719	-0.200003	6.37287	-2.9012	0.0140327	0.0889324	-3.51303	CG18269
FBgn0033189	0.147784	12.0585	2.90122	0.014032	0.0889324	-3.51298	Cyt-b5
FBgn0011672	-0.0909573	9.80968	-2.90081	0.0140424	0.0889495	-3.51372	Mvl
FBgn0031937	0.215564	7.62617	2.89952	0.0140754	0.0891139	-3.51602	CG13795
FBgn0053307	-0.251647	8.22358	-2.89743	0.0141288	0.0894068	-3.51974	CG33307
[truncated: 10,401 more rows]

## Sheet: Lnk Gene Expression
ID	logFC	AveExpr	t	P.Value	adj.P.Val	B	symbol
FBgn0003996	2.26101	8.23789	53.7292	1.54168e-15	9.72647e-12	23.9737	w
FBgn0028717	-2.68297	7.70509	-54.2839	1.3654e-15	9.72647e-12	24.044	Lnk
FBgn0039801	1.89405	10.1677	43.3167	1.96311e-14	8.25683e-11	22.349	Npc2h
FBgn0014019	-1.41488	10.248	-41.9465	2.86823e-14	9.04783e-11	22.083	Rh5
FBgn0017561	-1.40246	8.60867	-33.7827	3.66835e-13	9.25746e-10	20.1473	Ork1
FBgn0044048	1.80462	11.2736	33.2505	4.4208e-13	9.29695e-10	19.9962	Ilp5
FBgn0039312	-1.29551	7.491	-28.2009	3.05167e-12	5.50085e-09	18.3655	CG10514
FBgn0036046	0.952149	11.0263	27.5709	3.97504e-12	5.57301e-09	18.1336	Ilp2
FBgn0037612	1.92242	8.6027	27.6455	3.85145e-12	5.57301e-09	18.1614	CG8112
FBgn0039239	-1.57157	8.39361	-26.4507	6.45556e-12	8.14563e-09	17.7034	CG13641
FBgn0003965	-1.01799	10.6166	-24.8725	1.32369e-11	1.42459e-08	17.0551	v
FBgn0031461	-0.930965	10.3228	-24.8229	1.35482e-11	1.42459e-08	17.0339	daw
FBgn0037635	-1.63933	8.73631	-24.2204	1.80409e-11	1.75108e-08	16.7717	CG9837
FBgn0039313	-0.996135	6.96017	-23.8542	2.15427e-11	1.94161e-08	16.6083	CG11892
FBgn0039609	-0.893076	6.98119	-23.4689	2.60378e-11	2.1903e-08	16.433	CG14529
FBgn0029147	-0.77086	9.6052	-23.0163	3.26565e-11	2.28922e-08	16.2224	NtR
FBgn0039073	-0.902754	9.35875	-23.0806	3.16147e-11	2.28922e-08	16.2526	CG4408
FBgn0039564	-1.03837	8.04451	-23.0858	3.15312e-11	2.28922e-08	16.2551	CG5527
FBgn0033446	0.666391	11.2509	22.5959	4.04583e-11	2.55472e-08	16.0222	CG1648
FBgn0051300	0.979804	8.65984	22.5942	4.04933e-11	2.55472e-08	16.0214	CG31300
FBgn0031971	0.685405	11.9475	22.3912	4.49691e-11	2.702e-08	15.9231	CG7224
FBgn0036975	-1.06057	11.3576	-21.7448	6.31755e-11	3.6234e-08	15.6027	CG5618
FBgn0261575	-4.50835	9.05897	-21.5152	7.14499e-11	3.75648e-08	15.4861	tobi
FBgn0044050	1.64334	10.5004	21.5446	7.03271e-11	3.75648e-08	15.5012	Ilp3
FBgn0011722	-1.07726	8.92523	-20.7894	1.06321e-10	5.36621e-08	15.1077	Tig
FBgn0035089	-1.04986	9.17717	-20.3197	1.38488e-10	6.72095e-08	14.8545	Phk-3
FBgn0037819	-0.706124	11.8165	-20.1842	1.49619e-10	6.99219e-08	14.7801	CG14688
FBgn0031261	-0.744257	8.91439	-20.033	1.63202e-10	7.35457e-08	14.6965	nAcRbeta-21C
FBgn0034276	-1.16095	8.31998	-19.8826	1.78036e-10	7.74641e-08	14.6126	CG6385
FBgn0002528	-0.758979	9.41882	-19.7314	1.94435e-10	7.91415e-08	14.5275	LanB2
FBgn0036022	1.32186	12.7359	19.7655	1.90605e-10	7.91415e-08	14.5467	CG8329
FBgn0031417	-0.670838	11.3522	-19.2587	2.57182e-10	1.0141e-07	14.2565	CG3597
FBgn0039323	-0.531872	7.11102	-19.1363	2.76779e-10	1.0583e-07	14.1852	CG10559
FBgn0035090	-0.639897	12.6261	-19.0364	2.93982e-10	1.07687e-07	14.1265	CG2736
FBgn0040502	0.866777	13.5241	19.0101	2.98703e-10	1.07687e-07	14.111	CG8343
FBgn0000139	-0.668643	9.64171	-18.4268	4.27537e-10	1.49852e-07	13.7609	ash2
FBgn0036619	0.666717	11.1958	18.3559	4.46897e-10	1.52404e-07	13.7175	Cpr72Ec
FBgn0026878	-0.689266	7.83419	-18.3119	4.59396e-10	1.52544e-07	13.6905	CG4325
FBgn0039022	-0.603462	9.15842	-17.9808	5.66514e-10	1.83289e-07	13.4847	CG4725
FBgn0011581	0.507438	11.8323	17.7084	6.74898e-10	2.12896e-07	13.3124	Dms
FBgn0033101	-0.533094	10.5873	-17.5824	7.32491e-10	2.25429e-07	13.2316	CG9436
FBgn0030157	-0.464318	12.1891	-17.2887	8.8837e-10	2.66892e-07	13.0409	CG1468
FBgn0026403	-1.18276	8.37905	-17.1424	9.79096e-10	2.87308e-07	12.9446	Ndg
FBgn0033602	-0.529072	9.28658	-16.9303	1.12889e-09	3.0966e-07	12.8034	Cpr47Ee
FBgn0039238	-0.701428	10.0429	-16.9729	1.09688e-09	3.0966e-07	12.8319	CG7016
FBgn0046878	-0.970219	8.5878	-16.9627	1.10448e-09	3.0966e-07	12.8251	Obp83cd
FBgn0039593	-0.759774	7.41337	-16.6718	1.3458e-09	3.61304e-07	12.6287	CG9989
FBgn0033065	-1.0165	11.8734	-16.5725	1.44068e-09	3.7872e-07	12.5609	Cyp6w1
FBgn0039800	0.680281	12.848	16.4525	1.56529e-09	4.03078e-07	12.4782	Npc2g
FBgn0034761	-0.454381	12.6028	-16.4028	1.62022e-09	4.08879e-07	12.4438	CG4250
FBgn0030270	-1.32364	8.83241	-16.3526	1.6778e-09	4.15108e-07	12.409	CG15199
FBgn0001114	-0.49448	12.5761	-16.2302	1.82782e-09	4.43527e-07	12.3235	Glt
FBgn0038652	-0.736424	8.75893	-16.0435	2.08522e-09	4.89995e-07	12.1918	CG7720
FBgn0039486	-0.687267	8.5432	-16.0355	2.09698e-09	4.89995e-07	12.1861	CG6074
FBgn0052523	1.5554	9.71089	15.9721	2.19381e-09	5.033e-07	12.141	CG32523
FBgn0038257	-0.990514	8.40356	-15.919	2.2785e-09	5.13395e-07	12.103	smp-30
FBgn0001257	-1.8541	9.78992	-15.7951	2.49006e-09	5.41717e-07	12.0141	ImpL2
FBgn0027578	-0.635949	10.583	-15.8084	2.46645e-09	5.41717e-07	12.0236	CG14526
FBgn0037779	-0.564011	10.3825	-15.7341	2.60204e-09	5.56484e-07	11.9699	CG12811
FBgn0031069	-0.548334	11.3551	-15.6746	2.71651e-09	5.66234e-07	11.9267	CG12703
FBgn0032699	0.593121	8.92624	15.6641	2.73738e-09	5.66234e-07	11.9191	CG10383
FBgn0037386	0.490891	8.41761	15.6331	2.79949e-09	5.69741e-07	11.8965	CG1208
FBgn0033067	1.54431	11.1026	15.5712	2.92855e-09	5.77382e-07	11.8513	CG11211
FBgn0033366	-0.603384	10.8658	-15.5879	2.89315e-09	5.77382e-07	11.8635	Ance-4
FBgn0031775	-0.851055	9.89546	-15.5218	3.03618e-09	5.80462e-07	11.815	CG9150
FBgn0034479	-0.519432	12.0075	-15.54	2.99601e-09	5.80462e-07	11.8284	CG8654
FBgn0033204	-0.835771	7.98433	-15.4326	3.24139e-09	5.92752e-07	11.7493	CG2065
FBgn0033913	0.570144	9.89427	15.4686	3.15675e-09	5.92752e-07	11.7759	CG8468
FBgn0085195	-1.29591	13.2577	-15.4492	3.20211e-09	5.92752e-07	11.7615	CG34166
FBgn0028543	-0.645197	11.5592	-15.4094	3.29722e-09	5.94348e-07	11.7321	nimB2
FBgn0044047	0.704709	9.47613	15.3119	3.54323e-09	6.29698e-07	11.6597	Ilp6
FBgn0000477	-0.744282	10.9538	-15.0685	4.24846e-09	7.2442e-07	11.4768	DNaseII
FBgn0031805	-0.909445	7.90389	-15.0846	4.1975e-09	7.2442e-07	11.489	CG9505
FBgn0039703	1.23045	9.5844	15.0841	4.19901e-09	7.2442e-07	11.4886	CG7829
FBgn0039232	0.538317	9.85107	14.9979	4.48031e-09	7.4385e-07	11.4232	CG13636
FBgn0243514	-0.544918	8.72496	-15.0148	4.42353e-09	7.4385e-07	11.4361	eater
FBgn0030773	1.15779	12.2619	14.8867	4.87389e-09	7.98685e-07	11.3382	CG9676
FBgn0031313	-0.48675	10.3756	-14.8179	5.13601e-09	8.30848e-07	11.2853	CG5080
FBgn0034394	-0.657283	12.6872	-14.7155	5.55426e-09	8.87135e-07	11.2062	CG15096
FBgn0033079	-0.588421	10.084	-14.6296	5.93408e-09	9.35952e-07	11.1392	Fmo-2
FBgn0031907	-0.470334	10.4583	-14.5912	6.11271e-09	9.52224e-07	11.1092	CG5171
FBgn0010651	-0.692805	9.53649	-14.4415	6.86666e-09	1.05663e-06	10.9914	l(2)08717
FBgn0031418	-0.990813	10.4427	-14.4181	6.9933e-09	1.06315e-06	10.9729	CG3609
FBgn0030398	0.837954	8.6342	14.3847	7.17832e-09	1.07829e-06	10.9464	Cpr11B
FBgn0036015	0.674437	13.46	14.3403	7.4329e-09	1.10339e-06	10.9111	CG3088
FBgn0051150	-0.445708	10.6948	-14.2903	7.73102e-09	1.1343e-06	10.8712	CG31150
FBgn0030558	0.426649	12.4653	14.2244	8.14424e-09	1.1812e-06	10.8184	CG1461
FBgn0002526	-0.507864	9.07794	-13.9015	1.05434e-08	1.49543e-06	10.556	LanA
FBgn0034390	-0.456012	9.13247	-13.901	1.05479e-08	1.49543e-06	10.5556	CG15093
FBgn0031913	-0.630711	11.8741	-13.8125	1.13317e-08	1.5294e-06	10.4826	CG5958
FBgn0034215	-0.521929	10.8742	-13.8474	1.10151e-08	1.5294e-06	10.5115	CG4802
FBgn0038463	-0.477179	9.25855	-13.808	1.13732e-08	1.5294e-06	10.4789	CG3534
FBgn0039298	-0.711096	11.6542	-13.8236	1.12301e-08	1.5294e-06	10.4918	to
FBgn0040717	-0.962712	8.71778	-13.8058	1.13936e-08	1.5294e-06	10.4771	Nplp4
FBgn0063494	-0.425434	10.0457	-13.7819	1.16174e-08	1.54303e-06	10.4573	GstE6
FBgn0003888	-0.478802	7.94841	-13.7382	1.20384e-08	1.56658e-06	10.421	betaTub60D
FBgn0037228	-0.423271	9.64137	-13.7377	1.2043e-08	1.56658e-06	10.4206	CG1092
FBgn0030334	-0.601736	8.28538	-13.6811	1.26135e-08	1.62405e-06	10.3735	Karl
FBgn0003137	-0.45078	11.2832	-13.5349	1.4227e-08	1.81329e-06	10.2507	Ppn
FBgn0034538	-0.736184	9.6623	-13.3698	1.63217e-08	2.04934e-06	10.1106	CG16799
FBgn0035076	-0.533741	10.1849	-13.3638	1.64038e-08	2.04934e-06	10.1054	Ance-5
FBgn0040211	0.94337	9.77461	13.3252	1.69434e-08	2.07565e-06	10.0724	hgo
FBgn0043783	-0.661383	11.8755	-13.3259	1.69323e-08	2.07565e-06	10.073	CG32444
FBgn0040832	-0.585571	9.57158	-13.2849	1.75256e-08	2.12633e-06	10.0379	CG8012
FBgn0030828	-0.665887	8.86334	-13.2719	1.77193e-08	2.12935e-06	10.0266	CG5162
FBgn0063493	-0.526646	9.36515	-13.1886	1.90097e-08	2.26288e-06	9.95478	GstE7
FBgn0040718	-1.07244	10.5265	-13.1522	1.96046e-08	2.31188e-06	9.92327	CG15353
FBgn0030258	0.414578	10.5448	13.1017	2.04657e-08	2.33736e-06	9.8793	CG1552
FBgn0032394	-0.452677	10.9354	-13.1205	2.01399e-08	2.33736e-06	9.89572	CG6746
FBgn0035964	-0.470411	10.9013	-13.115	2.02349e-08	2.33736e-06	9.8909	Dhpr
FBgn0051200	0.46558	10.7601	13.0962	2.05616e-08	2.33736e-06	9.87452	CG31200
FBgn0011705	-0.590356	11.2949	-13.0696	2.10318e-08	2.36946e-06	9.85138	rost
FBgn0034885	-0.480523	12.5743	-12.9975	2.23702e-08	2.49794e-06	9.78824	CG4019
FBgn0027584	-0.723636	10.422	-12.985	2.26116e-08	2.50274e-06	9.77725	CG4757
FBgn0034943	-0.560259	9.1059	-12.9705	2.28948e-08	2.51206e-06	9.7645	Fmo-1
FBgn0037387	0.465786	11.6689	12.9592	2.31179e-08	2.51467e-06	9.75458	CG1213
FBgn0027929	-0.572209	7.44326	-12.9322	2.36616e-08	2.55181e-06	9.73077	nimB1
FBgn0259238	-0.420801	9.24916	-12.8886	2.45687e-08	2.62718e-06	9.69223	CG42336
FBgn0019952	-0.475709	9.34153	-12.8161	2.61589e-08	2.77372e-06	9.62797	Orct
FBgn0027525	0.393018	12.052	12.7864	2.68449e-08	2.82274e-06	9.60143	CG7686
FBgn0051436	0.741071	9.21929	12.7283	2.82377e-08	2.94466e-06	9.54957	CG31436
FBgn0052647	-0.638587	11.0526	-12.6589	3.00071e-08	3.10352e-06	9.48723	CG32647
FBgn0050431	-0.468261	9.77417	-12.639	3.05353e-08	3.13248e-06	9.46932	CG30431
FBgn0036547	-0.529535	10.4089	-12.6148	3.11931e-08	3.15846e-06	9.44745	CG17032
FBgn0040600	0.530034	11.6772	12.6113	3.12893e-08	3.15846e-06	9.44429	CG13631
FBgn0032136	-0.550988	12.4301	-12.5751	3.23026e-08	3.23487e-06	9.41158	CG15828
FBgn0015569	-0.527892	8.7108	-12.5202	3.391e-08	3.32016e-06	9.36172	alpha-Est10
FBgn0020303	0.549171	11.9427	12.5191	3.39437e-08	3.32016e-06	9.3607	fok
FBgn0032773	-0.424077	13.1374	-12.523	3.38265e-08	3.32016e-06	9.36425	fon
FBgn0037818	-0.463377	8.8757	-12.4936	3.47201e-08	3.36999e-06	9.33747	CG6465
FBgn0063497	-0.456276	10.2188	-12.4529	3.59984e-08	3.46739e-06	9.30033	GstE3
FBgn0038519	-0.428412	11.1257	-12.4364	3.65294e-08	3.49188e-06	9.28529	Prx5037
FBgn0038353	-0.625983	7.24315	-12.359	3.91483e-08	3.71409e-06	9.21413	CG5399
FBgn0004903	0.43103	9.2019	12.3384	3.98766e-08	3.72714e-06	9.19518	Rb97D
FBgn0044011	-0.680231	7.76831	-12.339	3.98559e-08	3.72714e-06	9.19572	Spn43Ad
NA	-0.47043	11.2472	-12.3189	4.058e-08	3.76499e-06	9.17721	NA
FBgn0034468	-1.07856	10.0646	-12.298	4.1352e-08	3.80861e-06	9.15783	Obp56a
FBgn0037396	-0.5937	7.71787	-12.2535	4.30425e-08	3.93558e-06	9.11662	CG11459
FBgn0033949	-0.533326	8.73697	-12.2302	4.3958e-08	3.99037e-06	9.09497	CG10131
FBgn0054039	0.34844	9.1986	12.217	4.44857e-08	4.00943e-06	9.0827	CG34039
FBgn0036157	-0.511816	9.84954	-12.1815	4.59383e-08	4.11099e-06	9.04964	CG7560
FBgn0039321	-0.427707	11.8358	-12.1211	4.85342e-08	4.31271e-06	8.99306	CG10550
FBgn0035734	-0.405136	8.41612	-12.0854	5.01401e-08	4.42425e-06	8.95955	CG14823
FBgn0032299	0.510326	8.96909	12.0457	5.19964e-08	4.54662e-06	8.92211	CG17127
FBgn0261674	-0.408733	9.41931	-12.0404	5.22476e-08	4.54662e-06	8.91715	CG42709
FBgn0029765	-0.443402	11.4755	-12.032	5.26511e-08	4.55035e-06	8.90923	CG16756
FBgn0039381	0.423983	8.21388	11.9884	5.48033e-08	4.70414e-06	8.86796	CG17370
FBgn0037749	-0.521091	9.78748	-11.9707	5.57001e-08	4.74881e-06	8.85124	CG9471
FBgn0036992	0.84257	12.2368	11.9044	5.9219e-08	5.01493e-06	8.78811	CG11796
FBgn0046322	0.461595	7.35043	11.8248	6.37594e-08	5.36344e-06	8.71195	p38c
FBgn0038475	-0.415842	7.8443	-11.7918	6.57463e-08	5.49396e-06	8.6803	Keap1
FBgn0010611	-0.384448	10.0102	-11.7161	7.05722e-08	5.85842e-06	8.60723	Hmgs
FBgn0013348	0.614487	10.5479	11.6878	7.24713e-08	5.93794e-06	8.57983	TpnC41C
FBgn0038147	0.808668	11.0222	11.6899	7.23342e-08	5.93794e-06	8.58179	CG14375
FBgn0086704	-0.483013	9.29599	-11.6335	7.62795e-08	6.20964e-06	8.52697	stops
FBgn0030251	-0.385215	12.62	-11.6085	7.80981e-08	6.2767e-06	8.50265	CG2145
FBgn0083972	0.885977	9.27345	11.6121	7.78324e-08	6.2767e-06	8.50617	CG34136
FBgn0016013	0.573584	9.63016	11.5445	8.29863e-08	6.62735e-06	8.43996	Faa
FBgn0037607	-0.526182	11.8202	-11.5283	8.42724e-08	6.68773e-06	8.42407	CG8036
FBgn0050098	0.796777	8.83712	11.4866	8.76842e-08	6.915e-06	8.38308	CG30098
FBgn0000071	0.425991	6.82886	11.455	9.03738e-08	7.08283e-06	8.35186	Ama
FBgn0036116	0.429258	9.46569	11.4365	9.19877e-08	7.16482e-06	8.33357	CG7888
FBgn0037127	-0.388623	7.20559	-11.4226	9.32188e-08	7.21616e-06	8.31983	CG14566
FBgn0033904	-0.541528	8.20464	-11.381	9.70199e-08	7.41938e-06	8.27852	CG18327
FBgn0037899	0.435858	11.6223	11.3817	9.69473e-08	7.41938e-06	8.27929	RpL24-like
FBgn0052667	-0.680489	12.5602	-11.3625	9.87559e-08	7.50664e-06	8.26019	CG32667
FBgn0039094	-0.729007	7.79513	-11.3256	1.02334e-07	7.73202e-06	8.22339	CG10184
FBgn0030968	-0.587852	10.9233	-11.2371	1.11491e-07	8.3738e-06	8.13475	CG7322
FBgn0039674	-0.349382	10.5888	-11.224	1.12922e-07	8.43105e-06	8.12156	CG1907
FBgn0015541	-0.400844	9.6908	-11.2058	1.14946e-07	8.45297e-06	8.10317	sda
FBgn0033926	-0.57092	11.2878	-11.2085	1.14637e-07	8.45297e-06	8.10596	Arc1
FBgn0086676	-0.520382	11.5177	-11.2033	1.15225e-07	8.45297e-06	8.10067	spin
FBgn0017549	0.364549	11.1013	11.16	1.2019e-07	8.76621e-06	8.05701	Ric
FBgn0014032	-0.37428	9.39063	-11.0976	1.27774e-07	9.1496e-06	7.99368	Sptr
FBgn0032783	-0.50715	11.6788	-11.093	1.28347e-07	9.1496e-06	7.98904	CG10237
FBgn0039756	0.453329	9.14306	11.0983	1.27679e-07	9.1496e-06	7.99444	CG9743
FBgn0052486	0.404238	11.3066	11.0935	1.2829e-07	9.1496e-06	7.9895	CG32486
FBgn0028542	-0.471046	8.90565	-11.0046	1.40044e-07	9.9274e-06	7.89872	nimB4
FBgn0037896	-0.426808	9.67496	-10.9853	1.42741e-07	9.95085e-06	7.87897	ninaG
FBgn0037955	-0.329035	9.70783	-10.9931	1.41643e-07	9.95085e-06	7.88697	CG6950
FBgn0085282	-0.344624	10.2471	-10.9906	1.41995e-07	9.95085e-06	7.8844	CG34253
FBgn0031865	-0.855313	8.19719	-10.9112	1.53634e-07	1.06514e-05	7.80277	Nha1
FBgn0014469	-0.436395	12.4089	-10.8648	1.60923e-07	1.10355e-05	7.75474	Cyp4e2
FBgn0030332	-0.504592	12.0125	-10.8677	1.60454e-07	1.10355e-05	7.75776	CG9360
FBgn0000052	-0.561817	9.90132	-10.8447	1.64189e-07	1.11986e-05	7.73391	ade2
FBgn0040805	0.405751	9.24439	10.8328	1.66158e-07	1.1272e-05	7.72155	CG12355
FBgn0040735	-0.475252	12.4622	-10.7613	1.78525e-07	1.20462e-05	7.64712	CG16836
FBgn0032587	0.384073	8.33994	10.7527	1.80091e-07	1.20872e-05	7.63807	CG5953
FBgn0035557	-0.35673	6.79166	-10.7439	1.81702e-07	1.21308e-05	7.62883	CG11353
FBgn0023535	-0.626784	7.95552	-10.733	1.83712e-07	1.22004e-05	7.61742	arg
FBgn0031245	-0.327386	11.8599	-10.7142	1.87221e-07	1.23104e-05	7.59779	CG3625
FBgn0036857	-0.576958	9.92229	-10.7137	1.87319e-07	1.23104e-05	7.59725	CG9629
FBgn0035904	-0.346542	11.1871	-10.6974	1.90434e-07	1.24502e-05	7.58014	CG6776
FBgn0030158	0.406092	11.942	10.6642	1.96962e-07	1.28107e-05	7.54518	CG9686
FBgn0037936	-0.539477	10.7429	-10.6203	2.05956e-07	1.3259e-05	7.49885	CG6908
FBgn0020372	0.359973	11.3006	10.6008	2.10079e-07	1.34557e-05	7.47828	TM4SF
FBgn0037973	-0.696971	8.655	-10.5952	2.11289e-07	1.34649e-05	7.47232	CG18547
FBgn0010053	-0.547527	11.4186	-10.5431	2.22854e-07	1.41305e-05	7.41701	Jheh1
FBgn0027601	0.308534	10.6583	10.532	2.25396e-07	1.42202e-05	7.40523	CG9009
FBgn0019932	-0.394252	9.87352	-10.5229	2.27502e-07	1.42817e-05	7.39558	SamDC
FBgn0030362	-0.63632	11.6072	-10.49	2.35325e-07	1.46997e-05	7.36048	regucalcin
FBgn0032801	-0.394906	8.79926	-10.4794	2.37923e-07	1.47887e-05	7.34908	CG10165
FBgn0036597	0.708106	7.66839	10.4587	2.43051e-07	1.50334e-05	7.32693	CG4962
FBgn0039207	-0.320037	8.43284	-10.4349	2.49108e-07	1.53329e-05	7.30137	CG5789
FBgn0034756	-0.395071	8.61078	-10.4104	2.55485e-07	1.5649e-05	7.27512	Cyp6d2
FBgn0035169	-0.581402	9.41978	-10.3906	2.6078e-07	1.58962e-05	7.25381	CG13890
FBgn0031717	-0.39146	9.10891	-10.3301	2.77699e-07	1.68462e-05	7.1885	Oscillin
FBgn0000565	-1.02906	10.4108	-10.2818	2.92078e-07	1.76337e-05	7.13604	Eip71CD
FBgn0003093	0.54473	9.67198	10.2749	2.94199e-07	1.76736e-05	7.12852	Pkc98E
FBgn0027791	-0.367225	8.02255	-10.2705	2.9554e-07	1.76736e-05	7.12379	O-fut2
FBgn0015834	0.334525	12.2196	10.251	3.01651e-07	1.79539e-05	7.10252	Trip1
FBgn0032116	-0.404228	7.25755	-10.2458	3.03299e-07	1.79672e-05	7.09686	CG3759
FBgn0259977	-0.558063	8.9344	-10.2127	3.14037e-07	1.85164e-05	7.06069	Tdc1
FBgn0039102	-0.553761	11.3663	-10.1762	3.26324e-07	1.91514e-05	7.02079	SPE
FBgn0036359	0.52419	10.0083	10.1338	3.41294e-07	1.99373e-05	6.97414	CG14105
FBgn0033129	-0.394339	8.52984	-10.1063	3.51374e-07	2.04315e-05	6.94387	Tsp42Eh
FBgn0000024	0.441511	9.65516	10.102	3.53003e-07	2.04321e-05	6.93906	Ace
FBgn0002778	0.400935	9.09231	10.0829	3.60213e-07	2.06599e-05	6.91803	mnd
FBgn0037697	0.556683	8.66685	10.0849	3.59463e-07	2.06599e-05	6.9202	CG9363
FBgn0069973	0.308088	9.90551	10.0729	3.64054e-07	2.07857e-05	6.907	CG40485
FBgn0030274	0.285245	9.18373	10.0506	3.7283e-07	2.10017e-05	6.88222	CG1908
FBgn0034628	-0.397975	9.52857	-10.0532	3.7179e-07	2.10017e-05	6.88512	Acox57D-p
FBgn0038897	-0.351469	7.71233	-10.0557	3.7079e-07	2.10017e-05	6.88793	CG5849
FBgn0039315	-0.37123	6.68015	-10.0431	3.75823e-07	2.10762e-05	6.8739	CG13658
FBgn0039613	-0.344564	7.13532	-10.0089	3.89765e-07	2.17613e-05	6.836	CG14527
FBgn0031925	-0.470852	7.26399	-9.99458	3.95799e-07	2.20008e-05	6.82002	Cyp4d21
FBgn0032904	-0.368809	10.5878	-9.98083	4.01669e-07	2.21754e-05	6.8047	Mtp
FBgn0053307	-0.3492	10.4091	-9.97901	4.02453e-07	2.21754e-05	6.80267	CG33307
FBgn0040102	-0.397009	9.79583	-9.96926	4.06682e-07	2.23109e-05	6.79179	lectin-24Db
FBgn0039495	-0.578663	8.26943	-9.91762	4.29885e-07	2.34818e-05	6.73404	CG5909
FBgn0033644	0.35582	7.49368	9.88497	4.4529e-07	2.42184e-05	6.69739	Tret1-2
FBgn0063495	-0.34133	7.66467	-9.80793	4.84041e-07	2.6213e-05	6.61051	GstE5
FBgn0039537	0.310422	10.9289	9.783	4.97346e-07	2.68184e-05	6.58227	CG5590
FBgn0035189	-0.74803	9.42013	-9.7761	5.01098e-07	2.69058e-05	6.57444	CG9119
FBgn0040398	-0.297189	12.9066	-9.76779	5.05654e-07	2.70354e-05	6.56502	CG14629
FBgn0035484	-0.543204	9.94185	-9.7603	5.09804e-07	2.71422e-05	6.5565	CG11594
FBgn0034497	0.356425	10.7234	9.74735	5.17057e-07	2.7298e-05	6.54179	CG9090
FBgn0039024	-0.350794	11.1585	-9.75113	5.14927e-07	2.7298e-05	6.54609	CG4721
FBgn0051414	-0.515555	8.17184	-9.72676	5.28825e-07	2.77933e-05	6.51835	CG31414
FBgn0053481	0.31391	10.4593	9.72328	5.30843e-07	2.77933e-05	6.51438	dpr7
FBgn0028400	0.300108	11.3072	9.70961	5.38846e-07	2.79801e-05	6.49879	Syt4
FBgn0037225	-0.389831	7.61921	-9.71094	5.38059e-07	2.79801e-05	6.50032	TwdlG
FBgn0036428	0.775614	11.6173	9.69222	5.49216e-07	2.84017e-05	6.47893	CG9238
FBgn0035355	-0.363199	9.29121	-9.68059	5.56268e-07	2.85916e-05	6.46564	CG16985
FBgn0036433	0.34966	11.7482	9.67501	5.59687e-07	2.85916e-05	6.45926	CG9628
FBgn0039464	-0.469193	10.2314	-9.67753	5.58141e-07	2.85916e-05	6.46214	CG6330
FBgn0010225	-0.334247	12.8072	-9.65638	5.7127e-07	2.90656e-05	6.43792	Gel
FBgn0005672	0.299811	10.3304	9.60961	6.0149e-07	3.04803e-05	6.3842	spi
FBgn0000422	0.37787	9.56799	9.56261	6.3359e-07	3.19786e-05	6.33001	Ddc
FBgn0031362	-0.542509	11.0348	-9.55859	6.36421e-07	3.19935e-05	6.32537	CG17646
FBgn0261859	0.728139	9.15509	9.55144	6.41488e-07	3.21202e-05	6.3171	CG42788
FBgn0024957	-0.37333	10.7543	-9.542	6.48247e-07	3.23303e-05	6.30618	Irp-1B
FBgn0028646	-0.367418	9.98814	-9.52629	6.5966e-07	3.277e-05	6.28798	aralar1
FBgn0032507	-0.850648	10.2122	-9.50461	6.75769e-07	3.34386e-05	6.26283	CG9377
FBgn0026576	-0.429668	11.8023	-9.47675	6.97097e-07	3.43593e-05	6.23043	CG5991
FBgn0039145	-0.268251	8.61173	-9.45597	7.13476e-07	3.50297e-05	6.20622	CG6000
FBgn0039294	-0.284888	6.60927	-9.45224	7.16454e-07	3.50396e-05	6.20188	Cad96Cb
FBgn0020762	0.27575	9.40774	9.43377	7.31425e-07	3.54966e-05	6.18031	Atet
FBgn0040524	-0.323185	6.92867	-9.43405	7.31193e-07	3.54966e-05	6.18064	CG11052
FBgn0026702	0.295616	8.06259	9.41033	7.5091e-07	3.63026e-05	6.15289	l(1)G0045
FBgn0039065	0.405574	8.17752	9.39979	7.59852e-07	3.65947e-05	6.14055	CG4449
FBgn0051207	0.298345	9.43827	9.38452	7.73008e-07	3.70867e-05	6.12265	CG31207
FBgn0001263	0.303983	11.8643	9.36731	7.8813e-07	3.7669e-05	6.10244	inaD
FBgn0039359	0.378061	13.8353	9.35418	7.99883e-07	3.80865e-05	6.087	RpL27
FBgn0016075	-0.329095	10.3228	-9.34721	8.06198e-07	3.82429e-05	6.0788	vkg
FBgn0025641	0.322741	10.0421	9.32739	8.24454e-07	3.86111e-05	6.05544	DAAM
FBgn0036364	0.348989	10.0082	9.33304	8.19207e-07	3.86111e-05	6.0621	CG14109
FBgn0039023	-0.41677	9.21375	-9.32551	8.26201e-07	3.86111e-05	6.05323	CG4723
FBgn0051205	0.465655	11.4963	9.32789	8.23983e-07	3.86111e-05	6.05604	CG31205
FBgn0030993	-0.345085	7.85716	-9.31519	8.35905e-07	3.89205e-05	6.04105	Mec2
FBgn0000536	-0.37904	10.8339	-9.29877	8.51593e-07	3.95051e-05	6.02165	eas
FBgn0015781	-0.400979	9.64407	-9.29309	8.57089e-07	3.96145e-05	6.01494	P5cr
FBgn0020637	-0.529519	7.88894	-9.28668	8.63349e-07	3.97464e-05	6.00735	Lcp65Ag2
FBgn0039291	-0.378443	7.803	-9.28373	8.66242e-07	3.97464e-05	6.00386	CG13663
FBgn0041182	-0.402332	11.6491	-9.27115	8.78701e-07	4.01719e-05	5.98896	TepII
FBgn0036053	0.292463	10.2201	9.2632	8.8667e-07	4.03512e-05	5.97954	iPLA2-VIA
FBgn0039485	0.528734	8.73036	9.26087	8.89019e-07	4.03512e-05	5.97678	CG17189
FBgn0086370	0.357061	10.4257	9.25165	8.98391e-07	4.06305e-05	5.96584	sra
FBgn0039883	0.395544	9.76689	9.24553	9.04666e-07	4.07681e-05	5.95857	RhoGAP100F
FBgn0031474	0.256498	10.0153	9.2352	9.15375e-07	4.11039e-05	5.94629	CG2991
FBgn0031700	0.37393	8.34154	9.22876	9.22116e-07	4.12598e-05	5.93864	CG14022
FBgn0028418	0.378495	7.7689	9.17909	9.75941e-07	4.35139e-05	5.87943	Leucokinin
FBgn0004507	0.275125	11.7129	9.15273	1.00586e-06	4.46901e-05	5.84791	GlyP
FBgn0037723	-0.354155	8.66185	-9.14485	1.015e-06	4.4938e-05	5.83847	SpdS
FBgn0039754	-0.705044	10.1051	-9.13599	1.02539e-06	4.5239e-05	5.82785	CG9747
FBgn0086904	0.273317	13.1053	9.09486	1.07508e-06	4.7266e-05	5.77845	Nacalpha
FBgn0031146	0.649019	7.74498	9.06356	1.11463e-06	4.88348e-05	5.74073	CG15449
FBgn0002772	0.367537	12.1651	9.05675	1.12345e-06	4.90507e-05	5.7325	Mlc1
FBgn0030348	0.335465	8.1477	9.04495	1.13889e-06	4.92498e-05	5.71825	CG10352
FBgn0031936	-0.326314	10.0786	-9.04036	1.14495e-06	4.92498e-05	5.71271	CG13794
FBgn0032138	0.292882	11.54	9.04777	1.13517e-06	4.92498e-05	5.72166	CG4364
FBgn0262350	0.269073	10.3881	9.03823	1.14777e-06	4.92498e-05	5.71014	bru-3
FBgn0036995	-0.374728	7.30263	-9.03549	1.15143e-06	4.92498e-05	5.70682	CG5195
FBgn0038803	-0.386376	11.1667	-9.04048	1.14479e-06	4.92498e-05	5.71286	CG5191
FBgn0004880	0.294211	9.58564	9.02882	1.16036e-06	4.92979e-05	5.69874	scrt
FBgn0261574	0.298501	9.47218	9.0294	1.15958e-06	4.92979e-05	5.69945	kug
FBgn0039666	0.474386	7.79979	9.01485	1.17932e-06	4.9935e-05	5.68183	CG11501
FBgn0034605	-0.353988	10.0649	-8.99859	1.2018e-06	5.07167e-05	5.66211	CG15661
FBgn0035039	-0.277626	8.53638	-8.98889	1.21543e-06	5.11209e-05	5.65033	CG3608
FBgn0036417	0.354988	7.75788	8.9614	1.25497e-06	5.26086e-05	5.6169	CG7906
FBgn0039266	0.267096	10.6491	8.93541	1.29362e-06	5.40493e-05	5.58522	CG11791
FBgn0003076	-0.287473	12.1864	-8.91542	1.32422e-06	5.5145e-05	5.5608	Pgm
FBgn0003250	-0.3174	13.8344	-8.84875	1.432e-06	5.94373e-05	5.47906	Rh4
FBgn0038299	-0.364558	9.8051	-8.84258	1.44244e-06	5.96743e-05	5.47147	Spn88Eb
FBgn0035245	0.256458	8.48107	8.81331	1.4931e-06	6.15683e-05	5.43541	GC
FBgn0025682	-0.270066	10.2156	-8.8105	1.49806e-06	6.15717e-05	5.43194	scf
FBgn0002565	-0.649876	9.97851	-8.79515	1.52548e-06	6.22154e-05	5.41299	Lsp2
FBgn0037270	0.281339	11.7156	8.79611	1.52375e-06	6.22154e-05	5.41418	CG9769
FBgn0051777	-0.435899	11.8508	-8.79347	1.52851e-06	6.22154e-05	5.41091	CG31777
FBgn0038347	-0.441182	10.1701	-8.78655	1.54108e-06	6.25252e-05	5.40236	CG18522
FBgn0029896	0.389708	11.0422	8.78212	1.54919e-06	6.26527e-05	5.39688	CG3168
FBgn0036680	-0.380941	8.85552	-8.7734	1.56526e-06	6.31006e-05	5.38609	Cpr73D
FBgn0040465	0.284496	8.38439	8.7696	1.57232e-06	6.31833e-05	5.38139	Dip3
FBgn0035452	-0.400994	7.20721	-8.75566	1.59854e-06	6.40328e-05	5.36411	CG10359
FBgn0033367	-0.492872	11.2602	-8.74057	1.62743e-06	6.43735e-05	5.34539	CG8193
FBgn0035147	-0.421166	10.847	-8.74056	1.62745e-06	6.43735e-05	5.34538	CG12030
FBgn0038662	-0.340705	11.404	-8.74101	1.62658e-06	6.43735e-05	5.34594	CG14290
FBgn0053120	-0.29899	10.6887	-8.74792	1.6133e-06	6.43735e-05	5.35451	CG33120
FBgn0028936	-0.393811	8.74624	-8.71688	1.67394e-06	6.55955e-05	5.31594	nimB5
FBgn0031559	-0.726092	8.69629	-8.7193	1.66912e-06	6.55955e-05	5.31896	CG3513
FBgn0050050	0.40716	7.86998	8.72044	1.66686e-06	6.55955e-05	5.32037	CG30050
FBgn0028401	0.444868	9.36092	8.70825	1.69123e-06	6.60678e-05	5.30521	Snap24
FBgn0260474	0.406369	8.74153	8.69159	1.72516e-06	6.71855e-05	5.28444	CG30002
FBgn0033439	0.406369	8.74153	8.69159	1.72516e-06	6.71855e-05	5.28444	CG1773
FBgn0038525	0.282585	8.91734	8.67474	1.76022e-06	6.83397e-05	5.26342	CG14329
FBgn0026077	0.430249	9.49094	8.67133	1.7674e-06	6.84082e-05	5.25916	Gasp
FBgn0010470	-0.324495	10.6556	-8.63687	1.84184e-06	7.1068e-05	5.21604	Fkbp13
FBgn0036145	0.28477	10.9467	8.63436	1.84738e-06	7.1068e-05	5.2129	CG7607
FBgn0033215	-0.807756	7.42106	-8.61286	1.89567e-06	7.27038e-05	5.18593	CG1942
FBgn0039114	0.286787	13.1668	8.60633	1.91061e-06	7.28339e-05	5.17772	Lsd-1
FBgn0052425	-0.263524	9.75644	-8.60735	1.90827e-06	7.28339e-05	5.179	CG32425
FBgn0004638	-0.2683	9.6997	-8.60263	1.91913e-06	7.29384e-05	5.17307	drk
FBgn0046763	-0.493069	10.0775	-8.59738	1.93129e-06	7.31801e-05	5.16647	CG17278
FBgn0034165	0.301983	9.35499	8.59456	1.93785e-06	7.32089e-05	5.16292	CG6435
FBgn0032264	0.420296	8.52659	8.58411	1.96236e-06	7.39138e-05	5.14978	Lip4
FBgn0027111	0.320034	10.6884	8.57943	1.97347e-06	7.41109e-05	5.14388	miple
FBgn0051103	0.384043	9.18811	8.5635	2.01173e-06	7.53234e-05	5.12381	CG31103
FBgn0024740	-0.49499	7.81475	-8.54557	2.05576e-06	7.67445e-05	5.10117	Lip2
FBgn0004396	-0.410799	8.56925	-8.53431	2.08394e-06	7.75668e-05	5.08694	CrebA
FBgn0039259	0.273823	8.81932	8.52935	2.09647e-06	7.78038e-05	5.08067	CG11781
FBgn0028473	0.370719	12.3165	8.5148	2.13373e-06	7.87235e-05	5.06225	CG8801
FBgn0038302	-0.353474	8.48554	-8.51141	2.14251e-06	7.8817e-05	5.05795	CG4210
FBgn0023214	-0.46654	8.56198	-8.50086	2.1701e-06	7.95999e-05	5.04458	edl
FBgn0036208	-0.446424	9.82773	-8.49249	2.19226e-06	8.01795e-05	5.03395	CG10361
FBgn0038412	-0.242839	7.86487	-8.48484	2.21273e-06	8.06941e-05	5.02424	Zip3
FBgn0038957	0.361707	8.02033	8.44519	2.32208e-06	8.44382e-05	4.97379	CG7059
FBgn0029720	0.240661	8.8495	8.43205	2.35961e-06	8.53817e-05	4.95703	CG3009
FBgn0031460	-0.345713	9.49539	-8.43137	2.36156e-06	8.53817e-05	4.95616	CG15399
FBgn0031845	-0.26437	11.0714	-8.42255	2.38711e-06	8.60589e-05	4.94491	CG9232
FBgn0004118	0.268251	8.51889	8.41833	2.39945e-06	8.62573e-05	4.93952	nAcRbeta-96A
FBgn0030593	0.320229	11.7672	8.41287	2.41552e-06	8.65877e-05	4.93254	CG9512
FBgn0051380	-0.413804	6.8746	-8.41055	2.42237e-06	8.65877e-05	4.92957	CG31380
FBgn0038946	0.405905	11.5886	8.40271	2.44571e-06	8.71751e-05	4.91955	CG7077
FBgn0032285	-0.233739	14.2776	-8.40027	2.45304e-06	8.71901e-05	4.91642	CG17108
FBgn0026585	-0.337737	9.05583	-8.37087	2.543e-06	9.01337e-05	4.87875	Ent2
FBgn0000575	0.384891	11.5036	8.36249	2.5693e-06	9.05909e-05	4.86799	emc
FBgn0014033	-0.318785	9.00644	-8.36219	2.57026e-06	9.05909e-05	4.86759	Sr-CI
FBgn0028961	0.257325	8.20431	8.35305	2.59927e-06	9.13128e-05	4.85586	AlstR
FBgn0030706	0.304663	9.74904	8.35119	2.60522e-06	9.13128e-05	4.85347	CG8909
FBgn0030310	-0.301634	9.931	-8.34708	2.61842e-06	9.15215e-05	4.84818	PGRP-SA
FBgn0024289	-0.708577	11.3783	-8.33885	2.64504e-06	9.21965e-05	4.8376	Sodh-1
FBgn0039356	0.34197	7.4452	8.32035	2.706e-06	9.38426e-05	4.81376	CG5039
FBgn0051706	0.299906	10.8753	8.32001	2.70714e-06	9.38426e-05	4.81332	CG31706
FBgn0039890	0.271236	10.1534	8.31534	2.72276e-06	9.41254e-05	4.80731	CG2316
FBgn0030245	-0.262005	9.15205	-8.31126	2.73647e-06	9.42989e-05	4.80205	CG1637
FBgn0034720	0.287509	10.4184	8.30941	2.74272e-06	9.42989e-05	4.79966	CG11206
FBgn0051445	-0.378978	10.088	-8.30168	2.76901e-06	9.49439e-05	4.78969	CG31445
FBgn0261794	0.247331	11.6456	8.2956	2.7899e-06	9.54009e-05	4.78182	kcc
FBgn0015546	0.274009	7.52009	8.28336	2.83241e-06	9.55599e-05	4.766	spel1
FBgn0025720	-0.274453	9.52454	-8.28792	2.81649e-06	9.55599e-05	4.7719	Ate1
FBgn0036262	-0.507023	11.4257	-8.28578	2.82396e-06	9.55599e-05	4.76913	CG6910
FBgn0037090	-0.581608	10.1414	-8.28404	2.83004e-06	9.55599e-05	4.76688	Est-Q
FBgn0051451	0.704392	11.8718	8.28472	2.82765e-06	9.55599e-05	4.76776	CG31451
FBgn0030484	0.375818	9.59021	8.27809	2.85091e-06	9.59274e-05	4.75919	CG1681
FBgn0035544	-0.290587	9.49388	-8.26861	2.88458e-06	9.68022e-05	4.74691	CG15021
FBgn0035321	0.224014	10.5927	8.26327	2.90371e-06	9.71856e-05	4.74	CG1275
FBgn0013770	-0.28198	13.1686	-8.25977	2.91633e-06	9.71987e-05	4.73546	Cp1
FBgn0020907	0.280311	11.7318	8.25889	2.91951e-06	9.71987e-05	4.73432	Scp2
FBgn0033313	0.225922	9.50022	8.25485	2.93414e-06	9.74289e-05	4.72909	Cirl
FBgn0052726	0.370318	10.4256	8.23358	3.01261e-06	9.97719e-05	4.70148	CG32726
FBgn0002563	-1.68337	11.2237	-8.22888	3.03024e-06	0.000100093	4.69537	Lsp1beta
FBgn0036587	-0.527698	9.68769	-8.20905	3.1059e-06	0.000102324	4.66957	CG4950
FBgn0058298	0.344559	8.98196	8.20086	3.13773e-06	0.000103104	4.6589	CG40298
FBgn0040099	0.533251	9.11408	8.19218	3.17182e-06	0.000103802	4.6476	lectin-28C
FBgn0051992	0.250144	11.4158	8.19127	3.17542e-06	0.000103802	4.64641	gw
FBgn0029828	0.379964	11.177	8.18311	3.2079e-06	0.000104592	4.63576	CG6067
FBgn0039154	-0.442807	6.95096	-8.17967	3.22168e-06	0.000104771	4.63128	Npc2f
FBgn0031881	-0.409949	8.71433	-8.17519	3.23974e-06	0.000105088	4.62543	CG3476
FBgn0039908	0.247937	10.4195	8.16744	3.27128e-06	0.000105838	4.61529	Asator
FBgn0030482	-0.628002	9.25115	-8.16069	3.29896e-06	0.000106461	4.60648	CG1673
FBgn0036348	-0.252959	7.12294	-8.14067	3.38262e-06	0.000108882	4.58027	CG17687
FBgn0032752	0.451327	8.22068	8.13419	3.41018e-06	0.00010949	4.57178	CG10702
FBgn0037715	-0.303954	11.7454	-8.13131	3.42252e-06	0.000109607	4.568	CG9399
FBgn0001105	0.264075	11.0773	8.12821	3.43582e-06	0.000109755	4.56394	Gbeta13F
FBgn0025582	0.237805	11.5381	8.1194	3.474e-06	0.000110138	4.55238	Int6
FBgn0031771	0.224872	12.0329	8.12269	3.45971e-06	0.000110138	4.55669	CG9140
FBgn0051098	-0.313571	8.38161	-8.12119	3.4662e-06	0.000110138	4.55473	CG31098
FBgn0031974	-0.243372	9.16614	-8.11611	3.48836e-06	0.00011025	4.54806	CG12560
FBgn0035583	0.479931	9.78757	8.11261	3.50373e-06	0.00011025	4.54346	CG13704
FBgn0051664	-0.49937	9.37365	-8.11451	3.4954e-06	0.00011025	4.54595	CG31664
FBgn0031995	0.231001	9.95386	8.0975	3.57087e-06	0.000111805	4.5236	CG8475
FBgn0040653	-0.313695	12.4917	-8.09921	3.5632e-06	0.000111805	4.52585	IM4
FBgn0027073	-0.314265	9.66774	-8.08878	3.61021e-06	0.000112757	4.51213	CG4302
FBgn0032601	-0.329537	8.7423	-8.08201	3.6411e-06	0.000113441	4.50322	yellow-b
FBgn0000043	-0.28687	8.66357	-8.06619	3.71438e-06	0.000115438	4.48237	Act42A
FBgn0001197	0.257164	10.3909	8.05216	3.78066e-06	0.00011721	4.46386	His2Av
FBgn0025885	-0.283534	12.3265	-8.03313	3.87265e-06	0.000119767	4.4387	Inos
FBgn0028497	0.322123	10.4661	8.02603	3.90756e-06	0.000120552	4.4293	CG3530
FBgn0032864	-0.250627	10.5048	-7.9929	4.07505e-06	0.000125304	4.38538	CG2493
FBgn0038279	0.284114	8.64632	7.99166	4.08146e-06	0.000125304	4.38373	CG3837
FBgn0003261	0.328248	11.4891	7.97586	4.16414e-06	0.000127223	4.36274	Rm62
FBgn0027598	0.260906	8.25325	7.97664	4.16002e-06	0.000127223	4.36378	cindr
FBgn0051721	0.244411	7.28283	7.97178	4.18581e-06	0.000127576	4.35731	Trim9
FBgn0040349	-1.25858	9.39683	-7.95847	4.25722e-06	0.000129253	4.33961	CG3699
FBgn0259823	0.272415	9.5822	7.95772	4.26131e-06	0.000129253	4.3386	CG42404
FBgn0031560	-0.279898	10.942	-7.94721	4.3187e-06	0.000130367	4.3246	CG16713
FBgn0033830	0.365871	7.40826	7.94802	4.31427e-06	0.000130367	4.32567	CG10814
FBgn0039905	0.288661	8.99791	7.94449	4.33369e-06	0.000130507	4.32097	Lin29
FBgn0030798	0.283567	8.5759	7.93947	4.36151e-06	0.000130721	4.31427	CG13003
FBgn0031937	-0.309218	9.9834	-7.94038	4.35645e-06	0.000130721	4.31549	CG13795
FBgn0027930	-0.230198	10.3965	-7.93399	4.39211e-06	0.000131326	4.30695	MP1
FBgn0001186	0.334594	9.80764	7.93168	4.40507e-06	0.000131342	4.30387	Hex-A
FBgn0003447	0.370733	10.9058	7.92734	4.42953e-06	0.000131342	4.29807	sn
FBgn0027296	0.260396	10.5426	7.92649	4.43428e-06	0.000131342	4.29695	l(1)G0144
FBgn0038211	-0.284272	9.62769	-7.93003	4.41433e-06	0.000131342	4.30167	CG9649
FBgn0027562	-0.465279	9.52927	-7.91246	4.51444e-06	0.000133403	4.2782	CG10345
FBgn0033777	-0.289242	10.4764	-7.90435	4.56152e-06	0.000133543	4.26734	CG17574
FBgn0036560	0.302644	10.2017	7.90673	4.54762e-06	0.000133543	4.27053	CG5895
FBgn0039208	0.286075	10.579	7.9055	4.55478e-06	0.000133543	4.26889	Esyt2
FBgn0050035	0.336966	12.2417	7.9047	4.55949e-06	0.000133543	4.26781	Tret1-1
FBgn0003475	0.25355	9.2467	7.89918	4.59176e-06	0.000134118	4.26042	spir
FBgn0261393	-0.458233	8.85924	-7.88784	4.6589e-06	0.000135764	4.24523	alpha-Est5
FBgn0003430	0.288587	7.69256	7.88236	4.69173e-06	0.000136406	4.23788	slp1
FBgn0000054	0.281742	9.99577	7.86869	4.77465e-06	0.000138498	4.21954	Adf1
FBgn0038983	0.392948	8.89414	7.85181	4.87925e-06	0.000141207	4.19685	CG5326
FBgn0033658	-0.343294	7.18721	-7.846	4.91582e-06	0.00014194	4.18904	TwdlBeta
FBgn0027492	-0.240797	6.93147	-7.83133	5.00942e-06	0.000144313	4.16929	wdb
FBgn0039527	0.304951	7.35784	7.81294	5.12949e-06	0.000147435	4.14449	CG5639
FBgn0011260	-0.245979	9.35578	-7.80544	5.17934e-06	0.000148529	4.13437	Sema-2a
FBgn0004028	0.2913	12.5272	7.79123	5.27521e-06	0.000150254	4.11517	wupA
FBgn0085833	0.358568	8.80366	7.79156	5.27298e-06	0.000150254	4.11561	CR42206
FBgn0250835	-0.307603	8.51168	-7.79169	5.27209e-06	0.000150254	4.11579	CG15394
FBgn0039540	-0.336571	7.57844	-7.78669	5.30627e-06	0.000150798	4.10902	CG12879
FBgn0001280	-0.236173	10.2545	-7.7822	5.33717e-06	0.000151336	4.10294	janA
FBgn0032643	-0.26259	8.71667	-7.77926	5.35749e-06	0.000151571	4.09897	CG6453
FBgn0259878	0.270548	7.70671	7.7669	5.44383e-06	0.00015367	4.08223	Fs
FBgn0032940	0.219383	10.3907	7.74774	5.58062e-06	0.000157179	4.05625	Mio
FBgn0003116	-0.382378	8.84771	-7.73007	5.71006e-06	0.000160467	4.03224	pn
FBgn0039328	0.264743	8.33263	7.71179	5.84739e-06	0.000163597	4.00736	CHKov2
FBgn0035903	0.33285	8.11328	7.70608	5.89097e-06	0.000164452	3.99958	CG6765
FBgn0035679	-0.320401	9.14815	-7.69523	5.97483e-06	0.000166425	3.98478	CG10467
FBgn0032834	-0.370507	8.04187	-7.67586	6.12769e-06	0.000170307	3.95833	CG13965
FBgn0020642	-0.266755	7.57265	-7.66891	6.1835e-06	0.00017148	3.94884	Lcp65Ac
FBgn0039172	-0.343393	7.25368	-7.66346	6.22769e-06	0.000172327	3.94139	Spase22-23
FBgn0036821	-0.277791	11.447	-7.65722	6.27866e-06	0.000173357	3.93285	CG3961
FBgn0034724	-0.303422	10.2189	-7.65353	6.30905e-06	0.000173816	3.92779	CG3624
FBgn0039904	0.275043	7.47538	7.64297	6.39683e-06	0.00017585	3.91333	Hcf
FBgn0033015	0.239423	9.61348	7.63152	6.49349e-06	0.000178119	3.89762	d4
FBgn0051555	0.291561	9.18852	7.62095	6.58412e-06	0.000180214	3.88311	CG31555
FBgn0032387	-0.398384	8.89175	-7.61475	6.63785e-06	0.000180914	3.8746	CG16965
FBgn0033196	0.256606	10.1159	7.61469	6.63838e-06	0.000180914	3.87452	CG1358
FBgn0014417	-0.362526	8.35989	-7.60941	6.68452e-06	0.000181317	3.86726	CG13397
FBgn0262167	0.234993	7.44702	7.61007	6.67872e-06	0.000181317	3.86817	ana1
FBgn0062928	-0.340918	7.56338	-7.60807	6.6963e-06	0.000181317	3.86542	pncr009:3L
FBgn0029167	-0.297776	9.84245	-7.60581	6.7162e-06	0.000181467	3.86231	Hml
FBgn0037721	-0.360086	9.39333	-7.60292	6.74176e-06	0.000181768	3.85834	CG9427
FBgn0038799	0.24469	8.7473	7.58882	6.86792e-06	0.000184775	3.83892	CG4288
FBgn0011701	0.265415	10.0837	7.58018	6.94646e-06	0.000185307	3.82702	repo
FBgn0025726	0.287525	11.1677	7.58125	6.93667e-06	0.000185307	3.82849	unc-13
FBgn0032753	0.26212	8.41455	7.58446	6.90737e-06	0.000185307	3.83293	CG17572
FBgn0035282	-0.376173	7.08087	-7.5831	6.91977e-06	0.000185307	3.83105	CG13936
FBgn0001202	0.21456	9.57113	7.57798	6.96659e-06	0.000185452	3.82399	hk
FBgn0038610	0.295919	9.70775	7.57299	7.01248e-06	0.000186281	3.81711	CG7675
FBgn0033556	0.230625	9.40351	7.57046	7.03591e-06	0.000186511	3.81362	CG12343
FBgn0036585	-0.412582	7.28297	-7.56446	7.09175e-06	0.000187597	3.80534	CG13071
FBgn0020416	-0.308578	11.4808	-7.5568	7.1638e-06	0.000189106	3.79476	Idgf1
FBgn0000719	0.320622	9.1737	7.54272	7.29814e-06	0.00019225	3.7753	fog
FBgn0039789	-0.268656	9.06179	-7.53958	7.32852e-06	0.000192648	3.77095	CG9717
FBgn0039831	0.465789	8.22233	7.53362	7.38646e-06	0.000193768	3.76271	CG12054
FBgn0035967	0.235116	10.8507	7.52429	7.47815e-06	0.000195766	3.74979	CG4641
FBgn0036759	-0.40288	9.79411	-7.51581	7.56259e-06	0.000197567	3.73803	CG5577
FBgn0032422	0.215711	12.3352	7.51165	7.60439e-06	0.00019784	3.73226	CG6579
FBgn0037021	0.27793	8.69306	7.51166	7.60424e-06	0.00019784	3.73228	CG11399
FBgn0037556	0.248319	9.791	7.49939	7.72892e-06	0.000200666	3.71525	CG9636
FBgn0261710	-0.324629	8.84785	-7.47667	7.96557e-06	0.000205962	3.68367	nocte
FBgn0052029	-0.333415	7.46515	-7.47811	7.95041e-06	0.000205962	3.68566	Cpr66D
FBgn0031973	-0.23482	9.05778	-7.47454	7.98813e-06	0.000206123	3.68071	Spn28D
FBgn0001230	-0.423187	7.97479	-7.46958	8.04104e-06	0.000206764	3.67379	Hsp68
FBgn0036016	0.243604	7.30507	7.46914	8.04574e-06	0.000206764	3.67318	CG3306
FBgn0259896	-0.454093	9.483	-7.46289	8.11285e-06	0.000208065	3.66448	nimC1
FBgn0260005	0.241705	9.38084	7.46053	8.13838e-06	0.000208296	3.66119	wtrw
FBgn0039628	0.333932	10.425	7.45106	8.24171e-06	0.000210514	3.64798	CG11841
FBgn0017558	0.282928	11.0327	7.44909	8.26331e-06	0.000210639	3.64524	Pdk
FBgn0035943	-0.443424	7.62974	-7.44717	8.28445e-06	0.000210752	3.64256	CG5653
FBgn0003175	-0.249869	8.92419	-7.44324	8.32797e-06	0.000211433	3.63708	px
FBgn0260660	0.351845	9.54861	7.44128	8.34981e-06	0.000211562	3.63433	mp
FBgn0004512	0.316111	9.57088	7.43309	8.4415e-06	0.000213457	3.6229	Mdr49
FBgn0261382	-0.38772	11.3411	-7.42652	8.51578e-06	0.000214696	3.61372	Bc
FBgn0261374	-0.38772	11.3411	-7.42652	8.51578e-06	0.000214696	3.61372	Phox
FBgn0261362	-0.38772	11.3411	-7.42652	8.51578e-06	0.000214696	3.61372	proPO-A1
FBgn0010052	0.353969	7.43706	7.42575	8.52456e-06	0.000214696	3.61264	Jhe
FBgn0025827	0.225416	11.2541	7.41403	8.65912e-06	0.000217299	3.59624	CG6421
FBgn0030555	-0.299551	9.93833	-7.41375	8.66236e-06	0.000217299	3.59585	Fbxl4
FBgn0028481	0.23446	8.40829	7.41198	8.68285e-06	0.000217381	3.59338	CG4341
FBgn0039734	0.263036	8.70752	7.39635	8.86625e-06	0.000221533	3.57149	Tace
FBgn0010240	0.277187	9.55017	7.37759	9.09197e-06	0.000226337	3.54516	Lcch3
FBgn0039355	-0.281888	6.90987	-7.37739	9.09438e-06	0.000226337	3.54488	CG4730
FBgn0027579	-0.388996	11.1518	-7.37422	9.13315e-06	0.000226409	3.54043	CG5508
FBgn0052057	0.272371	7.49822	7.37467	9.12756e-06	0.000226409	3.54107	dpr10
FBgn0037798	-0.273477	8.992	-7.3681	9.20842e-06	0.000227827	3.53183	CG12817
FBgn0038476	0.23548	10.0948	7.36144	9.29105e-06	0.000229422	3.52248	kuk
FBgn0034804	-0.318158	8.11612	-7.33985	9.56467e-06	0.000235717	3.49208	CG3831
FBgn0013307	-0.428353	10.8959	-7.33658	9.6069e-06	0.000236296	3.48747	Odc1
FBgn0052220	0.298473	9.98033	7.32577	9.74777e-06	0.000239295	3.47223	Csas
FBgn0031824	-0.428089	9.42573	-7.32047	9.81754e-06	0.000240539	3.46476	CG9547
FBgn0034485	0.236045	9.78425	7.30493	1.00256e-05	0.00024466	3.4428	CG11099
FBgn0035194	-0.227115	7.08989	-7.30428	1.00343e-05	0.00024466	3.44189	Psf1
FBgn0039152	-0.544106	9.21641	-7.30357	1.00439e-05	0.00024466	3.44088	CG6129
FBgn0031883	0.254267	10.4693	7.3001	1.00911e-05	0.000245336	3.43597	CG11266
FBgn0029831	0.399351	9.27034	7.29308	1.01873e-05	0.000246725	3.42604	CG5966
FBgn0039311	-0.331968	9.32472	-7.29333	1.01838e-05	0.000246725	3.4264	CG10513
FBgn0028482	0.224803	10.4515	7.27835	1.03922e-05	0.000251206	3.40518	CG16857
FBgn0015772	0.24875	9.71055	7.26732	1.05486e-05	0.000254497	3.38954	Nak
FBgn0031081	0.251732	9.64334	7.24137	1.09264e-05	0.000262608	3.35269	Nep3
FBgn0050046	-0.405823	8.30011	-7.24194	1.09179e-05	0.000262608	3.35351	CG30046
FBgn0043535	0.281013	10.2217	7.23439	1.10304e-05	0.000264604	3.34277	Obp57a
FBgn0022355	-0.426539	11.8988	-7.23156	1.10729e-05	0.00026512	3.33874	Tsf1
FBgn0033484	0.240073	10.5169	7.22819	1.11238e-05	0.000265832	3.33394	CG2269
FBgn0051678	0.225194	10.4092	7.21801	1.12788e-05	0.000269028	3.31945	CG31678
FBgn0039098	-0.425485	7.49499	-7.21596	1.13104e-05	0.000269272	3.31652	CG13822
FBgn0259142	0.208863	8.08242	7.21379	1.13437e-05	0.000269557	3.31344	Snp
FBgn0010551	-0.227804	11.2605	-7.20658	1.14556e-05	0.000271195	3.30316	l(2)03709
FBgn0030594	-0.669504	7.87026	-7.20791	1.14349e-05	0.000271195	3.30506	CG9509
FBgn0030518	-0.26763	9.48147	-7.20408	1.14947e-05	0.000271611	3.29959	CG11134
FBgn0034717	-0.219795	8.74253	-7.18655	1.17727e-05	0.000277142	3.27456	CG5819
FBgn0043791	-0.634483	8.50015	-7.16632	1.21025e-05	0.000284375	3.24563	CG8147
FBgn0026206	0.261489	8.22852	7.15154	1.23497e-05	0.000289416	3.22446	mei-P26
FBgn0039759	-0.553244	7.28736	-7.15076	1.23629e-05	0.000289416	3.22334	CG9733
FBgn0038286	0.247198	9.21505	7.14361	1.24845e-05	0.000291721	3.21309	CG6966
FBgn0029854	-0.267476	10.7458	-7.13433	1.26444e-05	0.000294911	3.19976	CG3566
FBgn0003862	0.249706	9.01322	7.12925	1.27328e-05	0.000296425	3.19247	trx
FBgn0020269	0.233695	8.26925	7.12264	1.28487e-05	0.000298573	3.18297	mspo
FBgn0051323	0.308308	6.7285	7.11546	1.29759e-05	0.000300975	3.17265	CG31323
FBgn0039647	0.432851	8.05284	7.10839	1.31027e-05	0.000303358	3.16247	CG14509
FBgn0026262	0.228784	10.6268	7.10366	1.31882e-05	0.000304778	3.15566	bip2
FBgn0032796	0.218808	10.3153	7.10146	1.3228e-05	0.000305139	3.15251	CG10188
FBgn0022708	-0.237856	11.3174	-7.09924	1.32684e-05	0.000305513	3.14931	Adk2
FBgn0250867	0.256794	9.30255	7.08567	1.35187e-05	0.000310709	3.12974	CG42238
FBgn0039483	0.350283	10.3712	7.07236	1.37689e-05	0.000315883	3.11054	CG14259
FBgn0031312	-0.245862	8.52975	-7.06269	1.39538e-05	0.000319545	3.09657	Tango14
FBgn0260387	-0.236245	8.01346	-7.06067	1.39927e-05	0.000319855	3.09365	CG42513
FBgn0260388	-0.236245	8.01346	-7.06067	1.39927e-05	0.000319855	3.09365	CG42514
FBgn0037842	-0.307679	9.41557	-7.0586	1.40327e-05	0.00032019	3.09066	CG6567
FBgn0025712	0.199656	10.1554	7.05454	1.41117e-05	0.000321411	3.08479	CG13920
FBgn0033032	0.251274	8.97845	7.05254	1.41506e-05	0.000321716	3.0819	kune
FBgn0250757	0.201177	6.96836	7.03955	1.44071e-05	0.000326958	3.06309	CG42235
FBgn0037240	0.195538	9.8905	7.03483	1.45015e-05	0.000328509	3.05625	Cont
FBgn0042119	-0.376054	12.8293	-7.03328	1.45325e-05	0.000328621	3.05402	Cpr65Au
FBgn0034176	-0.210526	9.73542	-7.03079	1.45826e-05	0.000329166	3.05041	ste24a
FBgn0030412	0.198075	11.0043	7.02905	1.46179e-05	0.000329372	3.04788	tomosyn
FBgn0038453	0.214313	10.0367	6.99686	1.52849e-05	0.000343787	3.00116	CG10326
FBgn0030336	0.252981	8.89789	6.9946	1.5333e-05	0.000344257	2.99786	CG1578
FBgn0052512	-0.503933	8.73101	-6.99093	1.54114e-05	0.000345401	2.99253	CG32512
FBgn0010383	0.334609	9.69449	6.98069	1.56323e-05	0.000349731	2.97762	Cyp18a1
FBgn0030897	0.248776	9.35947	6.97767	1.56981e-05	0.000350582	2.97322	Frq1
FBgn0023179	0.305969	9.86884	6.96587	1.5958e-05	0.000355261	2.95603	amon
FBgn0039350	0.237609	9.21005	6.9656	1.59639e-05	0.000355261	2.95564	jigr1
FBgn0027836	-0.557895	10.5228	-6.96038	1.60803e-05	0.000357221	2.94803	Dgp-1
FBgn0027572	-0.27592	10.3328	-6.95174	1.62752e-05	0.000360916	2.93542	CG5009
FBgn0039911	0.266285	10.137	6.94726	1.63771e-05	0.000362537	2.92888	CG1909
FBgn0000492	-0.575671	8.48441	-6.93734	1.66054e-05	0.000366947	2.91439	Dr
FBgn0033321	-0.25715	8.86828	-6.92177	1.69706e-05	0.000374363	2.89161	CG8738
FBgn0022774	-0.278469	10.2713	-6.91447	1.71448e-05	0.000377545	2.88091	Oat
FBgn0001112	0.412975	8.3547	6.90438	1.73885e-05	0.000382243	2.86614	Gld
FBgn0016131	0.210905	7.57351	6.902	1.74467e-05	0.000382857	2.86264	Cdk4
FBgn0032514	-0.2163	8.0551	-6.8917	1.77002e-05	0.000387744	2.84753	CG9302
FBgn0051660	0.308242	8.21473	6.88313	1.79142e-05	0.000391753	2.83495	pog
FBgn0051781	0.316026	8.78145	6.88114	1.79642e-05	0.000392167	2.83203	CG31781
FBgn0051342	0.198491	9.39921	6.87744	1.80578e-05	0.000393529	2.82659	CG31342
FBgn0010215	0.219205	10.2751	6.8756	1.81046e-05	0.000393869	2.82388	alpha-Cat
FBgn0050118	0.217232	9.94566	6.87074	1.82285e-05	0.000395882	2.81674	CG30118
FBgn0053202	0.331248	7.28065	6.86823	1.82929e-05	0.000396598	2.81304	dpr11
FBgn0023477	-0.340646	12.1614	-6.86071	1.84872e-05	0.000400124	2.80198	Tal
FBgn0028985	-0.236322	10.8525	-6.85388	1.86657e-05	0.000403293	2.79192	Spn4
FBgn0011737	0.232666	9.52154	6.84406	1.89254e-05	0.000408207	2.77745	wee
FBgn0036576	-0.284928	7.90214	-6.84117	1.90025e-05	0.00040917	2.77319	CG5151
FBgn0027594	0.230794	10.3624	6.82936	1.93216e-05	0.000414626	2.75576	drpr
FBgn0041710	-0.283026	8.03399	-6.83027	1.92967e-05	0.000414626	2.75711	yellow-f
FBgn0034920	0.248115	10.671	6.82658	1.93974e-05	0.000415545	2.75166	CG5597
FBgn0033538	0.189287	8.31868	6.8237	1.94765e-05	0.000416532	2.7474	CG11883
FBgn0013303	0.2243	10.6059	6.81791	1.96361e-05	0.000417974	2.73885	Nca
FBgn0032287	-0.412456	9.85247	-6.81968	1.95872e-05	0.000417974	2.74146	CG6415
FBgn0037935	-0.286435	9.50154	-6.81765	1.96433e-05	0.000417974	2.73847	CG6834
FBgn0015589	0.266608	10.4948	6.81465	1.97267e-05	0.000419043	2.73403	Apc
FBgn0260658	0.205063	7.0919	6.80813	1.99091e-05	0.000422206	2.7244	CG42541
FBgn0034277	-0.210565	9.94445	-6.80453	2.00106e-05	0.000423648	2.71907	CG6370
FBgn0039849	-0.369064	9.50265	-6.80179	2.00884e-05	0.000424581	2.71501	CG11334
FBgn0036121	-0.267162	7.80894	-6.80036	2.01289e-05	0.000424727	2.7129	CG6310
FBgn0029881	0.266161	9.1135	6.79822	2.019e-05	0.000425304	2.70973	pigs
FBgn0034808	0.220331	8.75174	6.79257	2.0352e-05	0.00042658	2.70136	CG9896
FBgn0035173	0.252444	9.04538	6.79279	2.03456e-05	0.00042658	2.70169	CG13907
FBgn0040256	-0.510271	9.15815	-6.79406	2.03092e-05	0.00042658	2.70357	Ugt86Dd
FBgn0036622	-0.262933	9.37868	-6.79103	2.03964e-05	0.000426802	2.69908	CG4753
FBgn0011576	-0.319375	9.60317	-6.78249	2.06445e-05	0.000430566	2.68642	Cyp4d2
FBgn0086686	0.432714	8.53628	6.78316	2.06249e-05	0.000430566	2.68741	l(3)L1231
FBgn0065032	-0.244597	7.39747	-6.78075	2.06953e-05	0.000430912	2.68385	Arpc3B
FBgn0063667	-0.289702	7.49099	-6.77905	2.07451e-05	0.000431239	2.68133	CG32335
FBgn0037553	-0.345275	9.44101	-6.77554	2.08487e-05	0.00043268	2.67611	CG18249
FBgn0032336	0.286508	10.5792	6.77328	2.09155e-05	0.000433009	2.67276	Ast-C
FBgn0035206	-0.186929	9.5809	-6.77268	2.09333e-05	0.000433009	2.67188	CG9186
FBgn0032129	0.248352	8.41075	6.76116	2.1278e-05	0.00043942	2.65478	jp
FBgn0029994	-0.307483	12.239	-6.75768	2.13835e-05	0.000440878	2.6496	CG2254
FBgn0037060	0.207423	7.99286	6.75342	2.1513e-05	0.000442825	2.64327	CG10508
FBgn0010381	-1.06914	9.99912	-6.73942	2.19454e-05	0.000450255	2.62244	Drs
FBgn0015269	0.293052	8.46302	6.73957	2.19406e-05	0.000450255	2.62267	Nf1
FBgn0040074	0.201729	13.4709	6.73166	2.21888e-05	0.000454511	2.61089	retinin
FBgn0261953	0.209275	8.35523	6.72862	2.22851e-05	0.000455742	2.60636	AP-2
FBgn0036667	-0.225638	10.0992	-6.72491	2.24031e-05	0.000457415	2.60083	CG9669
FBgn0031298	-0.270909	9.59627	-6.71649	2.26733e-05	0.000462184	2.58828	Atg4
FBgn0036294	0.207976	7.91366	6.70498	2.30482e-05	0.000469068	2.57111	CG10654
FBgn0036752	-0.302726	8.53056	-6.70189	2.31502e-05	0.000470385	2.56649	Adgf-A
FBgn0086675	0.420279	9.67343	6.69375	2.34205e-05	0.000475113	2.55434	fne
FBgn0030239	-0.349443	10.1907	-6.67663	2.40004e-05	0.000486094	2.52873	CG17333
FBgn0011693	0.186965	13.9842	6.66866	2.42758e-05	0.000489095	2.51679	Pdh
FBgn0013949	-0.350187	11.5124	-6.66452	2.44199e-05	0.000489095	2.51059	Ela
FBgn0029866	-0.261313	9.02045	-6.66663	2.43462e-05	0.000489095	2.51376	CG3842
FBgn0035082	-0.223318	9.96851	-6.66582	2.43744e-05	0.000489095	2.51255	CG2811
FBgn0036550	0.192596	7.84136	6.66462	2.44164e-05	0.000489095	2.51074	CG17026
FBgn0037801	-0.259207	8.81152	-6.66563	2.43813e-05	0.000489095	2.51225	CG3999
FBgn0041604	-0.287679	8.67578	-6.66557	2.43833e-05	0.000489095	2.51216	dlp
FBgn0051140	0.23406	9.18045	6.66184	2.45138e-05	0.000490198	2.50658	CG31140
FBgn0034970	0.217678	8.989	6.66063	2.45562e-05	0.00049027	2.50477	yki
FBgn0031285	0.243037	12.0756	6.65689	2.46882e-05	0.000492125	2.49916	CG3662
FBgn0037975	-0.648316	7.84741	-6.64247	2.52037e-05	0.000500032	2.47752	CG3397
FBgn0053110	0.361952	9.7034	6.64421	2.51409e-05	0.000500032	2.48014	CG33110
FBgn0086346	0.249876	10.5857	6.64322	2.51768e-05	0.000500032	2.47864	ALiX
FBgn0050392	0.196406	9.16354	6.63559	2.54541e-05	0.000504206	2.46718	CG30392
FBgn0040005	0.186632	10.0436	6.63301	2.55483e-05	0.000505281	2.46331	CG17883
FBgn0024308	0.299924	9.19565	6.62885	2.57012e-05	0.000505322	2.45706	Smr
FBgn0036398	0.268373	8.9619	6.6286	2.57106e-05	0.000505322	2.45668	CG9007
FBgn0036773	0.261526	7.72437	6.62991	2.56622e-05	0.000505322	2.45865	CG13698
FBgn0037163	0.200998	10.0508	6.63159	2.56003e-05	0.000505322	2.46118	laza
FBgn0028494	0.242764	11.7001	6.61358	2.62718e-05	0.000515548	2.43408	CG6424
FBgn0050033	-0.558538	10.3118	-6.60952	2.64257e-05	0.000517762	2.42796	CG30033
FBgn0015622	-0.272282	11.9633	-6.60836	2.64698e-05	0.000517823	2.42622	Cnx99A
FBgn0030262	-0.466635	11.6567	-6.60236	2.66993e-05	0.000521505	2.41718	Vago
FBgn0051111	0.224302	7.92317	6.59803	2.68662e-05	0.000523953	2.41066	CG31111
FBgn0031561	-0.183158	14.2303	-6.59056	2.71568e-05	0.000528804	2.3994	CG16712
FBgn0004861	0.227837	9.16565	6.58263	2.74694e-05	0.000533653	2.38742	ph-p
FBgn0035383	-0.250965	10.1192	-6.5821	2.74904e-05	0.000533653	2.38662	CG2107
FBgn0040636	0.247001	8.80946	6.57516	2.77668e-05	0.00053819	2.37615	CG13255
FBgn0030817	0.277575	8.60133	6.56786	2.80613e-05	0.000543063	2.3651	CG4991
FBgn0034726	0.24852	8.4716	6.56507	2.81746e-05	0.000544422	2.36089	Mes4
FBgn0001128	-0.250184	11.5396	-6.56373	2.82292e-05	0.000544642	2.35886	Gpdh
FBgn0050492	-0.210316	10.7938	-6.55208	2.87086e-05	0.000553046	2.34123	CG30492
FBgn0038925	0.22176	10.5378	6.54967	2.88086e-05	0.000553282	2.3376	Cchl
FBgn0085294	0.344795	7.79288	6.55068	2.87666e-05	0.000553282	2.33912	CG34265
FBgn0036786	0.264786	7.54502	6.54589	2.89667e-05	0.000554631	2.33187	skl
FBgn0052068	-0.25438	11.3201	-6.54592	2.89653e-05	0.000554631	2.33192	CG32068
FBgn0014877	-0.244523	8.70099	-6.5419	2.91343e-05	0.000556343	2.32583	Roe1
FBgn0034381	0.197241	7.60213	6.54167	2.91443e-05	0.000556343	2.32547	CG15088
FBgn0033691	-0.224301	11.758	-6.53146	2.95786e-05	0.00056378	2.30999	CG8860
FBgn0040733	-0.218449	13.6396	-6.52903	2.96828e-05	0.000564914	2.30631	CG15068
FBgn0039269	0.226551	9.99075	6.51432	3.0323e-05	0.000576229	2.28397	veli
FBgn0040070	-0.197296	11.9732	-6.51126	3.04578e-05	0.000577919	2.27933	Trx-2
FBgn0004554	-0.286116	7.1594	-6.50563	3.07077e-05	0.000581237	2.27078	Edg91
FBgn0035344	-0.395721	9.43141	-6.50422	3.07708e-05	0.000581237	2.26863	Cyp4d20
FBgn0039558	-0.211635	7.77952	-6.50443	3.07617e-05	0.000581237	2.26894	CG4980
FBgn0041150	0.195753	10.9371	6.49912	3.09997e-05	0.000583812	2.26088	hoe1
FBgn0051057	0.289214	10.3669	6.49974	3.0972e-05	0.000583812	2.26181	tau
FBgn0040321	-0.327332	10.7285	-6.49583	3.11484e-05	0.000584866	2.25587	GNBP3
FBgn0066101	0.186186	7.55868	6.49599	3.11411e-05	0.000584866	2.25612	LpR1
FBgn0028875	0.343359	8.47712	6.49309	3.12728e-05	0.000585461	2.2517	nAcRalpha-34E
FBgn0030723	0.282904	9.32375	6.49348	3.12551e-05	0.000585461	2.25229	dpr18
FBgn0030668	-0.230895	9.91223	-6.48784	3.15126e-05	0.000588205	2.2437	CG8128
FBgn0039682	-0.271423	14.0808	-6.48865	3.14754e-05	0.000588205	2.24494	Obp99c
FBgn0004654	-0.452349	10.0126	-6.48328	3.17222e-05	0.000588634	2.23676	Pgd
FBgn0035623	-0.453121	7.59373	-6.48349	3.17126e-05	0.000588634	2.23708	mthl2
FBgn0036896	0.228196	9.84253	6.48443	3.16694e-05	0.000588634	2.23851	wnd
FBgn0038627	-0.180822	8.70277	-6.48404	3.16872e-05	0.000588634	2.23792	CG7694
FBgn0027872	0.216974	7.76864	6.48211	3.17765e-05	0.000588775	2.23498	rdgBbeta
FBgn0261855	0.214497	9.91557	6.48027	3.18617e-05	0.000589488	2.23218	CG42784
FBgn0039821	-0.245944	8.28489	-6.47843	3.19472e-05	0.000590205	2.22937	CG15556
FBgn0014427	0.403731	11.3782	6.47482	3.21155e-05	0.000592446	2.22387	CG11899
FBgn0034045	-0.256971	8.46236	-6.47267	3.22164e-05	0.00059344	2.22059	CG8249
FBgn0036986	0.216906	9.27884	6.47146	3.2273e-05	0.000593615	2.21875	CG5282
FBgn0039229	-0.274374	9.0076	-6.46734	3.24672e-05	0.000595452	2.21247	Saf-B
FBgn0039900	0.251728	10.8179	6.46825	3.24243e-05	0.000595452	2.21386	Syt7
FBgn0010328	0.187874	9.56732	6.46511	3.25731e-05	0.000596528	2.20907	woc
FBgn0031530	0.269148	8.34327	6.46021	3.28068e-05	0.000599937	2.20158	pgant2
FBgn0000038	0.233392	9.81336	6.45532	3.30415e-05	0.000602152	2.19412	nAcRbeta-64B
FBgn0013772	-0.385599	9.37851	-6.45626	3.29964e-05	0.000602152	2.19556	Cyp6a8
FBgn0066114	0.216221	9.21816	6.45471	3.30711e-05	0.000602152	2.19319	GlcAT-I
FBgn0029704	-0.210956	8.87834	-6.45098	3.32519e-05	0.000604571	2.18748	CG2982
FBgn0005427	0.231245	8.90623	6.4494	3.33283e-05	0.000604876	2.18508	ewg
FBgn0040582	-0.445409	10.0944	-6.44866	3.33645e-05	0.000604876	2.18395	CG5791
FBgn0011768	-0.273155	11.3988	-6.44258	3.3662e-05	0.000609394	2.17465	Fdh
FBgn0261263	-0.242998	7.29363	-6.43411	3.40816e-05	0.000615443	2.16169	scrib
FBgn0030286	0.195554	9.28675	6.4329	3.4142e-05	0.000615443	2.15984	CG1657
FBgn0037001	0.20303	11.9082	6.43289	3.41425e-05	0.000615443	2.15983	CG6020
FBgn0039811	-0.264324	7.16143	-6.43137	3.42181e-05	0.000615926	2.15751	CG15550
FBgn0039532	0.290238	8.08034	6.42405	3.45869e-05	0.000621677	2.14629	Mtl
FBgn0029863	-0.276716	9.40838	-6.42125	3.47287e-05	0.000622453	2.14201	CG3823
FBgn0031695	0.183701	8.16322	6.4217	3.4706e-05	0.000622453	2.1427	Cyp4ac3
FBgn0024555	0.200252	10.4917	6.41821	3.48835e-05	0.00062434	2.13736	flfl
FBgn0034935	0.303411	9.80767	6.40945	3.5334e-05	0.000631508	2.12393	CG13565
FBgn0051038	0.215868	8.22073	6.40445	3.55943e-05	0.00063526	2.11625	CG31038
FBgn0003515	0.421268	8.34549	6.40336	3.5651e-05	0.000635374	2.11459	st
FBgn0003353	0.20505	9.04099	6.39134	3.62854e-05	0.000644858	2.09613	sei
FBgn0015229	0.298628	9.00433	6.39151	3.62763e-05	0.000644858	2.09639	glec
FBgn0087011	0.272765	7.72099	6.3873	3.65012e-05	0.00064778	2.08993	CG41520
FBgn0030925	-0.278132	8.22164	-6.38336	3.67127e-05	0.00065062	2.08388	CG6361
FBgn0035587	-0.182637	7.02912	-6.38125	3.6827e-05	0.000651729	2.08063	CG4623
FBgn0022023	0.17681	12.1255	6.37782	3.70129e-05	0.000654102	2.07536	eIF-3p40
FBgn0039430	0.247785	10.1453	6.37237	3.73111e-05	0.000656613	2.06697	CG5455
FBgn0044810	0.546912	9.73334	6.37331	3.72592e-05	0.000656613	2.06842	TotX
FBgn0052155	-0.371965	8.2854	-6.37238	3.73103e-05	0.000656613	2.06699	CG32155
FBgn0015774	0.250538	9.35268	6.37029	3.74253e-05	0.000657705	2.06377	NetB
FBgn0039886	0.222808	7.86005	6.36148	3.79134e-05	0.000665356	2.05021	CG2003
FBgn0029766	-0.273526	10.0694	-6.35965	3.80157e-05	0.000666226	2.04739	CG15784
FBgn0038665	0.190697	11.1306	6.35754	3.81338e-05	0.000667369	2.04415	CG12269
FBgn0002570	-0.293217	7.23716	-6.35622	3.8208e-05	0.000667741	2.04211	LvpH
FBgn0000303	0.19978	10.2319	6.34698	3.87321e-05	0.000669481	2.02786	Cha
FBgn0004395	0.315769	6.94048	6.34946	3.85905e-05	0.000669481	2.03169	unk
FBgn0020304	0.180331	11.1561	6.35254	3.84156e-05	0.000669481	2.03645	drongo
FBgn0028406	0.209148	8.71669	6.34732	3.87127e-05	0.000669481	2.02839	Drep-4
FBgn0033205	-0.282761	8.75142	-6.34989	3.8566e-05	0.000669481	2.03236	CG2064
FBgn0036890	0.26777	9.32357	6.35068	3.85213e-05	0.000669481	2.03357	CG9368
FBgn0039817	0.464598	8.21329	6.35215	3.84377e-05	0.000669481	2.03584	CG15553
FBgn0040377	0.221371	7.43765	6.34825	3.86596e-05	0.000669481	2.02982	Vha36-3
FBgn0001187	0.266966	11.3008	6.33389	3.9487e-05	0.000680417	2.00767	Hex-C
FBgn0260486	0.233947	9.77498	6.3346	3.94458e-05	0.000680417	2.00876	CG42533
FBgn0032196	0.190142	9.04896	6.33321	3.95265e-05	0.000680417	2.00662	CG5708
FBgn0051326	-0.385892	9.48094	-6.32938	3.97506e-05	0.000683342	2.00071	CG31326
FBgn0035120	-0.272286	7.9218	-6.32128	4.02292e-05	0.000690629	1.98819	wac
FBgn0030183	0.242997	10.1473	6.31033	4.08858e-05	0.000700947	1.97125	CG15309
FBgn0037993	0.211759	7.5173	6.30684	4.10973e-05	0.000702664	1.96585	dpr15
FBgn0039714	0.1807	9.33442	6.30733	4.10672e-05	0.000702664	1.96662	CG7816
FBgn0015575	-0.247804	12.5373	-6.29911	4.15698e-05	0.000708822	1.9539	alpha-Est7
FBgn0260756	0.237382	8.35119	6.29965	4.15366e-05	0.000708822	1.95473	CG42554
FBgn0260755	0.237382	8.35119	6.29965	4.15366e-05	0.000708822	1.95473	CG42553
FBgn0015664	0.197343	8.33816	6.29452	4.18535e-05	0.000712696	1.94678	Dref
FBgn0036997	-0.285335	9.32817	-6.29341	4.19221e-05	0.000712902	1.94507	CG5955
FBgn0039704	-0.182676	6.90849	-6.28428	4.24937e-05	0.000721649	1.9309	neo
FBgn0035293	0.291595	9.65697	6.2822	4.26246e-05	0.000722899	1.92768	CG5687
FBgn0050158	0.191908	9.40166	6.27694	4.29584e-05	0.000727583	1.91953	CG30158
FBgn0032780	-0.308338	7.72897	-6.27448	4.31154e-05	0.000728914	1.91571	CG13085
FBgn0035975	0.203804	9.2968	6.2739	4.31525e-05	0.000728914	1.91481	PGRP-LA
FBgn0039324	-0.195635	11.0222	-6.26694	4.36011e-05	0.000735506	1.90399	CG10553
FBgn0030850	0.22763	10.166	6.26517	4.37157e-05	0.000736455	1.90125	CG8408
FBgn0029990	-0.189467	14.5615	-6.25363	4.44716e-05	0.000748191	1.88331	CG2233
FBgn0013725	0.219829	8.96059	6.25265	4.45366e-05	0.000748286	1.88179	phyl
FBgn0261802	0.269312	9.7995	6.24965	4.47355e-05	0.000750629	1.87713	CG42748
FBgn0038504	0.2381	9.18609	6.2434	4.51533e-05	0.000756633	1.8674	Sur-8
FBgn0022160	-0.262943	10.3028	-6.2405	4.53487e-05	0.000757894	1.86289	Gpo-1
FBgn0031320	-0.217176	8.04274	-6.24083	4.53262e-05	0.000757894	1.86341	CG5126
FBgn0011591	0.20157	9.8144	6.23795	4.55212e-05	0.00075977	1.85892	fng
FBgn0030545	-0.254245	9.30691	-6.22953	4.60959e-05	0.000768346	1.8458	CG11590
FBgn0261554	-0.176523	10.2372	-6.22618	4.63261e-05	0.000771164	1.84059	CG42672
FBgn0037167	-0.275224	8.60058	-6.22421	4.64625e-05	0.000772417	1.83751	CG11425
FBgn0015737	-0.196586	10.468	-6.21239	4.72892e-05	0.000785126	1.81907	Hmu
FBgn0083919	0.265947	11.4219	6.20808	4.75941e-05	0.000789148	1.81235	Zasp52
FBgn0010387	-0.402967	12.2477	-6.20613	4.77328e-05	0.00079041	1.8093	Dbi
FBgn0034126	-0.478075	7.92253	-6.20087	4.81095e-05	0.000795604	1.80108	CG4398
FBgn0027070	-0.172027	8.86881	-6.1992	4.82293e-05	0.000796422	1.79848	CG17322
FBgn0032820	-0.227261	12.4682	-6.19843	4.82852e-05	0.000796422	1.79727	fbp
FBgn0039864	-0.284806	9.22846	-6.19689	4.83964e-05	0.000797214	1.79486	CG11550
FBgn0026160	0.293015	9.15245	6.19156	4.87832e-05	0.000800451	1.78654	tna
FBgn0034978	0.214449	10.238	6.19296	4.86811e-05	0.000800451	1.78873	CG3257
FBgn0036945	-0.23007	8.20265	-6.19235	4.8726e-05	0.000800451	1.78777	CG6981
FBgn0035521	0.206193	10.411	6.18957	4.89285e-05	0.000801793	1.78343	VhaM9.7-a
FBgn0034058	-0.173831	9.38777	-6.18436	4.93113e-05	0.000807017	1.77528	CG8315
FBgn0051133	0.233484	7.1627	6.17935	4.96828e-05	0.000812043	1.76743	CG31133
FBgn0260795	0.213921	11.4553	6.1766	4.9888e-05	0.000814342	1.76312	CG42575
FBgn0030159	0.247475	9.163	6.17233	5.02078e-05	0.000818504	1.75644	CG9689
FBgn0013953	-0.301925	7.79056	-6.1661	5.06787e-05	0.000823799	1.74668	Esp
FBgn0035911	-0.269964	8.89015	-6.16544	5.07285e-05	0.000823799	1.74565	CG6638
FBgn0037231	0.231685	9.56933	6.16627	5.06653e-05	0.000823799	1.74695	vps24
FBgn0037623	0.271596	9.32796	6.16246	5.09557e-05	0.000826426	1.74098	CG9801
FBgn0000541	0.217697	8.61708	6.15656	5.14087e-05	0.000831634	1.73172	E(bx)
FBgn0051716	0.193603	10.5562	6.1569	5.13821e-05	0.000831634	1.73226	CG31716
FBgn0019982	-0.220601	9.63231	-6.14822	5.20557e-05	0.000839368	1.71865	Gs1l
FBgn0036202	0.234807	8.98398	6.14877	5.20133e-05	0.000839368	1.7195	CG6024
FBgn0086706	0.180497	12.0454	6.14783	5.20863e-05	0.000839368	1.71803	pix
FBgn0014026	0.168048	13.9384	6.14015	5.2691e-05	0.000847725	1.70596	RpL7A
FBgn0038880	0.177922	7.00024	6.13954	5.27392e-05	0.000847725	1.705	SIFR
FBgn0000299	-0.41317	9.7271	-6.13507	5.30942e-05	0.000852345	1.69799	Cg25C
FBgn0030892	0.187742	8.68143	6.13365	5.32076e-05	0.000853079	1.69576	CG7206
FBgn0011764	0.232615	9.09044	6.12878	5.35987e-05	0.000856391	1.6881	Dsp1
FBgn0036891	-0.197242	10.5988	-6.12855	5.36178e-05	0.000856391	1.68773	CG9372
FBgn0259111	0.194107	8.84995	6.12861	5.36127e-05	0.000856391	1.68783	Ndae1
FBgn0008654	0.207073	8.58085	6.12734	5.37149e-05	0.000856857	1.68584	Su(z)2
FBgn0035710	0.261911	9.18663	6.12369	5.40112e-05	0.000860496	1.68009	SP1173
FBgn0030079	0.249044	11.544	6.12216	5.41355e-05	0.000861022	1.67768	CG7267
FBgn0031893	0.22686	9.29853	6.1216	5.41807e-05	0.000861022	1.67681	CG4495
FBgn0005677	0.183318	7.91097	6.11775	5.44958e-05	0.00086494	1.67075	dac
FBgn0037788	0.244983	10.0868	6.11534	5.46942e-05	0.000867	1.66695	CG3940
FBgn0261477	0.212914	10.1388	6.10456	5.55893e-05	0.000880082	1.64998	slim
FBgn0033134	-0.249325	9.74936	-6.10362	5.5668e-05	0.000880223	1.6485	Tsp42El
FBgn0024277	0.177441	10.263	6.09961	5.6006e-05	0.000883355	1.64217	trio
FBgn0038498	0.264384	8.64581	6.10022	5.59545e-05	0.000883355	1.64313	beat-IIa
FBgn0260657	0.330783	10.0015	6.09682	5.62414e-05	0.00088596	1.63779	CG42540
FBgn0013720	0.181198	9.97555	6.09557	5.63479e-05	0.00088653	1.63581	pck
FBgn0010114	0.221075	10.5279	6.09236	5.6621e-05	0.000887664	1.63075	hig
FBgn0020368	0.184009	11.6311	6.09278	5.65853e-05	0.000887664	1.63141	Vha68-1
FBgn0033000	0.192275	9.54374	6.09158	5.66878e-05	0.000887664	1.62952	CG14464
FBgn0037468	0.22338	10.9922	6.09143	5.67013e-05	0.000887664	1.62927	CG1943
FBgn0036595	-0.218646	7.17089	-6.0891	5.69009e-05	0.000889685	1.6256	CG13046
FBgn0031762	0.18478	8.50115	6.08596	5.71714e-05	0.000892808	1.62064	CG9098
FBgn0260944	0.254773	8.78066	6.08128	5.7576e-05	0.000894698	1.61327	Rbp1
FBgn0017414	-0.174935	8.57918	-6.08137	5.75684e-05	0.000894698	1.61341	cag
FBgn0029932	-0.233242	9.5709	-6.08342	5.73904e-05	0.000894698	1.61664	CG4607
FBgn0030051	-0.230557	7.68117	-6.08283	5.74421e-05	0.000894698	1.6157	spirit
FBgn0041203	0.196935	8.94469	6.07664	5.79813e-05	0.000899886	1.60594	LIMK1
FBgn0037440	-0.305745	9.59219	-6.07242	5.83527e-05	0.000903429	1.59926	CG1041
FBgn0038721	-0.281397	9.14997	-6.07262	5.83345e-05	0.000903429	1.59959	CG16718
FBgn0035495	0.44528	10.9719	6.06794	5.87494e-05	0.000908455	1.59218	CG14989
FBgn0029997	0.232713	8.84333	6.05705	5.97253e-05	0.000922416	1.57496	CG2258
FBgn0036300	-0.183137	9.44582	-6.05464	5.99436e-05	0.000924655	1.57114	CG10688
FBgn0000108	0.337225	10.6317	6.05168	6.0212e-05	0.000927662	1.56647	Appl
FBgn0035765	0.194879	9.82449	6.04705	6.0636e-05	0.000933055	1.55914	CG8600
FBgn0040080	0.276147	8.17065	6.04345	6.09681e-05	0.000937023	1.55343	raps
FBgn0086441	0.180616	9.60414	6.0387	6.14083e-05	0.000942639	1.54591	hkl
FBgn0027932	0.228798	11.5449	6.02993	6.22309e-05	0.000953568	1.532	Akap200
FBgn0039450	-0.18595	9.07811	-6.0295	6.22714e-05	0.000953568	1.53132	CG5484
FBgn0036620	0.296513	10.0107	6.02554	6.26468e-05	0.000958155	1.52504	CG4842
FBgn0001220	-0.191376	11.7169	-6.01709	6.34559e-05	0.000969354	1.51163	Hsc70-5
FBgn0039678	0.98698	11.117	6.00788	6.43505e-05	0.000981831	1.497	Obp99a
FBgn0027654	0.22305	9.48565	6.00705	6.4432e-05	0.000981888	1.49567	jdp
FBgn0014342	-0.281256	7.69905	-6.00189	6.49392e-05	0.000986178	1.48748	mia
FBgn0030259	0.257839	9.53828	6.00215	6.49139e-05	0.000986178	1.48789	CG1545
FBgn0030451	-0.252139	9.60107	-6.0018	6.4948e-05	0.000986178	1.48734	CG15717
FBgn0260775	0.179217	9.27528	5.99946	6.51799e-05	0.000987164	1.48361	DnaJ-60
FBgn0260770	0.179217	9.27528	5.99946	6.51799e-05	0.000987164	1.48361	CG42568
FBgn0032946	0.255709	12.7365	5.99878	6.52476e-05	0.000987164	1.48253	nrv3
FBgn0039494	-0.232712	9.49061	-6.00023	6.51039e-05	0.000987164	1.48483	grass
FBgn0000099	-0.236826	9.05119	-5.98835	6.62919e-05	0.00100088	1.46593	ap
FBgn0037217	-0.208769	8.00905	-5.98814	6.63132e-05	0.00100088	1.4656	CG14636
FBgn0036153	-0.174099	6.30081	-5.98191	6.6946e-05	0.00100923	1.45567	CG7573
FBgn0029502	0.187477	9.17683	5.97868	6.72761e-05	0.00101292	1.45053	COQ7
FBgn0051793	-0.286544	8.23048	-5.97795	6.73511e-05	0.00101292	1.44937	CG31793
FBgn0051973	0.191254	7.93325	5.97632	6.7519e-05	0.00101423	1.44677	Cda5
FBgn0030941	-0.164137	9.73858	-5.97043	6.81283e-05	0.00102217	1.43738	wgn
FBgn0032835	-0.488538	10.7991	-5.9694	6.82352e-05	0.00102256	1.43574	CG16772
FBgn0039802	0.309542	9.36006	5.96818	6.83616e-05	0.00102323	1.43381	dj-1beta
FBgn0032613	-0.186569	9.2972	-5.96602	6.85882e-05	0.00102541	1.43035	CG13283
FBgn0036529	-0.277621	6.8646	-5.96338	6.88648e-05	0.00102833	1.42614	pgant8
FBgn0000346	0.157576	11.3592	5.96258	6.89486e-05	0.00102836	1.42487	comt
FBgn0085354	0.201004	8.84362	5.96093	6.91229e-05	0.00102974	1.42223	CG34325
FBgn0040309	-0.215448	12.7616	-5.95702	6.9537e-05	0.00103469	1.41599	Jafrac1
FBgn0037714	-0.359802	10.3442	-5.95437	6.9819e-05	0.00103522	1.41177	CG9396
FBgn0038291	-0.246626	7.86487	-5.95461	6.97932e-05	0.00103522	1.41215	CG3984
FBgn0086253	-0.164722	7.56923	-5.95498	6.97544e-05	0.00103522	1.41273	rumi
FBgn0039205	0.183225	9.35698	5.9521	7.00617e-05	0.0010376	1.40814	CG13623
FBgn0250908	-0.252078	7.05403	-5.9429	7.10542e-05	0.00105107	1.39344	beat-VII
FBgn0034155	0.242376	11.4811	5.9303	7.2438e-05	0.00106903	1.37329	unc-104
FBgn0051199	0.253287	10.5988	5.93083	7.23785e-05	0.00106903	1.37415	CG31199
FBgn0086783	0.218855	12.9819	5.92866	7.26195e-05	0.00107046	1.37067	Mhc
FBgn0029663	0.225663	8.30316	5.92686	7.28197e-05	0.00107216	1.3678	CG10804
FBgn0019650	0.283965	8.32889	5.9252	7.3006e-05	0.00107365	1.36513	toy
FBgn0005695	0.205283	9.0486	5.91978	7.3615e-05	0.00108134	1.35645	gcl
FBgn0054003	-0.42286	8.81694	-5.91141	7.4565e-05	0.00109402	1.34305	nimB3
FBgn0050380	-0.213795	8.10621	-5.90904	7.48373e-05	0.00109674	1.33925	CG30380
FBgn0038853	0.189074	9.13634	5.90751	7.50132e-05	0.00109805	1.33679	RhoGAP93B
FBgn0014031	-0.27938	11.6381	-5.90508	7.52934e-05	0.00110087	1.3329	Spat
FBgn0085360	-0.312158	11.104	-5.90108	7.5757e-05	0.00110637	1.32648	CG34331
FBgn0031405	-0.276321	8.9077	-5.89666	7.62724e-05	0.00111239	1.3194	CG4267
FBgn0032889	-0.214009	11.6534	-5.89604	7.63459e-05	0.00111239	1.3184	CG9331
FBgn0031904	0.247759	9.59801	5.89094	7.6946e-05	0.00111984	1.31022	CG5149
FBgn0037963	0.185363	9.15651	5.88873	7.72074e-05	0.00112235	1.30667	Cad87A
FBgn0032151	0.27694	7.41406	5.88748	7.73568e-05	0.00112323	1.30465	nAcRalpha-30D
FBgn0034200	-0.183062	12.4246	-5.87961	7.82979e-05	0.00113559	1.29202	CG11395
FBgn0039611	-0.394563	9.86963	-5.87715	7.85957e-05	0.0011386	1.28806	CG14528
FBgn0036993	-0.28022	9.85331	-5.87628	7.87004e-05	0.00113881	1.28667	CG5910
FBgn0027491	0.196143	10.7086	5.87291	7.91094e-05	0.00114342	1.28125	Cdk5alpha
FBgn0053329	-0.201178	8.09442	-5.87108	7.93328e-05	0.00114533	1.27831	Sp212
FBgn0064237	-0.235319	9.74309	-5.86812	7.9695e-05	0.00114925	1.27355	Idgf5
FBgn0035982	-0.257335	10.7439	-5.86428	8.01679e-05	0.00115475	1.26737	CG4461
FBgn0004169	0.235714	8.70506	5.86205	8.04444e-05	0.00115741	1.26377	up
FBgn0035280	-0.346001	8.85068	-5.85394	8.14559e-05	0.00117063	1.25072	Cpr62Bb
FBgn0013563	-0.177578	7.44595	-5.85028	8.19166e-05	0.00117165	1.24483	pex1
FBgn0023526	0.179114	8.87495	5.85037	8.19056e-05	0.00117165	1.24497	CG2865
FBgn0034733	-0.214137	9.27719	-5.85209	8.16888e-05	0.00117165	1.24774	CG4752
FBgn0043533	-0.296905	6.73647	-5.85029	8.19158e-05	0.00117165	1.24484	Obp56f
FBgn0052206	0.213519	8.21267	5.84969	8.19911e-05	0.00117165	1.24388	CG32206
FBgn0052406	0.21176	7.5933	5.84842	8.21524e-05	0.00117262	1.24183	CG32406
FBgn0019925	-0.202395	10.9308	-5.84053	8.31586e-05	0.00118564	1.22911	Surf4
FBgn0015795	0.222286	12.1555	5.83608	8.37322e-05	0.00119247	1.22194	Rab7
FBgn0002931	-0.426416	7.00743	-5.8346	8.39238e-05	0.00119386	1.21955	net
FBgn0010591	0.220989	11.1714	5.82891	8.46652e-05	0.00120305	1.21036	Sply
FBgn0033984	0.199948	8.20783	5.80916	8.7291e-05	0.00123896	1.17847	Lap1
FBgn0033162	-0.193599	11.2485	-5.80729	8.75438e-05	0.00124115	1.17545	CG1707
FBgn0002930	-0.190462	11.8363	-5.80275	8.81626e-05	0.00124732	1.16809	nec
FBgn0037879	-0.263067	6.57226	-5.80264	8.81767e-05	0.00124732	1.16792	scpr-C
FBgn0032897	0.191581	12.5426	5.8014	8.8346e-05	0.00124784	1.16592	CG9336
FBgn0051760	0.203035	8.61526	5.80093	8.8411e-05	0.00124784	1.16515	CG31760
FBgn0027291	0.231218	12.1809	5.79956	8.85986e-05	0.00124909	1.16294	l(1)G0156
FBgn0024230	-0.1645	8.53695	-5.79444	8.93047e-05	0.00125624	1.15465	Hs2st
FBgn0033814	-0.1968	11.2442	-5.79478	8.92573e-05	0.00125624	1.15521	CG4670
FBgn0051122	0.236986	9.05378	5.79316	8.94816e-05	0.00125733	1.15258	CG31122
FBgn0262527	0.211648	9.87408	5.79228	8.96049e-05	0.00125766	1.15115	wah
FBgn0030670	0.191727	10.8535	5.7915	8.97132e-05	0.00125778	1.14989	Pis
FBgn0037890	-0.216882	10.9107	-5.79059	8.98393e-05	0.00125815	1.14842	CG17734
FBgn0051665	0.196049	9.32881	5.78032	9.12827e-05	0.00127695	1.13178	CG31665
FBgn0034094	-0.173399	8.24563	-5.77515	9.20184e-05	0.0012853	1.12339	Tsf3
FBgn0039557	-0.224386	7.70325	-5.77469	9.2084e-05	0.0012853	1.12265	CG12259
FBgn0259834	-0.163074	8.00022	-5.76904	9.28962e-05	0.00129521	1.11348	out
FBgn0003748	0.253172	11.8202	5.766	9.33353e-05	0.0012999	1.10856	Treh
FBgn0050083	-0.51145	9.81467	-5.76518	9.34542e-05	0.00130012	1.10723	CG30083
FBgn0002283	0.221225	8.45504	5.76312	9.37543e-05	0.00130285	1.10388	l(3)73Ah
FBgn0000109	-0.222949	9.91712	-5.7617	9.3962e-05	0.0013043	1.10157	Aprt
FBgn0034259	-0.192387	10.023	-5.75951	9.4282e-05	0.00130731	1.09802	CG6459
FBgn0001090	0.230473	10.8858	5.75592	9.48105e-05	0.001312	1.09219	bnb
FBgn0039623	0.22829	8.47675	5.7558	9.48283e-05	0.001312	1.09199	CG1951
FBgn0250791	0.228993	11.0459	5.75379	9.51255e-05	0.00131443	1.08872	Snap
FBgn0260010	0.177002	10.1694	5.7532	9.52123e-05	0.00131443	1.08777	rump
FBgn0015038	-0.176512	8.70914	-5.7505	9.56128e-05	0.00131708	1.08339	Cyp9b1
FBgn0026250	0.204723	12.0867	5.75072	9.558e-05	0.00131708	1.08375	eIF-1A
FBgn0032774	-0.180125	12.7534	-5.74932	9.57887e-05	0.0013175	1.08147	CG17549
FBgn0038720	0.285675	8.24529	5.7489	9.58522e-05	0.0013175	1.08078	CG6231
FBgn0035720	0.298592	11.427	5.73744	9.75781e-05	0.00133976	1.06215	CG10077
FBgn0030480	-0.20152	9.10553	-5.73033	9.86645e-05	0.00135321	1.05059	Tim9a
FBgn0035092	0.18565	9.07681	5.72815	9.90017e-05	0.00135636	1.04703	Nplp1
FBgn0029769	-0.201534	10.3357	-5.72519	9.94597e-05	0.00135968	1.04221	CG3239
FBgn0039969	0.190602	9.56697	5.72579	9.93666e-05	0.00135968	1.04319	Fis1
FBgn0041210	0.246959	8.53406	5.72449	9.95681e-05	0.00135969	1.04107	HDAC4
FBgn0028527	0.174597	8.68941	5.71687	0.000100759	0.00137447	1.02866	CG18507
FBgn0038074	-1.71135	11.1745	-5.71502	0.00010105	0.00137548	1.02565	CG6188
FBgn0039970	0.207473	10.5748	5.71501	0.000101052	0.00137548	1.02563	CG17508
FBgn0038395	-0.272073	7.80786	-5.71131	0.000101637	0.00138196	1.01961	CG10407
FBgn0001565	0.200632	10.2638	5.70878	0.00010204	0.00138594	1.01548	Hlc
FBgn0085359	-0.418893	11.079	-5.70789	0.000102183	0.00138639	1.01402	CG34330
FBgn0058196	0.205234	10.5494	5.70482	0.000102673	0.00139154	1.00902	CG40196
FBgn0037874	0.216694	13.5551	5.70368	0.000102857	0.00139254	1.00715	Tctp
FBgn0034488	-0.207257	8.91912	-5.70179	0.00010316	0.00139515	1.00408	CG11208
FBgn0039807	0.224645	7.69117	5.69623	0.000104062	0.00140583	0.995001	CG15546
FBgn0051374	-0.245979	9.11908	-5.69363	0.000104486	0.00141006	0.990754	sals
FBgn0024371	0.223856	8.2978	5.68887	0.000105267	0.00141908	0.982983	E2f2
FBgn0015371	0.277435	9.51157	5.68351	0.000106155	0.00142647	0.974217	chn
FBgn0035253	0.184516	9.71743	5.68355	0.000106148	0.00142647	0.97428	CG7971
FBgn0259979	-0.182844	10.0766	-5.68372	0.000106119	0.00142647	0.974572	CG17337
FBgn0011204	-0.245271	9.23695	-5.67655	0.000107317	0.00144056	0.96285	cue
FBgn0037317	0.17393	8.40489	5.67542	0.000107508	0.00144159	0.960997	CG14667
FBgn0003715	0.196783	7.71193	5.67204	0.000108079	0.00144771	0.955466	CG16778
FBgn0038659	0.21717	10.7626	5.67131	0.000108203	0.00144784	0.954268	endoA
FBgn0003060	-0.255085	7.49991	-5.66814	0.000108742	0.00145351	0.949083	CG9757
FBgn0002914	0.223429	9.10667	5.66399	0.000109452	0.00146145	0.942292	Myb
FBgn0034293	0.165925	8.03014	5.6619	0.000109811	0.00146469	0.938877	CG14495
FBgn0026415	-0.195524	13.1802	-5.65999	0.00011014	0.00146753	0.935753	Idgf4
FBgn0038524	-0.211201	9.06002	-5.65096	0.000111713	0.00148692	0.920955	sll
FBgn0011725	0.208684	8.7094	5.64045	0.000113572	0.00150848	0.903733	twin
FBgn0013733	0.193907	11.023	5.64089	0.000113494	0.00150848	0.904451	shot
FBgn0037696	-0.222921	8.86718	-5.63722	0.000114152	0.00151458	0.898424	CG9362
FBgn0035227	0.175662	9.56443	5.63526	0.000114504	0.00151472	0.895208	CG12090
FBgn0038038	-0.216677	10.5305	-5.63566	0.000114431	0.00151472	0.895874	CG5167
FBgn0040965	0.241796	7.97906	5.63516	0.000114522	0.00151472	0.895043	CG13130
FBgn0025620	-0.209313	10.3175	-5.63447	0.000114646	0.00151477	0.893918	CG13360
FBgn0031636	0.207183	9.44191	5.63074	0.000115321	0.00152209	0.887794	CG12194
FBgn0031048	0.188775	10.0549	5.62921	0.000115599	0.00152417	0.885276	CG12237
FBgn0038975	0.244414	9.49598	5.62839	0.000115749	0.00152455	0.883931	Nrx-1
FBgn0031065	0.185661	8.52486	5.62716	0.000115971	0.00152589	0.881925	CG14234
FBgn0031702	-0.275572	10.6436	-5.62373	0.0001166	0.00153256	0.876283	fusl
FBgn0030932	-0.218698	8.73997	-5.618	0.000117657	0.00154485	0.866868	CG6461
FBgn0039156	-0.216005	9.30544	-5.61732	0.000117782	0.00154488	0.865761	CG6178
FBgn0052944	0.257558	7.76484	5.61433	0.000118338	0.00155056	0.860846	CG32944
FBgn0086784	0.194087	9.66104	5.6119	0.000118792	0.0015549	0.85685	stmA
FBgn0033735	-0.263604	9.07611	-5.61055	0.000119046	0.00155661	0.854625	CG8525
FBgn0016926	-0.208641	10.8829	-5.60853	0.000119427	0.00155996	0.851296	Pino
FBgn0035921	0.228871	7.8139	5.60761	0.000119599	0.00156059	0.849795	CG13305
FBgn0035610	0.222256	7.62586	5.60531	0.000120033	0.00156303	0.846013	Lkr
FBgn0039580	0.168641	9.30673	5.60558	0.000119983	0.00156303	0.846448	Gfat2
FBgn0029123	0.289934	9.28759	5.59346	0.000122299	0.0015909	0.8265	SoxN
FBgn0015754	0.222661	10.3669	5.58087	0.000124755	0.00162117	0.805766	Lis-1
FBgn0039000	0.185344	7.95592	5.57467	0.000125984	0.00163378	0.795538	CG6954
FBgn0050499	-0.203443	9.30253	-5.57522	0.000125873	0.00163378	0.796454	CG30499
FBgn0250839	0.21775	10.4174	5.57394	0.000126129	0.00163398	0.79434	CG2016
FBgn0004066	-0.220698	9.6439	-5.5726	0.000126396	0.00163576	0.79213	Pros28.1
FBgn0039240	0.275034	8.01904	5.56794	0.000127332	0.00164619	0.784435	CG3744
FBgn0027885	0.290522	11.1044	5.56264	0.000128403	0.00165664	0.775697	Aac11
FBgn0041711	-0.256624	8.83975	-5.5628	0.000128372	0.00165664	0.775956	yellow-e
FBgn0028879	0.236793	9.77449	5.56036	0.000128869	0.00165925	0.771925	CG15270
FBgn0086254	-0.27579	12.1122	-5.56084	0.00012877	0.00165925	0.772721	CG6084
FBgn0260635	0.172316	11.4207	5.55437	0.000130096	0.00167335	0.762037	th
FBgn0035868	-0.222295	7.22151	-5.55126	0.000130739	0.00167991	0.756895	CG7194
FBgn0032470	-0.225929	7.20578	-5.54742	0.000131538	0.00168845	0.750543	CG5142
FBgn0032603	-0.194172	9.66268	-5.53519	0.000134114	0.00171977	0.730319	CG17928
FBgn0033529	0.175822	10.3295	5.53178	0.000134842	0.00172735	0.724671	CG17765
FBgn0037010	-0.239905	10.6242	-5.53065	0.000135084	0.00172869	0.722805	CG4825
FBgn0037261	0.203938	11.022	5.52926	0.000135382	0.00173075	0.720507	CG9775
FBgn0261800	-0.226918	8.51333	-5.52297	0.000136742	0.0017402	0.710083	LanB1
FBgn0260798	0.174475	9.64556	5.52423	0.000136468	0.0017402	0.712176	Gprk1
FBgn0026749	0.186837	9.83837	5.5234	0.000136649	0.0017402	0.710795	Yippee
FBgn0030847	0.214326	10.3738	5.52292	0.000136753	0.0017402	0.710003	CG12991
FBgn0050410	-0.313463	9.61011	-5.52265	0.000136811	0.0017402	0.709556	CG30410
FBgn0038016	0.200741	8.72713	5.52121	0.000137124	0.00174243	0.707175	MBD-R2
FBgn0003074	-0.191916	12.1468	-5.51796	0.000137834	0.00174617	0.70179	Pgi
FBgn0011305	0.176454	10.2511	5.51866	0.000137681	0.00174617	0.702947	Rsf1
FBgn0034894	0.177896	9.29174	5.51828	0.000137764	0.00174617	0.702316	CG4091
FBgn0000635	0.164872	8.93678	5.51444	0.000138606	0.00175244	0.695962	Fas2
FBgn0003011	0.185671	7.8583	5.51505	0.000138472	0.00175244	0.696975	ort
FBgn0261549	0.202795	8.28192	5.51363	0.000138785	0.00175294	0.694623	rdgA
FBgn0034693	0.272912	10.233	5.51232	0.000139074	0.00175309	0.692449	CG11073
FBgn0039031	-0.220542	12.235	-5.51245	0.000139047	0.00175309	0.692657	CG17244
FBgn0034021	0.192765	8.8862	5.51076	0.000139421	0.0017557	0.689856	CG8180
FBgn0032884	-0.208334	10.6295	-5.50931	0.000139742	0.00175799	0.687457	Pomp
FBgn0039319	-0.299408	6.8537	-5.50457	0.0001408	0.00176426	0.679594	CG13659
FBgn0040091	-0.249082	7.79951	-5.5053	0.000140637	0.00176426	0.680796	Ugt58Fa
FBgn0051674	-0.214773	7.62083	-5.5058	0.000140524	0.00176426	0.681639	CG31674
FBgn0052485	0.213416	9.32611	5.50474	0.000140762	0.00176426	0.679874	CG32485
FBgn0029629	0.189875	12.2861	5.50357	0.000141025	0.00176533	0.677928	CG8636
FBgn0032415	-0.246605	7.06963	-5.50105	0.000141591	0.00177065	0.673753	rho-6
FBgn0030520	0.262528	9.02879	5.4975	0.000142392	0.00177892	0.667865	CG10990
FBgn0025615	-0.239729	9.17569	-5.49615	0.000142699	0.00178099	0.665622	torp4a
FBgn0026721	-0.233638	11.6358	-5.49171	0.000143711	0.00179185	0.658253	fat-spondin
FBgn0036929	-0.201078	9.0864	-5.49008	0.000144085	0.00179473	0.655547	CG7668
FBgn0014163	0.305449	10.0309	5.48591	0.000145047	0.00180398	0.648613	fax
FBgn0023441	-0.199481	9.11353	-5.48539	0.000145167	0.00180398	0.647744	fus
FBgn0029176	0.155107	13.5889	5.485	0.000145256	0.00180398	0.647107	Ef1gamma
FBgn0031627	0.269832	8.46167	5.48343	0.00014562	0.00180672	0.644496	CG15630
FBgn0000639	-0.218264	6.75503	-5.46744	0.000149383	0.00184977	0.617902	Fbp1
FBgn0037727	-0.19626	9.14934	-5.46771	0.000149318	0.00184977	0.618355	CG8358
FBgn0036122	-0.191178	8.13788	-5.46375	0.000150265	0.00185887	0.611766	Mocs1
FBgn0035438	-0.186486	12.1133	-5.45507	0.000152363	0.00188298	0.597312	PHGPx
FBgn0030499	0.175082	7.88117	5.45394	0.00015264	0.00188455	0.595425	CG11178
FBgn0030638	-0.227824	9.07794	-5.45311	0.000152843	0.00188521	0.59404	CG11655
FBgn0016977	0.228529	10.7414	5.45091	0.00015338	0.00188894	0.590384	spen
FBgn0031478	-0.198766	9.52293	-5.45065	0.000153444	0.00188894	0.589945	CG8814
FBgn0040212	-0.241887	8.24597	-5.44933	0.000153767	0.00189107	0.587752	Dhap-at
FBgn0035735	-0.209067	7.07016	-5.4486	0.000153948	0.00189144	0.586532	Cpr65Ea
FBgn0002936	-0.190513	11.4262	-5.44528	0.000154766	0.00189965	0.581005	ninaA
FBgn0028552	0.157697	9.97307	5.4414	0.000155731	0.00190964	0.574524	gammaSnap
FBgn0033627	0.164731	8.4141	5.44001	0.000156076	0.00191201	0.572218	CG13204
FBgn0033055	0.215852	9.06262	5.43911	0.000156301	0.00191291	0.570717	tbce
FBgn0000047	0.302041	7.96546	5.43833	0.000156498	0.00191346	0.569406	Act88F
FBgn0036942	-0.197972	8.02764	-5.43766	0.000156666	0.00191367	0.568286	CG7328
FBgn0031972	0.208689	8.43902	5.43647	0.000156965	0.00191546	0.566301	Wwox
FBgn0051344	-0.185696	10.1647	-5.43304	0.000157829	0.00192415	0.560579	CG31344
FBgn0035033	0.19963	8.49731	5.43114	0.000158309	0.00192814	0.557414	CG3548
FBgn0033809	0.205002	7.75251	5.42784	0.000159148	0.00193648	0.551905	CG4630
FBgn0040493	-0.238347	9.38335	-5.42554	0.000159736	0.00194176	0.548065	granny-smith
FBgn0033464	-0.216277	8.61883	-5.42472	0.000159946	0.00194244	0.546697	CG1441
FBgn0050372	0.239638	8.68161	5.42253	0.000160508	0.00194739	0.543042	CG30372
FBgn0031860	-0.220946	9.52486	-5.41918	0.000161373	0.00195601	0.537437	CG11236
FBgn0030237	0.162766	11.0027	5.41848	0.000161554	0.00195633	0.53627	CG15209
FBgn0015600	0.212521	9.92597	5.41496	0.000162468	0.00196551	0.53039	toc
FBgn0037580	-0.167992	9.27034	-5.41134	0.000163415	0.00197507	0.524334	DppIII
FBgn0033342	-0.152906	9.89692	-5.40613	0.000164786	0.00198973	0.515634	CG8258
FBgn0040360	-0.213913	6.71556	-5.40498	0.00016509	0.00199149	0.513712	CG14626
FBgn0038546	0.178329	9.18352	5.40389	0.00016538	0.00199309	0.51188	CG7379
FBgn0034052	-0.179027	7.27783	-5.40082	0.000166197	0.00200014	0.506749	CG8299
FBgn0051211	0.163141	9.00156	5.4005	0.000166282	0.00200014	0.506216	CG31211
FBgn0261387	0.244229	8.64067	5.39916	0.000166639	0.00200253	0.503977	CG17528
FBgn0034706	0.17163	8.70614	5.39688	0.000167251	0.00200797	0.50016	CG11275
FBgn0020415	-0.199038	12.5628	-5.39384	0.00016807	0.00201588	0.495072	Idgf2
FBgn0000411	0.187822	8.64319	5.38679	0.000169985	0.00203692	0.483267	D
FBgn0037849	0.273803	8.02765	5.38374	0.000170822	0.002045	0.478152	CG4596
FBgn0011290	0.21495	8.92507	5.37849	0.000172269	0.00205589	0.469361	Taf12
FBgn0030912	-0.196285	8.1923	-5.3786	0.000172239	0.00205589	0.469545	CG6023
FBgn0031055	-0.191976	7.67232	-5.37808	0.000172384	0.00205589	0.468669	CG14225
FBgn0035589	0.189534	8.71173	5.37968	0.00017194	0.00205589	0.471355	CHMP2B
FBgn0035238	-0.241171	8.73934	-5.37738	0.000172578	0.00205627	0.467495	CG12104
FBgn0011770	-0.265079	11.1688	-5.37431	0.000173432	0.00206255	0.462351	Gip
FBgn0028429	0.164417	9.86691	5.37447	0.000173388	0.00206255	0.462617	I-2
FBgn0053180	0.213539	9.07068	5.37184	0.000174122	0.00206881	0.458214	Ranbp16
FBgn0037537	0.178092	11.1468	5.37037	0.000174535	0.00207176	0.455748	CG2767
FBgn0051704	0.212809	9.35318	5.36534	0.000175956	0.00208667	0.447299	CG31704
FBgn0003321	0.183643	10.1281	5.35929	0.000177678	0.00209919	0.437159	sbr
FBgn0013981	0.170503	12.7267	5.36023	0.000177409	0.00209919	0.438734	His4r
FBgn0027660	0.168875	9.25971	5.35968	0.000177566	0.00209919	0.437812	blot
FBgn0039565	0.181261	8.05032	5.36039	0.000177364	0.00209919	0.439001	CG4884
FBgn0038733	-0.306131	10.7783	-5.35702	0.000178331	0.00210493	0.433338	CG11407
FBgn0036258	0.162094	12.9345	5.35594	0.000178642	0.00210608	0.431522	CG5642
FBgn0037736	0.195434	7.81628	5.35552	0.000178762	0.00210608	0.430822	CG12950
FBgn0015039	-0.307897	10.5389	-5.35275	0.000179562	0.00211105	0.426169	Cyp9b2
FBgn0033724	-0.1982	7.19684	-5.35325	0.000179418	0.00211105	0.427006	CG8501
FBgn0038549	0.158745	6.97233	5.35233	0.000179685	0.00211105	0.425458	CG17802
FBgn0261270	-0.160696	8.81328	-5.34991	0.000180386	0.00211731	0.4214	SelD
FBgn0027091	-0.153391	8.58062	-5.34867	0.000180748	0.00211959	0.419315	Aats-cys
FBgn0000490	0.269608	8.55712	5.34642	0.000181404	0.00212334	0.415539	dpp
FBgn0034432	-0.15419	12.218	-5.3465	0.000181382	0.00212334	0.415664	CG7461
FBgn0030306	-0.18972	10.0351	-5.34532	0.000181726	0.00212514	0.413691	Spase25
FBgn0038420	0.223849	10.7852	5.34384	0.000182163	0.00212827	0.411192	CG10311
FBgn0003392	0.194566	9.42879	5.34014	0.000183253	0.00213903	0.404976	shi
FBgn0039431	0.267307	7.84834	5.33431	0.000184985	0.00215724	0.395181	CG6490
FBgn0085215	-0.173605	10.9284	-5.33312	0.000185342	0.00215941	0.393175	CG34186
FBgn0035101	0.158823	8.74961	5.32862	0.000186694	0.00217316	0.385601	p130CAS
FBgn0250843	-0.241264	10.0594	-5.32732	0.000187088	0.00217573	0.383409	Pros35
FBgn0030961	0.206599	8.20341	5.32673	0.000187264	0.00217578	0.382427	CG7058
FBgn0015777	0.293155	11.1944	5.32584	0.000187533	0.0021769	0.380932	nrv2
FBgn0039068	0.17157	7.92159	5.32346	0.000188257	0.0021833	0.376919	CG13827
FBgn0031190	0.215947	10.2011	5.31501	0.000190846	0.0022113	0.362694	CG12576
FBgn0040281	0.193403	9.66537	5.31437	0.000191045	0.00221156	0.361612	Aplip1
FBgn0031558	-0.255205	11.2001	-5.30653	0.000193483	0.00223569	0.348405	CG16704
FBgn0036717	-0.197501	7.1973	-5.30683	0.000193391	0.00223569	0.348902	CG13731
FBgn0005563	0.353908	10.4384	5.3032	0.000194532	0.00224574	0.34278	cac
FBgn0033448	0.199459	9.21365	5.29996	0.000195553	0.00225136	0.337325	hebe
FBgn0046876	-0.363274	7.93111	-5.30043	0.000195406	0.00225136	0.33811	Obp83ef
FBgn0052767	0.278951	8.94093	5.30054	0.000195371	0.00225136	0.338297	CG32767
FBgn0035476	-0.175661	7.71451	-5.28746	0.000199558	0.00229537	0.31622	CG12766
FBgn0030731	-0.227184	11.0451	-5.28501	0.00020035	0.00230139	0.312096	CG3415
FBgn0030854	0.19922	9.42252	5.28472	0.000200446	0.00230139	0.311595	CG8289
FBgn0086902	0.171741	10.3929	5.27939	0.000202186	0.00231926	0.302599	kis
FBgn0031970	-0.291193	8.57512	-5.27824	0.000202564	0.00232148	0.300652	CG7227
FBgn0250785	0.209295	9.32599	5.27607	0.000203278	0.00232755	0.29699	vari
FBgn0020764	0.184133	11.3929	5.27083	0.000205014	0.0023453	0.288138	Alas
FBgn0086778	0.294381	7.8278	5.26954	0.000205446	0.00234811	0.285947	gfA
FBgn0031820	0.20674	9.10505	5.26522	0.000206891	0.00236249	0.278651	DLP
FBgn0259222	0.150512	8.58206	5.26291	0.000207672	0.00236926	0.274731	CG42322
FBgn0004580	0.215837	11.5084	5.2583	0.000209233	0.00238491	0.266935	Cbp53E
FBgn0024248	0.17336	9.76627	5.25742	0.000209532	0.00238617	0.265446	chico
FBgn0086683	0.176312	9.17369	5.25385	0.00021075	0.00239788	0.259413	Spf45
FBgn0038037	0.225445	11.5792	5.25009	0.000212044	0.00241042	0.253043	Cyp9f2
FBgn0051454	-0.187569	7.00149	-5.24903	0.000212412	0.00241243	0.251239	CG31454
FBgn0027534	0.181103	7.62611	5.24752	0.000212932	0.00241461	0.248691	Sap130
FBgn0037878	0.164119	8.61595	5.24737	0.000212987	0.00241461	0.248426	CG6693
FBgn0027589	0.171819	8.33776	5.24502	0.000213803	0.00242162	0.244445	CG1688
FBgn0036196	0.219557	9.01502	5.24448	0.000213988	0.00242162	0.243542	CG11658
FBgn0052264	0.256144	10.1364	5.24033	0.000215439	0.00243585	0.236513	CG32264
FBgn0037906	-0.179043	7.58649	-5.23519	0.000217252	0.00245415	0.227788	PGRP-LB
FBgn0003118	-0.193175	6.73557	-5.23455	0.000217479	0.00245451	0.226703	pnt
FBgn0001078	0.271372	7.54096	5.22921	0.000219379	0.00247375	0.217648	ftz-f1
FBgn0031753	0.186142	7.33028	5.22863	0.000219586	0.00247387	0.216666	CG13999
FBgn0011746	0.221808	8.92203	5.22583	0.00022059	0.00248076	0.211919	ana
FBgn0035178	0.239976	7.69208	5.22593	0.000220555	0.00248076	0.212086	CG13908
FBgn0033880	-0.237004	7.51944	-5.22407	0.000221223	0.00248565	0.20894	CG6553
FBgn0039283	0.145056	7.61786	5.22254	0.000221778	0.00248968	0.20633	danr
FBgn0015623	-0.209715	11.5237	-5.22075	0.000222425	0.00249472	0.203298	Cpr
FBgn0002521	0.171893	10.4425	5.21853	0.000223233	0.00250155	0.199528	pho
FBgn0051248	0.165534	10.7375	5.21674	0.000223884	0.00250662	0.196498	CG31248
FBgn0003388	-0.21204	6.74997	-5.21118	0.000225926	0.00252724	0.18705	shd
FBgn0004132	-0.17722	9.30427	-5.20946	0.000226563	0.00252764	0.184121	boca
FBgn0027499	0.171691	8.46705	5.21003	0.000226349	0.00252764	0.185101	wde
FBgn0032283	-0.253022	9.99891	-5.20995	0.000226379	0.00252764	0.184964	CG7296
FBgn0000459	-0.185638	9.59445	-5.20732	0.000227353	0.00253423	0.180496	disco
FBgn0016792	0.152861	7.56864	5.20482	0.000228284	0.00254236	0.176245	dmt
FBgn0050104	-0.178359	8.76841	-5.19989	0.000230131	0.00256066	0.16786	CG30104
FBgn0025117	0.150494	11.3932	5.19315	0.000232678	0.00258672	0.156408	und
FBgn0025634	0.159644	8.32265	5.18952	0.000234065	0.00259985	0.150225	CG13367
FBgn0259139	0.152082	10.4757	5.18699	0.000235034	0.00260832	0.145928	glo
FBgn0038424	0.187454	8.65273	5.1862	0.000235338	0.0026094	0.144582	CG17565
FBgn0036134	0.196153	9.29734	5.17683	0.000238977	0.00264742	0.12862	fd68A
FBgn0086611	-0.20299	6.52268	-5.17586	0.000239354	0.00264928	0.126979	Lcp65Ag3
FBgn0001227	-0.238793	7.21579	-5.17141	0.000241106	0.00265933	0.119395	Hsp67Ba
FBgn0003507	-0.228436	9.30319	-5.1718	0.000240953	0.00265933	0.120053	srp
FBgn0016031	-0.205118	9.89755	-5.17283	0.000240545	0.00265933	0.121818	lama
FBgn0039061	-0.186455	8.64688	-5.17224	0.000240777	0.00265933	0.120815	Ir
FBgn0035103	0.147253	9.87047	5.16861	0.000242216	0.00266924	0.114616	Vdup1
FBgn0010709	0.159942	8.74692	5.16738	0.000242704	0.00267229	0.112521	Atg6
FBgn0028699	0.200877	9.34839	5.16236	0.000244709	0.0026908	0.103967	Rh50
FBgn0038738	-0.359371	10.7656	-5.1621	0.000244812	0.0026908	0.103526	CG4572
FBgn0002921	0.243409	10.9067	5.15967	0.00024579	0.00269241	0.0993785	Atpalpha
FBgn0029768	0.179405	9.81813	5.16039	0.000245499	0.00269241	0.100611	SPR
FBgn0032281	0.206908	8.71328	5.16103	0.000245243	0.00269241	0.101697	CG17107
FBgn0033980	-0.211114	7.78687	-5.15961	0.000245812	0.00269241	0.0992857	Cyp6a20
FBgn0001083	0.242722	8.70285	5.1569	0.00024691	0.0027012	0.0946523	fw
FBgn0001942	0.26465	13.3751	5.15551	0.00024747	0.0027012	0.092293	eIF-4a
FBgn0004387	0.290788	8.88324	5.15612	0.000247226	0.0027012	0.09332	Klp98A
FBgn0034968	0.146086	11.2122	5.15586	0.000247331	0.0027012	0.0928787	RpL12
FBgn0010905	0.1762	7.73035	5.15309	0.000248455	0.0027096	0.0881639	Spn
FBgn0037921	-0.175952	7.42142	-5.15101	0.000249306	0.00271653	0.0846063	CG6808
FBgn0051201	-0.209209	6.69998	-5.1498	0.000249801	0.00271958	0.0825429	GluRIIE
FBgn0011761	-0.180504	6.78066	-5.14742	0.00025078	0.00272788	0.0784763	dhd
FBgn0052191	-0.224691	9.66638	-5.14673	0.000251064	0.00272862	0.0772992	CG32191
FBgn0040395	0.251403	10.139	5.14561	0.000251526	0.00273128	0.0753886	Unc-76
FBgn0004362	0.218576	8.53995	5.14422	0.000252099	0.0027328	0.0730221	HmgD
FBgn0052432	0.210424	8.36869	5.13993	0.000253881	0.00274976	0.0656956	CG32432
FBgn0039909	0.147227	12.0308	5.13753	0.000254885	0.00275827	0.0615889	CG1970
FBgn0037632	-0.163478	9.9087	-5.1341	0.000256323	0.00277145	0.0557404	Tcp-1eta
FBgn0016794	0.163224	8.76803	5.1317	0.000257339	0.00278005	0.0516268	dos
FBgn0030707	0.178129	8.76748	5.11519	0.000264422	0.00285413	0.0233942	CG8916
FBgn0005586	0.242786	10.7492	5.11288	0.000265429	0.00285766	0.0194431	Rab3
FBgn0260945	0.160094	11.0233	5.11291	0.000265416	0.00285766	0.0194919	Atg1
FBgn0020623	0.177091	9.98715	5.11305	0.000265352	0.00285766	0.0197425	Pal
FBgn0030759	-0.16396	7.80405	-5.11233	0.000265668	0.0028578	0.0185049	CG13014
FBgn0027338	-0.185433	7.6931	-5.10791	0.000267611	0.00287624	0.0109313	Kap-alpha3
FBgn0035830	-0.215892	9.19079	-5.10494	0.00026892	0.00288786	0.00585646	CG8209
FBgn0004057	-0.288619	9.2962	-5.10312	0.000269731	0.0028935	0.00272721	Zw
FBgn0037686	0.176472	13.8888	5.10221	0.000270133	0.0028935	0.00117652	RpL34b
FBgn0038293	0.160665	11.0014	5.10238	0.000270059	0.0028935	0.00146348	CG6904
FBgn0259748	-0.150907	6.65416	-5.10037	0.000270956	0.00289985	-0.00198374	CG42397
FBgn0261041	0.172313	9.80528	5.09952	0.000271332	0.00290141	-0.00342724	stj
FBgn0027575	0.184984	9.20964	5.09898	0.000271575	0.00290155	-0.00435569	GABA-B-R2
FBgn0052694	-0.144267	7.10214	-5.09819	0.000271927	0.00290286	-0.00570495	CG32694
FBgn0036336	-0.154752	8.0236	-5.09511	0.000273313	0.00291519	-0.0109908	ste14
FBgn0003423	0.170249	10.86	5.08983	0.000275704	0.00293325	-0.0200427	slgA
FBgn0024728	0.262719	9.90009	5.08999	0.000275633	0.00293325	-0.0197741	Slip1
FBgn0039164	0.209609	7.959	5.09081	0.000275259	0.00293325	-0.0183632	CG5524
FBgn0039710	0.163465	8.74419	5.08631	0.000277307	0.00294781	-0.0260687	dgt1
FBgn0036345	-0.157882	6.42331	-5.08383	0.000278444	0.00295742	-0.0303246	CG17300
FBgn0036484	0.201097	9.33447	5.08018	0.000280128	0.0029728	-0.036591	CG6859
FBgn0038641	0.187063	10.6032	5.07965	0.000280372	0.00297288	-0.0374954	CG7708
FBgn0020909	-0.156522	8.15066	-5.07704	0.000281583	0.00297351	-0.0419743	Rtc1
FBgn0030272	0.190922	11.9724	5.07756	0.00028134	0.00297351	-0.0410798	CG15201
FBgn0030737	-0.291997	12.1815	-5.07834	0.000280978	0.00297351	-0.039742	CG9914
FBgn0037902	0.162928	8.83874	5.07699	0.000281609	0.00297351	-0.0420727	CG5281
FBgn0039137	0.202535	7.7768	5.07731	0.000281458	0.00297351	-0.0415135	CG13604
FBgn0033609	0.236968	9.03193	5.07407	0.000282967	0.00298535	-0.0470705	fbl6
FBgn0000044	0.145972	13.7124	5.07355	0.00028321	0.00298542	-0.0479636	Act57B
FBgn0033608	-0.1645	10.6368	-5.07264	0.000283637	0.00298742	-0.0495285	CG13220
FBgn0004907	0.235809	11.0256	5.07096	0.000284426	0.0029922	-0.0524175	14-3-3zeta
FBgn0051477	-0.147003	7.21453	-5.07066	0.000284565	0.0029922	-0.0529254	CG31477
FBgn0028471	0.164131	9.37622	5.06793	0.000285851	0.00300322	-0.0576116	CG5720
FBgn0029980	-0.200905	9.10023	-5.06668	0.000286445	0.00300696	-0.0597685	CG10778
FBgn0038832	-0.284004	8.99366	-5.06565	0.000286931	0.00300956	-0.061531	CG15695
FBgn0033983	0.168673	8.59618	5.06482	0.000287326	0.00301119	-0.0629591	CG10253
FBgn0040505	0.355935	8.86529	5.06426	0.000287594	0.0030115	-0.0639289	Alk
FBgn0032453	-0.188155	11.6901	-5.06314	0.000288124	0.00301455	-0.0658434	CG6180
FBgn0004516	0.219104	11.9493	5.06153	0.000288893	0.00302009	-0.0686129	Gad1
FBgn0086656	0.163935	11.4585	5.06066	0.000289311	0.00302196	-0.0701151	shrb
FBgn0011481	0.161341	9.37741	5.05865	0.000290271	0.00302198	-0.0735582	Ssdp
FBgn0262169	-0.258701	9.64595	-5.0587	0.000290249	0.00302198	-0.0734798	magu
FBgn0033872	0.237101	10.3344	5.05996	0.000289641	0.00302198	-0.071302	CG6329
FBgn0051119	0.186265	8.02876	5.05944	0.000289895	0.00302198	-0.0722114	HdacX
FBgn0010241	-0.139743	6.4388	-5.05226	0.000293355	0.00305157	-0.0845418	Mdr50
FBgn0086679	-0.149781	9.67831	-5.0508	0.000294065	0.00305644	-0.0870549	p
FBgn0014455	-0.223904	11.2875	-5.04944	0.000294727	0.0030608	-0.0893916	Ahcy13
FBgn0037917	0.240354	9.98322	5.0417	0.000298527	0.00309719	-0.102704	wkd
FBgn0039555	0.220941	9.08015	5.04131	0.000298722	0.00309719	-0.103383	mRpS22
FBgn0036750	-0.340551	8.37087	-5.04029	0.000299228	0.00309989	-0.105141	CG6034
FBgn0262477	0.185936	8.35253	5.03895	0.00029989	0.00310419	-0.107435	fd85E
FBgn0085466	0.181876	6.71793	5.03065	0.000304046	0.00314463	-0.121735	CG34437
FBgn0035359	-0.212532	8.43195	-5.02371	0.000307565	0.00317842	-0.13369	CG1143
FBgn0040532	0.21755	12.8397	5.02285	0.000308004	0.00318035	-0.135172	CG8369
FBgn0040798	-0.252522	8.02968	-5.01463	0.000312232	0.00321874	-0.149336	CG13069
FBgn0050055	0.155454	9.02731	5.01486	0.000312113	0.00321874	-0.148943	CR30055
FBgn0020300	-0.201051	8.33681	-5.01214	0.000313525	0.00322944	-0.153631	gk
FBgn0015279	0.144749	9.5006	5.01041	0.000314426	0.00323608	-0.156613	Pi3K92E
FBgn0086348	-0.493353	10.7326	-5.00669	0.000316374	0.00325347	-0.163028	se
FBgn0010342	0.150951	8.26648	5.00417	0.000317701	0.00326446	-0.167376	Map60
FBgn0015570	-0.18764	10.9194	-5.00038	0.000319709	0.00328186	-0.173918	alpha-Est2
FBgn0031174	0.157431	9.14093	4.99999	0.000319915	0.00328186	-0.174589	CG1486
FBgn0004117	0.239648	10.8225	4.99669	0.000321677	0.00329457	-0.180293	Tm2
FBgn0030321	-0.161494	9.61	-4.99636	0.000321855	0.00329457	-0.180869	CG1703
FBgn0033657	0.16879	8.73214	4.99555	0.000322289	0.00329457	-0.182268	Sln
FBgn0035437	0.186608	8.98726	4.99552	0.000322303	0.00329457	-0.182315	CG11526
FBgn0085453	-0.383256	11.5122	-4.99523	0.000322459	0.00329457	-0.182817	CG34424
FBgn0034136	0.170259	7.39216	4.99415	0.000323038	0.00329671	-0.184678	DAT
FBgn0036039	0.179629	9.07789	4.99386	0.000323191	0.00329671	-0.185172	CG18177
FBgn0038389	-0.157061	8.36434	-4.99085	0.000324813	0.00331023	-0.19037	CG5516
FBgn0038926	0.184586	8.5632	4.99043	0.000325041	0.00331023	-0.1911	CG13409
FBgn0086758	0.14171	7.12619	4.98632	0.000327271	0.00333025	-0.198201	chinmo
FBgn0027586	-0.253507	12.5171	-4.97864	0.000331484	0.00336768	-0.211484	CG5867
FBgn0260874	0.208687	7.56269	4.97908	0.00033124	0.00336768	-0.210718	Ir76a
FBgn0259219	0.156517	8.17013	4.97753	0.000332096	0.00337119	-0.2134	CG42319
FBgn0038730	0.192942	7.70752	4.97494	0.000333529	0.00338281	-0.217872	CG6300
FBgn0053054	0.185742	8.61882	4.9745	0.000333777	0.00338281	-0.218643	CG33054
FBgn0031061	0.16283	8.70929	4.97184	0.000335257	0.00339508	-0.223236	CG14232
FBgn0037960	-0.165361	7.86952	-4.96976	0.000336422	0.00340415	-0.226841	mthl5
FBgn0033942	-0.170561	8.91712	-4.96285	0.000340317	0.00343805	-0.238794	Cpr51A
FBgn0034716	0.16374	8.92922	4.96308	0.000340185	0.00343805	-0.238392	Oatp58Dc
FBgn0053147	0.22567	8.99069	4.96067	0.000341558	0.00344782	-0.242572	Hs3st-A
FBgn0000042	0.350809	10.401	4.95637	0.000344013	0.00346983	-0.25001	Act5C
FBgn0028487	0.217924	9.13964	4.95365	0.00034558	0.00348285	-0.254726	f-cup
FBgn0035900	0.147362	7.98324	4.94744	0.000349177	0.0035163	-0.265479	ZC3H3
FBgn0002774	0.214323	8.65956	4.94429	0.000351016	0.00352982	-0.270932	mle
FBgn0029762	-0.265994	8.67136	-4.94418	0.00035108	0.00352982	-0.271121	NAAT1
FBgn0020647	0.189431	9.23285	4.93826	0.000354568	0.00356205	-0.281384	KrT95D
FBgn0004896	0.230977	7.75679	4.93571	0.000356087	0.00357162	-0.285821	fd59A
FBgn0029898	-0.287289	8.98167	-4.93609	0.000355857	0.00357162	-0.285152	CG14439
FBgn0010488	0.184885	10.7496	4.93263	0.000357922	0.00358149	-0.291157	NAT1
FBgn0036607	-0.241612	8.37088	-4.93283	0.000357802	0.00358149	-0.290809	CG13059
FBgn0024189	0.160147	7.75279	4.92972	0.000359664	0.00359607	-0.296198	sns
FBgn0004584	-0.184943	7.95622	-4.92751	0.000360999	0.00360656	-0.300042	Rrp1
FBgn0034382	0.23749	6.474	4.91938	0.000365939	0.00365302	-0.314149	CG18609
FBgn0032979	0.149931	9.17866	4.91692	0.000367446	0.00366512	-0.318417	CG1832
FBgn0051814	0.173816	6.75015	4.91646	0.000367732	0.00366512	-0.319222	CG31814
FBgn0026375	0.178745	9.74562	4.91563	0.000368245	0.00366734	-0.320671	RhoGAPp190
FBgn0032042	0.224133	8.62699	4.91352	0.000369546	0.00367712	-0.324332	CG13398
FBgn0033744	0.178477	7.46065	4.91309	0.00036981	0.00367712	-0.325073	CG12370
FBgn0001098	0.142649	12.5568	4.91044	0.000371456	0.00369058	-0.329682	Gdh
FBgn0063649	0.160324	7.79644	4.90721	0.000373469	0.00370765	-0.335289	CG6006
FBgn0031694	-0.231582	8.57163	-4.90488	0.000374931	0.0037182	-0.339345	Cyp4ac2
FBgn0039357	0.206086	7.93184	4.90458	0.000375121	0.0037182	-0.339869	CG4743
FBgn0028988	-0.199217	11.0369	-4.90057	0.000377646	0.00374029	-0.346832	Spn1
FBgn0051102	-0.156994	8.58965	-4.89932	0.000378441	0.00374523	-0.349014	CG31102
FBgn0037680	0.162288	9.17288	4.89827	0.000379103	0.00374884	-0.350829	CG8121
FBgn0052843	0.147479	7.75157	4.89491	0.000381247	0.00376709	-0.35668	Dh31-R1
FBgn0000406	-0.181012	13.5375	-4.89122	0.000383612	0.00378686	-0.363098	Cyt-b5-r
FBgn0020278	-0.196477	9.46328	-4.89039	0.000384149	0.00378686	-0.364547	loco
FBgn0028396	0.505777	11.6527	4.89054	0.000384051	0.00378686	-0.364284	TotA
FBgn0042206	-0.198046	7.87755	-4.88676	0.000386489	0.00380696	-0.37085	GstD10
FBgn0045842	0.153673	7.70259	4.88384	0.000388388	0.00382269	-0.375936	yuri
FBgn0034046	0.267842	8.50088	4.88326	0.000388769	0.00382345	-0.376954	tun
FBgn0034534	0.181665	10.9243	4.8808	0.000390378	0.0038333	-0.381239	maf-S
FBgn0039089	0.292551	7.94714	4.88111	0.000390172	0.0038333	-0.38069	beat-IV
FBgn0032221	0.166628	8.98951	4.87994	0.000390936	0.0038358	-0.382721	CG5375
FBgn0030317	0.160854	12.0834	4.87671	0.000393067	0.00385371	-0.38836	CG1561
FBgn0262057	-0.168253	10.5905	-4.87537	0.000393953	0.00385939	-0.390696	Spn77Ba
FBgn0052549	-0.161141	11.7581	-4.87075	0.000397019	0.00388641	-0.398737	CG32549
FBgn0026593	-0.177938	11.0964	-4.86992	0.000397573	0.00388882	-0.400186	CG5707
FBgn0004618	0.163531	8.93504	4.86774	0.000399034	0.00390008	-0.40399	gl
FBgn0030634	0.160203	8.76688	4.86417	0.000401431	0.00391745	-0.410204	CG9164
FBgn0262003	-0.291941	6.81961	-4.86463	0.000401121	0.00391745	-0.409402	CG42821
FBgn0262004	-0.291941	6.81961	-4.86463	0.000401121	0.00391745	-0.409402	CG42822
FBgn0003162	-0.328998	11.0872	-4.85912	0.000404852	0.00394169	-0.419007	Pu
FBgn0036302	0.137506	7.46485	4.85949	0.000404603	0.00394169	-0.418367	sowah
FBgn0038938	0.191219	9.21923	4.85775	0.000405787	0.00394774	-0.421398	CG7084
FBgn0032382	0.437304	10.8995	4.85348	0.00040871	0.00397311	-0.428843	CG14935
FBgn0036801	0.167546	8.55598	4.85189	0.000409803	0.00398067	-0.431614	MYPT-75D
FBgn0087012	0.145774	8.90141	4.84876	0.000411972	0.00399867	-0.43709	5-HT2
FBgn0030893	-0.175484	7.62361	-4.84543	0.000414282	0.004018	-0.44289	RhoGAP16F
FBgn0052441	0.170374	10.8551	4.84328	0.000415789	0.00402952	-0.446655	CG32441
FBgn0262579	0.266028	7.25224	4.8423	0.000416473	0.00403305	-0.44836	Ect4
FBgn0036746	0.278922	9.08344	4.84097	0.000417409	0.00403901	-0.450687	TORC
FBgn0036030	0.243836	10.9719	4.83927	0.000418601	0.00404744	-0.453645	CG6767
FBgn0011674	-0.171986	7.27523	-4.83788	0.000419584	0.00405074	-0.456078	insc
FBgn0039051	-0.272333	7.01398	-4.83827	0.00041931	0.00405074	-0.455401	CG17109
FBgn0027565	0.156595	8.69976	4.83454	0.000421954	0.00406657	-0.461919	CG5498
FBgn0035488	0.184927	10.0823	4.8342	0.000422191	0.00406657	-0.4625	CG11593
FBgn0052112	0.152199	8.6502	4.83323	0.000422886	0.00407016	-0.464207	CG32112
FBgn0028645	0.162668	8.66675	4.83119	0.000424337	0.00408101	-0.467759	beat-Ib
FBgn0039668	0.145584	8.84526	4.8303	0.000424977	0.00408405	-0.469321	Trc8
FBgn0030467	0.160295	8.67235	4.82797	0.000426649	0.00409389	-0.473394	CG1764
FBgn0259682	0.227695	11.5394	4.82808	0.000426568	0.00409389	-0.473197	CG42351
FBgn0038974	-0.187408	8.15591	-4.82741	0.000427053	0.00409465	-0.474375	CG5377
FBgn0031306	0.208879	9.55597	4.82291	0.000430301	0.00412266	-0.482233	CG4577
FBgn0010772	0.184921	10.4282	4.81871	0.000433359	0.0041488	-0.489574	Xe7
FBgn0034860	-0.203331	12.1606	-4.81653	0.000434957	0.00416095	-0.493391	CG9812
FBgn0035047	0.179434	7.89992	4.81582	0.000435482	0.00416282	-0.494643	Pof
FBgn0037702	0.152119	9.06245	4.81345	0.000437224	0.0041763	-0.49878	CG8176
FBgn0032021	0.248797	10.2132	4.81233	0.000438049	0.00418102	-0.500736	CG7781
FBgn0033739	0.239022	9.2716	4.81017	0.00043965	0.00419312	-0.504517	Dyb
FBgn0035400	0.241203	9.50704	4.80733	0.000441762	0.00420752	-0.509486	CG11537
FBgn0040796	-0.195395	7.34848	-4.80725	0.000441827	0.00420752	-0.509638	CG13064
FBgn0028421	0.160228	10.0744	4.8065	0.000442381	0.00420963	-0.510938	Kap3
FBgn0003390	0.175012	8.35524	4.80538	0.000443223	0.00421128	-0.512908	shf
FBgn0010389	0.197089	8.65642	4.80024	0.000447083	0.00423521	-0.521899	htl
FBgn0011288	0.234848	12.3175	4.80075	0.000446697	0.00423521	-0.521002	Snap25
FBgn0033603	-0.228798	7.43468	-4.80156	0.000446087	0.00423521	-0.519587	Cpr47Ef
FBgn0034438	-0.220384	8.08056	-4.8004	0.000446964	0.00423521	-0.521623	CG9416
FBgn0261439	0.167458	11.8602	4.79785	0.000448894	0.00424917	-0.526089	SdhA
FBgn0033402	-0.187847	8.51322	-4.79461	0.000451361	0.00426932	-0.53177	Myd88
FBgn0031275	0.141184	8.70998	4.79186	0.000453462	0.00428369	-0.536585	GABA-B-R3
FBgn0034405	-0.181303	12.1322	-4.79173	0.000453559	0.00428369	-0.536806	Jheh2
FBgn0040531	-0.32537	9.51525	-4.78963	0.000455176	0.00429575	-0.540496	CG11741
FBgn0037539	0.171611	7.89186	4.78577	0.000458153	0.00432061	-0.547252	CG10435
FBgn0038693	0.1837	9.77119	4.7848	0.000458907	0.00432126	-0.548956	unc79
FBgn0243513	0.153093	7.77168	4.7849	0.00045883	0.00432126	-0.548784	cnir
FBgn0028647	0.155726	7.84056	4.7799	0.000462727	0.00433857	-0.557548	CG11902
FBgn0030087	0.180286	11.3735	4.77962	0.000462948	0.00433857	-0.558043	CG7766
FBgn0034471	-0.188425	13.8668	-4.78101	0.000461857	0.00433857	-0.555598	Obp56e
FBgn0035044	-0.20276	9.5632	-4.77996	0.00046268	0.00433857	-0.557444	CG3663
FBgn0036059	0.166733	10.1977	4.78025	0.000462454	0.00433857	-0.556938	nudE
FBgn0039816	0.141969	8.51852	4.7797	0.000462884	0.00433857	-0.557901	CG11317
FBgn0028670	-0.188005	10.3165	-4.77674	0.000465205	0.00435457	-0.563085	Vha100-2
FBgn0262110	0.146077	9.28373	4.77486	0.000466691	0.00436524	-0.56639	CG42863
FBgn0034162	-0.17791	12.7902	-4.77312	0.000468066	0.00437485	-0.569438	CG6426
FBgn0005674	-0.165137	10.2503	-4.77172	0.000469172	0.00438195	-0.571885	Aats-glupro
FBgn0040079	0.150184	9.47326	4.76925	0.000471141	0.00439708	-0.576224	pkaap
FBgn0039936	0.144036	10.7217	4.76798	0.000472153	0.00440327	-0.578448	CG11148
FBgn0015040	-0.31002	9.23613	-4.7662	0.000473581	0.00441007	-0.581578	Cyp9c1
FBgn0031143	-0.179683	9.37892	-4.76653	0.000473318	0.00441007	-0.581003	CG1532
FBgn0027529	0.142341	8.2003	4.75587	0.000481944	0.00448464	-0.599716	CG8920
FBgn0047114	-0.197321	7.93908	-4.75443	0.000483123	0.0044923	-0.602249	CG31142
FBgn0034618	0.300851	9.94928	4.75348	0.000483898	0.00449618	-0.603908	CG9485
FBgn0032800	0.237245	7.9572	4.75253	0.000484682	0.00450016	-0.605586	CG10137
FBgn0030178	-0.138974	8.79843	-4.75081	0.000486098	0.00450985	-0.60861	CG2974
FBgn0035379	0.188663	7.5801	4.74996	0.000486797	0.00450985	-0.610099	spz5
FBgn0037646	-0.191483	9.62517	-4.74833	0.000488149	0.00451904	-0.612971	CG11967
FBgn0030364	0.155983	10.0205	4.74756	0.000488783	0.0045216	-0.614316	CG15735
FBgn0040299	-0.143328	7.07526	-4.74582	0.000490232	0.00453168	-0.617384	Myo28B1
FBgn0013753	0.208784	8.5012	4.74447	0.000491353	0.0045354	-0.619749	Bgb
FBgn0046225	0.155671	8.77048	4.74339	0.00049225	0.00454036	-0.62164	CG17230
FBgn0037084	0.148208	10.0164	4.7419	0.000493498	0.00454855	-0.624263	Syx6
FBgn0000326	-0.169768	8.5058	-4.74045	0.000494713	0.00455641	-0.626809	clt
FBgn0004102	0.156761	7.91437	4.73833	0.000496503	0.00456957	-0.630552	oc
FBgn0004242	0.22868	10.4205	4.73693	0.00049768	0.00457706	-0.633004	Syt1
FBgn0031908	-0.165924	9.99099	-4.7352	0.000499145	0.00458719	-0.63605	CG5177
FBgn0000633	0.18463	8.67124	4.73441	0.000499817	0.00459002	-0.637443	fas
FBgn0033320	-0.169548	10.9586	-4.73176	0.000502069	0.00460735	-0.6421	CG8586
FBgn0020249	0.133225	10.9869	4.73003	0.000503546	0.0046142	-0.645144	stck
FBgn0052225	0.195204	8.6912	4.73007	0.000503514	0.0046142	-0.645078	CG32225
FBgn0024293	-0.135925	12.9371	-4.7266	0.000506492	0.00463782	-0.651186	Spn43Ab
FBgn0039136	0.144227	9.60786	4.7218	0.000510639	0.00467129	-0.659633	CG5902
FBgn0039690	0.151976	9.12519	4.72139	0.000510998	0.00467129	-0.66036	CG1969
FBgn0050377	-0.171562	7.18242	-4.72109	0.000511258	0.00467129	-0.660887	CG30377
FBgn0035091	-0.166154	10.772	-4.72046	0.000511802	0.00467288	-0.66199	CG3829
FBgn0037417	-0.148007	6.62451	-4.7183	0.000513681	0.00468664	-0.665784	Osi10
FBgn0035999	0.263544	8.11686	4.71462	0.000516911	0.0047127	-0.672276	CG3552
FBgn0260938	0.198035	9.25531	4.71418	0.000517295	0.0047128	-0.673046	tay
FBgn0032744	0.199958	8.27202	4.71343	0.000517959	0.00471544	-0.674374	CG15173
FBgn0259209	0.12793	7.3494	4.71299	0.000518343	0.00471554	-0.675141	Mlp60A
FBgn0004575	0.262402	11.1682	4.71191	0.000519297	0.00472082	-0.677047	Syn
FBgn0001137	-0.150255	8.63179	-4.71116	0.000519957	0.00472341	-0.678362	grk
FBgn0058204	-0.145142	6.34094	-4.70811	0.000522663	0.00474458	-0.683737	CG40204
FBgn0050076	-0.150517	7.01054	-4.70465	0.000525751	0.00476917	-0.689837	CG30076
FBgn0037930	-0.233644	9.29279	-4.7011	0.000528942	0.00479467	-0.696103	CG14715
FBgn0033250	0.156936	11.4959	4.6983	0.000531463	0.00481407	-0.701027	CG14762
FBgn0029837	0.166562	9.57339	4.69523	0.00053425	0.00483585	-0.706444	Tsp5D
FBgn0037617	0.155334	8.22021	4.69335	0.000535965	0.00484789	-0.709763	CG8145
FBgn0032702	0.148844	9.42108	4.69139	0.000537756	0.00485713	-0.713217	CG10376
FBgn0038105	-0.303913	9.50087	-4.69146	0.000537698	0.00485713	-0.713104	yellow-f2
FBgn0033639	0.267261	8.8922	4.69008	0.000538963	0.00486273	-0.715537	CG9003
FBgn0051548	-0.17391	10.1959	-4.68988	0.000539147	0.00486273	-0.715891	CG31548
FBgn0028888	0.166963	8.3106	4.68849	0.000540423	0.00487075	-0.718338	CG4168
FBgn0030870	0.167997	9.04818	4.68794	0.000540932	0.00487186	-0.719314	CG6398
FBgn0034421	0.190338	9.10489	4.6815	0.000546899	0.00492209	-0.730671	hppy
FBgn0011802	0.156571	7.0829	4.68101	0.000547353	0.00492267	-0.731531	Gem3
FBgn0001250	-0.16566	9.64893	-4.68042	0.000547912	0.00492418	-0.732587	if
FBgn0050285	0.130299	10.8378	4.67972	0.000548566	0.00492598	-0.733822	CG30285
FBgn0052177	0.168163	9.42732	4.67937	0.000548892	0.00492598	-0.734438	CG32177
FBgn0033174	0.17368	7.30052	4.67595	0.000552099	0.00494772	-0.740469	CG11125
FBgn0087005	0.147608	11.9283	4.67598	0.000552071	0.00494772	-0.740416	rtp
FBgn0020493	0.226257	9.89856	4.67501	0.000552988	0.00494866	-0.742135	Dad
FBgn0027508	0.157832	9.29232	4.67503	0.000552967	0.00494866	-0.742095	tankyrase
FBgn0024806	0.136735	9.60183	4.67448	0.000553489	0.00494963	-0.743072	DIP2
FBgn0036545	0.190867	8.68828	4.67288	0.000555	0.00495962	-0.745894	GXIVsPLA2
FBgn0041707	0.143376	12.2843	4.67135	0.00055645	0.00496906	-0.748594	7B2
FBgn0015789	0.147722	10.3212	4.67044	0.000557314	0.00496974	-0.750201	Rab10
FBgn0031374	0.176697	9.57953	4.67051	0.000557254	0.00496974	-0.75009	CG7337
FBgn0051534	0.145782	10.204	4.66831	0.000559349	0.00498437	-0.753974	CG31534
FBgn0032666	0.339427	10.0077	4.65874	0.000568557	0.00506285	-0.770875	CG5758
FBgn0028664	0.16568	9.49276	4.65307	0.000574093	0.00510854	-0.780903	VhaM9.7-c
FBgn0032401	0.193978	7.73735	4.65109	0.000576041	0.00512226	-0.78441	CG6792
FBgn0261445	0.226228	9.27176	4.64915	0.000577952	0.00513563	-0.787836	sgl
FBgn0030718	0.141449	11.8498	4.64774	0.000579348	0.00514442	-0.790334	CG9172
FBgn0037109	0.155295	8.16769	4.6455	0.000581569	0.00516051	-0.794294	MED1
FBgn0038271	0.13727	12.492	4.64465	0.000582422	0.00516444	-0.79581	CG3731
FBgn0036489	-0.142934	8.36379	-4.64399	0.000583081	0.00516666	-0.796981	CG7011
FBgn0032048	0.214406	9.06987	4.64299	0.000584072	0.00517181	-0.798738	Dh31
FBgn0033650	-0.162931	6.85393	-4.63907	0.000588009	0.00519937	-0.805689	CG13193
FBgn0041723	0.156582	8.85708	4.63916	0.000587914	0.00519937	-0.805522	rho-5
FBgn0053296	0.271435	7.65124	4.6372	0.000589885	0.00521231	-0.808986	CG33296
FBgn0029929	-0.149442	8.21031	-4.63487	0.000592244	0.00522949	-0.813116	CG4593
FBgn0050418	0.196094	8.20434	4.63339	0.000593746	0.00523908	-0.815736	nord
FBgn0011642	0.131308	10.4913	4.6326	0.00059455	0.00524251	-0.817136	Zyx102EF
FBgn0023416	0.168227	8.73741	4.63198	0.000595183	0.00524443	-0.818238	Ac3
FBgn0062412	-0.157462	6.46436	-4.62758	0.00059968	0.00528036	-0.826025	Ctr1B
FBgn0038912	-0.140444	9.20636	-4.62662	0.000600672	0.00528541	-0.827735	CG6656
FBgn0027596	0.14384	9.44434	4.62146	0.000605996	0.00532562	-0.836864	CG10249
FBgn0033240	0.153136	7.68224	4.62138	0.000606086	0.00532562	-0.837019	CG2906
FBgn0039040	0.13189	10.6754	4.61861	0.000608964	0.00534719	-0.84192	CG13833
FBgn0030806	0.159812	7.21024	4.61654	0.000611128	0.00536245	-0.845589	CG13001
FBgn0038761	-0.271976	8.22956	-4.616	0.0006117	0.00536374	-0.846557	CG17190
FBgn0030186	-0.157987	7.00772	-4.61322	0.000614617	0.00538558	-0.851479	CG2962
FBgn0003117	-0.179785	7.30484	-4.61102	0.000616944	0.00540222	-0.855388	pnr
FBgn0028743	0.230855	8.45661	4.60444	0.000623936	0.00545966	-0.867045	CG5036
FBgn0000163	0.191149	7.63868	4.60077	0.000627877	0.00547516	-0.873558	baz
FBgn0010894	0.13671	9.49275	4.60145	0.000627149	0.00547516	-0.872358	sinu
FBgn0028940	0.146286	10.8685	4.60113	0.000627492	0.00547516	-0.872924	Cyp28a5
FBgn0030575	0.249595	10.6529	4.601	0.000627631	0.00547516	-0.873152	CG5321
FBgn0063491	-0.294142	12.9265	-4.60116	0.000627466	0.00547516	-0.872879	GstE9
FBgn0040396	-0.19573	10.152	-4.59583	0.000633228	0.005518	-0.882334	CG3939
FBgn0020309	0.173097	9.70526	4.5954	0.000633697	0.00551828	-0.8831	crol
FBgn0261972	0.15841	7.83748	4.59277	0.000636559	0.00553938	-0.88776	gpp
FBgn0051036	0.191039	7.08601	4.5909	0.000638613	0.00555343	-0.891093	CG31036
FBgn0010309	0.190496	8.35133	4.58997	0.000639634	0.00555847	-0.892744	pigeon
FBgn0033108	0.228488	8.18684	4.58904	0.00064065	0.00556347	-0.894386	CG15236
FBgn0032856	-0.234962	7.47077	-4.57917	0.000651601	0.00565468	-0.911912	CG16798
FBgn0034439	0.210057	8.00215	4.57788	0.000653052	0.00566292	-0.914213	CG10062
FBgn0050151	-0.182212	8.88199	-4.57753	0.000653448	0.00566292	-0.914839	CG30151
FBgn0041775	0.191239	9.41172	4.57693	0.000654115	0.00566481	-0.915894	tral
FBgn0035569	-0.124361	6.38016	-4.57629	0.000654835	0.00566715	-0.917031	CG15876
FBgn0023549	-0.20819	8.01126	-4.5746	0.000656743	0.00567621	-0.920039	Mct1
FBgn0037120	0.160517	9.53535	4.57417	0.000657231	0.00567621	-0.920808	CG11247
FBgn0037560	0.152263	9.05086	4.57443	0.000656937	0.00567621	-0.920345	CR18228
FBgn0026238	0.192163	10.469	4.57303	0.000658518	0.00568344	-0.922831	gus
FBgn0000180	0.163849	6.60022	4.56989	0.000662083	0.0057064	-0.928413	bib
FBgn0016687	-0.140174	11.7371	-4.56867	0.000663476	0.0057145	-0.930586	Nurf-38
FBgn0037234	0.143335	9.3866	4.56748	0.000664832	0.00572227	-0.932697	CG9795
FBgn0031740	0.143963	8.17178	4.56487	0.000667822	0.00574348	-0.937336	CG7239
FBgn0261089	0.276158	7.80509	4.56454	0.000668207	0.00574348	-0.937931	Sytalpha
FBgn0037709	-0.214048	8.54931	-4.56209	0.000671023	0.00576377	-0.94228	CG8199
FBgn0032305	0.182459	11.5508	4.55702	0.000676914	0.00580692	-0.951315	CG6700
FBgn0040900	0.152664	7.70675	4.55697	0.000676968	0.00580692	-0.951397	CG17777
FBgn0039656	-0.174953	8.32565	-4.55619	0.000677873	0.00581073	-0.952778	CG11951
FBgn0261397	0.169201	10.1883	4.55035	0.000684733	0.00586556	-0.963187	didum
FBgn0032035	-0.153046	10.3837	-4.54913	0.000686167	0.00587385	-0.965349	CG13393
FBgn0025683	-0.132694	12.8664	-4.54865	0.00068674	0.00587477	-0.966212	CG3164
FBgn0032495	-0.198823	8.45705	-4.54639	0.000689412	0.00589363	-0.970225	CG16820
FBgn0029930	0.139674	7.09376	4.54573	0.000690198	0.00589636	-0.971403	CG12541
FBgn0030734	-0.130326	10.2655	-4.5409	0.000695971	0.00594165	-0.980013	CG9911
FBgn0034282	0.347819	9.15355	4.53843	0.000698942	0.00596298	-0.984415	Mapmodulin
FBgn0031526	-0.191543	7.39821	-4.53708	0.000700569	0.00597282	-0.986817	CG8838
FBgn0261933	-0.137358	8.59253	-4.53656	0.00070119	0.00597408	-0.987734	SmD1
FBgn0050172	0.173008	10.1292	4.53603	0.000701833	0.00597553	-0.988681	CG30172
FBgn0005630	0.148803	7.78215	4.53528	0.000702743	0.00597924	-0.99002	lola
FBgn0040660	-0.153397	9.60972	-4.53263	0.000705967	0.00600262	-0.99475	CG13551
FBgn0259240	0.126489	7.29245	4.52934	0.000709978	0.00603266	-1.0006	Ten-a
FBgn0003719	0.17779	6.98616	4.52639	0.000713608	0.00605943	-1.00587	tld
FBgn0030485	0.13888	9.93702	4.52485	0.000715507	0.00606618	-1.00862	CG1998
FBgn0036998	-0.156789	9.4477	-4.52457	0.000715846	0.00606618	-1.00911	CG5969
FBgn0039594	-0.162057	10.8412	-4.52483	0.000715522	0.00606618	-1.00864	CG9990
FBgn0027657	-0.130041	12.4579	-4.52414	0.000716382	0.00606665	-1.00988	glob1
FBgn0033029	0.154637	8.8236	4.5232	0.000717545	0.00607242	-1.01156	l(2)NC136
FBgn0052695	0.21242	10.7966	4.52187	0.000719188	0.00608225	-1.01392	CG32695
FBgn0003308	-0.235044	9.2131	-4.52121	0.000720011	0.00608513	-1.0151	ry
FBgn0025878	0.172634	8.55128	4.52065	0.000720712	0.00608521	-1.01611	wrapper
FBgn0035985	0.249234	11.8851	4.52019	0.000721275	0.00608521	-1.01692	Cpr67B
FBgn0050497	-0.285516	9.17607	-4.52004	0.000721467	0.00608521	-1.01719	CG30497
FBgn0037315	0.181317	9.50937	4.51965	0.000721956	0.00608526	-1.01789	Cerk
FBgn0036684	-0.206077	9.13375	-4.51482	0.000727998	0.00613209	-1.0265	CG3764
FBgn0032509	-0.171155	10.5572	-4.5088	0.000735602	0.00619201	-1.03724	CG6523
FBgn0038130	-0.228936	8.30388	-4.50307	0.000742932	0.00624538	-1.04748	CG8630
FBgn0051370	-0.149797	7.81047	-4.49946	0.000747581	0.00628028	-1.05392	CG31370
FBgn0030244	-0.332796	8.15739	-4.49808	0.000749366	0.00629109	-1.05639	CG2157
FBgn0003046	-0.148553	6.99324	-4.49614	0.000751882	0.00630764	-1.05985	Pcp
FBgn0039563	0.158168	7.4434	4.49579	0.000752338	0.00630764	-1.06048	CG4951
FBgn0038246	0.231933	9.41423	4.49522	0.000753074	0.00630962	-1.06149	CG14853
FBgn0027504	0.139465	9.31453	4.49428	0.00075431	0.00631578	-1.06318	CG8878
FBgn0034500	-0.141069	8.88932	-4.49256	0.000756549	0.00633033	-1.06624	CG11200
FBgn0020240	0.155851	10.3251	4.49104	0.000758544	0.00634282	-1.06896	Mcr
FBgn0039889	0.169367	10.3861	4.4899	0.000760047	0.00635117	-1.07101	CG2219
FBgn0032197	0.130949	8.92341	4.48854	0.000761827	0.00636183	-1.07342	CG5694
FBgn0025678	-0.165987	10.1368	-4.48613	0.000765012	0.00638421	-1.07773	CaBP1
FBgn0030261	-0.206938	8.53591	-4.48463	0.000767005	0.00639239	-1.08042	CG15203
FBgn0035480	-0.140981	9.3299	-4.48496	0.000766569	0.00639239	-1.07983	CG14984
FBgn0036558	0.146503	8.75727	4.48071	0.000772223	0.00643162	-1.08742	mib1
FBgn0039338	0.131636	9.53134	4.47839	0.000775328	0.00645322	-1.09156	XNP
FBgn0017430	0.165879	9.08237	4.47756	0.000776446	0.00645827	-1.09305	Nelf-E
FBgn0000181	0.135554	8.98806	4.4755	0.000779223	0.0064771	-1.09674	bic
FBgn0004921	0.203452	11.9904	4.47496	0.000779959	0.00647895	-1.09771	Ggamma1
FBgn0037360	0.16596	9.01361	4.47442	0.000780682	0.00648069	-1.09867	CG2182
FBgn0000964	-0.164553	7.19927	-4.47344	0.00078201	0.00648406	-1.10042	tj
FBgn0037717	0.132552	8.79014	4.47336	0.000782115	0.00648406	-1.10056	CG8301
FBgn0027948	0.141424	10.841	4.47047	0.000786047	0.00650383	-1.10574	msps
FBgn0030105	-0.311229	7.03023	-4.47082	0.000785573	0.00650383	-1.10512	CG15369
FBgn0036725	0.185869	7.52958	4.47102	0.000785301	0.00650383	-1.10476	CG18265
FBgn0086907	-0.177282	7.20658	-4.46431	0.00079448	0.0065693	-1.11676	Cyt-c-d
FBgn0026563	-0.296381	6.9806	-4.46201	0.000797647	0.00659116	-1.12087	CG1979
FBgn0030432	0.205894	10.1326	4.46011	0.000800291	0.00660868	-1.12428	CG4404
FBgn0262109	0.422936	11.2479	4.45966	0.000800911	0.00660948	-1.12508	CR42862
FBgn0031548	-0.19178	7.36454	-4.45659	0.000805189	0.00662935	-1.13058	CG8852
FBgn0032721	-0.135495	10.0008	-4.45642	0.000805421	0.00662935	-1.13088	CG10602
FBgn0039671	-0.156112	6.49162	-4.45714	0.00080442	0.00662935	-1.1296	CG11470
FBgn0050421	0.214	9.2531	4.45667	0.000805076	0.00662935	-1.13044	CG30421
FBgn0023458	0.321476	9.26546	4.45363	0.000809324	0.00665714	-1.13587	Rbcn-3A
FBgn0002562	-0.234559	6.74306	-4.44998	0.000814472	0.00669274	-1.14241	Lsp1alpha
FBgn0040795	-0.180646	6.60009	-4.44981	0.000814713	0.00669274	-1.14272	CG13038
FBgn0033897	0.151572	8.84169	4.44821	0.000816975	0.00670696	-1.14558	Rcd1
FBgn0033928	-0.147542	7.15427	-4.44322	0.000824087	0.00675972	-1.15453	Arc2
FBgn0034590	0.188426	8.12944	4.44295	0.000824473	0.00675972	-1.15501	Magi
FBgn0036194	-0.13103	8.65944	-4.4425	0.000825108	0.00676053	-1.15581	CG11652
FBgn0051663	0.153601	9.44545	4.4419	0.000825976	0.00676325	-1.15689	CG31663
FBgn0011666	0.152867	7.82612	4.44118	0.000827011	0.00676733	-1.15818	msi
FBgn0031068	-0.129605	9.28384	-4.43764	0.000832099	0.00680455	-1.16452	Alr
FBgn0053547	0.173618	8.3644	4.43669	0.000833479	0.00681142	-1.16622	Rim
FBgn0250848	-0.183723	11.3082	-4.43599	0.000834493	0.0068153	-1.16748	26-29-p
FBgn0031544	-0.160431	9.83526	-4.43316	0.00083861	0.00684449	-1.17256	CG17593
FBgn0085201	0.208227	11.4477	4.4289	0.000844835	0.00689084	-1.18019	CG34172
FBgn0039856	-0.321345	9.46715	-4.42621	0.000848794	0.00691866	-1.18502	CG1774
FBgn0004926	-0.144555	11.0831	-4.42271	0.000853971	0.00695188	-1.19129	eIF-2beta
FBgn0032816	0.159711	8.62178	4.42299	0.000853566	0.00695188	-1.1908	Nf-YB
FBgn0034878	0.148398	8.47905	4.42096	0.000856578	0.0069686	-1.19443	pita
FBgn0028408	0.192731	7.536	4.42058	0.000857146	0.00696873	-1.19512	Drep-2
FBgn0011661	0.146682	12.4654	4.41987	0.000858208	0.00697287	-1.1964	Moe
FBgn0050463	0.127324	8.7759	4.41882	0.000859766	0.00698103	-1.19827	CG30463
FBgn0005410	0.154493	7.64955	4.41743	0.000861854	0.00699349	-1.20077	sno
FBgn0024944	0.124094	7.66435	4.41663	0.000863054	0.00699872	-1.20221	Oamb
FBgn0000320	0.164136	8.48777	4.41454	0.000866198	0.00701783	-1.20596	eya
FBgn0024734	0.18662	10.4569	4.41408	0.000866894	0.00701783	-1.20679	PRL-1
FBgn0025697	0.148141	11.2862	4.41396	0.000867078	0.00701783	-1.20701	santa-maria
FBgn0259749	0.180589	9.55243	4.41056	0.000872218	0.0070549	-1.2131	mmy
FBgn0033679	-0.156495	7.86953	-4.40913	0.000874381	0.00706787	-1.21566	CG8888
FBgn0033911	0.24692	8.21343	4.40853	0.000875307	0.00707082	-1.21675	VGAT
FBgn0030425	-0.14966	10.6515	-4.40335	0.000883233	0.00713029	-1.22605	CG3775
FBgn0029523	0.162369	7.14558	4.39798	0.000891521	0.00718799	-1.23568	CR18275
FBgn0036501	0.206161	10.6783	4.39833	0.000890989	0.00718799	-1.23507	CG7272
FBgn0031693	-0.235153	10.5151	-4.39622	0.000894267	0.00720093	-1.23886	Cyp4ac1
FBgn0034985	0.166659	8.50901	4.39641	0.000893967	0.00720093	-1.23851	CG3328
FBgn0023540	-0.283314	9.32165	-4.39482	0.000896448	0.00721098	-1.24137	CG3630
FBgn0032725	-0.150169	9.97438	-4.39469	0.000896658	0.00721098	-1.24161	Nedd8
FBgn0025608	0.165688	9.87046	4.39329	0.000898848	0.00722143	-1.24413	Faf
FBgn0250746	-0.190846	10.8881	-4.39312	0.000899102	0.00722143	-1.24442	Prosbeta7
FBgn0030260	0.150856	7.91852	4.39129	0.000901986	0.00723998	-1.24772	CG1537
FBgn0013334	0.289403	9.10579	4.38738	0.000908145	0.00728479	-1.25474	Sap47
FBgn0031906	0.186108	7.30495	4.38627	0.0009099	0.00729287	-1.25673	CG5160
FBgn0033730	-0.249024	9.53423	-4.38602	0.000910308	0.00729287	-1.25719	Cpr49Ag
FBgn0035726	-0.199142	10.8042	-4.38484	0.000912172	0.00730317	-1.2593	CG9953
FBgn0052103	0.222877	9.93563	4.38327	0.000914672	0.00731854	-1.26213	CG32103
FBgn0038464	0.159209	7.93663	4.38239	0.000916077	0.00732514	-1.26371	CG16941
FBgn0034966	0.180785	7.70725	4.3793	0.000921027	0.00736005	-1.26927	CG13563
FBgn0003149	0.21112	10.3346	4.37645	0.000925617	0.00738033	-1.27439	Prm
FBgn0025454	0.319516	12.1447	4.37627	0.000925904	0.00738033	-1.27471	Cyp6g1
FBgn0038515	0.133459	10.3584	4.37647	0.000925593	0.00738033	-1.27437	CG5823
FBgn0040273	0.131799	8.92201	4.37708	0.000924603	0.00738033	-1.27326	Spt5
FBgn0034436	-0.181435	8.69008	-4.3706	0.00093512	0.00744908	-1.28492	CG11961
FBgn0000061	-0.161824	7.09682	-4.36964	0.000936676	0.00745207	-1.28664	al
FBgn0028996	0.258736	9.33279	4.36997	0.000936148	0.00745207	-1.28606	onecut
FBgn0037780	0.152334	8.87719	4.36798	0.000939406	0.00746437	-1.28964	CG3925
FBgn0040104	-0.166086	6.77802	-4.36823	0.000938997	0.00746437	-1.28919	lectin-24A
FBgn0038343	0.232215	8.66554	4.36473	0.000944746	0.00749992	-1.29548	CG14871
FBgn0053520	0.135888	7.48931	4.36453	0.000945068	0.00749992	-1.29583	Rpb4
FBgn0032512	-0.192956	8.56536	-4.36271	0.00094809	0.00751011	-1.29913	CG9305
FBgn0033523	0.133295	9.13761	4.36232	0.000948733	0.00751011	-1.29983	CG12895
FBgn0033903	-0.175987	8.33162	-4.36267	0.000948153	0.00751011	-1.29919	CG8323
FBgn0039927	0.222913	8.90636	4.36331	0.000947097	0.00751011	-1.29805	CG11155
FBgn0029137	0.187647	8.21678	4.36191	0.000949411	0.00751076	-1.30056	Patsas
FBgn0037873	0.137519	11.9557	4.36108	0.000950784	0.00751692	-1.30205	SdhC
FBgn0040323	-0.136358	8.73268	-4.35627	0.000958809	0.00757561	-1.31072	GNBP1
FBgn0259978	0.12113	8.8271	4.35504	0.000960869	0.00758714	-1.31293	vlc
FBgn0004103	0.127196	11.4447	4.35346	0.000963528	0.00759924	-1.31578	Pp1-87B
FBgn0034480	-0.49745	9.31768	-4.35341	0.000963606	0.00759924	-1.31586	CG16898
FBgn0031148	0.279914	8.1283	4.3522	0.00096565	0.0076106	-1.31804	CG1753
FBgn0051632	0.134191	6.92734	4.34863	0.000971685	0.00765339	-1.32447	sens-2
FBgn0032770	-0.168631	9.63964	-4.34635	0.000975567	0.00767917	-1.32858	CG13086
FBgn0032727	0.137724	8.80011	4.34581	0.0009765	0.00768172	-1.32956	CG10623
FBgn0033465	-0.226877	10.3246	-4.34542	0.000977155	0.00768209	-1.33025	CG12140
FBgn0034247	-0.194884	6.94318	-4.34471	0.000978373	0.00768686	-1.33154	CG6484
FBgn0028938	-0.142223	7.30436	-4.34085	0.000985007	0.00773418	-1.3385	CG16886
FBgn0033742	-0.275251	8.06927	-4.34029	0.000985965	0.00773688	-1.3395	CG8550
FBgn0035500	0.13213	9.95876	4.33461	0.000995808	0.00780926	-1.34974	ens
FBgn0002609	0.251847	7.10115	4.3305	0.001003	0.00786074	-1.35715	HLHm3
FBgn0033426	0.14509	9.31414	4.32984	0.00100416	0.00786496	-1.35834	CG1814
FBgn0032476	0.130824	8.36281	4.32782	0.00100771	0.00788787	-1.36198	CG5439
FBgn0035690	0.152654	7.28095	4.32656	0.00100994	0.00790041	-1.36426	CG10274
FBgn0000037	0.171497	8.79296	4.32541	0.00101197	0.0079114	-1.36633	mAcR-60C
FBgn0031957	0.141374	6.4746	4.32485	0.00101296	0.00791425	-1.36734	TwdlE
FBgn0030955	-0.266443	6.79929	-4.32419	0.00101414	0.00791858	-1.36854	CG6891
FBgn0032233	0.188262	9.57357	4.32121	0.00101944	0.00795502	-1.37391	dpr19
FBgn0035233	-0.142431	8.48635	-4.31667	0.00102758	0.00800862	-1.3821	pex10
FBgn0037466	0.149505	9.36403	4.3168	0.00102735	0.00800862	-1.38187	CG1965
FBgn0031670	-0.124815	11.1142	-4.31559	0.00102952	0.00801532	-1.38405	CG3887
FBgn0052711	0.16198	8.2536	4.31549	0.00102971	0.00801532	-1.38423	CG32711
FBgn0035027	0.208787	8.15136	4.31394	0.0010325	0.00803209	-1.38702	CG3511
FBgn0004603	0.150405	10.1167	4.31118	0.00103751	0.00806115	-1.39201	Src42A
FBgn0027509	-0.147832	8.2242	-4.31131	0.00103727	0.00806115	-1.39177	CG7261
FBgn0261394	-0.160258	10.3896	-4.3099	0.00103985	0.00807433	-1.39433	Pros29
FBgn0000500	0.136931	11.2693	4.30875	0.00104194	0.0080856	-1.3964	Dsk
FBgn0002719	0.186512	13.0128	4.30746	0.00104429	0.00809011	-1.39872	Men
FBgn0032706	0.126249	7.89664	4.30703	0.00104508	0.00809011	-1.3995	Irk3
FBgn0037347	0.1683	8.99065	4.3074	0.0010444	0.00809011	-1.39883	CG1427
FBgn0038837	0.138762	7.89035	4.30517	0.00104849	0.0081115	-1.40285	CG3822
FBgn0020620	0.138818	7.93442	4.30383	0.00105097	0.00812567	-1.40528	RN-tre
FBgn0003302	0.20796	7.90811	4.30271	0.00105303	0.00813667	-1.40731	rux
FBgn0259221	0.132257	7.67639	4.30162	0.00105505	0.00814723	-1.40927	CG42321
FBgn0032130	0.163874	7.74449	4.3008	0.00105657	0.00815277	-1.41076	CG3838
FBgn0034504	0.142621	10.0209	4.30053	0.00105706	0.00815277	-1.41123	CG8929
FBgn0031092	-0.183977	11.2018	-4.29952	0.00105894	0.00816229	-1.41307	CG9577
FBgn0046999	0.308191	8.80818	4.29391	0.0010694	0.00823792	-1.42319	CG6429
FBgn0035550	0.237719	6.83645	4.29244	0.00107218	0.00825426	-1.42586	CG11349
FBgn0038923	-0.139223	9.19452	-4.28904	0.00107859	0.00829349	-1.432	mRpL35
FBgn0053179	0.166895	7.2602	4.28909	0.0010785	0.00829349	-1.43192	beat-IIIb
FBgn0032919	-0.159659	9.40183	-4.28634	0.00108371	0.0083278	-1.43688	CG9253
FBgn0011296	-0.19914	9.92459	-4.28363	0.00108887	0.00835796	-1.44178	l(2)efl
FBgn0082582	0.187336	10.1974	4.28359	0.00108896	0.00835796	-1.44186	tmod
FBgn0004368	0.135488	8.55296	4.2807	0.0010945	0.00839379	-1.44709	Ptp4E
FBgn0039551	-0.123597	6.27081	-4.28046	0.00109496	0.00839379	-1.44751	Or98a
FBgn0033918	-0.147647	9.3984	-4.27973	0.00109636	0.00839947	-1.44883	CG8531
FBgn0032013	0.16633	7.87351	4.27895	0.00109787	0.00840591	-1.45025	Scgalpha
FBgn0039719	-0.150659	7.19518	-4.27766	0.00110035	0.00841975	-1.45257	CG15515
FBgn0000568	0.221138	8.31457	4.27654	0.00110251	0.00843121	-1.45459	Eip75B
FBgn0036349	-0.140716	6.57267	-4.27504	0.00110542	0.0084365	-1.4573	SNCF
FBgn0050361	0.149077	7.51338	4.27518	0.00110515	0.0084365	-1.45705	mtt
FBgn0259178	0.117927	7.78497	4.27489	0.00110573	0.0084365	-1.45759	5PtaseI
FBgn0259750	0.16501	7.70526	4.27481	0.00110588	0.0084365	-1.45773	ab
FBgn0051072	0.152081	8.80318	4.27329	0.00110883	0.0084539	-1.46047	Lerp
FBgn0050011	0.16866	12.207	4.27268	0.00111002	0.00845789	-1.46158	gem
FBgn0005664	-0.540251	9.12375	-4.27201	0.00111134	0.00846088	-1.4628	Cry
FBgn0033302	-0.180958	7.89809	-4.27179	0.00111176	0.00846088	-1.46319	Cyp6a14
FBgn0010741	0.138063	9.93739	4.26998	0.0011153	0.00848277	-1.46647	l(3)01239
FBgn0030091	0.155881	7.82206	4.2681	0.001119	0.00850572	-1.46987	CG7065
FBgn0041706	0.11887	7.69283	4.267	0.00112116	0.00851704	-1.47186	CG3253
FBgn0032651	0.143958	8.22578	4.26662	0.00112191	0.00851761	-1.47255	Oli
FBgn0005391	-0.117282	14.8666	-4.26576	0.0011236	0.00852527	-1.47409	Yp2
FBgn0038321	0.167851	9.87809	4.26454	0.00112601	0.00853849	-1.47631	CG6218
FBgn0039584	0.173207	7.28155	4.26305	0.00112897	0.00855575	-1.479	beat-VI
FBgn0029819	0.15116	10.0656	4.26271	0.00112965	0.00855578	-1.47963	CG3016
FBgn0004179	0.157695	10.5586	4.26224	0.00113057	0.00855644	-1.48046	Csp
FBgn0013347	0.151033	9.88237	4.26198	0.00113109	0.00855644	-1.48094	TfIIA-S
FBgn0020385	-0.230966	11.8607	-4.26144	0.00113218	0.0085595	-1.48193	pug
FBgn0003068	-0.189111	7.57048	-4.25952	0.001136	0.00858325	-1.48539	per
FBgn0037050	0.137276	9.04785	4.25852	0.001138	0.0085932	-1.4872	CG10566
FBgn0038348	-0.155502	6.52966	-4.25801	0.00113902	0.00859582	-1.48813	CG18519
FBgn0029507	0.16147	10.0109	4.2567	0.00114165	0.00861047	-1.4905	Tsp42Ed
FBgn0025631	-0.127492	10.5958	-4.25493	0.0011452	0.0086285	-1.4937	moody
FBgn0033382	-0.156797	8.1899	-4.25483	0.00114541	0.0086285	-1.49388	Hydr1
FBgn0030001	-0.132919	6.85823	-4.25152	0.00115209	0.00866799	-1.49987	cyr
FBgn0030742	0.15899	8.95452	4.25123	0.00115268	0.00866799	-1.50039	CG9919
FBgn0034741	-0.483299	7.48732	-4.25122	0.00115271	0.00866799	-1.50042	CG4269
FBgn0011817	0.218499	9.72181	4.24968	0.00115584	0.00868634	-1.50321	nmo
FBgn0261588	0.171893	8.40221	4.24862	0.001158	0.0086974	-1.50514	pdm3
FBgn0038858	-0.15688	11.0872	-4.24699	0.00116132	0.00871715	-1.50808	CG5793
FBgn0036319	0.167725	8.88629	4.24409	0.00116726	0.00875655	-1.51334	Ent3
FBgn0026190	0.183143	6.79333	4.24298	0.00116954	0.00875765	-1.51534	PH4alphaMP
FBgn0027081	-0.174462	9.76532	-4.24287	0.00116977	0.00875765	-1.51555	Aats-thr
FBgn0050457	-0.193819	7.71861	-4.24291	0.0011697	0.00875765	-1.51548	CG30457
FBgn0061492	-0.180078	10.2655	-4.24267	0.00117019	0.00875765	-1.51591	loj
FBgn0000241	0.153608	7.60493	4.24113	0.00117336	0.00877617	-1.51869	bw
FBgn0034180	0.142462	8.93115	4.2404	0.00117486	0.00878224	-1.52001	CG15609
FBgn0036742	0.23199	8.69256	4.23998	0.00117574	0.00878358	-1.52078	CG7497
FBgn0038194	-0.143707	12.6286	-4.23718	0.00118155	0.00882174	-1.52585	Cyp6d5
FBgn0031759	0.22035	8.55983	4.23458	0.00118698	0.00885704	-1.53057	lid
FBgn0260940	0.121602	8.58736	4.23245	0.00119143	0.00888503	-1.53442	lsn
FBgn0085734	0.197523	6.43142	4.23186	0.00119267	0.00888904	-1.53549	CR40450
FBgn0010280	0.208486	8.91452	4.22736	0.00120218	0.00895458	-1.54366	Taf4
FBgn0000392	-0.22725	7.02493	-4.22519	0.00120677	0.00897821	-1.54758	cup
FBgn0017590	0.160908	8.07914	4.22551	0.00120609	0.00897821	-1.54701	klg
FBgn0040271	0.177876	8.77631	4.22462	0.00120799	0.008982	-1.54862	Sulf1
FBgn0036470	-0.139193	6.31043	-4.22356	0.00121025	0.00899345	-1.55054	CG13463
FBgn0038589	-0.180146	9.3592	-4.22273	0.00121202	0.00900137	-1.55205	CG18598
FBgn0030027	0.172464	8.88795	4.22183	0.00121395	0.00900945	-1.55368	CG1632
FBgn0085257	-0.171296	9.80658	-4.22155	0.00121454	0.00900945	-1.55419	CG34228
FBgn0034643	0.149125	8.21749	4.21389	0.00123105	0.00912121	-1.56808	CG10321
FBgn0036656	-0.165345	9.23046	-4.21422	0.00123034	0.00912121	-1.56748	CG13026
FBgn0025814	0.367538	9.81434	4.21175	0.00123573	0.00914546	-1.57198	Mgstl
FBgn0034887	-0.187461	9.02017	-4.21172	0.00123578	0.00914546	-1.57201	CG5428
FBgn0039075	0.184969	7.01589	4.20916	0.00124138	0.00918156	-1.57667	CG4393
FBgn0037165	0.228312	7.36762	4.20649	0.00124724	0.00921951	-1.58151	CG11437
FBgn0034909	-0.198011	9.56978	-4.20424	0.00125219	0.00925069	-1.58559	CG4797
FBgn0035023	0.164965	9.90734	4.20171	0.00125782	0.00928681	-1.5902	itp
FBgn0032943	0.205967	8.10916	4.20081	0.00125981	0.00929605	-1.59182	Tsp39D
FBgn0031673	0.119869	9.9117	4.19583	0.00127094	0.00937273	-1.60087	CG31650
FBgn0041161	0.148277	8.4085	4.19389	0.0012753	0.0093994	-1.60439	blue
FBgn0039149	0.127576	9.0501	4.19146	0.00128079	0.00943432	-1.6088	CG18428
FBgn0030710	0.137688	8.08312	4.18947	0.00128528	0.00946192	-1.61241	CG8924
FBgn0003248	-0.130134	11.7776	-4.18754	0.00128969	0.00948883	-1.61593	Rh2
FBgn0036551	-0.142104	9.38749	-4.18535	0.0012947	0.0095201	-1.61991	CG17029
FBgn0034201	-0.145242	6.38966	-4.18255	0.00130111	0.00956167	-1.62499	CG17290
FBgn0032506	0.180985	7.30498	4.17846	0.00131054	0.00962537	-1.63241	CG9395
FBgn0015268	0.145656	11.7124	4.17801	0.0013116	0.00962756	-1.63324	Nap1
FBgn0037252	0.150311	9.09232	4.17677	0.00131447	0.00964304	-1.63549	CG14650
FBgn0037518	-0.151563	8.16665	-4.17464	0.00131944	0.00967261	-1.63937	CG2641
FBgn0061200	0.148554	9.10209	4.17438	0.00132004	0.00967261	-1.63983	Nup153
FBgn0037602	-0.183237	8.50179	-4.17393	0.0013211	0.00967475	-1.64066	CG8021
FBgn0000416	0.124003	13.0062	4.16836	0.00133417	0.0097592	-1.65078	Sap-r
FBgn0004414	-0.132218	6.53958	-4.16457	0.00134314	0.00981911	-1.65767	msopa
FBgn0004107	0.141456	7.2044	4.16271	0.00134758	0.00984586	-1.66106	cdc2c
FBgn0037465	0.12987	8.66738	4.16035	0.00135323	0.00988136	-1.66535	CG1105
FBgn0033352	0.127122	9.68281	4.15909	0.00135625	0.0098977	-1.66765	CG8232
FBgn0053653	0.235646	8.72034	4.1575	0.00136007	0.00991986	-1.67054	Caps
FBgn0052137	-0.160772	8.67604	-4.15679	0.00136177	0.00992651	-1.67182	CG32137
FBgn0034742	0.167224	8.87715	4.15637	0.00136278	0.00992814	-1.67258	CG4294
FBgn0027550	0.205064	9.14608	4.15544	0.00136502	0.00993876	-1.67427	CG6495
FBgn0032202	0.122039	10.2713	4.15468	0.00136688	0.00994651	-1.67567	CG18619
FBgn0033551	0.133812	9.79115	4.15166	0.00137421	0.00999411	-1.68117	CG7222
FBgn0026315	0.147543	8.40523	4.1472	0.0013851	0.0100675	-1.68928	Ugt35a
FBgn0001125	-0.20412	12.0881	-4.14543	0.00138944	0.0100933	-1.69249	Got2
FBgn0037976	0.15494	8.23566	4.14451	0.00139172	0.010104	-1.69417	Tk
FBgn0036367	0.119634	6.72453	4.14294	0.00139559	0.0101263	-1.69703	CG10116
FBgn0025936	0.230567	9.41372	4.14237	0.00139702	0.0101308	-1.69807	Eph
FBgn0008635	-0.137888	10.1084	-4.14056	0.00140149	0.0101574	-1.70136	betaCop
FBgn0000319	0.119971	11.227	4.13984	0.0014033	0.0101588	-1.70268	Chc
FBgn0031305	-0.128843	11.9031	-4.13926	0.00140472	0.0101633	-1.70372	Iris
FBgn0028954	0.132648	9.90728	4.1354	0.00141437	0.0102273	-1.71076	CG3287
FBgn0011241	0.117723	8.86471	4.13106	0.00142529	0.0102853	-1.71866	cbx
FBgn0034509	0.170912	11.5257	4.13123	0.00142487	0.0102853	-1.71836	Obp57c
FBgn0035947	-0.151775	10.3808	-4.13184	0.00142332	0.0102853	-1.71724	Srp68
FBgn0039293	-0.13678	8.56547	-4.13092	0.00142566	0.0102853	-1.71892	CG11851
FBgn0036492	-0.144591	7.05208	-4.12772	0.00143376	0.0103378	-1.72474	Best3
FBgn0031580	-0.145524	7.03093	-4.12689	0.00143588	0.0103472	-1.72626	CG15423
FBgn0011676	0.125748	8.19675	4.12197	0.00144848	0.010432	-1.73523	Nos
FBgn0262117	0.137207	9.85684	4.121	0.00145096	0.010444	-1.73699	CG17665
FBgn0000279	-0.300798	6.4621	-4.1194	0.00145509	0.0104583	-1.73991	CecC
FBgn0033846	0.144025	8.0049	4.11926	0.00145544	0.0104583	-1.74016	mip120
FBgn0086757	0.130155	8.59027	4.11974	0.00145423	0.0104583	-1.7393	cbs
FBgn0033109	0.140409	11.4077	4.11616	0.00146347	0.01051	-1.74581	coro
FBgn0027532	0.198979	9.56725	4.11455	0.00146767	0.0105257	-1.74874	CG7139
FBgn0034398	0.165608	12.5338	4.11436	0.00146816	0.0105257	-1.74909	CG15098
FBgn0035688	0.137197	8.29048	4.11443	0.00146798	0.0105257	-1.74896	CG10289
FBgn0000250	0.133814	9.4597	4.1139	0.00146936	0.0105283	-1.74993	cact
FBgn0029891	0.144583	10.4741	4.11354	0.0014703	0.0105291	-1.75058	Pink1
FBgn0010621	-0.13776	9.87578	-4.11184	0.00147474	0.0105512	-1.75368	Cct5
FBgn0028984	0.125746	10.1181	4.11152	0.00147558	0.0105512	-1.75426	Spn5
FBgn0039707	-0.154897	6.47527	-4.1114	0.00147589	0.0105512	-1.75448	CG15510
FBgn0001215	0.134598	10.2674	4.10917	0.00148176	0.0105871	-1.75856	Hrb98DE
FBgn0026418	-0.169824	9.69223	-4.1083	0.00148404	0.0105937	-1.76014	Hsc70Cb
FBgn0039530	0.209032	7.61412	4.10818	0.00148436	0.0105937	-1.76035	Tusp
FBgn0041194	0.185397	11.5797	4.10766	0.00148575	0.0105976	-1.76132	Prat2
FBgn0025701	-0.190287	9.51498	-4.10724	0.00148686	0.0105981	-1.76208	CG14709
FBgn0039277	0.139064	9.42029	4.10699	0.0014875	0.0105981	-1.76253	CG13650
FBgn0030574	-0.172023	9.94332	-4.10608	0.00148992	0.0106094	-1.7642	CG9413
FBgn0030208	-0.156575	8.77546	-4.10308	0.00149788	0.01066	-1.76966	PPP4R2r
FBgn0031987	-0.131646	9.68113	-4.10179	0.0015013	0.0106784	-1.77201	CG12375
FBgn0011763	0.165346	9.11532	4.10053	0.00150468	0.0106964	-1.77431	Dp
FBgn0038535	-0.17303	8.95541	-4.09893	0.00150896	0.0107208	-1.77723	alt
FBgn0003317	0.139078	9.71883	4.09685	0.00151454	0.0107454	-1.78102	sax
FBgn0003710	0.201956	8.04951	4.09669	0.00151498	0.0107454	-1.78132	tipE
FBgn0044324	0.140985	8.24289	4.09703	0.00151407	0.0107454	-1.7807	Chro
FBgn0036698	-0.16167	9.07203	-4.09628	0.00151609	0.0107472	-1.78207	CG7724
FBgn0030994	-0.175361	6.47893	-4.09578	0.00151743	0.0107506	-1.78297	CG14193
FBgn0039043	0.177295	9.26683	4.09474	0.00152025	0.0107646	-1.78488	CG17121
FBgn0031428	-0.294825	9.22639	-4.09349	0.00152363	0.0107825	-1.78716	CG9886
FBgn0015372	-0.123299	8.54239	-4.09309	0.00152471	0.010784	-1.78788	chrw
FBgn0030744	0.130209	7.97548	4.0919	0.00152794	0.0107994	-1.79006	CG9992
FBgn0030753	-0.140698	9.22806	-4.09166	0.00152859	0.0107994	-1.79049	CG4420
FBgn0024330	0.159524	8.32242	4.09108	0.00153015	0.0108044	-1.79155	MED6
FBgn0039481	0.647774	7.48242	4.09054	0.00153164	0.0108088	-1.79254	Cpr97Eb
FBgn0261955	0.162953	11.8447	4.08766	0.00153951	0.0108534	-1.7978	kdn
FBgn0034807	0.122012	6.31233	4.08664	0.00154231	0.0108659	-1.79966	CG9897
FBgn0002543	0.123212	7.39849	4.08617	0.0015436	0.0108689	-1.80052	lea
FBgn0086447	-0.151185	8.55075	-4.0856	0.00154514	0.0108737	-1.80155	l(2)37Cg
FBgn0011828	-0.167869	7.65219	-4.08311	0.001552	0.0109159	-1.8061	Pxn
FBgn0035909	0.14021	10.8238	4.08256	0.00155354	0.0109206	-1.80711	ergic53
FBgn0260442	0.14021	10.8238	4.08256	0.00155354	0.0109206	-1.80711	rhea
FBgn0036934	0.143774	8.75763	4.08101	0.00155783	0.0109447	-1.80994	sNPF-R
FBgn0034999	-0.193879	7.85104	-4.07928	0.00156261	0.01096	-1.81309	CG3394
FBgn0036316	0.213723	10.2943	4.07957	0.0015618	0.01096	-1.81256	CG10960
FBgn0260964	0.149166	8.50384	4.07942	0.00156224	0.01096	-1.81284	Vmat
FBgn0039358	0.265369	10.979	4.07888	0.00156372	0.0109617	-1.81381	CG5028
FBgn0035546	-0.121077	7.23547	-4.07833	0.00156526	0.0109663	-1.81482	CG11345
FBgn0015218	0.127163	11.8185	4.07753	0.00156751	0.010976	-1.8163	eIF-4E
FBgn0036897	0.130426	8.5705	4.07609	0.00157151	0.0109918	-1.81891	CG8786
FBgn0039203	-0.220331	8.47494	-4.07625	0.00157105	0.0109918	-1.81861	CG13618
FBgn0037290	-0.268661	10.8431	-4.07578	0.00157238	0.0109918	-1.81948	CG1124
FBgn0052687	0.138332	11.684	4.07468	0.00157546	0.0110073	-1.82149	CG32687
FBgn0003016	0.197059	9.35722	4.07324	0.00157951	0.0110295	-1.82412	osp
FBgn0025456	-0.184679	10.7805	-4.07282	0.00158068	0.0110315	-1.82488	CREG
FBgn0025382	0.148762	8.14281	4.07222	0.00158238	0.0110373	-1.82598	Rab27
FBgn0037186	-0.159919	7.83998	-4.07154	0.00158428	0.0110444	-1.82722	CG11241
FBgn0029754	-0.131012	6.83853	-4.06733	0.0015962	0.0111214	-1.83491	CG15930
FBgn0032781	-0.12481	8.74748	-4.06664	0.00159818	0.0111291	-1.83618	CG9987
FBgn0040736	-0.124346	13.2589	-4.06588	0.00160033	0.0111379	-1.83756	IM3
FBgn0034638	0.120241	13.1443	4.06489	0.00160315	0.0111514	-1.83937	CG10433
FBgn0086372	0.147378	9.13905	4.06114	0.00161389	0.0112199	-1.84621	lap
FBgn0022224	-0.124969	9.55786	-4.05914	0.00161966	0.0112298	-1.84987	ubl
FBgn0028979	0.148542	6.47199	4.0591	0.00161977	0.0112298	-1.84995	tio
FBgn0032452	-0.124989	6.58983	-4.05952	0.00161858	0.0112298	-1.84919	CG15484
FBgn0036876	0.346244	10.7166	4.05932	0.00161913	0.0112298	-1.84954	CG9451
FBgn0050373	-0.126239	8.99651	-4.05979	0.00161778	0.0112298	-1.84868	CG30373
FBgn0261535	-0.138477	7.87771	-4.05721	0.00162526	0.0112602	-1.85341	l(2)34Fd
FBgn0032253	-0.193074	8.51353	-4.05697	0.00162595	0.0112602	-1.85385	CG5322
FBgn0050109	-0.14673	7.64445	-4.0563	0.00162789	0.0112676	-1.85507	CG30109
FBgn0040797	-0.176061	8.07202	-4.05483	0.00163215	0.0112908	-1.85775	CG13066
FBgn0039536	0.226403	8.33853	4.05076	0.00164403	0.0113668	-1.86519	CG18437
FBgn0032249	0.15801	9.31413	4.05026	0.00164549	0.0113686	-1.8661	CG5337
FBgn0034629	-0.145056	10.0958	-4.05006	0.00164609	0.0113686	-1.86648	Acox57D-d
FBgn0040752	0.207744	8.72761	4.0497	0.00164716	0.0113697	-1.86714	Prosap
FBgn0261985	0.125285	9.28602	4.04844	0.00165085	0.0113831	-1.86944	Ptpmeg
FBgn0039326	-0.221282	9.50931	-4.04842	0.00165089	0.0113831	-1.86946	CG10562
FBgn0051052	-0.169917	8.76072	-4.04786	0.00165255	0.0113883	-1.87049	Nha2
FBgn0085384	0.244752	7.16352	4.04749	0.00165365	0.0113896	-1.87118	CG34355
FBgn0028397	0.287016	8.58972	4.04663	0.00165619	0.0114007	-1.87275	Tob
FBgn0035515	-0.215289	9.09357	-4.04633	0.00165707	0.0114007	-1.87329	CG14997
FBgn0038774	-0.288424	9.48742	-4.04285	0.00166738	0.0114596	-1.87966	CG5023
FBgn0086768	0.136343	10.1086	4.04283	0.00166745	0.0114596	-1.87969	Pcmt
FBgn0004595	0.226292	7.96533	4.04166	0.00167092	0.0114772	-1.88183	pros
FBgn0031268	0.148106	9.22399	4.03961	0.00167705	0.011513	-1.88558	cold
FBgn0002938	0.136024	11.0007	4.03497	0.00169097	0.0115947	-1.89406	ninaC
FBgn0036784	-0.107942	6.57032	-4.03465	0.00169196	0.0115947	-1.89466	CG5103
FBgn0037627	0.130356	7.9431	4.03443	0.00169261	0.0115947	-1.89505	CG13318
FBgn0016036	-0.162519	6.56105	-4.0321	0.00169968	0.0116368	-1.89932	mei-P22
FBgn0033988	0.124942	9.12008	4.03085	0.00170347	0.0116564	-1.90161	pcs
FBgn0039827	-0.219963	9.16768	-4.02835	0.00171108	0.0117021	-1.90618	CG1544
FBgn0002906	0.15118	6.41379	4.02755	0.00171351	0.0117124	-1.90763	mus309
FBgn0031498	-0.119381	8.08318	-4.02701	0.00171517	0.0117174	-1.90862	CG17260
FBgn0038149	0.132826	10.7913	4.02451	0.00172283	0.0117634	-1.91319	CG9796
FBgn0035833	0.142512	7.95385	4.02398	0.00172447	0.0117682	-1.91417	CG7565
FBgn0032472	-0.116741	12.7796	-4.02335	0.00172642	0.0117751	-1.91532	CG9928
FBgn0033677	0.147922	9.66325	4.02274	0.00172829	0.0117751	-1.91644	CG8321
FBgn0039633	0.161947	6.96415	4.02293	0.00172771	0.0117751	-1.91609	CG11873
FBgn0033827	-0.186045	6.52015	-4.02137	0.00173252	0.0117976	-1.91894	CG17047
FBgn0027617	-0.182986	6.74559	-4.01685	0.00174656	0.0118868	-1.92721	CG5808
FBgn0013799	0.164486	8.27447	4.01616	0.00174873	0.0118882	-1.92848	Deaf1
FBgn0015794	0.132646	10.2961	4.01644	0.00174786	0.0118882	-1.92798	Rab-RP4
FBgn0023529	-0.196673	9.85857	-4.01576	0.00174999	0.0118882	-1.92923	CG2918
FBgn0259182	0.145327	8.08221	4.01542	0.00175103	0.0118882	-1.92984	CG42286
FBgn0259192	-0.127395	6.57805	-4.01528	0.00175149	0.0118882	-1.9301	CG42296
FBgn0010825	0.134271	8.39991	4.01066	0.001766	0.0119803	-1.93856	Gug
FBgn0039712	0.138779	8.98637	4.00497	0.00178404	0.0120941	-1.94897	CG15514
FBgn0243486	0.124658	8.9816	4.00477	0.00178469	0.0120941	-1.94935	rdo
FBgn0027608	0.184823	7.70752	4.00276	0.00179109	0.012131	-1.95302	CG2082
FBgn0037944	0.111124	7.86327	4.00239	0.00179228	0.0121325	-1.95369	CG6923
FBgn0027259	-0.121569	6.55767	-4.00201	0.00179351	0.0121343	-1.9544	Kmn1
FBgn0038532	0.144998	7.93926	4.00048	0.00179842	0.012161	-1.9572	CG14322
FBgn0035995	0.176855	9.40044	3.99834	0.00180531	0.0122011	-1.96112	CG3529
FBgn0040308	-0.208591	8.32236	-3.99793	0.00180665	0.0122036	-1.96188	Jafrac2
FBgn0032001	-0.149695	11.3835	-3.9956	0.00181417	0.0122478	-1.96613	CG8360
FBgn0040950	-0.14182	6.81246	-3.99443	0.00181797	0.012267	-1.96828	Muc26B
FBgn0010406	0.131148	9.83892	3.99331	0.00182162	0.012285	-1.97033	RNaseX25
FBgn0029764	-0.140486	10.7934	-3.98884	0.00183626	0.0123647	-1.97853	yu
FBgn0040637	0.218139	11.5778	3.9888	0.00183638	0.0123647	-1.9786	CG11458
FBgn0040989	-0.129719	6.50215	-3.98893	0.00183597	0.0123647	-1.97837	CG5693
FBgn0015019	-0.120125	9.38023	-3.98671	0.00184325	0.0123911	-1.98242	Cctgamma
FBgn0027093	-0.133784	8.8742	-3.98675	0.00184313	0.0123911	-1.98235	Aats-arg
FBgn0029761	0.126068	8.26182	3.98675	0.00184312	0.0123911	-1.98235	SK
FBgn0001978	0.131397	9.04638	3.98555	0.00184708	0.0124036	-1.98455	stc
FBgn0030679	-0.206219	10.7673	-3.98583	0.00184616	0.0124036	-1.98404	CG8206
FBgn0043010	0.151494	9.20981	3.98378	0.00185294	0.0124364	-1.98779	Fsn
FBgn0000711	0.130445	12.1815	3.98263	0.00185676	0.0124554	-1.9899	flw
FBgn0015032	0.162052	7.49411	3.97996	0.00186565	0.0125084	-1.9948	Cyp4c3
FBgn0023525	-0.181419	8.63043	-3.97951	0.00186717	0.0125119	-1.99563	CG3191
FBgn0003042	0.161771	8.41784	3.97767	0.00187331	0.0125448	-1.99899	Pc
FBgn0026015	0.146541	7.3313	3.97721	0.00187487	0.0125448	-1.99984	Top3beta
FBgn0032729	-0.131288	10.4694	-3.9769	0.00187591	0.0125448	-2.00041	CG10639
FBgn0032731	0.161119	10.5258	3.97686	0.00187605	0.0125448	-2.00049	CG10641
FBgn0032847	0.137854	8.51638	3.97602	0.00187886	0.0125569	-2.00202	Taf13
FBgn0039306	0.138997	8.80478	3.97475	0.00188315	0.012579	-2.00436	CG11859
FBgn0039290	-0.151498	7.68578	-3.97443	0.00188421	0.0125793	-2.00493	CG13654
FBgn0036665	-0.148557	7.68353	-3.97411	0.00188529	0.0125799	-2.00552	CG13024
FBgn0000464	0.224883	9.028	3.97298	0.0018891	0.0125831	-2.00759	Lar
FBgn0031090	0.15872	8.76363	3.97279	0.00188976	0.0125831	-2.00794	Rab35
FBgn0033906	-0.143991	12.221	-3.97343	0.0018876	0.0125831	-2.00677	CG8331
FBgn0034583	-0.110379	11.6278	-3.97326	0.00188817	0.0125831	-2.00708	CG10527
FBgn0039804	0.199048	7.16258	3.97098	0.0018959	0.0126174	-2.01127	CG15544
FBgn0038818	0.190006	9.60321	3.96919	0.00190199	0.0126512	-2.01455	Nep4
FBgn0016078	0.152768	8.99425	3.96515	0.00191578	0.0127362	-2.02195	wun
FBgn0039877	-0.207385	8.0316	-3.96416	0.00191921	0.0127523	-2.02378	CG2118
FBgn0040928	0.168605	7.46067	3.96362	0.00192107	0.0127579	-2.02477	CG15345
FBgn0033902	0.116862	12.2779	3.96269	0.00192425	0.0127723	-2.02646	Tango7
FBgn0033137	-0.173258	6.81827	-3.96114	0.0019296	0.0127966	-2.02931	Tsp42Ep
FBgn0039667	-0.160602	7.97029	-3.96104	0.00192994	0.0127966	-2.02949	CG2010
FBgn0000662	0.139049	9.5056	3.96063	0.00193137	0.0127994	-2.03024	fl(2)d
FBgn0038385	0.194638	7.21873	3.96012	0.00193314	0.0128044	-2.03118	CG4221
FBgn0037230	-0.211259	10.8393	-3.95897	0.00193711	0.012824	-2.03328	CG9780
FBgn0086779	0.197139	8.20588	3.95316	0.0019574	0.0129515	-2.04395	step
FBgn0026086	0.128638	7.05461	3.95119	0.00196434	0.0129906	-2.04757	Adar
FBgn0010434	0.123594	10.1069	3.94924	0.00197123	0.0130212	-2.05115	cora
FBgn0033075	-0.149357	8.28293	-3.94919	0.00197139	0.0130212	-2.05124	Pld
FBgn0034763	0.122747	8.43514	3.949	0.00197206	0.0130212	-2.05159	RYBP
FBgn0000489	0.118678	10.0655	3.94506	0.00198604	0.0131008	-2.05882	Pka-C3
FBgn0039419	-0.163468	9.08596	-3.94502	0.00198619	0.0131008	-2.05889	CG12290
FBgn0031646	-0.158321	7.12396	-3.94232	0.00199582	0.0131574	-2.06384	CG2837
FBgn0053468	-0.180177	6.95993	-3.94143	0.00199902	0.0131716	-2.06548	CG33468
FBgn0034313	0.124337	8.48945	3.94041	0.00200267	0.0131888	-2.06735	CG5726
FBgn0032231	0.124924	8.2768	3.93842	0.00200984	0.0132291	-2.07101	CG5056
FBgn0035951	0.12585	8.11762	3.93723	0.00201413	0.0132504	-2.07319	CG5068
FBgn0004172	-0.173975	6.35505	-3.9361	0.00201823	0.0132635	-2.07527	Mst84Da
FBgn0034889	0.184452	7.97481	3.93638	0.0020172	0.0132635	-2.07475	CG11293
FBgn0019890	0.136651	9.21897	3.93561	0.00202	0.0132683	-2.07617	Smg5
FBgn0030073	-0.165633	7.86126	-3.93339	0.00202807	0.013306	-2.08024	CG10962
FBgn0262573	0.135967	8.10794	3.93316	0.00202891	0.013306	-2.08067	orb2
FBgn0052000	0.216539	8.8938	3.93322	0.0020287	0.013306	-2.08056	CG32000
FBgn0031483	0.132703	7.49051	3.93188	0.00203358	0.0133236	-2.08302	CG9641
FBgn0034218	0.143125	7.7956	3.93184	0.00203371	0.0133236	-2.08308	CG18467
FBgn0036556	0.157995	10.4327	3.93032	0.00203928	0.0133532	-2.08588	CG5830
FBgn0033756	-0.171627	7.46029	-3.92863	0.00204547	0.0133868	-2.08899	CG17760
FBgn0038099	-0.12137	6.656	-3.92631	0.002054	0.0134356	-2.09324	CG7091
FBgn0025455	0.210133	7.65634	3.92556	0.00205677	0.0134468	-2.09462	CycT
FBgn0032881	-0.177681	9.75232	-3.92515	0.00205827	0.0134496	-2.09537	CG9319
FBgn0004862	-0.140394	7.3289	-3.92412	0.00206208	0.0134553	-2.09726	bap
FBgn0029925	0.124848	8.60749	3.92408	0.00206225	0.0134553	-2.09734	CG3040
FBgn0260749	0.123129	8.52235	3.92405	0.00206234	0.0134553	-2.09739	Utx
FBgn0033558	0.119806	6.94313	3.9237	0.00206364	0.0134569	-2.09804	CG12344
FBgn0028737	0.113223	13.6827	3.92191	0.00207031	0.0134934	-2.10133	Ef1beta
FBgn0030678	-0.152095	8.03418	-3.92155	0.00207164	0.0134951	-2.10199	CG11679
FBgn0053658	-0.111393	6.22941	-3.92017	0.00207677	0.0135215	-2.10452	CG33658
FBgn0036953	-0.141093	6.67846	-3.91947	0.00207938	0.0135261	-2.1058	CG17145
FBgn0053123	-0.14072	9.71369	-3.91941	0.00207961	0.0135261	-2.10592	CG33123
FBgn0035160	-0.136088	7.66391	-3.91906	0.00208094	0.0135277	-2.10657	CG13897
FBgn0053970	-0.209264	9.35223	-3.91752	0.0020867	0.0135581	-2.1094	CG33970
FBgn0034396	0.144299	8.45159	3.91701	0.0020886	0.0135636	-2.11033	CG15097
FBgn0032923	-0.133658	9.06839	-3.91642	0.0020908	0.0135708	-2.11141	CG9248
FBgn0053080	-0.15219	9.99683	-3.916	0.00209241	0.0135743	-2.11219	CG33080
FBgn0035237	0.166802	9.50208	3.91462	0.00209759	0.0136009	-2.11472	CG13917
FBgn0013763	-0.125745	13.0381	-3.91318	0.00210303	0.0136292	-2.11737	CG5210
FBgn0035405	0.13507	7.91751	3.91127	0.00211027	0.0136691	-2.12089	pfk
FBgn0032633	0.135671	8.16782	3.90653	0.00212831	0.0137789	-2.12959	CG6860
FBgn0032974	0.146749	9.88093	3.9037	0.00213917	0.0138279	-2.1348	CG3651
FBgn0037061	0.126877	9.37987	3.90382	0.00213869	0.0138279	-2.13457	CG12975
FBgn0038617	-0.139696	8.95033	-3.90391	0.00213834	0.0138279	-2.1344	CG12333
FBgn0031741	-0.16513	6.94239	-3.90243	0.00214406	0.0138453	-2.13713	CG11034
FBgn0039923	0.138605	10.0858	3.90259	0.00214342	0.0138453	-2.13683	MED26
FBgn0020386	0.150575	9.78226	3.89814	0.00216066	0.0139454	-2.14502	Pk61C
FBgn0031821	0.149469	9.6062	3.89773	0.00216225	0.0139485	-2.14577	CG9542
FBgn0036733	0.153268	7.97186	3.89644	0.00216726	0.0139737	-2.14814	U4-U6-60K
FBgn0032247	-0.141192	7.99878	-3.89408	0.00217647	0.0140116	-2.15247	CG5188
FBgn0033188	0.168094	11.3332	3.89423	0.00217589	0.0140116	-2.1522	CG1600
FBgn0033802	0.165394	9.92712	3.89419	0.00217607	0.0140116	-2.15228	CG17724
FBgn0035876	-0.145158	8.97737	-3.89139	0.00218705	0.0140725	-2.15743	pex2
FBgn0002789	-0.293508	11.4251	-3.88917	0.0021958	0.0141216	-2.16151	Mp20
FBgn0033031	0.120081	9.95221	3.8875	0.00220241	0.0141569	-2.16458	CG8245
FBgn0003517	0.11368	14.087	3.88567	0.00220965	0.014189	-2.16794	sta
FBgn0025373	-0.157256	8.68769	-3.88587	0.00220887	0.014189	-2.16758	Fpps
FBgn0034490	0.2263	7.39723	3.88272	0.00222142	0.0142501	-2.17337	CG9864
FBgn0029955	0.145653	7.85493	3.88108	0.00222798	0.0142722	-2.17638	CG15478
FBgn0033728	-0.236668	9.8194	-3.88101	0.00222826	0.0142722	-2.17651	Cpr49Ae
FBgn0051675	-0.135151	8.06355	-3.88129	0.00222715	0.0142722	-2.176	CG31675
FBgn0039438	-0.178071	6.89546	-3.8788	0.00223716	0.0143142	-2.18058	TwdlO
FBgn0262517	0.132971	9.1197	3.87905	0.00223613	0.0143142	-2.18012	l(3)76BDr
FBgn0259982	0.135969	7.37927	3.87853	0.00223823	0.0143142	-2.18107	l(2)35Cc
FBgn0053178	0.141084	10.7984	3.87697	0.00224453	0.0143472	-2.18395	CG33178
FBgn0042630	0.189866	7.39759	3.87569	0.00224971	0.0143731	-2.1863	Sox21b
FBgn0034387	0.14166	9.44518	3.87501	0.00225247	0.0143834	-2.18755	Cyp12b2
FBgn0000239	-0.1433	9.40208	-3.87355	0.00225839	0.0144083	-2.19024	bur
FBgn0053143	0.128432	9.40731	3.87349	0.00225865	0.0144083	-2.19036	CG33143
FBgn0032483	-0.141383	6.60125	-3.87286	0.00226121	0.0144174	-2.19151	CG15482
FBgn0002534	-0.138704	7.14583	-3.87154	0.0022666	0.0144444	-2.19395	Lcp3
FBgn0027084	-0.164272	10.9127	-3.87051	0.00227079	0.0144471	-2.19583	Aats-lys
FBgn0029885	0.118026	9.2045	3.87109	0.00226843	0.0144471	-2.19477	CG3224
FBgn0039642	0.13045	7.99779	3.87032	0.00227159	0.0144471	-2.19619	CG11882
FBgn0043841	-0.139689	10.0177	-3.87073	0.00226989	0.0144471	-2.19543	vir-1
FBgn0243511	-0.110538	8.11275	-3.86958	0.00227459	0.0144589	-2.19754	psidin
FBgn0004514	0.170347	7.33386	3.86867	0.00227835	0.0144754	-2.19923	TyrR
FBgn0038467	-0.172516	8.32401	-3.86832	0.00227976	0.0144771	-2.19986	CG3590
FBgn0028372	0.138824	8.69324	3.86789	0.00228152	0.0144777	-2.20065	isopeptidase-T-3
FBgn0031216	0.140168	8.92932	3.86718	0.00228445	0.0144777	-2.20196	CG11376
FBgn0035170	0.170751	8.60897	3.86745	0.00228334	0.0144777	-2.20147	dpr20
FBgn0036106	0.157468	12.6917	3.86771	0.00228229	0.0144777	-2.201	CG6409
FBgn0035107	0.18245	9.84451	3.86644	0.00228749	0.0144897	-2.20332	mri
FBgn0030358	0.139371	8.69211	3.86501	0.0022934	0.0145199	-2.20595	CG10362
FBgn0032150	0.172076	7.50104	3.86365	0.00229903	0.0145482	-2.20846	CG13123
FBgn0030735	0.116052	9.67135	3.86333	0.00230036	0.0145494	-2.20905	CG3632
FBgn0032817	0.142345	9.07699	3.86102	0.00230997	0.0146028	-2.21331	CG10631
FBgn0036878	-0.13843	6.96452	-3.8606	0.00231172	0.0146066	-2.21408	Cpr76Ba
FBgn0031098	0.146958	8.45995	3.85843	0.00232074	0.0146562	-2.21806	CG17068
FBgn0039157	0.139258	7.37438	3.85669	0.00232806	0.0146951	-2.22128	Myo95E
FBgn0031562	-0.113648	7.43986	-3.85431	0.00233805	0.0147508	-2.22565	CG3604
FBgn0051646	0.168375	8.07671	3.85299	0.00234364	0.0147786	-2.22809	CG31646
FBgn0020392	-0.11356	8.97685	-3.85231	0.0023465	0.0147893	-2.22934	Nmt
FBgn0028426	-0.138745	8.15682	-3.85124	0.00235103	0.0148105	-2.23131	JhI-1
FBgn0031835	0.192169	10.1186	3.85066	0.00235348	0.0148185	-2.23237	CG11319
FBgn0039261	0.121249	8.8084	3.84858	0.00236235	0.0148669	-2.23621	CG6422
FBgn0033793	0.146826	9.18892	3.84759	0.00236657	0.014886	-2.23804	CG3955
FBgn0034053	0.147223	8.31315	3.84601	0.00237331	0.014921	-2.24094	Cyp4aa1
FBgn0014865	-0.670408	12.1675	-3.84448	0.00237984	0.0149417	-2.24375	Mtk
FBgn0027556	-0.26091	8.40111	-3.84441	0.00238016	0.0149417	-2.24389	CG4928
FBgn0036160	-0.153541	6.55143	-3.8449	0.00237806	0.0149417	-2.24298	CG12289
FBgn0027574	0.157609	7.48215	3.84293	0.00238652	0.014968	-2.24661	CG5815
[truncated: 10,401 more rows]

## Sheet: InR Gene Expression
ID	logFC	AveExpr	t	P.Value	adj.P.Val	B	symbol
FBgn0000047	3.9709	10.1783	20.9607	2.10776e-12	2.65957e-08	17.9636	Act88F
FBgn0003996	0.790111	7.98348	17.432	2.90763e-11	1.22295e-07	15.7843	w
FBgn0039313	-2.19761	10.5787	-17.5712	2.59839e-11	1.22295e-07	15.881	CG11892
FBgn0032913	-2.74396	10.3146	-16.4642	6.50547e-11	1.74992e-07	15.0838	CG9259
FBgn0035781	-1.65163	11.5888	-16.3896	6.93421e-11	1.74992e-07	15.0277	CG8560
FBgn0038973	-1.85623	12.5846	-15.6959	1.27168e-10	2.67435e-07	14.4906	CG18594
FBgn0003863	-0.418345	13.8916	-15.0077	2.37779e-10	4.28613e-07	13.9291	alphaTry
FBgn0029833	0.463872	9.74837	14.6169	3.43153e-10	5.04766e-07	13.5966	CG5941
FBgn0039312	-2.17438	10.4757	-14.5584	3.62785e-10	5.04766e-07	13.546	CG10514
FBgn0259998	-1.50103	11.1409	-14.4561	4.00036e-10	5.04766e-07	13.4569	CG17571
FBgn0014931	0.428182	9.95122	14.2427	4.91539e-10	5.6384e-07	13.2687	CG2678
FBgn0033059	0.368686	10.7242	13.9852	6.32488e-10	6.29932e-07	13.0374	CG7845
FBgn0035154	-1.41883	10.6321	-13.9591	6.49003e-10	6.29932e-07	13.0136	CG3344
FBgn0039760	-1.31885	8.83898	-13.8518	7.21837e-10	6.50581e-07	12.9157	CG9682
FBgn0030837	-1.61422	11.2172	-12.4661	3.05307e-09	2.56824e-06	11.5708	CG8661
FBgn0010357	-0.490377	13.7366	-12.2974	3.6723e-09	2.89607e-06	11.3965	betaTry
FBgn0011555	-1.56638	11.5167	-12.2138	4.02741e-09	2.98929e-06	11.3092	thetaTry
FBgn0011834	-1.29165	10.6657	-12.0517	4.8243e-09	3.38184e-06	11.1381	Ser6
FBgn0028920	-1.0092	12.4862	-11.9539	5.38484e-09	3.39729e-06	11.0337	CG8997
FBgn0035926	-0.940892	12.8013	-11.9675	5.30284e-09	3.39729e-06	11.0483	CG5804
FBgn0032144	-1.26796	12.5119	-11.7863	6.51173e-09	3.91262e-06	10.8529	CG17633
FBgn0011236	0.339926	10.4351	11.5911	8.14792e-09	4.6732e-06	10.6391	ken
FBgn0035999	0.415754	9.36858	11.5358	8.68709e-09	4.76581e-06	10.5778	CG3552
FBgn0051681	-1.27882	10.1614	-11.3595	1.06722e-08	5.61093e-06	10.3808	CG31681
FBgn0010786	0.334644	11.5194	11.271	1.18461e-08	5.97897e-06	10.2808	l(3)02640
FBgn0028743	0.376308	8.61202	11.2269	1.2482e-08	6.05759e-06	10.2306	CG5036
FBgn0023522	0.334616	11.1659	11.089	1.4712e-08	6.87543e-06	10.0726	CG11596
FBgn0034642	-0.712585	7.75844	-11.0231	1.59237e-08	7.11622e-06	9.99641	CG15674
FBgn0051410	-0.94811	12.4634	-11.0009	1.63552e-08	7.11622e-06	9.97066	Npc2e
FBgn0040705	-1.18923	7.96713	-10.8447	1.97663e-08	8.31372e-06	9.78801	CG15434
FBgn0032074	-0.969763	11.1832	-10.7962	2.09725e-08	8.53647e-06	9.73083	Tsp29Fa
NA	0.264722	13.4413	10.6927	2.3817e-08	9.39135e-06	9.6079	NA
FBgn0033826	-1.72415	10.7712	-10.6564	2.49105e-08	9.52486e-06	9.56448	CG4734
FBgn0010387	-1.10878	12.4803	-10.49	3.06374e-08	1.11466e-05	9.36405	Dbi
FBgn0038353	-0.962258	12.1985	-10.4828	3.09186e-08	1.11466e-05	9.35519	CG5399
FBgn0004436	0.245804	10.9389	10.3444	3.68006e-08	1.27974e-05	9.18615	UbcD6
FBgn0034289	-2.2154	10.6768	-10.308	3.85402e-08	1.27974e-05	9.14127	CG10910
FBgn0039325	-1.33465	9.84903	-10.3152	3.81864e-08	1.27974e-05	9.15023	CG10560
FBgn0037934	-1.25808	9.56862	-10.1975	4.43662e-08	1.43542e-05	9.00436	CG6830
FBgn0002868	-0.553151	13.9756	-10.1121	4.95044e-08	1.5246e-05	8.89766	MtnA
FBgn0033138	-0.859067	8.72126	-10.1116	4.95391e-08	1.5246e-05	8.89697	Tsp42Eq
FBgn0024364	0.45057	10.4144	10.0102	5.64746e-08	1.6572e-05	8.76924	CG11417
FBgn0036422	-1.13492	11.6254	-10.0154	5.60996e-08	1.6572e-05	8.77574	CG3868
FBgn0250815	-0.448076	14.0663	-9.98679	5.82214e-08	1.66963e-05	8.73953	Jon65Aiv
FBgn0044047	0.614473	8.14732	9.95941	6.0333e-08	1.69174e-05	8.70476	Ilp6
FBgn0037176	-0.874605	7.53564	-9.8965	6.54994e-08	1.79668e-05	8.62454	CG14456
FBgn0004047	-0.301392	14.2031	-9.87061	6.77596e-08	1.81913e-05	8.5914	Yp3
FBgn0029999	0.236664	9.10401	9.82549	7.18982e-08	1.88422e-05	8.53346	CG1575
FBgn0052834	-0.799942	8.44463	-9.81217	7.31707e-08	1.88422e-05	8.51631	CG32834
FBgn0031581	-0.832525	8.38246	-9.76832	7.75298e-08	1.95654e-05	8.45972	CG10039
FBgn0034335	0.347638	11.5992	9.67427	8.78331e-08	2.02251e-05	8.33759	GstE1
FBgn0039868	0.269175	10.5368	9.70804	8.39765e-08	2.02251e-05	8.38156	CG11563
FBgn0040959	-1.61935	11.1324	-9.70514	8.43002e-08	2.02251e-05	8.37779	Peritrophin-15a
FBgn0040985	0.683184	12.0257	9.66336	8.9119e-08	2.02251e-05	8.32336	CG6115
FBgn0051233	-1.22915	10.7596	-9.65798	8.97611e-08	2.02251e-05	8.31633	CG31233
FBgn0250874	0.264331	10.0862	9.69182	8.58057e-08	2.02251e-05	8.36046	ttm50
FBgn0032235	-0.939753	10.2297	-9.62944	9.32455e-08	2.02857e-05	8.27902	CG5096
FBgn0039507	0.282456	9.8781	9.63432	9.26403e-08	2.02857e-05	8.2854	mrt
FBgn0035779	-1.38004	10.3276	-9.59666	9.74269e-08	2.08361e-05	8.23604	CG8562
FBgn0035678	-0.670572	8.67917	-9.54786	1.04022e-07	2.18758e-05	8.17182	CG10469
FBgn0000146	0.33431	10.8023	9.52345	1.07495e-07	2.22357e-05	8.13961	aub
FBgn0035524	0.284328	10.9893	9.50177	1.10684e-07	2.25259e-05	8.11093	CG11583
FBgn0051077	-0.538883	8.64729	-9.47168	1.15275e-07	2.3088e-05	8.07104	CG31077
FBgn0001091	0.325861	13.0854	9.44734	1.19138e-07	2.34889e-05	8.03869	Gapdh1
FBgn0259878	0.307219	7.57909	9.42973	1.22017e-07	2.36863e-05	8.01525	Fs
FBgn0086912	0.309653	11.195	9.37722	1.31048e-07	2.50541e-05	7.94511	mbm
FBgn0010425	-0.86451	13.1821	-9.34506	1.36926e-07	2.50827e-05	7.90199	epsilonTry
FBgn0034490	-0.554344	10.019	-9.34821	1.3634e-07	2.50827e-05	7.90622	CG9864
FBgn0036754	0.353105	9.65391	9.3438	1.37162e-07	2.50827e-05	7.90031	CG5589
FBgn0025692	-1.12399	9.80125	-9.3061	1.44422e-07	2.60331e-05	7.8496	CG3814
FBgn0027291	0.372706	12.4781	9.28434	1.48797e-07	2.6444e-05	7.82025	l(1)G0156
FBgn0034493	0.326625	7.62983	9.25528	1.5486e-07	2.71393e-05	7.78097	CG8908
FBgn0052277	-0.59699	7.49248	-9.21567	1.63546e-07	2.82689e-05	7.72727	CG32277
FBgn0028274	0.225715	10.505	9.19435	1.68433e-07	2.87202e-05	7.69829	ns3
FBgn0031782	0.330332	8.83263	9.16719	1.74883e-07	2.94223e-05	7.66129	WDR79
FBgn0032075	-0.789551	11.4516	-9.1266	1.85015e-07	3.07173e-05	7.60582	Tsp29Fb
FBgn0039872	-0.959529	9.40116	-9.08435	1.9622e-07	3.21547e-05	7.54788	salt
FBgn0030551	0.28557	11.6502	9.0226	2.13909e-07	3.30231e-05	7.46279	CG11674
FBgn0031401	0.257701	10.3191	9.02028	2.14606e-07	3.30231e-05	7.45958	CG7082
FBgn0037870	-0.508661	7.87895	-9.04234	2.08076e-07	3.30231e-05	7.49005	CG18577
FBgn0039342	-1.20695	12.6127	-9.02356	2.1362e-07	3.30231e-05	7.46412	CG5107
FBgn0041156	-0.417591	7.35111	-9.05078	2.05635e-07	3.30231e-05	7.50168	exex
FBgn0051198	-0.938307	11.7497	-8.9926	2.23101e-07	3.39168e-05	7.42129	CG31198
FBgn0034318	-1.66755	9.58712	-8.92532	2.45273e-07	3.68436e-05	7.32779	CG14500
FBgn0085330	-1.02495	8.66751	-8.91452	2.49042e-07	3.69695e-05	7.31274	CG34301
FBgn0046302	-1.00007	10.9213	-8.89293	2.56764e-07	3.76727e-05	7.28259	CG10650
FBgn0031008	0.424583	10.8526	8.86076	2.68742e-07	3.89768e-05	7.23756	CG8010
FBgn0035094	-0.715481	8.6434	-8.85004	2.72866e-07	3.91253e-05	7.22251	CG9380
FBgn0001565	0.299263	11.0948	8.82486	2.82811e-07	3.96501e-05	7.18715	Hlc
FBgn0038638	-0.500695	8.83764	-8.8275	2.81752e-07	3.96501e-05	7.19085	CG7702
FBgn0038790	-1.42165	11.0283	-8.81453	2.87e-07	3.97952e-05	7.17262	MtnC
FBgn0032669	-1.88752	9.40653	-8.79597	2.94695e-07	4.04181e-05	7.14647	CG15155
FBgn0029857	0.211252	9.28907	8.76865	3.06419e-07	4.15741e-05	7.1079	wuho
FBgn0039049	-0.913569	10.8191	-8.73924	3.19593e-07	4.20066e-05	7.06628	CG6726
FBgn0039306	0.351399	10.5306	8.74241	3.18144e-07	4.20066e-05	7.07077	CG11859
FBgn0039914	0.42311	10.3552	8.74121	3.18693e-07	4.20066e-05	7.06907	mav
FBgn0039154	-1.32997	9.26581	-8.70277	3.36766e-07	4.38074e-05	7.01451	Npc2f
FBgn0034542	0.241911	8.90711	8.69355	3.41259e-07	4.39388e-05	7.0014	Fem-1
FBgn0010926	0.267256	9.71681	8.68619	3.44893e-07	4.39582e-05	6.99091	l(3)07882
FBgn0010220	0.348546	9.50243	8.60567	3.8741e-07	4.78375e-05	6.87585	Dbp45A
FBgn0031004	-0.756871	8.79185	-8.59353	3.94286e-07	4.78375e-05	6.85843	CG7992
FBgn0034748	0.435374	9.12715	8.61205	3.83847e-07	4.78375e-05	6.885	CG17807
FBgn0035164	0.262018	9.30987	8.59669	3.92483e-07	4.78375e-05	6.86297	CG13901
FBgn0039761	-1.25859	10.5234	-8.6125	3.83599e-07	4.78375e-05	6.88564	CG18404
FBgn0038740	-0.953589	9.21182	-8.55621	4.16239e-07	5.002e-05	6.80476	CG4562
FBgn0031248	-1.30143	9.67715	-8.54419	4.23581e-07	5.00313e-05	6.78744	CG11912
FBgn0032051	0.273101	10.5871	8.54144	4.25282e-07	5.00313e-05	6.78347	CG13097
FBgn0034641	0.245899	9.94847	8.52411	4.36158e-07	5.00313e-05	6.75845	mahj
FBgn0035670	-0.901114	12.4007	-8.5323	4.3098e-07	5.00313e-05	6.77028	CG10472
FBgn0039051	-0.67032	8.05339	-8.52607	4.34912e-07	5.00313e-05	6.76128	CG17109
FBgn0031406	-1.38262	9.24994	-8.51661	4.40954e-07	5.01258e-05	6.74761	CG17012
FBgn0025140	0.299475	11.1844	8.50459	4.48759e-07	5.05575e-05	6.73022	pit
FBgn0036766	-1.52033	11.3999	-8.49551	4.54747e-07	5.07787e-05	6.71708	CG5506
FBgn0031143	-0.432684	10.7621	-8.47241	4.70377e-07	5.16106e-05	6.68358	CG1532
FBgn0039472	-1.42852	10.4218	-8.47315	4.69864e-07	5.16106e-05	6.68466	CG17192
FBgn0027364	0.600299	8.97957	8.43938	4.9371e-07	5.23499e-05	6.63558	Six4
FBgn0038948	0.234864	9.41864	8.4409	4.92609e-07	5.23499e-05	6.63779	PSR
FBgn0039873	-1.21067	9.36365	-8.44689	4.88301e-07	5.23499e-05	6.6465	Smvt
FBgn0065032	-0.746053	8.93682	-8.44308	4.91034e-07	5.23499e-05	6.64097	Arpc3B
FBgn0011832	-0.820083	8.98511	-8.42459	5.04553e-07	5.30537e-05	6.61403	Ser12
FBgn0260392	0.208716	10.0028	8.41311	5.13142e-07	5.3511e-05	6.59729	CG42518
FBgn0260401	0.208716	10.0028	8.41311	5.13142e-07	5.3511e-05	6.59729	MED9
FBgn0033221	-0.734078	9.55536	-8.40399	5.20076e-07	5.37895e-05	6.58397	CG12825
FBgn0032444	0.221725	12.0147	8.39465	5.27276e-07	5.40908e-05	6.57033	CG5525
FBgn0030177	0.306965	10.1024	8.38334	5.36141e-07	5.41421e-05	6.55379	CG2972
FBgn0032194	0.246001	10.2291	8.3819	5.37276e-07	5.41421e-05	6.55169	CG4901
FBgn0033454	0.287887	9.8713	8.3723	5.44939e-07	5.41421e-05	6.53764	CG1671
FBgn0037678	-1.15761	10.3609	-8.37528	5.42552e-07	5.41421e-05	6.542	CG16749
FBgn0033169	0.279815	9.82693	8.34651	5.66103e-07	5.58054e-05	6.49983	CG11123
FBgn0261016	0.431427	8.82041	8.33809	5.73198e-07	5.60667e-05	6.48747	clos
FBgn0014455	0.297159	12.9045	8.32912	5.80866e-07	5.61735e-05	6.47427	Ahcy13
FBgn0039930	0.272735	10.4299	8.32642	5.83193e-07	5.61735e-05	6.4703	CG11077
FBgn0031213	0.190284	11.23	8.3167	5.91648e-07	5.65562e-05	6.45602	galectin
FBgn0033774	-0.603199	13.8932	-8.31139	5.9633e-07	5.65751e-05	6.44819	CG12374
FBgn0034792	0.214202	9.7168	8.25153	6.51835e-07	6.13795e-05	6.35981	CG3499
FBgn0031952	0.258052	9.20188	8.22407	6.79092e-07	6.25458e-05	6.31911	cdc14
FBgn0037489	0.347262	10.1874	8.23165	6.71449e-07	6.25458e-05	6.33036	CG1234
FBgn0053337	-0.500943	7.19814	-8.22681	6.76316e-07	6.25458e-05	6.32318	CG33337
FBgn0011554	-0.552459	8.75576	-8.19707	7.0707e-07	6.41857e-05	6.27899	etaTry
FBgn0036363	0.416838	7.21541	8.19968	7.04309e-07	6.41857e-05	6.28288	CG10140
FBgn0032382	0.526468	9.49656	8.18326	7.21839e-07	6.50583e-05	6.25845	CG14935
FBgn0043070	0.283322	9.44404	8.16999	7.36355e-07	6.58959e-05	6.23866	MESK2
FBgn0039453	0.414428	7.61242	8.15785	7.49889e-07	6.66345e-05	6.22055	CG6403
FBgn0038922	0.323839	10.9756	8.1522	7.56276e-07	6.67321e-05	6.21212	CG6439
FBgn0010043	-0.36125	7.49734	-8.11643	7.98098e-07	6.96761e-05	6.1586	GstD7
FBgn0030235	0.208494	10.0585	8.11428	8.00684e-07	6.96761e-05	6.15538	Imp
FBgn0029095	0.340732	8.92351	8.07994	8.43267e-07	7.04668e-05	6.10385	aru
FBgn0030481	0.288216	9.89138	8.08633	8.35167e-07	7.04668e-05	6.11345	CG1662
FBgn0031579	-0.729324	9.90219	-8.10021	8.17855e-07	7.04668e-05	6.13428	CG15422
FBgn0037270	0.286928	12.1319	8.09315	8.26609e-07	7.04668e-05	6.12369	CG9769
FBgn0037566	0.222474	10.5649	8.09686	8.21995e-07	7.04668e-05	6.12926	mRpL1
FBgn0050410	0.249596	10.7393	8.07994	8.43278e-07	7.04668e-05	6.10383	CG30410
FBgn0030775	-0.83304	11.0032	-8.03811	8.9839e-07	7.45782e-05	6.04085	CG9673
FBgn0030081	0.245722	9.6075	8.0122	9.34431e-07	7.70631e-05	6.0017	CG7246
FBgn0022288	0.281469	11.7357	8.00102	9.50453e-07	7.7373e-05	5.98478	l(2)09851
FBgn0261286	0.240226	9.56404	8.00419	9.45878e-07	7.7373e-05	5.98958	Mat89Ba
FBgn0087002	-0.315065	13.7032	-7.99512	9.59013e-07	7.75694e-05	5.97586	Rfabg
FBgn0034436	-0.820497	8.99774	-7.96309	1.00698e-06	7.9783e-05	5.92727	CG11961
FBgn0037715	-0.327252	11.441	-7.9602	1.01144e-06	7.9783e-05	5.92287	CG9399
FBgn0051148	-1.0338	10.0282	-7.96004	1.01167e-06	7.9783e-05	5.92264	CG31148
FBgn0052483	-0.785005	8.86537	-7.96676	1.00136e-06	7.9783e-05	5.93284	CG32483
FBgn0035063	0.316066	9.58933	7.92395	1.06905e-06	8.37843e-05	5.8677	Eap
FBgn0015949	0.24117	9.31461	7.91366	1.08601e-06	8.45884e-05	5.85202	hrg
FBgn0030234	-0.73168	9.12001	-7.90956	1.09287e-06	8.46003e-05	5.84575	CG15211
FBgn0052656	-0.952926	11.1827	-7.89632	1.11527e-06	8.58077e-05	5.82554	Muc11A
FBgn0034879	0.343442	9.96665	7.88599	1.1331e-06	8.66509e-05	5.80974	Rrp4
FBgn0038701	-1.23378	10.086	-7.88197	1.14011e-06	8.66623e-05	5.80359	CG18493
FBgn0033988	0.35501	10.822	7.87189	1.1579e-06	8.74875e-05	5.78816	pcs
FBgn0039829	0.259072	9.33538	7.86405	1.17195e-06	8.8022e-05	5.77615	CG15561
FBgn0001942	0.204548	13.2071	7.79914	1.29533e-06	9.55817e-05	5.67638	eIF-4a
FBgn0038425	0.214073	9.00215	7.80023	1.29314e-06	9.55817e-05	5.67807	CG14881
FBgn0000171	0.285476	10.7364	7.7781	1.33818e-06	9.64866e-05	5.64393	bel
FBgn0031148	0.302687	11.1123	7.77821	1.33797e-06	9.64866e-05	5.64409	CG1753
FBgn0033184	0.334064	9.8421	7.77992	1.33443e-06	9.64866e-05	5.64674	CG12736
FBgn0037923	0.245404	7.66655	7.78806	1.3177e-06	9.64866e-05	5.65931	CG6813
FBgn0030432	0.244166	10.7804	7.75724	1.38217e-06	9.74313e-05	5.61168	CG4404
FBgn0032665	-0.687697	9.1997	-7.75927	1.37781e-06	9.74313e-05	5.61483	CG15152
FBgn0033096	-0.445546	7.22011	-7.75826	1.37998e-06	9.74313e-05	5.61327	ZIP1
FBgn0037073	0.282854	11.2647	7.7594	1.37753e-06	9.74313e-05	5.61503	CG7338
FBgn0040060	-0.365661	13.9206	-7.74792	1.40231e-06	9.83021e-05	5.59725	yip7
FBgn0034663	-1.46649	11.4358	-7.73747	1.42525e-06	9.93583e-05	5.58107	CG4363
FBgn0039182	0.236743	10.8516	7.73389	1.4332e-06	9.93635e-05	5.57552	CG5728
FBgn0030756	-0.457684	7.79571	-7.72605	1.45079e-06	0.000100033	5.56336	CG9903
FBgn0040299	-0.390437	7.579	-7.7191	1.46655e-06	0.00010057	5.55258	Myo28B1
FBgn0031516	-0.356746	8.89203	-7.71428	1.47761e-06	0.000100781	5.54508	CG9663
FBgn0261609	0.281361	11.8237	7.70257	1.50478e-06	0.000100997	5.5269	eIF-2alpha
FBgn0032701	0.312392	9.74064	7.7035	1.50263e-06	0.000100997	5.52833	CG10341
FBgn0034817	0.375949	9.21531	7.70705	1.49433e-06	0.000100997	5.53386	Art7
FBgn0034292	-0.968396	10.056	-7.69081	1.53263e-06	0.000102321	5.50861	CG5767
FBgn0032138	0.402743	11.788	7.68599	1.54421e-06	0.000102552	5.5011	CG4364
FBgn0261535	0.252438	9.55314	7.6806	1.55725e-06	0.000102876	5.49271	l(2)34Fd
FBgn0039091	-0.979978	9.07504	-7.66496	1.59576e-06	0.000104871	5.46833	CG10182
FBgn0023509	0.257198	8.81846	7.65718	1.6153e-06	0.000105105	5.45619	mip130
FBgn0030688	-0.951931	10.6242	-7.65691	1.61598e-06	0.000105105	5.45577	CG8952
FBgn0040718	-0.777978	9.03777	-7.6523	1.62769e-06	0.000105324	5.44856	CG15353
FBgn0001330	0.190858	9.27849	7.64897	1.63618e-06	0.000105333	5.44337	kz
FBgn0033451	0.164736	9.6561	7.63423	1.6744e-06	0.000107246	5.42032	CG1665
FBgn0031678	0.369742	8.63378	7.62635	1.69522e-06	0.000107489	5.40799	CG31918
FBgn0040078	0.22446	10.6507	7.62703	1.69342e-06	0.000107489	5.40905	pont
FBgn0031741	-0.570128	9.6895	-7.58788	1.8008e-06	0.000113612	5.34767	CG11034
FBgn0036886	0.376541	10.3126	7.57968	1.82416e-06	0.000114514	5.3348	CG9300
FBgn0027330	0.317549	9.53592	7.57243	1.84512e-06	0.000114675	5.3234	l(1)G0020
FBgn0031048	0.232658	10.9708	7.56319	1.87217e-06	0.000114675	5.30886	CG12237
FBgn0035153	0.248878	9.92187	7.56586	1.86431e-06	0.000114675	5.31306	CG3371
FBgn0038098	-0.988495	10.5127	-7.57555	1.83607e-06	0.000114675	5.32831	CG7381
FBgn0038718	-1.37525	9.33557	-7.569	1.85512e-06	0.000114675	5.318	CG17752
FBgn0040227	0.208411	12.4798	7.54788	1.91795e-06	0.000116911	5.28473	eIF-3p66
FBgn0032408	0.223321	10.6292	7.54463	1.92781e-06	0.000116948	5.27961	CG6712
FBgn0030073	-0.311868	8.29281	-7.53463	1.95849e-06	0.00011824	5.26384	CG10962
FBgn0039828	0.262624	10.5629	7.516	2.01703e-06	0.000121195	5.23442	CG1542
FBgn0039641	0.298366	7.89034	7.51167	2.03092e-06	0.000121451	5.22757	CG14511
FBgn0037329	0.227164	9.77334	7.5066	2.04726e-06	0.000121851	5.21956	CG12162
FBgn0029879	0.165727	9.25194	7.4906	2.09984e-06	0.000124393	5.19423	Apc7
FBgn0015039	-1.97418	11.0921	-7.48232	2.1276e-06	0.000125449	5.1811	Cyp9b2
FBgn0033929	0.248718	9.87103	7.4746	2.15382e-06	0.000126404	5.16887	Tfb1
FBgn0040350	-0.66154	8.01707	-7.43716	2.28595e-06	0.000133538	5.10937	CG3690
FBgn0010246	-0.63082	10.6212	-7.42989	2.31256e-06	0.000134469	5.0978	Myo61F
FBgn0065035	0.232281	9.77831	7.42463	2.33203e-06	0.000134979	5.08942	AlkB
FBgn0032815	0.380042	10.4428	7.40445	2.40833e-06	0.000138759	5.05724	CG10462
FBgn0010217	0.202551	13.689	7.37716	2.51574e-06	0.000140458	5.01362	ATPsyn-beta
FBgn0261675	-0.942101	9.6732	-7.38784	2.47314e-06	0.000140458	5.03069	Npc1b
FBgn0033083	0.2677	9.81432	7.38156	2.49808e-06	0.000140458	5.02066	Dpit47
FBgn0033473	0.388446	10.2637	7.37951	2.50631e-06	0.000140458	5.01737	CG12128
FBgn0261673	-0.818862	9.35749	-7.38368	2.48965e-06	0.000140458	5.02404	nemy
FBgn0038466	-0.619696	9.16719	-7.37917	2.50765e-06	0.000140458	5.01684	CG8907
FBgn0054026	-0.946964	10.6142	-7.38562	2.48191e-06	0.000140458	5.02715	CG34026
FBgn0038734	-0.326625	7.69804	-7.3661	2.5607e-06	0.000142195	4.9959	CG11453
FBgn0259166	0.178153	8.66316	7.36398	2.56938e-06	0.000142195	4.99252	CG42271
FBgn0039417	0.263139	9.79361	7.33937	2.67283e-06	0.000147274	4.95305	CG6073
FBgn0261261	-0.29339	9.7649	-7.32385	2.74028e-06	0.000148916	4.92812	plx
FBgn0015229	0.361542	11.1267	7.32301	2.74399e-06	0.000148916	4.92677	glec
FBgn0022029	0.327797	10.5368	7.32169	2.74984e-06	0.000148916	4.92464	l(2)k01209
FBgn0034664	-1.12559	10.3406	-7.32676	2.72753e-06	0.000148916	4.93279	CG4377
FBgn0033786	-0.642651	8.8875	-7.3158	2.77599e-06	0.00014969	4.91517	CG3884
FBgn0243517	0.208163	9.91597	7.30682	2.81639e-06	0.000151222	4.90072	CG4567
FBgn0035878	0.295773	10.3487	7.30166	2.83988e-06	0.000151837	4.89241	CG7182
FBgn0030748	-0.38072	7.86544	-7.2979	2.85716e-06	0.000152116	4.88635	Traf-like
FBgn0260444	0.27807	9.59062	7.28459	2.91909e-06	0.000154761	4.86489	CG18616
FBgn0026411	0.27807	9.59062	7.28459	2.91909e-06	0.000154761	4.86489	Lim1
FBgn0038903	0.219997	10.7084	7.27474	2.96586e-06	0.000156582	4.84899	RpI12
FBgn0036301	0.244247	10.4189	7.27206	2.97871e-06	0.000156606	4.84466	CG4069
FBgn0025629	0.242896	10.2832	7.26655	3.00533e-06	0.000157349	4.83576	CG4045
FBgn0027791	0.238077	9.26425	7.26283	3.02342e-06	0.000157643	4.82976	O-fut2
FBgn0033978	-1.14231	10.5635	-7.25583	3.05785e-06	0.000158782	4.81843	Cyp6a23
FBgn0033777	-0.309328	11.2763	-7.24953	3.08913e-06	0.000159748	4.80825	CG17574
FBgn0033427	0.251626	8.52869	7.24191	3.12747e-06	0.000161071	4.7959	CG1868
FBgn0033379	0.251637	9.95823	7.23716	3.15156e-06	0.000161652	4.78822	Mys45A
FBgn0041588	0.267748	8.85815	7.19725	3.36229e-06	0.000171763	4.72345	ligatin
FBgn0260965	0.187678	8.70741	7.1872	3.41761e-06	0.000173885	4.70711	CG42588
FBgn0034735	0.315868	8.64932	7.1823	3.44495e-06	0.000174175	4.69914	CG4610
FBgn0041164	0.252364	10.2708	7.18124	3.45091e-06	0.000174175	4.69741	armi
FBgn0035539	-0.283199	7.75173	-7.17872	3.46505e-06	0.000174191	4.69331	slow
FBgn0016123	-0.892184	10.1778	-7.17627	3.47891e-06	0.000174194	4.68932	Aph-4
FBgn0034237	0.211808	12.6421	7.17112	3.50818e-06	0.000174965	4.68093	eIF3-S9
FBgn0032919	0.270277	11.2819	7.15913	3.57732e-06	0.000177711	4.66139	CG9253
FBgn0039519	-0.899954	8.10973	-7.1302	3.75017e-06	0.000185567	4.61415	Cyp6a18
FBgn0037250	0.203764	10.7029	7.12661	3.77227e-06	0.000185932	4.60826	CG1074
FBgn0034814	0.271282	9.68965	7.1186	3.82197e-06	0.000187648	4.59516	CG9890
FBgn0011764	0.197619	11.1182	7.1151	3.8439e-06	0.000187994	4.58943	Dsp1
FBgn0000719	0.228612	10.4153	7.10481	3.90912e-06	0.000190072	4.57258	fog
FBgn0035360	-0.602533	9.08638	-7.10365	3.91652e-06	0.000190072	4.57068	CG1246
FBgn0032339	0.221487	9.53073	7.10102	3.93342e-06	0.000190161	4.56637	CG4705
FBgn0010226	0.232888	10.5802	7.09006	4.00469e-06	0.000192867	4.54839	GstS1
FBgn0034716	-0.741993	8.96117	-7.08683	4.02593e-06	0.000193153	4.54309	Oatp58Dc
FBgn0015268	0.188049	13.1518	7.0826	4.05394e-06	0.00019376	4.53615	Nap1
FBgn0029133	0.234445	12.16	7.07921	4.07654e-06	0.000193952	4.53058	REG
FBgn0031405	-0.345551	8.83887	-7.07739	4.0887e-06	0.000193952	4.5276	CG4267
FBgn0010383	0.382132	9.20385	7.07153	4.12822e-06	0.000194365	4.51796	Cyp18a1
FBgn0039055	0.203651	10.2045	7.07201	4.12495e-06	0.000194365	4.51876	Rassf
FBgn0030286	0.212209	9.84352	7.0635	4.18298e-06	0.000195485	4.50476	CG1657
FBgn0036134	0.210977	10.4031	7.06375	4.18127e-06	0.000195485	4.50517	fd68A
FBgn0052409	0.248974	10.4206	7.05799	4.22102e-06	0.000196534	4.49569	CG32409
FBgn0036258	0.20413	12.7636	7.05484	4.24289e-06	0.000196826	4.49052	CG5642
FBgn0011290	0.199877	10.0443	7.04322	4.32476e-06	0.000199298	4.47137	Taf12
FBgn0030316	0.296646	8.68498	7.04279	4.32776e-06	0.000199298	4.47068	CG11695
FBgn0039858	0.151523	12.3982	7.03827	4.36006e-06	0.000200056	4.46323	CycG
FBgn0035431	-0.535941	8.76633	-7.0344	4.38795e-06	0.000200606	4.45684	CG14968
FBgn0037899	0.382656	12.6741	7.0312	4.4111e-06	0.000200936	4.45157	RpL24-like
FBgn0033741	0.267022	11.4179	7.01449	4.53422e-06	0.000205203	4.42399	CG8545
FBgn0033934	0.198687	10.8551	7.01342	4.54223e-06	0.000205203	4.42222	CG17385
FBgn0040075	0.21884	10.8387	7.01191	4.55357e-06	0.000205203	4.41972	rept
FBgn0052029	-0.629097	7.64758	-7.00489	4.60659e-06	0.000206854	4.40812	Cpr66D
FBgn0003961	-1.39108	9.83265	-6.9943	4.68779e-06	0.000209754	4.39061	Uro
FBgn0036188	0.200814	9.11867	6.98755	4.74034e-06	0.000211165	4.37944	CG7339
FBgn0036974	0.166249	11.9891	6.98596	4.7528e-06	0.000211165	4.37681	eRF1
FBgn0032131	-0.654598	8.33441	-6.9827	4.77851e-06	0.000211191	4.37141	CG3841
FBgn0035152	0.279183	8.95897	6.98164	4.78687e-06	0.000211191	4.36966	CG3386
FBgn0030792	0.217194	10.1605	6.97868	4.81037e-06	0.000211489	4.36475	CG4789
FBgn0033124	-0.720443	8.79983	-6.97515	4.83851e-06	0.000211987	4.3589	Tsp42Ec
FBgn0051216	0.265584	8.39342	6.96786	4.89722e-06	0.000213817	4.34681	Naam
FBgn0036996	-1.61124	11.1656	-6.96465	4.92334e-06	0.000214216	4.34148	CG5932
FBgn0029885	0.27531	10.6688	6.94423	5.09273e-06	0.000217752	4.30758	CG3224
FBgn0031523	-0.746068	8.22869	-6.94095	5.1205e-06	0.000217752	4.30213	CG15408
FBgn0032178	0.230121	7.88403	6.95044	5.04053e-06	0.000217752	4.31791	Spn31A
FBgn0035824	0.23633	8.10029	6.94288	5.10407e-06	0.000217752	4.30535	CG8281
FBgn0037051	0.250694	11.296	6.94037	5.1254e-06	0.000217752	4.30117	CG10565
FBgn0050108	0.335328	8.1366	6.95093	5.03648e-06	0.000217752	4.31872	CG30108
FBgn0050349	0.309398	10.8902	6.94043	5.12491e-06	0.000217752	4.30127	CG30349
FBgn0032433	-0.661479	8.81452	-6.9297	5.21695e-06	0.000219425	4.28343	Oatp33Ea
FBgn0038938	-1.00158	9.13978	-6.93193	5.19768e-06	0.000219425	4.28714	CG7084
FBgn0052773	0.343609	7.85975	6.93063	5.20889e-06	0.000219425	4.28498	CG32773
FBgn0086130	0.202934	9.18666	6.9264	5.24557e-06	0.000219896	4.27794	KH1
FBgn0027329	0.272794	12.2081	6.92262	5.27863e-06	0.000220549	4.27165	Tcp-1zeta
FBgn0260660	0.454162	8.21064	6.91826	5.31703e-06	0.00022142	4.26438	mp
FBgn0033060	0.143562	8.60231	6.91352	5.35908e-06	0.000222437	4.25648	CG7849
FBgn0035265	-0.735202	8.34175	-6.90182	5.46432e-06	0.000226062	4.23699	CG18173
FBgn0028408	0.247277	8.06246	6.8844	5.62516e-06	0.00023107	4.2079	Drep-2
FBgn0035665	-0.310963	13.8531	-6.8844	5.62512e-06	0.00023107	4.20791	Jon65Aiii
FBgn0051072	-0.413188	9.35628	-6.88278	5.64031e-06	0.00023107	4.20521	Lerp
FBgn0051901	-0.951485	9.12513	-6.87776	5.6877e-06	0.000232257	4.19682	Mur29B
FBgn0040337	0.19742	9.44812	6.87424	5.72121e-06	0.000232872	4.19093	CG3021
FBgn0035515	0.211766	9.78165	6.87091	5.75309e-06	0.000233416	4.18536	CG14997
FBgn0029896	-0.663619	10.9275	-6.86731	5.78765e-06	0.000234066	4.17935	CG3168
FBgn0004587	0.188453	8.16811	6.86291	5.83032e-06	0.000235027	4.17199	B52
FBgn0039052	-0.890866	8.59677	-6.86103	5.84867e-06	0.000235027	4.16884	CG6733
FBgn0259834	0.286106	10.3661	6.85566	5.90137e-06	0.000236392	4.15984	out
FBgn0035726	0.201106	11.7172	6.84605	5.99689e-06	0.000239458	4.14374	CG9953
FBgn0033117	0.229672	9.40358	6.83941	6.06375e-06	0.000241364	4.13263	CG3358
FBgn0036769	0.218785	11.6282	6.82123	6.25104e-06	0.000247541	4.10212	Tsp74F
FBgn0043575	-1.274	10.3977	-6.82055	6.25818e-06	0.000247541	4.10098	PGRP-SC2
FBgn0052711	0.211486	9.72612	6.81252	6.34293e-06	0.00025011	4.08748	CG32711
FBgn0042103	-0.241424	6.99469	-6.81047	6.36476e-06	0.000250189	4.08404	CG18746
FBgn0085205	-0.751322	10.4801	-6.80856	6.3852e-06	0.000250213	4.08082	CG34176
FBgn0001186	0.240051	10.5708	6.78374	6.65672e-06	0.000253694	4.03906	Hex-A
FBgn0010501	0.1945	9.93382	6.7956	6.52554e-06	0.000253694	4.05902	Dcp-1
FBgn0027090	0.236661	10.795	6.78182	6.67821e-06	0.000253694	4.03582	Aats-gln
FBgn0031736	0.231527	9.27975	6.78966	6.59088e-06	0.000253694	4.04903	CG11030
FBgn0032818	0.201238	9.52363	6.77674	6.73543e-06	0.000253694	4.02727	CG10628
FBgn0034291	-1.09162	7.67825	-6.79367	6.54663e-06	0.000253694	4.05578	CG5770
FBgn0037000	-0.184454	8.30213	-6.78221	6.67384e-06	0.000253694	4.03648	CG5130
FBgn0037549	0.166205	10.3864	6.77746	6.72729e-06	0.000253694	4.02848	CG7878
FBgn0039431	0.475626	8.31154	6.78029	6.69545e-06	0.000253694	4.03324	CG6490
FBgn0040364	-0.625704	9.77365	-6.78926	6.59531e-06	0.000253694	4.04835	CG11378
FBgn0042179	-0.35644	7.53856	-6.78162	6.68045e-06	0.000253694	4.03549	CG18869
FBgn0259748	-1.16413	10.6791	-6.79191	6.56603e-06	0.000253694	4.05281	CG42397
FBgn0037435	0.316706	8.79423	6.7636	6.88597e-06	0.000258593	4.00509	CG18048
FBgn0031453	0.272532	12.0173	6.76003	6.92742e-06	0.000259377	3.99907	CG9894
FBgn0030396	-0.25717	9.78411	-6.75464	6.99054e-06	0.000260967	3.98997	CG2556
FBgn0036058	0.168755	10.7268	6.75139	7.02898e-06	0.000261627	3.98447	CG6707
FBgn0013953	0.50701	8.90429	6.74242	7.136e-06	0.00026175	3.96931	Esp
FBgn0020235	0.199098	12.3289	6.7476	7.07393e-06	0.00026175	3.97808	ATPsyn-gamma
FBgn0260486	0.252436	7.71485	6.74244	7.13573e-06	0.00026175	3.96935	CG42533
FBgn0038968	0.247338	10.5763	6.74403	7.11667e-06	0.00026175	3.97203	CG12499
FBgn0039627	0.256978	9.96262	6.74371	7.1205e-06	0.00026175	3.97149	CG11837
FBgn0034122	-0.274375	7.31297	-6.73732	7.1976e-06	0.000263244	3.96069	CG15711
FBgn0030659	0.287155	9.07219	6.73367	7.24195e-06	0.000264101	3.95453	CG9215
FBgn0030774	-0.81977	9.15736	-6.7187	7.42727e-06	0.000269587	3.92918	spheroide
FBgn0042092	0.290531	10.5861	6.71808	7.43512e-06	0.000269587	3.92812	CG13773
FBgn0010741	0.206651	12.0118	6.71146	7.51869e-06	0.000271836	3.9169	l(3)01239
FBgn0083124	0.33006	12.4208	6.70455	7.60694e-06	0.000274241	3.90519	Uhg4
FBgn0038046	0.26208	9.86673	6.70014	7.66397e-06	0.00027551	3.8977	CG5641
FBgn0036044	0.195312	7.06563	6.69136	7.77854e-06	0.000278834	3.88281	CG14168
FBgn0036024	-0.775528	12.6938	-6.68498	7.86311e-06	0.000281067	3.87196	CG18180
FBgn0039175	0.220786	10.4982	6.67957	7.93538e-06	0.000282849	3.86278	CG5706
FBgn0030789	0.31834	9.23481	6.67115	8.04945e-06	0.000285878	3.84846	Rrp45
FBgn0040717	-0.246821	7.70795	-6.66996	8.06566e-06	0.000285878	3.84644	Nplp4
FBgn0037249	0.222712	11.7318	6.65705	8.24427e-06	0.00029139	3.82446	eIF3-S10
FBgn0029629	0.16129	12.5351	6.64842	8.36595e-06	0.000293431	3.80975	CG8636
FBgn0035489	0.239555	10.2999	6.64902	8.35738e-06	0.000293431	3.81078	Rcd5
FBgn0035707	0.248	10.2204	6.64801	8.37178e-06	0.000293431	3.80905	CG8368
FBgn0040153	0.242161	8.10222	6.64254	8.44996e-06	0.000295351	3.79973	l(1)G0469
FBgn0031764	0.185703	8.43333	6.63117	8.6148e-06	0.00030028	3.78034	CG9107
FBgn0032050	0.214074	10.7048	6.62812	8.65952e-06	0.000301008	3.77514	CG13096
FBgn0038082	-1.68204	9.68983	-6.62488	8.70751e-06	0.000301844	3.76959	CG5724
FBgn0034807	-0.839952	8.7831	-6.61896	8.79566e-06	0.000304065	3.75948	CG9897
FBgn0039324	-0.891961	10.0515	-6.61422	8.86686e-06	0.000305688	3.75139	CG10553
FBgn0037659	0.236936	9.95864	6.60329	9.03356e-06	0.000310587	3.73269	CG11033
FBgn0002936	0.305591	7.84173	6.5986	9.10598e-06	0.000312226	3.72468	ninaA
FBgn0003189	0.344461	9.79015	6.59253	9.20071e-06	0.000314619	3.71429	r
FBgn0033699	0.155229	10.0763	6.58263	9.35759e-06	0.000319119	3.69732	RpS11
FBgn0036909	0.163432	11.0142	6.5802	9.39646e-06	0.000319581	3.69316	CG15881
FBgn0030720	0.311549	10.2251	6.57689	9.44964e-06	0.000320526	3.68749	CG8939
FBgn0000927	0.238145	11.5312	6.57449	9.48852e-06	0.000320982	3.68337	fs(1)Ya
FBgn0032512	0.245925	9.36212	6.57026	9.55737e-06	0.000322446	3.67611	CG9305
FBgn0034662	-0.73564	9.40998	-6.56319	9.67357e-06	0.00032457	3.66398	CG13492
FBgn0036362	1.05345	11.0466	6.56449	9.65205e-06	0.00032457	3.66621	CG10725
FBgn0040958	-1.22159	8.92302	-6.56174	9.69748e-06	0.00032457	3.6615	Peritrophin-15b
FBgn0037028	0.23835	9.12237	6.5588	9.74637e-06	0.000325343	3.65645	CG3618
FBgn0027525	0.412953	11.6506	6.55646	9.78546e-06	0.000325786	3.65243	CG7686
FBgn0024558	0.283687	11.8054	6.55315	9.84107e-06	0.000325918	3.64675	Dph5
FBgn0053653	0.211612	7.4448	6.55436	9.82071e-06	0.000325918	3.64882	Caps
FBgn0004901	0.214746	10.4479	6.55125	9.87318e-06	0.000326113	3.64347	Prat
FBgn0030593	-0.903935	9.63643	-6.54974	9.89867e-06	0.000326113	3.64089	CG9512
FBgn0031580	-0.660643	9.21296	-6.54346	1.00057e-05	0.000328782	3.63009	CG15423
FBgn0039678	-1.22936	7.6372	-6.54134	1.0042e-05	0.000329117	3.62645	Obp99a
FBgn0013269	0.193818	12.4311	6.53926	1.00779e-05	0.000329436	3.62287	FK506-bp1
FBgn0051262	0.259768	10.3474	6.53341	1.01795e-05	0.000331898	3.6128	CG31262
FBgn0051549	0.180553	11.2458	6.53032	1.02336e-05	0.000332802	3.60748	CG31549
FBgn0034968	0.231154	10.0906	6.52405	1.03442e-05	0.000335534	3.59669	RpL12
FBgn0262560	0.289703	9.94772	6.51969	1.04217e-05	0.000337183	3.58919	wcd
FBgn0032036	0.225705	10.2376	6.51768	1.04579e-05	0.000337487	3.58571	CG13384
FBgn0033507	0.272077	10.6016	6.51555	1.0496e-05	0.000337854	3.58205	CG12909
FBgn0032839	-1.05414	8.98736	-6.51237	1.05536e-05	0.000338843	3.57656	CG10659
FBgn0004228	-0.909506	9.49438	-6.50842	1.06254e-05	0.000340284	3.56975	mex1
FBgn0261610	0.2682	7.65401	6.50209	1.07415e-05	0.000340592	3.55884	CG42699
FBgn0033342	0.196098	12.4832	6.50376	1.07108e-05	0.000340592	3.56171	CG8258
FBgn0033760	-0.798698	9.19824	-6.50127	1.07567e-05	0.000340592	3.55742	CG8785
FBgn0034657	0.579947	8.45213	6.5022	1.07395e-05	0.000340592	3.55903	LBR
FBgn0036928	0.166206	12.0656	6.50055	1.077e-05	0.000340592	3.55618	Tom20
FBgn0032000	0.152865	10.3109	6.49533	1.08671e-05	0.000342644	3.54717	CG8372
FBgn0063497	-1.20538	10.4621	-6.49414	1.08892e-05	0.000342644	3.54512	GstE3
FBgn0030099	0.30252	8.57037	6.48953	1.09759e-05	0.000343401	3.53716	CG12056
FBgn0033222	-0.417821	8.62335	-6.49071	1.09536e-05	0.000343401	3.5392	CG12824
FBgn0039163	0.195992	10.8069	6.48799	1.10051e-05	0.000343401	3.53449	CG5515
FBgn0051119	0.311805	7.9728	6.48709	1.10222e-05	0.000343401	3.53294	HdacX
FBgn0038914	-0.817813	12.5849	-6.48266	1.11064e-05	0.000343483	3.52529	fit
FBgn0039756	-0.781684	9.78097	-6.48547	1.1053e-05	0.000343483	3.53014	CG9743
FBgn0043471	-0.616485	9.47355	-6.48329	1.10944e-05	0.000343483	3.52638	kappaTry
FBgn0035583	-0.749653	10.2571	-6.46885	1.13737e-05	0.000350887	3.50141	CG13704
FBgn0029737	0.299526	9.55033	6.46124	1.15239e-05	0.000354654	3.48824	CG6903
FBgn0027280	0.341896	10.2453	6.45643	1.16198e-05	0.00035613	3.47991	l(1)G0193
FBgn0030797	0.277503	9.34853	6.45463	1.1656e-05	0.00035613	3.47679	CG13004
FBgn0036096	0.174751	9.93101	6.4546	1.16565e-05	0.00035613	3.47675	CG8003
FBgn0037551	0.228635	10.3105	6.45282	1.16925e-05	0.000356366	3.47365	Gie
FBgn0032296	0.184636	8.38869	6.44953	1.1759e-05	0.000357531	3.46795	CG6729
FBgn0260795	0.227957	11.2747	6.44517	1.18478e-05	0.000359364	3.4604	CG42575
FBgn0034725	0.291038	7.79399	6.43299	1.20996e-05	0.000366123	3.43927	CG6044
FBgn0033773	0.179433	10.7614	6.42475	1.22731e-05	0.000370483	3.42498	mos
FBgn0038597	0.287579	9.68526	6.41837	1.24093e-05	0.000373453	3.41389	CG8064
FBgn0052344	0.28601	10.7124	6.41738	1.24307e-05	0.000373453	3.41217	CG32344
FBgn0031224	0.206469	10.0889	6.40504	1.26989e-05	0.000377912	3.39072	CG11454
FBgn0033787	-0.90389	10.1945	-6.40515	1.26965e-05	0.000377912	3.39091	CG13321
FBgn0035763	0.247183	11.203	6.40878	1.26169e-05	0.000377912	3.39722	CG8602
FBgn0038965	0.219876	10.1746	6.40569	1.26847e-05	0.000377912	3.39185	mats
FBgn0027334	0.314023	10.447	6.395	1.29217e-05	0.000383348	3.37325	l(1)G0004
FBgn0036735	0.223147	9.66079	6.3932	1.2962e-05	0.000383348	3.37013	Edc3
FBgn0037779	0.293157	10.6485	6.39273	1.29727e-05	0.000383348	3.36929	CG12811
FBgn0035024	0.1777	10.7222	6.38935	1.30487e-05	0.000384694	3.36342	CG11414
FBgn0000810	0.190144	9.8963	6.37679	1.33362e-05	0.000386843	3.34153	fs(1)K10
FBgn0010770	0.228202	10.2672	6.38376	1.31759e-05	0.000386843	3.35368	ppan
FBgn0011666	0.222584	8.57859	6.38102	1.32387e-05	0.000386843	3.34891	msi
FBgn0033195	0.236836	8.44005	6.38292	1.31952e-05	0.000386843	3.35221	CG1360
FBgn0033381	0.192208	10.288	6.37814	1.3305e-05	0.000386843	3.34389	CG11784
FBgn0033918	0.188785	10.5277	6.37889	1.32878e-05	0.000386843	3.34519	CG8531
FBgn0259704	0.255628	10.2323	6.37753	1.33191e-05	0.000386843	3.34282	CG42358
FBgn0038530	0.455841	6.79763	6.37393	1.34026e-05	0.000387875	3.33655	AttD
FBgn0260859	0.201181	9.60848	6.36852	1.35292e-05	0.000390643	3.32711	Bet3
FBgn0030777	-1.25819	9.65753	-6.36669	1.35723e-05	0.000390993	3.32391	CG9672
FBgn0033471	0.2954	9.43512	6.36163	1.3692e-05	0.000393543	3.31509	CG12134
FBgn0002873	0.262526	7.58971	6.34974	1.39778e-05	0.000394251	3.29433	mud
FBgn0029903	0.286076	9.65713	6.35454	1.38618e-05	0.000394251	3.30271	pod1
FBgn0032026	0.260043	11.6327	6.35202	1.39227e-05	0.000394251	3.2983	CG7627
FBgn0032346	0.263862	9.99018	6.3543	1.38675e-05	0.000394251	3.30229	Csl4
FBgn0034085	-0.391751	8.34637	-6.34892	1.39978e-05	0.000394251	3.29289	Ptp52F
FBgn0037439	0.397373	10.6257	6.35228	1.39163e-05	0.000394251	3.29877	CG10286
FBgn0037831	0.224351	8.34304	6.34983	1.39757e-05	0.000394251	3.29449	Cap-H2
FBgn0038473	0.277008	10.8261	6.35273	1.39055e-05	0.000394251	3.29955	ns1
FBgn0038951	0.208519	8.72337	6.35924	1.37491e-05	0.000394251	3.31091	CG5380
FBgn0033716	0.233371	9.76082	6.34138	1.41828e-05	0.000397685	3.27971	Den1
FBgn0050502	-0.638927	8.82555	-6.34198	1.41679e-05	0.000397685	3.28076	CG30502
FBgn0025117	0.264596	12.6131	6.33886	1.42451e-05	0.000398546	3.27531	und
FBgn0016762	0.28982	9.27821	6.33457	1.43517e-05	0.000398877	3.26781	angel
FBgn0033317	0.148578	10.9005	6.33679	1.42966e-05	0.000398877	3.27168	CG8635
FBgn0036945	-0.815954	10.5979	-6.33551	1.43284e-05	0.000398877	3.26944	CG6981
FBgn0026869	0.231497	7.9695	6.32696	1.45434e-05	0.000403186	3.25448	Thd1
FBgn0035043	-0.444487	8.56032	-6.32588	1.45707e-05	0.000403186	3.2526	CG4781
FBgn0033139	-0.641225	8.50136	-6.31801	1.4772e-05	0.000407862	3.23882	Tsp42Er
FBgn0034804	0.301108	10.752	6.31645	1.48122e-05	0.000408079	3.23608	CG3831
FBgn0032925	0.189445	10.8443	6.31105	1.49524e-05	0.000411044	3.22662	CG9246
FBgn0011204	0.235759	11.7084	6.30909	1.50036e-05	0.000411556	3.22318	cue
FBgn0023517	0.148776	11.289	6.30233	1.51816e-05	0.000414703	3.21133	Pgam5
FBgn0035770	-0.477072	12.3337	-6.30224	1.51841e-05	0.000414703	3.21117	pst
FBgn0029827	-0.634178	9.00355	-6.30085	1.5221e-05	0.000414813	3.20873	CG6048
FBgn0043470	-0.885491	10.7509	-6.29662	1.53337e-05	0.000416985	3.20132	lambdaTry
FBgn0062440	0.203545	11.0978	6.29242	1.54467e-05	0.000419153	3.19394	CG17680
FBgn0037818	-0.432157	7.96903	-6.28758	1.5578e-05	0.00042181	3.18544	CG6465
FBgn0003062	0.326256	11.7599	6.27452	1.59377e-05	0.00042766	3.1625	Fib
FBgn0022702	0.268606	9.48998	6.27481	1.59297e-05	0.00042766	3.16301	Cht2
FBgn0024361	-0.800813	9.6945	-6.27239	1.59973e-05	0.00042766	3.15875	Tsp2A
FBgn0027087	0.22472	10.3592	6.27682	1.58738e-05	0.00042766	3.16654	Aats-his
FBgn0032699	0.310963	9.23872	6.27656	1.58811e-05	0.00042766	3.16608	CG10383
FBgn0033183	0.188529	11.1827	6.27238	1.59974e-05	0.00042766	3.15874	CG1620
FBgn0038194	-0.653713	12.508	-6.26853	1.61055e-05	0.00042964	3.15197	Cyp6d5
FBgn0039044	0.18266	7.43436	6.26561	1.61881e-05	0.000430931	3.14684	p53
FBgn0025803	0.178256	10.0422	6.26291	1.62648e-05	0.000432062	3.14209	SNF4Agamma
FBgn0031020	0.184823	11.3887	6.26098	1.63199e-05	0.000432613	3.13869	Nat1
FBgn0029176	0.151013	13.7309	6.25742	1.6422e-05	0.0004335	3.13242	Ef1gamma
FBgn0037090	-0.717278	9.02533	-6.25801	1.64051e-05	0.0004335	3.13345	Est-Q
FBgn0002174	0.203758	10.0394	6.2531	1.65468e-05	0.000435029	3.12482	l(2)tid
FBgn0027053	0.158369	10.7111	6.25303	1.65489e-05	0.000435029	3.12469	CSN5
FBgn0035526	0.238283	9.28617	6.24532	1.6774e-05	0.000440029	3.11111	CG1316
FBgn0002578	-0.738971	10.0483	-6.23647	1.70365e-05	0.000444094	3.09551	m1
FBgn0003943	-0.20402	11.7101	-6.2348	1.70865e-05	0.000444094	3.09256	Ubi-p63E
FBgn0033635	0.223488	11.5384	6.23605	1.70492e-05	0.000444094	3.09476	CG7777
FBgn0035393	0.276356	10.05	6.23419	1.71049e-05	0.000444094	3.09148	CG16753
FBgn0037890	-0.272475	10.0106	-6.23741	1.70085e-05	0.000444094	3.09716	CG17734
FBgn0027575	0.194285	7.19053	6.22661	1.73341e-05	0.000449119	3.07811	GABA-B-R2
FBgn0015245	0.166336	12.9141	6.21249	1.77694e-05	0.000454653	3.05318	Hsp60
FBgn0023527	0.172632	10.8964	6.21152	1.77999e-05	0.000454653	3.05146	CG3071
FBgn0028381	-0.612073	8.95459	-6.21296	1.77548e-05	0.000454653	3.05401	decay
FBgn0035084	0.325887	8.1018	6.21561	1.76722e-05	0.000454653	3.05869	CG15861
FBgn0037894	0.205797	10.7064	6.21312	1.77496e-05	0.000454653	3.0543	Ranbp9
FBgn0038658	-0.793856	11.6566	-6.21758	1.76112e-05	0.000454653	3.06217	CG14292
FBgn0261530	0.246203	9.81334	6.21654	1.76432e-05	0.000454653	3.06034	nbs
FBgn0030793	0.218533	9.08183	6.20835	1.78994e-05	0.000456271	3.04586	CG9125
FBgn0028990	0.265545	9.39549	6.20566	1.79841e-05	0.000457506	3.04111	Spn27A
FBgn0039911	0.245025	7.35619	6.20232	1.80901e-05	0.000459276	3.03521	CG1909
FBgn0034572	0.220435	9.36494	6.17975	1.88235e-05	0.000476938	2.99526	CG9346
FBgn0039233	0.226907	10.7356	6.17616	1.8943e-05	0.000479003	2.98891	CG7006
FBgn0031910	-0.663193	8.10107	-6.17461	1.89951e-05	0.000479361	2.98614	CG15818
FBgn0013347	0.174085	11.2065	6.1715	1.90994e-05	0.000481032	2.98064	TfIIA-S
FBgn0002905	0.241128	8.56266	6.16175	1.94308e-05	0.000487432	2.96335	mus308
FBgn0034496	0.272532	9.29211	6.16248	1.94058e-05	0.000487432	2.96465	CG9143
FBgn0028473	0.390807	12.2649	6.15992	1.94936e-05	0.000487939	2.96011	CG8801
FBgn0031417	-0.720333	9.59625	-6.15891	1.95284e-05	0.000487939	2.95832	CG3597
FBgn0026566	0.245396	11.4535	6.15737	1.95817e-05	0.000488303	2.95558	CG1307
FBgn0037644	0.201319	9.91003	6.1561	1.96258e-05	0.000488438	2.95332	CG11964
FBgn0030711	0.183724	10.919	6.14751	1.99259e-05	0.00049392	2.93807	CG8928
FBgn0038893	0.213653	8.76744	6.14785	1.99136e-05	0.00049392	2.93868	CG6353
FBgn0039203	-0.432159	7.44528	-6.14644	1.99635e-05	0.00049392	2.93617	CG13618
FBgn0014427	0.187599	10.7568	6.14494	2.00165e-05	0.000494262	2.93351	CG11899
FBgn0031321	0.181345	8.56646	6.14255	2.01011e-05	0.000494416	2.92927	Tgt
FBgn0040795	-0.151524	7.1122	-6.14282	2.00917e-05	0.000494416	2.92973	CG13038
FBgn0029826	-0.478869	8.22223	-6.14099	2.01566e-05	0.000494816	2.9265	CG6041
FBgn0002772	0.725133	12.0527	6.13853	2.02446e-05	0.000496013	2.92211	Mlc1
FBgn0027512	0.144372	12.718	6.13258	2.04588e-05	0.000498341	2.91154	CG10254
FBgn0029976	0.250148	8.50252	6.13151	2.04976e-05	0.000498341	2.90963	snz
FBgn0030552	0.162443	10.2149	6.13287	2.04481e-05	0.000498341	2.91206	mRpL38
FBgn0036187	0.220801	9.42994	6.13329	2.04332e-05	0.000498341	2.9128	CG11660
FBgn0052758	0.177366	8.38294	6.12969	2.05636e-05	0.000498983	2.9064	CG32758
FBgn0030352	0.215983	9.75575	6.12419	2.07649e-05	0.0005029	2.89661	CG15738
FBgn0005664	-0.713521	7.56487	-6.11812	2.0989e-05	0.000506385	2.88582	Cry
FBgn0029892	0.205234	8.8668	6.1192	2.09489e-05	0.000506385	2.88774	CG3184
FBgn0038811	0.235983	9.32472	6.11134	2.12429e-05	0.000511532	2.87374	CG4159
FBgn0003515	-0.465197	7.95362	-6.10934	2.13183e-05	0.00051237	2.87017	st
FBgn0032733	-0.409109	7.50202	-6.10607	2.1442e-05	0.00051433	2.86436	CG15170
FBgn0038805	0.172737	10.6962	6.10504	2.14814e-05	0.00051433	2.86251	TFAM
FBgn0038292	-0.783661	9.21061	-6.0926	2.19604e-05	0.000524804	2.84035	CG3987
FBgn0030040	-0.686991	11.2059	-6.0905	2.20426e-05	0.000525081	2.83659	CG15347
FBgn0030869	0.158187	9.03045	6.09018	2.20552e-05	0.000525081	2.83602	Socs16D
FBgn0025641	0.16807	10.486	6.08885	2.21072e-05	0.000525328	2.83365	DAAM
FBgn0034258	0.245699	11.5937	6.0836	2.23143e-05	0.000529251	2.82428	eIF3-S8
FBgn0033174	0.374871	8.89565	6.0781	2.25333e-05	0.000533444	2.81446	CG11125
FBgn0262109	0.381722	8.27333	6.07553	2.26363e-05	0.000534877	2.80988	CR42862
FBgn0053229	0.381722	8.27333	6.07553	2.26363e-05	0.000534877	2.80988	CG33229
FBgn0038601	0.223257	10.6071	6.07442	2.26811e-05	0.000534936	2.80789	CG18600
FBgn0027556	-0.621365	9.47976	-6.06673	2.29936e-05	0.000541292	2.79413	CG4928
FBgn0030053	0.248762	9.00765	6.05322	2.35528e-05	0.000552723	2.76998	CG12081
FBgn0033375	0.251187	9.01075	6.05289	2.35667e-05	0.000552723	2.76938	CG8078
FBgn0002522	-0.198957	7.09878	-6.04979	2.3697e-05	0.000554747	2.76384	lab
FBgn0038191	0.248435	11.2143	6.04763	2.37882e-05	0.000555852	2.75998	CG9925
FBgn0053494	-0.619888	9.40919	-6.04565	2.38722e-05	0.000556783	2.75644	CG33494
FBgn0003015	0.165523	12.9072	6.0401	2.41094e-05	0.000561278	2.7465	osk
FBgn0030834	0.259687	10.2349	6.03845	2.41806e-05	0.000561899	2.74353	CG8675
FBgn0038989	0.205429	11.031	6.03595	2.42886e-05	0.000563371	2.73905	CG6937
FBgn0020303	0.302751	12.4658	6.02169	2.49144e-05	0.000575768	2.71348	fok
FBgn0025582	0.236694	12.2237	6.02243	2.48812e-05	0.000575768	2.71482	Int6
FBgn0015834	0.18666	12.8318	6.01727	2.51114e-05	0.00057715	2.70557	Trip1
FBgn0051232	0.139175	10.2009	6.01915	2.50275e-05	0.00057715	2.70893	koko
FBgn0051446	-0.903519	7.92101	-6.01802	2.50777e-05	0.00057715	2.70691	CG31446
FBgn0021875	0.42772	9.20178	6.01073	2.54062e-05	0.000582866	2.69383	Zfrp8
FBgn0250757	-0.429533	7.94634	-6.00714	2.55697e-05	0.000585552	2.68738	CG42235
FBgn0036975	-0.594231	9.88807	-6.00594	2.56246e-05	0.000585745	2.68523	CG5618
FBgn0261437	0.141816	11.1396	6.00256	2.57799e-05	0.000586817	2.67915	CSN8
FBgn0260439	0.141816	11.1396	6.00256	2.57799e-05	0.000586817	2.67915	Pp2A-29B
FBgn0010339	0.214523	11.5962	6.00157	2.58255e-05	0.000586817	2.67738	128up
FBgn0030365	0.218422	9.62803	6.00088	2.58575e-05	0.000586817	2.67613	Tango4
FBgn0038107	0.159912	10.1186	6.00173	2.58182e-05	0.000586817	2.67766	CG17327
FBgn0040786	0.17897	8.44758	5.99675	2.60493e-05	0.000590107	2.6687	CG14104
FBgn0040723	-0.481236	9.32874	-5.99405	2.6175e-05	0.000591892	2.66386	CG5011
FBgn0015838	0.183026	10.0913	5.98948	2.639e-05	0.000594726	2.65564	Vang
FBgn0030794	0.276353	9.55162	5.98938	2.63946e-05	0.000594726	2.65547	CG13005
FBgn0003278	0.409952	9.99251	5.98756	2.6481e-05	0.000595609	2.65218	RpI135
FBgn0032401	0.171662	8.17848	5.98331	2.6683e-05	0.000599085	2.64454	CG6792
FBgn0028504	0.24058	7.58968	5.97683	2.69943e-05	0.000604998	2.63288	CG12182
FBgn0002021	0.192778	9.74198	5.96905	2.73728e-05	0.000611346	2.61888	l(2)37Bb
FBgn0036462	0.196605	10.5514	5.96902	2.73744e-05	0.000611346	2.61882	mRpL39
FBgn0261479	0.189996	10.992	5.954	2.81214e-05	0.000626283	2.59175	nero
FBgn0025630	0.194792	8.93782	5.9526	2.81921e-05	0.000626283	2.58923	CG4061
FBgn0027084	0.188843	10.927	5.95351	2.81464e-05	0.000626283	2.59086	Aats-lys
FBgn0003392	0.139092	9.18506	5.93882	2.88985e-05	0.000639721	2.56435	shi
FBgn0037819	-0.364825	10.6665	-5.93926	2.88756e-05	0.000639721	2.56515	CG14688
FBgn0028744	0.233078	10.8634	5.93128	2.92923e-05	0.000647303	2.55074	CG5033
FBgn0033160	0.252084	10.3943	5.92504	2.96229e-05	0.000653464	2.53946	CG11107
FBgn0031161	0.305654	10.0356	5.92071	2.9854e-05	0.000656269	2.53165	CG15445
FBgn0042201	0.899022	9.70483	5.92078	2.98504e-05	0.000656269	2.53177	Nplp3
FBgn0036514	0.234621	9.97919	5.91669	3.00709e-05	0.000659886	2.52437	CG12301
FBgn0030345	0.234602	10.1145	5.91309	3.02662e-05	0.000663019	2.51786	CG1847
FBgn0005391	-0.170926	14.3498	-5.90632	3.06375e-05	0.000668831	2.5056	Yp2
FBgn0037943	0.176338	9.74713	5.9067	3.06162e-05	0.000668831	2.5063	CG14722
FBgn0031003	0.146993	9.51585	5.90069	3.09498e-05	0.000674481	2.49541	CG7889
FBgn0029813	0.221251	8.29046	5.89859	3.10667e-05	0.000675862	2.49161	CG15766
FBgn0250906	0.167432	11.9709	5.89547	3.12417e-05	0.000678498	2.48597	Pgk
FBgn0052137	-0.337393	8.93982	-5.89324	3.13677e-05	0.000680066	2.48192	CG32137
FBgn0051211	0.168009	8.47187	5.89156	3.14629e-05	0.000680959	2.47887	CG31211
FBgn0052177	0.154861	10.0797	5.88757	3.16897e-05	0.000684693	2.47165	CG32177
FBgn0002985	-0.342315	7.71531	-5.8836	3.19179e-05	0.000687269	2.46444	odd
FBgn0035371	0.184441	9.12306	5.88391	3.18999e-05	0.000687269	2.46501	CG9977
FBgn0035181	0.198955	9.9845	5.87839	3.22189e-05	0.000692569	2.455	CG9205
FBgn0001137	0.289891	9.53943	5.87393	3.24793e-05	0.00069281	2.44691	grk
FBgn0028950	-0.829998	10.6215	-5.87602	3.23572e-05	0.00069281	2.45069	CG15255
FBgn0034214	0.371479	9.67328	5.8735	3.25046e-05	0.00069281	2.44613	CG6550
FBgn0034883	-0.463849	8.89416	-5.87717	3.22897e-05	0.00069281	2.45279	CG17664
FBgn0035825	0.160433	9.28846	5.8744	3.24517e-05	0.00069281	2.44776	CG8111
FBgn0040394	0.188931	9.87839	5.87216	3.25836e-05	0.000693321	2.44369	CG16903
FBgn0015019	0.16978	11.9455	5.86848	3.28005e-05	0.000693996	2.43702	Cctgamma
FBgn0027497	0.145911	8.95053	5.86789	3.28353e-05	0.000693996	2.43595	Madm
FBgn0036186	0.246845	6.98172	5.86939	3.27464e-05	0.000693996	2.43867	CG6071
FBgn0036767	-1.39576	9.20372	-5.86899	3.27701e-05	0.000693996	2.43795	CG16775
FBgn0026189	0.206298	8.58488	5.86575	3.29627e-05	0.000695523	2.43206	prominin-like
FBgn0261381	0.148262	11.0488	5.86387	3.30748e-05	0.000696725	2.42864	mtTFB1
FBgn0261353	0.148262	11.0488	5.86387	3.30748e-05	0.000696725	2.42864	CG42630
FBgn0036826	0.211016	10.4646	5.861	3.32464e-05	0.000699172	2.42344	CG3893
FBgn0025726	0.268498	9.39417	5.85774	3.34432e-05	0.000702139	2.41751	unc-13
FBgn0021995	0.274686	9.97418	5.85421	3.36571e-05	0.000703253	2.41109	Rs1
FBgn0032233	0.2285	7.1507	5.85445	3.36425e-05	0.000703253	2.41153	dpr19
FBgn0039471	-0.884336	11.3134	-5.8541	3.36634e-05	0.000703253	2.41091	CG6295
FBgn0038964	0.162208	12.2995	5.84584	3.41704e-05	0.000712664	2.39588	Nop56
FBgn0032248	0.182446	9.92143	5.8432	3.43338e-05	0.000714892	2.39108	CG5343
FBgn0028518	-0.493937	8.49498	-5.84129	3.44529e-05	0.00071501	2.3876	CG18480
FBgn0031011	0.162412	8.38493	5.84138	3.44471e-05	0.00071501	2.38777	CG8034
FBgn0035195	0.185323	10.6801	5.83559	3.48097e-05	0.000721229	2.37724	Sac1
FBgn0033087	0.262991	8.19465	5.83043	3.51367e-05	0.000723254	2.36784	CG3194
FBgn0034497	0.704426	10.5545	5.83047	3.51341e-05	0.000723254	2.36791	CG9090
FBgn0035675	-0.329713	9.27843	-5.83201	3.50358e-05	0.000723254	2.37073	CG6610
FBgn0038704	0.154421	7.91908	5.8318	3.50494e-05	0.000723254	2.37034	CG5316
FBgn0040730	-0.235756	8.04693	-5.8286	3.52532e-05	0.00072447	2.36451	CG15127
FBgn0050147	0.241059	7.55165	5.82667	3.53764e-05	0.000725821	2.361	Hil
FBgn0030412	0.165582	10.0485	5.82222	3.56626e-05	0.000730504	2.3529	tomosyn
FBgn0035356	-0.786777	10.2458	-5.82064	3.57652e-05	0.000731418	2.35002	CG16986
FBgn0042083	0.158317	9.93286	5.81899	3.58724e-05	0.000732424	2.34701	CG3267
FBgn0035762	0.17642	9.26151	5.80708	3.66555e-05	0.000747203	2.32529	CG8605
FBgn0040687	-0.293241	13.6348	-5.80472	3.68122e-05	0.000749187	2.321	CG14645
FBgn0039326	-1.2227	9.5552	-5.79857	3.72257e-05	0.000756383	2.30977	CG10562
FBgn0036888	0.217019	10.9817	5.79583	3.74112e-05	0.000758931	2.30478	CG9330
FBgn0038037	-0.586599	10.6865	-5.79164	3.7697e-05	0.000763194	2.29712	Cyp9f2
FBgn0038275	0.271703	9.73206	5.79098	3.77423e-05	0.000763194	2.29592	CG3817
FBgn0034029	0.190425	9.42418	5.78949	3.78442e-05	0.00076403	2.2932	eIF2B-gamma
FBgn0033261	0.200031	9.92428	5.78781	3.79599e-05	0.00076514	2.29014	CG18316
FBgn0034718	-0.619858	10.2868	-5.78368	3.82463e-05	0.0007694	2.28258	wdp
FBgn0038110	-0.247724	9.60759	-5.78213	3.83541e-05	0.0007694	2.27975	CG8031
FBgn0050016	-0.677697	8.45925	-5.78216	3.83517e-05	0.0007694	2.27981	CG30016
FBgn0034736	-0.442397	8.19811	-5.77781	3.86559e-05	0.000774222	2.27187	CG6018
FBgn0039141	0.188831	9.95448	5.77672	3.87329e-05	0.000774535	2.26987	spas
FBgn0033092	0.230086	10.0184	5.77238	3.904e-05	0.000778209	2.26193	CG9422
FBgn0039335	0.223129	8.76165	5.77276	3.9013e-05	0.000778209	2.26262	Vps33B
FBgn0004956	0.169485	7.03142	5.76921	3.92652e-05	0.000780234	2.25614	os
FBgn0016684	-0.342281	7.20064	-5.76989	3.92168e-05	0.000780234	2.25739	NaPi-T
FBgn0002723	0.141303	7.88542	5.76229	3.97632e-05	0.000788886	2.24347	Met
FBgn0030999	-0.839996	10.5995	-5.75623	4.02041e-05	0.000796382	2.23239	Mur18B
FBgn0010292	0.197274	10.8547	5.74321	4.1169e-05	0.000809143	2.20854	bys
FBgn0024958	0.177144	9.1307	5.74442	4.10785e-05	0.000809143	2.21075	Irp-1A
FBgn0024992	0.172068	10.2753	5.74443	4.10776e-05	0.000809143	2.21078	CG2658
FBgn0038057	0.274196	9.20902	5.74329	4.11631e-05	0.000809143	2.20868	CG12267
FBgn0052075	0.175313	10.0716	5.74435	4.10839e-05	0.000809143	2.21062	CG32075
FBgn0051550	0.179118	9.74869	5.74219	4.12458e-05	0.000809392	2.20667	CG31550
FBgn0028491	-0.40289	9.37755	-5.73841	4.15311e-05	0.000813727	2.19973	CG2930
FBgn0010223	-0.499476	8.04867	-5.73638	4.16853e-05	0.000815481	2.19601	Galpha73B
FBgn0039691	0.187101	9.6569	5.73441	4.18348e-05	0.000817138	2.19241	CG1972
FBgn0031942	0.660894	9.40213	5.7333	4.19197e-05	0.000817531	2.19037	CG7203
FBgn0261811	0.250127	8.18045	5.72991	4.21795e-05	0.000821328	2.18416	pico
FBgn0039936	0.203524	12.1838	5.72469	4.25837e-05	0.000827922	2.17457	CG11148
FBgn0029992	0.232698	8.23261	5.72038	4.29197e-05	0.00083317	2.16667	Upf2
FBgn0014010	0.182286	11.0645	5.71862	4.3058e-05	0.000833432	2.16343	Rab5
FBgn0027101	0.230654	8.64274	5.71853	4.30653e-05	0.000833432	2.16326	Dyrk3
FBgn0034573	0.187835	9.75446	5.71539	4.33124e-05	0.000836932	2.15751	CG3295
FBgn0027786	0.137936	11.4305	5.70757	4.39356e-05	0.000847675	2.14315	Mtch
FBgn0030007	0.207791	9.90206	5.70174	4.44065e-05	0.000854629	2.13243	CG2263
FBgn0085317	-0.395034	8.0424	-5.70143	4.44315e-05	0.000854629	2.13186	CG34288
FBgn0030679	0.292677	10.8087	5.69614	4.4864e-05	0.000861095	2.12212	CG8206
FBgn0034523	0.275003	8.47203	5.69565	4.49041e-05	0.000861095	2.12123	Nnf1a
FBgn0028978	0.195459	9.29396	5.69002	4.53688e-05	0.000868685	2.11088	trbl
FBgn0039092	-0.397923	6.91387	-5.68415	4.58593e-05	0.000876746	2.10006	CG16723
FBgn0032889	-0.512119	11.2778	-5.68192	4.60466e-05	0.000878995	2.09597	CG9331
FBgn0039508	0.184822	9.79102	5.67681	4.64796e-05	0.00088592	2.08656	CG3368
FBgn0013988	0.664495	8.85207	5.67095	4.69814e-05	0.000888772	2.07576	Strn-Mlck
FBgn0036035	0.209917	10.4703	5.67173	4.69144e-05	0.000888772	2.07719	CG18178
FBgn0037876	0.225611	8.10885	5.6737	4.67452e-05	0.000888772	2.08083	CG4820
FBgn0037877	0.207114	8.87638	5.67105	4.69726e-05	0.000888772	2.07595	CG6689
FBgn0051087	-0.763622	9.11092	-5.67176	4.69117e-05	0.000888772	2.07725	CG31087
FBgn0004882	0.193517	11.9778	5.66444	4.75452e-05	0.000897336	2.06376	orb
FBgn0037762	-0.708198	10.5643	-5.66408	4.75763e-05	0.000897336	2.06311	eloF
FBgn0035639	0.175753	10.6903	5.66312	4.76604e-05	0.000897581	2.06133	CG5537
FBgn0000447	0.222295	10.6508	5.66054	4.78862e-05	0.000899149	2.05658	Dhod
FBgn0038233	0.221622	8.58188	5.66118	4.78301e-05	0.000899149	2.05776	HtrA2
FBgn0033010	-0.232126	9.69145	-5.65804	4.81067e-05	0.000901605	2.05196	Atf6
FBgn0037653	0.188053	10.2548	5.65662	4.82314e-05	0.000901605	2.04936	CG11982
FBgn0038916	-0.465118	8.04862	-5.65668	4.82262e-05	0.000901605	2.04947	dnd
FBgn0032154	0.215134	9.49238	5.65465	4.84063e-05	0.000903537	2.04572	CG5924
FBgn0052791	0.207041	7.604	5.65346	4.85124e-05	0.00090418	2.04352	CG32791
FBgn0015279	0.128805	10.5402	5.64917	4.8896e-05	0.00090916	2.0356	Pi3K92E
FBgn0015905	0.180059	9.4579	5.64886	4.89237e-05	0.00090916	2.03503	ast
FBgn0022709	0.394054	9.08456	5.64734	4.906e-05	0.000910351	2.03223	Adk1
FBgn0037065	-0.699253	9.22016	-5.64444	4.93222e-05	0.000913873	2.02687	CG12974
FBgn0029525	0.23792	10.0462	5.64181	4.95606e-05	0.000916943	2.02203	CG18273
FBgn0037942	0.201486	9.43587	5.63799	4.991e-05	0.000922055	2.01496	CG14721
FBgn0022959	0.161174	11.8768	5.63434	5.02452e-05	0.000926798	2.00823	yps
FBgn0036643	0.195294	8.96033	5.6336	5.03136e-05	0.000926798	2.00687	Syx8
FBgn0033093	-0.749423	8.69117	-5.632	5.0462e-05	0.000928177	2.0039	CG3270
FBgn0028836	0.147675	10.171	5.62895	5.07459e-05	0.00093204	1.99826	CSN7
FBgn0001224	-0.361688	7.95612	-5.62747	5.08843e-05	0.000933224	1.99553	Hsp23
FBgn0033402	-0.19531	9.14675	-5.62264	5.13376e-05	0.000940171	1.98661	Myd88
FBgn0020910	0.251276	10.0833	5.61827	5.17522e-05	0.00094502	1.97852	RpL3
FBgn0034065	0.304597	9.55096	5.61889	5.16928e-05	0.00094502	1.97968	Rrp42
FBgn0004556	0.221404	9.58523	5.61731	5.18432e-05	0.000945314	1.97676	Dbp73D
FBgn0035641	-0.529385	8.98529	-5.61437	5.21252e-05	0.000949085	1.9713	CG5568
FBgn0004649	0.158948	11.8971	5.61268	5.22869e-05	0.000949289	1.96819	yl
FBgn0053510	-0.517253	7.29476	-5.61344	5.22142e-05	0.000949289	1.96959	CG33510
FBgn0039818	-0.325151	7.10302	-5.6081	5.27294e-05	0.000955947	1.95972	CG11318
FBgn0038337	-0.705351	8.91165	-5.60458	5.3073e-05	0.000960796	1.95319	CG6125
FBgn0037135	0.300295	12.2564	5.60353	5.3175e-05	0.000961264	1.95126	CG7414
FBgn0030142	0.186999	10.4457	5.60051	5.34714e-05	0.00096524	1.94567	CG3004
FBgn0022985	0.200487	10.9771	5.59727	5.37923e-05	0.000969644	1.93965	qkr58E-2
FBgn0037315	0.17687	9.95419	5.59588	5.39303e-05	0.000970745	1.93708	Cerk
FBgn0052207	0.28628	9.45008	5.59339	5.41776e-05	0.000973808	1.93248	CR32207
FBgn0031865	-0.408295	9.13113	-5.5885	5.46684e-05	0.000981232	1.92341	Nha1
FBgn0033434	-0.292996	10.2612	-5.58377	5.51474e-05	0.00098702	1.91464	CG1902
FBgn0040813	-0.229267	13.9281	-5.58404	5.51203e-05	0.00098702	1.91513	Nplp2
FBgn0036889	0.203423	9.28391	5.57625	5.59176e-05	0.000999389	1.9007	CG14100
FBgn0032645	0.253201	7.33108	5.57538	5.60079e-05	0.000999586	1.89907	CG15142
FBgn0034720	0.345249	8.66762	5.57403	5.6147e-05	0.00100048	1.89658	CG11206
FBgn0036780	-0.168435	7.85012	-5.5726	5.62957e-05	0.00100048	1.89392	CG7330
FBgn0041203	0.304897	9.52136	5.57263	5.62929e-05	0.00100048	1.89397	LIMK1
FBgn0022984	0.136121	10.4097	5.56837	5.6737e-05	0.0010069	1.88607	qkr58E-3
FBgn0029873	0.222825	10.4387	5.56727	5.68521e-05	0.00100753	1.88403	CG3918
FBgn0086361	0.147611	9.76549	5.56645	5.69387e-05	0.00100765	1.8825	alph
FBgn0038346	-0.630469	9.41401	-5.56425	5.717e-05	0.00100921	1.87843	CG14872
FBgn0039249	0.217358	8.6357	5.56409	5.7187e-05	0.00100921	1.87813	CG11168
FBgn0002914	0.167963	10.1933	5.56295	5.73072e-05	0.00100992	1.87602	Myb
FBgn0004856	0.193393	10.3284	5.56102	5.75125e-05	0.00101212	1.87242	Bx42
FBgn0038717	-0.881488	8.29756	-5.56	5.76207e-05	0.00101261	1.87053	CG17751
FBgn0004650	0.188893	11.2481	5.55573	5.80771e-05	0.0010178	1.8626	fs(1)N
FBgn0030719	0.186009	11.4334	5.55596	5.80528e-05	0.0010178	1.86302	eIF5
FBgn0052473	0.188656	11.4056	5.55157	5.85255e-05	0.00102424	1.85487	CG32473
FBgn0052533	0.241801	7.78451	5.54641	5.90863e-05	0.00103262	1.84528	CG32533
FBgn0039215	0.20979	9.38954	5.54566	5.91685e-05	0.00103263	1.84389	CG6695
FBgn0027054	0.149064	11.005	5.54172	5.96009e-05	0.00103874	1.83656	CSN4
FBgn0012058	0.191051	9.23627	5.53843	5.99657e-05	0.00104365	1.83043	Cdc27
FBgn0032187	-0.284498	7.79978	-5.53661	6.01674e-05	0.00104572	1.82706	CG4839
FBgn0037633	0.254558	9.25007	5.53517	6.03284e-05	0.00104707	1.82437	CG9839
FBgn0000667	0.178128	10.2564	5.533	6.05708e-05	0.00104984	1.82034	Actn
FBgn0020909	0.14426	10.3997	5.5288	6.10438e-05	0.00105325	1.81252	Rtc1
FBgn0035679	-0.580056	9.87774	-5.53027	6.08777e-05	0.00105325	1.81526	CG10467
FBgn0039757	0.110511	14.0024	5.52756	6.11835e-05	0.00105325	1.81022	RpS7
FBgn0042186	-0.645947	9.38276	-5.52755	6.11848e-05	0.00105325	1.8102	CG17239
FBgn0037926	0.303821	9.45722	5.52624	6.13341e-05	0.00105438	1.80775	Elp1
FBgn0010114	0.301023	7.48889	5.52332	6.1666e-05	0.00105864	1.80232	hig
FBgn0031050	0.125058	9.06409	5.51766	6.23167e-05	0.00106836	1.79177	Arp11
FBgn0033051	-0.230126	8.792	-5.51095	6.30964e-05	0.00107883	1.77927	dream
FBgn0033502	-0.279366	8.24646	-5.51093	6.30983e-05	0.00107883	1.77924	CG12910
FBgn0052418	0.179609	9.37358	5.50873	6.33565e-05	0.00108178	1.77514	CG32418
FBgn0016131	0.264686	9.72404	5.50514	6.378e-05	0.00108607	1.76844	Cdk4
FBgn0027581	0.196854	9.78598	5.5052	6.37726e-05	0.00108607	1.76856	CG6191
FBgn0033153	0.220258	7.78418	5.5043	6.38792e-05	0.00108629	1.76688	Gadd45
FBgn0030061	0.221111	10.4735	5.50156	6.42049e-05	0.00108889	1.76177	CG1785
FBgn0031022	0.291625	8.67722	5.50171	6.41873e-05	0.00108889	1.76204	CG12204
FBgn0046322	-0.342716	7.59236	-5.49979	6.44163e-05	0.00109101	1.75846	p38c
FBgn0032781	0.154348	9.96468	5.49817	6.46103e-05	0.00109283	1.75544	CG9987
FBgn0025621	0.243608	9.26474	5.49625	6.48407e-05	0.00109526	1.75186	CG16989
FBgn0034970	0.154105	10.3774	5.49501	6.49898e-05	0.00109567	1.74955	yki
FBgn0040336	-0.213414	9.43895	-5.49461	6.50384e-05	0.00109567	1.7488	CG9904
FBgn0030503	-0.247249	9.17128	-5.49259	6.52827e-05	0.00109685	1.74503	Tango2
FBgn0085358	-0.271496	7.82225	-5.49291	6.52432e-05	0.00109685	1.74564	CG34329
FBgn0032435	-0.509024	8.30702	-5.49083	6.54954e-05	0.00109896	1.74176	Oatp33Eb
FBgn0003676	0.172024	12.4094	5.48834	6.57994e-05	0.0011026	1.73711	T-cp1
FBgn0030330	0.171618	10.2688	5.47946	6.68939e-05	0.00111945	1.72052	Tango10
FBgn0001624	0.154377	8.19627	5.47806	6.70686e-05	0.00112089	1.7179	dlg1
FBgn0038256	0.207242	11.6002	5.47373	6.76104e-05	0.00112845	1.70981	CG7530
FBgn0014380	-0.489517	9.63786	-5.46879	6.82337e-05	0.00113435	1.70059	RhoL
FBgn0034073	0.211154	9.81213	5.46923	6.81783e-05	0.00113435	1.70141	CG8414
FBgn0038306	0.167422	9.97171	5.47012	6.80658e-05	0.00113435	1.70307	Art3
FBgn0031023	0.304607	8.20515	5.46601	6.8587e-05	0.00113872	1.6954	CG14200
FBgn0036691	0.133031	9.30046	5.4639	6.88569e-05	0.0011417	1.69145	beg
FBgn0037581	0.267766	7.91116	5.45771	6.96554e-05	0.00115343	1.67986	CG7352
FBgn0010808	0.215493	10.8102	5.45301	7.02664e-05	0.00116202	1.67108	l(3)03670
FBgn0030364	0.202398	11.0832	5.4504	7.06092e-05	0.00116616	1.66619	CG15735
FBgn0052053	-0.203877	7.1682	-5.44667	7.11019e-05	0.00117276	1.6592	CG32053
FBgn0033817	0.315709	7.42452	5.44536	7.12747e-05	0.00117408	1.65676	CG4688
FBgn0015277	0.172818	8.65478	5.44403	7.14524e-05	0.00117547	1.65426	Pi3K59F
FBgn0039323	-0.434796	7.7369	-5.44235	7.16761e-05	0.00117755	1.65112	CG10559
FBgn0052054	-0.589137	8.02156	-5.44168	7.17653e-05	0.00117755	1.64987	CG32054
FBgn0261618	0.200096	10.0268	5.44051	7.19224e-05	0.00117859	1.64767	larp
FBgn0005630	0.132208	8.77666	5.43474	7.27003e-05	0.0011898	1.63686	lola
FBgn0004103	0.136069	11.7723	5.43307	7.29266e-05	0.00119195	1.63373	Pp1-87B
FBgn0034031	-0.581588	9.29432	-5.43069	7.32508e-05	0.0011957	1.62928	CG12963
FBgn0001120	0.24474	12.3945	5.42932	7.34379e-05	0.00119721	1.62671	gnu
FBgn0250791	0.224672	8.85742	5.42259	7.43654e-05	0.00121076	1.6141	Snap
FBgn0040235	0.153258	9.79025	5.41956	7.47878e-05	0.00121607	1.6084	c12.1
FBgn0038416	-0.35254	7.58556	-5.41454	7.54919e-05	0.00122594	1.59899	CG17930
FBgn0025837	-0.33995	7.53029	-5.41363	7.56196e-05	0.00122644	1.59729	CG17636
FBgn0036579	0.127564	9.89113	5.40807	7.64089e-05	0.00123765	1.58685	CG5027
FBgn0051104	-1.30256	9.88649	-5.4043	7.69491e-05	0.0012448	1.57977	CG31104
FBgn0029715	0.15134	11.1763	5.40203	7.72758e-05	0.00124848	1.57551	CG11444
FBgn0000053	0.330321	9.92074	5.39116	7.88623e-05	0.00127249	1.55509	ade3
FBgn0011824	0.196707	11.6689	5.3903	7.89888e-05	0.0012729	1.55348	CG4038
FBgn0021874	0.340589	9.45916	5.38815	7.93078e-05	0.00127641	1.54943	Nle
FBgn0022023	0.227201	12.262	5.38088	8.03924e-05	0.00129057	1.53577	eIF-3p40
FBgn0039050	-0.295697	7.40678	-5.38127	8.03347e-05	0.00129057	1.5365	CG17110
FBgn0024191	0.172779	8.28906	5.37989	8.05429e-05	0.00129135	1.5339	sip1
FBgn0033182	0.237977	8.56265	5.37751	8.0901e-05	0.00129544	1.52944	CG1621
FBgn0031657	0.224937	10.1652	5.37473	8.13244e-05	0.00130057	1.52419	CG3756
FBgn0037279	-0.179634	9.72166	-5.37231	8.16929e-05	0.00130481	1.51965	CG1129
FBgn0035667	-0.970749	10.581	-5.36271	8.31756e-05	0.00132514	1.50157	Jon65Ai
FBgn0035059	0.203922	9.33112	5.35689	8.40874e-05	0.00133461	1.49061	CG3894
FBgn0036018	0.176771	9.22406	5.3569	8.40863e-05	0.00133461	1.49063	CG3335
FBgn0038681	-0.635961	9.38419	-5.35743	8.40028e-05	0.00133461	1.49163	Cyp12a4
FBgn0033232	0.1527	9.07331	5.35562	8.42883e-05	0.00133612	1.48822	CG12159
FBgn0031412	0.382033	7.25185	5.35265	8.47583e-05	0.00134183	1.48263	CG16995
FBgn0038582	0.283569	8.33732	5.352	8.48615e-05	0.00134183	1.48141	CG7988
FBgn0053120	-0.450011	8.9995	-5.34773	8.55441e-05	0.00135093	1.47335	CG33120
FBgn0035904	-0.517403	10.7713	-5.34314	8.6284e-05	0.00136091	1.4647	CG6776
FBgn0000117	0.17008	11.9523	5.34133	8.65775e-05	0.00136384	1.46129	arm
FBgn0040066	0.269517	10.1093	5.34025	8.67535e-05	0.00136491	1.45925	wds
FBgn0036369	0.193185	7.38997	5.3369	8.73e-05	0.0013718	1.45294	CG10089
FBgn0015269	0.162318	7.95595	5.33487	8.76335e-05	0.00137532	1.44911	Nf1
FBgn0033661	0.207596	10.5585	5.33059	8.8341e-05	0.0013847	1.44102	CG13185
FBgn0010408	0.207183	12.6574	5.32989	8.84561e-05	0.00138479	1.43972	RpS9
FBgn0030504	0.279941	11.5438	5.32309	8.95938e-05	0.00140018	1.42687	CG2691
FBgn0030855	0.220498	9.69526	5.32269	8.96614e-05	0.00140018	1.42612	CG5800
FBgn0010269	0.230651	10.0822	5.32126	8.99018e-05	0.0014022	1.42343	Dsor1
FBgn0033315	0.256046	8.87072	5.31626	9.07505e-05	0.00141369	1.41398	beta3GalTII
FBgn0030990	0.150635	10.2121	5.31253	9.13903e-05	0.00142015	1.40692	CG7556
FBgn0063495	-0.372109	7.77413	-5.31288	9.133e-05	0.00142015	1.40759	GstE5
FBgn0015247	0.151323	10.4061	5.30934	9.19398e-05	0.00142693	1.4009	Iap2
FBgn0259178	0.20792	8.44056	5.30814	9.21468e-05	0.00142839	1.39864	5PtaseI
FBgn0038535	-0.286012	10.2191	-5.3072	9.23094e-05	0.00142915	1.39687	alt
FBgn0035162	0.279635	11.2444	5.3024	9.3147e-05	0.00143859	1.38779	CG13900
FBgn0038589	0.27816	7.46151	5.30299	9.30441e-05	0.00143859	1.3889	CG18598
FBgn0031813	-0.752831	10.7183	-5.30124	9.33518e-05	0.00143999	1.38559	CG9527
FBgn0034564	0.137653	11.0022	5.29832	9.38651e-05	0.00144582	1.38008	CG9344
FBgn0051706	0.271704	7.64574	5.29779	9.39589e-05	0.00144582	1.37907	CG31706
FBgn0039462	0.190942	7.56551	5.295	9.44542e-05	0.00144814	1.37379	CG14252
FBgn0052633	-0.552959	8.30998	-5.29597	9.42816e-05	0.00144814	1.37563	CG32633
FBgn0250836	-0.783123	10.5853	-5.29501	9.44525e-05	0.00144814	1.37381	CG8628
FBgn0013954	0.158005	13.2838	5.29306	9.47989e-05	0.00145167	1.37013	FK506-bp2
FBgn0035743	-0.910792	9.34606	-5.28909	9.55102e-05	0.00146078	1.36262	CG15829
FBgn0038639	0.168517	8.35192	5.28654	9.5971e-05	0.00146606	1.35778	CG7705
FBgn0034394	-0.633183	11.6001	-5.28489	9.62687e-05	0.00146883	1.35467	CG15096
FBgn0038271	0.279853	12.4385	5.2832	9.65756e-05	0.00147173	1.35147	CG3731
FBgn0029755	0.261429	10.4184	5.27851	9.74337e-05	0.00148301	1.34259	Sas10
FBgn0015828	0.221049	10.5919	5.27724	9.76672e-05	0.00148474	1.34018	TfIIEalpha
FBgn0033584	0.185402	10.4389	5.27661	9.77827e-05	0.00148474	1.33899	CG7737
FBgn0004028	0.497521	12.12	5.27241	9.85596e-05	0.00149295	1.33104	wupA
FBgn0051004	-0.795265	9.81856	-5.27273	9.85e-05	0.00149295	1.33165	CG31004
FBgn0034399	0.249996	11.1409	5.27024	9.89649e-05	0.00149729	1.32692	CG15083
FBgn0032955	0.16459	11.629	5.26752	9.94737e-05	0.00150319	1.32177	CG2201
FBgn0030899	0.578231	8.23381	5.26435	0.00010007	0.00151038	1.31577	Her
FBgn0033958	0.190563	7.27907	5.26277	0.000100369	0.00151309	1.31276	CG12858
FBgn0034733	-0.290247	9.53584	-5.26083	0.000100737	0.00151682	1.30909	CG4752
FBgn0014026	0.138645	13.8062	5.25913	0.000101061	0.00151882	1.30586	RpL7A
FBgn0030151	0.149358	11.6743	5.25887	0.00010111	0.00151882	1.30537	CG1354
FBgn0027106	-0.453609	9.29553	-5.25341	0.000102157	0.0015309	1.29503	inx7
FBgn0031739	0.23567	10.0611	5.25399	0.000102046	0.0015309	1.29612	CG14005
FBgn0000592	-0.69456	10.3538	-5.25074	0.000102674	0.00153682	1.28996	Est-6
FBgn0034603	0.341459	8.31452	5.2479	0.000103226	0.00154153	1.28457	Glycogenin
FBgn0035590	0.196161	9.16855	5.24786	0.000103233	0.00154153	1.2845	CG10673
FBgn0259937	0.15928	12.4042	5.24526	0.000103741	0.00154728	1.27957	Nop60B
FBgn0261872	0.164895	8.3189	5.24323	0.000104139	0.00154956	1.27572	scaf6
FBgn0085265	-0.564524	8.01742	-5.2437	0.000104047	0.00154956	1.27661	CG34236
FBgn0034876	0.133942	10.1544	5.24022	0.000104735	0.00155659	1.26999	wmd
FBgn0038244	0.199175	10.0526	5.23931	0.000104914	0.00155742	1.26827	CG7987
FBgn0036838	0.200353	9.89721	5.23775	0.000105224	0.00156019	1.2653	CG3808
FBgn0085313	-0.827214	9.14021	-5.23589	0.000105594	0.00156384	1.26178	CG34284
FBgn0032258	0.214367	9.84328	5.23347	0.000106078	0.00156916	1.25719	CG7456
FBgn0032388	0.210358	10.3326	5.23051	0.000106674	0.00157443	1.25156	CG6686
FBgn0037892	0.185332	9.71961	5.23046	0.000106684	0.00157443	1.25147	mRpL40
FBgn0052579	0.197995	10.3059	5.22623	0.00010754	0.00158521	1.24344	CG32579
FBgn0038415	-0.148293	7.16553	-5.22442	0.000107909	0.00158879	1.24	CG17929
FBgn0039358	0.265118	11.1434	5.22189	0.000108427	0.00159455	1.23519	CG5028
FBgn0010417	0.213748	9.68067	5.22063	0.000108686	0.00159465	1.23279	Taf6
FBgn0261560	0.49374	11.979	5.22079	0.000108654	0.00159465	1.23308	Thor
FBgn0031189	0.169535	9.45157	5.21919	0.000108982	0.00159714	1.23005	CG14618
FBgn0038056	0.353685	8.90926	5.2154	0.000109766	0.00160676	1.22286	CG5961
FBgn0004465	0.154807	10.1459	5.21285	0.000110298	0.00161268	1.218	Su(P)
FBgn0000634	0.147529	10.9222	5.20664	0.000111603	0.00162987	1.20619	Fas1
FBgn0047199	0.252185	9.36783	5.20333	0.000112304	0.00163821	1.19989	CG31517
FBgn0063493	-0.492032	9.83074	-5.2018	0.000112631	0.00164108	1.19698	GstE7
FBgn0038869	0.266711	9.71875	5.20033	0.000112944	0.00164374	1.19419	CG3353
FBgn0032210	0.17703	8.68502	5.19219	0.0001147	0.00166546	1.17869	CYLD
FBgn0035355	-0.629365	10.318	-5.1924	0.000114654	0.00166546	1.17909	CG16985
FBgn0015527	0.338464	8.97865	5.19035	0.000115101	0.0016669	1.17519	pen
FBgn0030851	0.17234	9.71088	5.19063	0.000115041	0.0016669	1.17571	CG8326
FBgn0035982	-0.599708	10.9629	-5.18992	0.000115196	0.0016669	1.17436	CG4461
FBgn0026323	0.140417	9.86094	5.1818	0.000116983	0.00169083	1.15889	Tak1
FBgn0052649	0.200376	8.95712	5.17905	0.000117595	0.00169385	1.15366	CG32649
FBgn0063499	-0.465717	8.60001	-5.17953	0.000117488	0.00169385	1.15457	GstE10
FBgn0259728	0.170114	7.98043	5.17952	0.000117491	0.00169385	1.15455	CG42382
FBgn0039870	0.172689	10.2433	5.17725	0.000117996	0.00169769	1.15023	CG1896
FBgn0035228	0.157759	11.2883	5.17068	0.000119478	0.00171705	1.1377	CG12091
FBgn0027843	-0.276947	9.89108	-5.16881	0.000119902	0.00171787	1.13414	CAH2
FBgn0040260	-1.24844	9.9732	-5.16863	0.000119943	0.00171787	1.1338	Ugt36Bc
FBgn0262508	-0.342092	8.62794	-5.16964	0.000119713	0.00171787	1.13573	CG43078
FBgn0002283	0.26144	10.6982	5.16483	0.000120812	0.0017264	1.12654	l(3)73Ah
FBgn0032124	-0.229432	7.36343	-5.16515	0.000120738	0.0017264	1.12717	CG17855
FBgn0037525	0.19147	7.47961	5.15331	0.000123485	0.0017626	1.10457	CG17816
FBgn0002579	0.103278	14.0855	5.15052	0.000124142	0.00176797	1.09924	RpL36
FBgn0040507	-0.178304	7.51561	-5.1507	0.0001241	0.00176797	1.09958	ACXD
FBgn0024945	0.157622	10.1283	5.14749	0.000124859	0.00177618	1.09346	NitFhit
FBgn0034118	0.184928	10.3934	5.14534	0.00012537	0.00178145	1.08935	Nup62
FBgn0011674	0.310027	9.40576	5.13876	0.00012695	0.00180187	1.07677	insc
FBgn0030582	0.186194	11.1063	5.13236	0.000128505	0.00182188	1.06456	CG14411
FBgn0015296	0.188978	10.0376	5.13115	0.000128802	0.00182226	1.06224	Shc
FBgn0261808	-0.228087	10.5031	-5.13107	0.00012882	0.00182226	1.06209	cu
FBgn0020304	0.363292	10.6282	5.13001	0.000129082	0.00182392	1.06005	drongo
FBgn0033739	0.23472	8.65161	5.12863	0.00012942	0.00182591	1.05743	Dyb
FBgn0053533	-0.937422	9.05237	-5.12826	0.000129512	0.00182591	1.05671	lectin-37Db
FBgn0045469	0.139835	6.74862	5.12666	0.000129907	0.00182942	1.05366	Gr93c
FBgn0028426	0.190929	9.52624	5.12448	0.000130449	0.00183299	1.04948	JhI-1
FBgn0035025	0.182836	9.59363	5.12447	0.00013045	0.00183299	1.04946	uri
FBgn0030148	-1.02762	8.70393	-5.12266	0.000130901	0.00183727	1.046	CG3106
FBgn0052264	0.197116	9.27135	5.12207	0.000131047	0.00183729	1.04488	CG32264
FBgn0038846	-0.472873	7.84091	-5.11976	0.000131625	0.00184333	1.04047	CG5697
FBgn0002569	-0.577567	9.60464	-5.11855	0.00013193	0.00184459	1.03814	LvpD
FBgn0086359	0.245905	8.28421	5.11824	0.000132007	0.00184459	1.03755	Invadolysin
FBgn0004598	0.182592	11.1646	5.11307	0.000133313	0.00186077	1.02767	Fur2
FBgn0031814	-0.325092	9.64742	-5.11247	0.000133467	0.00186087	1.02651	retm
FBgn0035807	0.220332	10.5286	5.10575	0.000135186	0.00188276	1.01365	CG7492
FBgn0036320	-0.844479	7.68636	-5.1039	0.000135665	0.00188735	1.0101	CG10943
FBgn0011241	0.172209	9.65924	5.09845	0.000137083	0.00189454	0.999666	cbx
FBgn0016059	0.193204	9.62886	5.09948	0.000136814	0.00189454	1.00164	Sema-1b
FBgn0031604	0.197775	9.75731	5.09925	0.000136873	0.00189454	1.0012	Elp3
FBgn0035793	0.189736	9.14472	5.10124	0.000136356	0.00189454	1.00501	CG7546
FBgn0038043	0.210121	11.1423	5.09885	0.000136978	0.00189454	1.00044	CG17202
FBgn0038576	0.124023	8.70089	5.10012	0.000136646	0.00189454	1.00287	Arp5
FBgn0028516	0.278622	10.3349	5.09531	0.000137906	0.00190293	0.993654	ZnT35C
FBgn0031062	0.240133	9.60933	5.09498	0.000137992	0.00190293	0.993032	CG14230
FBgn0027948	0.132234	11.7495	5.09239	0.000138677	0.0019082	0.98806	msps
FBgn0038719	-0.67917	8.50484	-5.09259	0.000138624	0.0019082	0.988444	CG16727
FBgn0035251	0.118187	10.2154	5.09041	0.000139202	0.00191334	0.984266	CG7967
FBgn0035090	-0.524385	10.1872	-5.08915	0.000139536	0.00191585	0.981857	CG2736
FBgn0030964	0.232376	10.1595	5.08269	0.000141268	0.00193542	0.969469	Pvf1
FBgn0033751	0.195948	9.57596	5.083	0.000141185	0.00193542	0.970061	CG8818
FBgn0012037	-0.66587	10.2063	-5.07987	0.00014203	0.00194201	0.964073	Ance
FBgn0034674	0.248689	9.35849	5.07977	0.000142057	0.00194201	0.963879	CG9304
FBgn0027493	0.13487	11.8911	5.07716	0.000142767	0.00194961	0.958874	CG17273
FBgn0042206	-0.275306	7.43331	-5.07341	0.000143793	0.00196149	0.951687	GstD10
FBgn0053100	0.241545	9.71809	5.07134	0.000144364	0.00196715	0.94771	4EHP
FBgn0039908	0.207962	8.3295	5.06979	0.000144794	0.00197088	0.944724	Asator
FBgn0030878	0.25188	10.2176	5.06203	0.000146955	0.00199815	0.929847	CG6769
FBgn0005619	0.229643	7.36624	5.05951	0.000147666	0.00200566	0.925001	Hdc
FBgn0038391	-0.451004	7.89931	-5.05765	0.000148193	0.00201065	0.921426	GATAe
FBgn0004045	-0.109002	14.6786	-5.05629	0.000148579	0.00201372	0.918815	Yp1
FBgn0029835	-0.249772	8.16749	-5.05544	0.00014882	0.00201482	0.917188	CG5921
FBgn0033902	0.23671	12.0463	5.05189	0.000149833	0.00202636	0.910378	Tango7
FBgn0036000	0.163475	9.07516	5.0506	0.000150203	0.00202742	0.907902	CG3434
FBgn0047135	-0.174809	12.9186	-5.0505	0.000150233	0.00202742	0.907701	CG32276
FBgn0015521	0.110703	13.7024	5.04662	0.000151352	0.00203816	0.900253	oho23B
FBgn0261064	0.211232	9.45634	5.04702	0.000151236	0.00203816	0.901024	Rbsn-5
FBgn0031832	0.155195	9.57701	5.04482	0.000151876	0.00204304	0.896785	CG9596
FBgn0032259	0.207011	9.62573	5.03998	0.000153289	0.00205863	0.887486	CG6144
FBgn0039640	0.211391	11.5449	5.03973	0.000153361	0.00205863	0.887016	CG14516
FBgn0036302	0.127889	7.66837	5.03467	0.000154855	0.00207647	0.877284	sowah
FBgn0052626	0.145176	7.96431	5.02917	0.000156495	0.00209623	0.866711	CG32626
FBgn0037445	0.30386	8.17704	5.02793	0.00015687	0.00209903	0.86431	CG9727
FBgn0085378	0.238852	9.24344	5.02388	0.000158091	0.00211313	0.856526	CG34349
FBgn0037297	0.1448	9.3506	5.02305	0.000158341	0.00211423	0.854937	CG1116
FBgn0051619	0.17657	7.20705	5.02188	0.000158698	0.00211676	0.852679	CG31619
FBgn0040099	0.55438	7.70672	5.02034	0.000159166	0.00211851	0.849726	lectin-28C
FBgn0261641	0.215977	7.87435	5.02069	0.00015906	0.00211851	0.850392	CG42724
FBgn0038550	0.257749	7.86561	5.01481	0.000160864	0.00213886	0.839073	CG17801
FBgn0030858	0.161897	9.71623	5.01311	0.000161388	0.00214357	0.835809	CG8211
FBgn0024995	-0.619759	8.1857	-5.00612	0.000163568	0.00216569	0.822344	CG2680
FBgn0032211	-0.28267	7.06498	-5.00675	0.00016337	0.00216569	0.823561	CG13138
FBgn0035976	0.358315	9.31106	5.00623	0.000163532	0.00216569	0.822561	PGRP-LC
FBgn0028983	-0.462421	9.49508	-5.00179	0.000164932	0.00218146	0.814008	Spn6
FBgn0034528	0.188431	9.81309	5.00079	0.000165248	0.00218335	0.812086	CG11180
FBgn0033178	0.193236	9.02947	4.99745	0.000166314	0.00219513	0.805635	CG11127
FBgn0033216	-0.543294	8.00748	-4.99584	0.000166828	0.00219834	0.802539	CG1946
FBgn0037714	-0.661853	9.40958	-4.9956	0.000166905	0.00219834	0.802075	CG9396
FBgn0003204	0.161853	11.828	4.99405	0.000167403	0.00220169	0.799082	ras
FBgn0032452	0.168851	7.5157	4.99372	0.000167508	0.00220169	0.798452	CG15484
FBgn0033458	0.329552	11.5091	4.99264	0.000167858	0.00220398	0.796362	CG18446
FBgn0035243	0.144947	9.40708	4.99045	0.000168564	0.00221095	0.792149	CG13926
FBgn0028734	0.207184	8.65208	4.98403	0.000170654	0.00223373	0.779779	Fmr1
FBgn0036324	0.182637	7.63871	4.98405	0.000170649	0.00223373	0.779811	CG12520
FBgn0033351	0.158745	10.8281	4.98074	0.000171739	0.0022456	0.773419	CG8235
FBgn0041342	0.273681	9.93187	4.9793	0.000172214	0.00224948	0.77065	Cct1
FBgn0005427	0.165059	8.53205	4.97839	0.000172515	0.00225109	0.768895	ewg
FBgn0026713	0.188876	8.84478	4.97671	0.000173074	0.00225605	0.765649	l(1)G0007
FBgn0086904	0.125591	13.646	4.97493	0.000173668	0.00226144	0.762215	Nacalpha
FBgn0034270	0.213594	9.24142	4.96648	0.000176512	0.00229611	0.745915	CG6401
FBgn0011642	0.22613	10.3847	4.96509	0.000176986	0.00229754	0.743222	Zyx102EF
FBgn0040342	-0.570227	8.60047	-4.96539	0.000176882	0.00229754	0.743813	CG3706
FBgn0038135	-0.817441	9.97032	-4.96309	0.000177668	0.00230402	0.739365	CG8773
FBgn0000038	0.220694	7.37222	4.95954	0.000178885	0.00231453	0.732515	nAcRbeta-64B
FBgn0019637	0.145972	9.04007	4.95912	0.000179029	0.00231453	0.731708	Atu
FBgn0023520	0.165392	8.14144	4.95973	0.000178819	0.00231453	0.732885	CG3857
FBgn0035673	-0.514377	8.08726	-4.95784	0.000179471	0.00231788	0.729231	CG6602
FBgn0037765	-0.401459	9.16699	-4.95242	0.000181352	0.00233978	0.71877	CG9458
FBgn0052115	-0.298767	7.39932	-4.94345	0.000184513	0.00237813	0.701432	CG32115
FBgn0032587	0.223897	9.63465	4.94023	0.000185663	0.00239051	0.6952	CG5953
FBgn0037741	0.137889	8.40297	4.93716	0.000186766	0.00240225	0.689258	CG16908
FBgn0030300	-0.26952	7.92705	-4.93656	0.000186982	0.00240259	0.688098	Sk1
FBgn0031373	-0.413128	8.24796	-4.93588	0.000187224	0.00240325	0.686801	CG15358
FBgn0000346	0.178975	9.33927	4.93278	0.000188347	0.0024117	0.680799	comt
FBgn0004575	0.263985	8.11659	4.93248	0.000188456	0.0024117	0.680221	Syn
FBgn0032656	-0.238472	10.281	-4.93302	0.000188259	0.0024117	0.681268	CG5674
FBgn0031245	-0.635926	10.5986	-4.93148	0.00018882	0.00241392	0.678283	CG3625
FBgn0039086	-0.222703	7.46222	-4.92845	0.000189926	0.00242559	0.672427	CG16732
FBgn0036500	0.171371	10.0231	4.92733	0.000190336	0.00242837	0.670263	CG7275
FBgn0036752	-0.496326	9.80558	-4.92341	0.000191783	0.00244436	0.662666	Adgf-A
FBgn0015393	0.142482	12.8799	4.92211	0.000192262	0.00244553	0.660161	hoip
FBgn0046689	-0.388424	7.43953	-4.92214	0.000192254	0.00244553	0.660205	Takl1
FBgn0036511	0.139771	9.20653	4.91832	0.000193675	0.00246102	0.652814	CG6498
FBgn0051041	-0.940986	8.00317	-4.91759	0.000193946	0.00246198	0.651414	CG31041
FBgn0086451	0.24404	10.6287	4.91609	0.00019451	0.00246666	0.648501	l(2)k09022
FBgn0033649	0.199637	7.81519	4.91221	0.000195971	0.00247757	0.640994	pyr
FBgn0037504	0.155453	9.64601	4.91229	0.000195941	0.00247757	0.641147	CG1142
FBgn0038277	0.1462	13.9822	4.91172	0.000196155	0.00247757	0.64005	RpS5b
FBgn0259144	0.245987	9.2551	4.91248	0.000195868	0.00247757	0.641519	CG42259
FBgn0052023	-0.621811	9.29409	-4.90603	0.000198324	0.00249995	0.629022	CG32023
FBgn0052675	0.214546	9.87178	4.90618	0.000198266	0.00249995	0.629313	Tango5
FBgn0032900	-0.291591	8.25511	-4.90522	0.000198635	0.00250137	0.627452	CG14401
FBgn0032048	0.250411	7.5464	4.90466	0.000198851	0.00250159	0.626361	Dh31
FBgn0015278	0.145538	8.78029	4.90345	0.000199313	0.00250492	0.62403	Pi3K68D
FBgn0034485	0.220389	7.37435	4.89515	0.000202536	0.00254289	0.607939	CG11099
FBgn0003520	0.182267	10.4043	4.8935	0.000203183	0.00254847	0.604742	stau
FBgn0031078	0.182502	10.2183	4.88853	0.000205146	0.00257054	0.595099	CG11943
FBgn0037363	0.305103	8.35235	4.88523	0.000206458	0.00258441	0.588706	CG1347
FBgn0019938	0.241972	11.0403	4.88428	0.000206838	0.0025866	0.586861	RpI1
FBgn0000139	0.151352	9.85092	4.87877	0.000209054	0.00260656	0.576173	ash2
FBgn0037087	0.158765	11.1234	4.87955	0.000208738	0.00260656	0.57769	CG7519
FBgn0037898	0.222258	8.69858	4.87927	0.000208851	0.00260656	0.577147	CG18643
FBgn0051974	-0.785803	10.0035	-4.8747	0.000210704	0.00262454	0.56829	CG31974
FBgn0004370	0.23113	8.78537	4.87359	0.000211156	0.00262759	0.566137	Ptp10D
FBgn0052537	0.212465	8.11077	4.87092	0.00021225	0.00263859	0.560957	CG32537
FBgn0035907	0.15185	10.3467	4.86948	0.000212845	0.00264339	0.558147	CG6662
FBgn0037900	0.123191	9.64734	4.86171	0.00021607	0.00268079	0.54307	CG5276
FBgn0000320	0.352222	8.25353	4.85835	0.000217481	0.00269566	0.536539	eya
FBgn0029711	0.111411	8.39439	4.85594	0.000218497	0.00270559	0.531868	Usf
FBgn0030850	0.133979	11.3423	4.85469	0.000219027	0.00270684	0.529439	CG8408
FBgn0034295	-0.71533	12.4007	-4.85515	0.000218831	0.00270684	0.530334	CG10911
FBgn0053126	-0.532983	11.1321	-4.85349	0.000219537	0.00271049	0.527106	NLaz
FBgn0033972	0.164288	10.2718	4.84993	0.000221055	0.00272656	0.520198	Ciao1
FBgn0033792	-0.654223	8.11811	-4.84901	0.000221453	0.0027288	0.518392	CG13325
FBgn0037901	0.17658	9.68313	4.84777	0.000221983	0.00273267	0.515995	CG6744
FBgn0000472	0.247953	11.234	4.84467	0.000223322	0.00274647	0.509964	dm
FBgn0051451	0.468161	10.6692	4.84291	0.000224083	0.00275315	0.506553	CG31451
FBgn0016041	0.158716	11.522	4.8414	0.000224741	0.00275855	0.503613	Tom40
FBgn0038318	0.129867	9.22106	4.83978	0.000225447	0.00276452	0.500467	CG6236
FBgn0037754	0.314992	7.42097	4.83888	0.000225844	0.00276669	0.498706	CG8500
FBgn0030648	0.122843	7.59695	4.83694	0.000226695	0.00277443	0.494933	CG6340
FBgn0000116	-0.19805	12.5369	-4.83054	0.000229527	0.00280637	0.482487	Argk
FBgn0033672	0.154389	9.72506	4.82956	0.00022996	0.00280894	0.480597	rho-7
FBgn0003866	0.21732	7.99577	4.82904	0.000230192	0.00280906	0.479585	tsh
FBgn0031495	0.151382	9.33719	4.82622	0.000231457	0.00281669	0.474093	GABPI
FBgn0035438	-0.152148	12.0857	-4.82696	0.000231122	0.00281669	0.475541	PHGPx
FBgn0039802	0.148588	10.3483	4.82615	0.000231488	0.00281669	0.473958	dj-1beta
FBgn0040609	-0.481012	10.0327	-4.82517	0.000231931	0.00281937	0.472041	CG3348
FBgn0001332	0.192034	11.7517	4.82322	0.000232806	0.00282728	0.468264	L
FBgn0000543	0.141643	9.23446	4.81818	0.000235098	0.00285237	0.458442	ecd
FBgn0041712	-0.564188	9.27379	-4.81663	0.000235805	0.0028582	0.455434	yellow-d
FBgn0039207	0.206317	10.0339	4.81399	0.000237016	0.00286737	0.450299	CG5789
FBgn0040777	0.12592	11.3056	4.81448	0.000236791	0.00286737	0.451248	CG14767
FBgn0031515	-0.307439	7.5271	-4.81264	0.000237639	0.00287216	0.447664	CG9664
FBgn0028737	0.116027	13.7923	4.81106	0.000238371	0.00287825	0.444582	Ef1beta
FBgn0037150	0.234892	9.69062	4.80998	0.00023887	0.00288151	0.442487	CG7133
FBgn0031834	0.256682	8.94344	4.80815	0.000239723	0.00288904	0.438913	CG13766
FBgn0022361	0.19746	9.79137	4.80553	0.000240942	0.00290097	0.433826	Pur-alpha
FBgn0032246	0.124947	11.3059	4.80254	0.000242349	0.00291247	0.42799	CG5168
FBgn0038966	0.153769	9.32777	4.80252	0.000242359	0.00291247	0.427947	pinta
FBgn0024947	-0.262266	11.6815	-4.8019	0.00024265	0.00291279	0.426747	NTPase
FBgn0051357	0.17525	9.68514	4.80148	0.000242848	0.00291279	0.425931	CG31357
FBgn0013325	0.110069	14.0803	4.79765	0.000244664	0.00293179	0.418461	RpL11
FBgn0054043	-0.742529	8.38931	-4.79189	0.000247416	0.00296195	0.40725	CG34043
FBgn0036066	-0.230291	7.13969	-4.79086	0.000247911	0.00296225	0.405246	CG14160
FBgn0039748	0.260381	7.78492	4.79105	0.000247819	0.00296225	0.405617	CG15529
FBgn0036773	0.206929	9.01697	4.78997	0.000248344	0.00296463	0.403495	CG13698
FBgn0033047	-0.697677	8.22912	-4.78889	0.000248867	0.00296805	0.401388	CG7882
FBgn0030747	-0.388601	8.0968	-4.78438	0.000251056	0.00299133	0.392611	CG4301
FBgn0050443	0.185924	9.54802	4.7799	0.000253255	0.00301395	0.38387	Opbp
FBgn0051686	-0.384437	7.18332	-4.77954	0.000253431	0.00301395	0.383171	CG31686
FBgn0036686	0.16837	9.71739	4.77865	0.000253873	0.00301635	0.381428	CG7728
FBgn0003715	-0.332894	7.12971	-4.7778	0.000254291	0.00301848	0.379777	CG16778
FBgn0023512	0.172352	10.5301	4.77235	0.000257006	0.00304742	0.369134	eIF2B-epsilon
FBgn0036460	0.208122	11.0428	4.77193	0.000257212	0.00304742	0.368332	CG5114
FBgn0085432	0.173381	7.46265	4.76924	0.000258565	0.00306058	0.363071	pan
FBgn0039054	0.168408	7.43733	4.76864	0.000258865	0.00306125	0.361912	CG13830
FBgn0003248	0.349631	8.0156	4.76682	0.000259783	0.00306924	0.358362	Rh2
FBgn0037906	-0.347523	7.70687	-4.76465	0.000260887	0.0030794	0.354112	PGRP-LB
FBgn0032387	-0.825027	8.34815	-4.76218	0.000262143	0.00309132	0.349301	CG16965
FBgn0003751	0.267859	8.56774	4.76159	0.000262444	0.00309199	0.348148	trk
FBgn0030827	-0.173639	7.01121	-4.7582	0.000264183	0.00310644	0.341532	CG18258
FBgn0261593	0.113831	14.1565	4.75776	0.000264409	0.00310644	0.340674	RpS10b
FBgn0036857	-0.402925	8.48515	-4.75811	0.00026423	0.00310644	0.341355	CG9629
FBgn0035765	0.178566	11.3518	4.75678	0.000264917	0.00310951	0.338751	CG8600
FBgn0001139	0.193936	8.86647	4.75401	0.000266348	0.00311837	0.333352	gro
FBgn0002872	0.182663	9.12707	4.75481	0.000265932	0.00311837	0.334918	mu2
FBgn0027453	0.137114	9.34113	4.75341	0.000266661	0.00311837	0.332177	Dnz1
FBgn0027599	0.161542	9.83426	4.75367	0.000266528	0.00311837	0.332676	CG2790
FBgn0029603	0.165789	7.88002	4.7472	0.000269908	0.00315342	0.32005	CG14053
FBgn0051106	-0.52459	8.4222	-4.74521	0.00027096	0.00316278	0.316151	CG31106
FBgn0005563	0.236375	7.79944	4.74274	0.000272267	0.0031751	0.311329	cac
FBgn0033485	0.207066	10.7286	4.74215	0.000272579	0.00317567	0.310179	RpLP0-like
FBgn0036738	-0.708336	11.1393	-4.7417	0.000272819	0.00317567	0.309299	CG7542
FBgn0019686	0.187971	12.3352	4.74088	0.000273256	0.00317783	0.307697	lok
FBgn0033347	0.187053	7.12684	4.73952	0.000273979	0.00318331	0.305047	CG8248
FBgn0262599	0.212136	6.9926	4.73648	0.000275612	0.00319933	0.299092	CG43129
FBgn0004087	0.144523	10.9667	4.73552	0.000276128	0.00320237	0.297221	Dhfr
FBgn0261789	0.140283	11.8132	4.7333	0.000277324	0.00321329	0.292889	SmD2
FBgn0003353	0.236003	8.29429	4.73155	0.000278274	0.00321921	0.289461	sei
FBgn0028544	-0.430114	6.93456	-4.73142	0.000278345	0.00321921	0.289207	CG16884
FBgn0050392	-0.181022	10.346	-4.72838	0.00028	0.00323539	0.283266	CG30392
FBgn0027571	-0.216388	13.2968	-4.72602	0.000281294	0.00324518	0.27865	CG3523
FBgn0034743	0.0934291	14.124	4.7259	0.000281362	0.00324518	0.278407	RpS16
FBgn0015568	0.418129	10.014	4.72375	0.000282545	0.00325356	0.274202	alpha-Est1
FBgn0034197	-0.170596	7.38474	-4.72364	0.000282604	0.00325356	0.273992	Cda9
FBgn0039274	0.164049	10.5675	4.7174	0.00028607	0.00329046	0.26178	CG11920
FBgn0031485	0.218855	9.43574	4.71652	0.00028656	0.0032931	0.260065	CG9643
FBgn0010504	-0.179496	9.90537	-4.71592	0.000286894	0.00329393	0.258898	kermit
FBgn0020623	0.195366	7.96947	4.71363	0.000288182	0.00330271	0.254412	Pal
FBgn0037255	0.172955	9.40348	4.7139	0.000288031	0.00330271	0.254937	Fip1
FBgn0038146	0.184706	10.1101	4.71083	0.00028976	0.00331778	0.248942	CG9799
FBgn0033529	0.157614	11.1678	4.70552	0.000292784	0.00334936	0.238541	CG17765
FBgn0004463	0.146667	9.02303	4.7032	0.000294112	0.00335727	0.234009	RpIII128
FBgn0035830	0.18649	10.2308	4.70292	0.000294273	0.00335727	0.233459	CG8209
FBgn0038586	0.169592	8.32257	4.70335	0.00029403	0.00335727	0.234287	CG7168
FBgn0004117	0.497852	10.2873	4.69365	0.000299657	0.0034156	0.215299	Tm2
FBgn0029172	-0.470009	11.4611	-4.69276	0.000300179	0.00341846	0.213556	Fad2
FBgn0033423	-0.58795	8.89093	-4.6851	0.000304708	0.00346691	0.198557	CG1809
FBgn0036569	0.164291	8.98957	4.68325	0.000305812	0.00347634	0.194933	CG5414
FBgn0051721	-0.190825	7.36858	-4.68253	0.000306248	0.00347816	0.193507	Trim9
FBgn0023197	-0.754826	12.5754	-4.67883	0.000308475	0.0035003	0.186252	Jon74E
FBgn0037561	0.238642	8.69698	4.67747	0.000309293	0.00350643	0.183601	CG9630
FBgn0031069	-0.35014	11.3895	-4.67673	0.00030974	0.00350738	0.182152	CG12703
FBgn0032652	0.764021	9.77074	4.67642	0.000309932	0.00350738	0.181531	CG6870
FBgn0035888	0.222368	8.3372	4.67491	0.000310846	0.00351456	0.178584	CG7120
FBgn0035064	0.135723	8.83189	4.6732	0.00031189	0.00352321	0.175226	CG16912
FBgn0036774	0.181726	10.4358	4.6708	0.00031336	0.00353665	0.170517	mRpS26
FBgn0002938	0.220823	7.89242	4.66805	0.00031505	0.00354938	0.16513	ninaC
FBgn0033928	0.176381	8.11237	4.66805	0.00031505	0.00354938	0.165129	Arc2
FBgn0004867	0.0927779	14.0816	4.66672	0.000315872	0.00355546	0.16252	sop
FBgn0035374	0.154503	10.5064	4.66608	0.00031627	0.00355677	0.16126	mRpS35
FBgn0014022	0.151769	9.01911	4.66324	0.000318032	0.0035734	0.155696	Rlb1
FBgn0002780	0.106673	13.3981	4.66071	0.000319615	0.0035848	0.150724	mod
FBgn0260944	0.109439	8.17974	4.66095	0.000319465	0.0035848	0.151193	Rbp1
FBgn0040780	0.165468	8.23326	4.65841	0.000321059	0.0035978	0.146211	CG12821
FBgn0034962	0.154965	10.9452	4.65778	0.000321451	0.003599	0.144987	MAN1
FBgn0028946	-0.197025	6.71965	-4.65707	0.0003219	0.00360082	0.143592	Or35a
FBgn0010620	0.175202	10.5349	4.65329	0.000324297	0.00362443	0.136162	Sip1
FBgn0029801	0.23597	9.87655	4.65233	0.000324907	0.00362803	0.134281	CG15771
FBgn0035403	0.147088	9.34451	4.64832	0.00032747	0.00365342	0.126413	CG14956
FBgn0028932	0.118624	8.27998	4.64693	0.000328363	0.00365369	0.123686	CG16890
FBgn0033761	0.122052	10.4688	4.64722	0.000328175	0.00365369	0.124259	CG8778
FBgn0038400	0.145897	11.7173	4.64694	0.000328353	0.00365369	0.123716	CG5903
FBgn0038613	-0.377947	7.75798	-4.64458	0.000329879	0.00366733	0.119074	Vha100-4
FBgn0000377	0.15491	9.77057	4.64277	0.000331055	0.00367069	0.115512	crn
FBgn0010609	-0.260721	10.0197	-4.64321	0.000330767	0.00367069	0.116383	Acsl
FBgn0033557	0.180789	8.77099	4.64283	0.000331014	0.00367069	0.115636	CG12325
FBgn0029672	0.146834	10.3916	4.63997	0.000332877	0.00368766	0.110016	CG2875
FBgn0002609	0.541565	8.76395	4.63894	0.000333551	0.00369188	0.107992	HLHm3
FBgn0031732	-0.294146	8.42831	-4.63726	0.00033465	0.00369835	0.104699	CG11149
FBgn0039406	0.153786	12.7797	4.63715	0.000334721	0.00369835	0.104485	RpL34a
FBgn0001296	0.400252	10.7776	4.63578	0.000335619	0.00370503	0.101802	kar
FBgn0004430	-0.284579	8.09433	-4.63448	0.000336481	0.00370535	0.0992351	LysS
FBgn0261284	0.306906	9.31322	4.63376	0.000336956	0.00370535	0.0978224	bou
FBgn0030407	0.169903	8.16693	4.63351	0.000337117	0.00370535	0.0973446	CG2543
FBgn0030802	0.120136	11.0797	4.6338	0.000336928	0.00370535	0.0979051	CG9099
FBgn0052278	0.193412	10.9643	4.63504	0.000336112	0.00370535	0.100332	CG32278
FBgn0035423	0.105535	12.8514	4.62576	0.000342284	0.00375887	0.082117	CG17737
FBgn0038038	-0.329884	10.1172	-4.62496	0.000342827	0.00376156	0.0805295	CG5167
FBgn0029174	0.153258	11.8925	4.62091	0.000345564	0.00378829	0.0725711	FKBP59
FBgn0036578	0.180418	10.9757	4.61973	0.000346362	0.00379375	0.0702606	CG5018
FBgn0037299	0.17272	9.39866	4.61682	0.000348349	0.00381191	0.0645345	CG1115
FBgn0051259	-0.444496	8.21242	-4.61641	0.000348625	0.00381191	0.0637428	CG31259
FBgn0016701	0.163765	11.2421	4.61467	0.000349822	0.00381924	0.0603111	Rab4
FBgn0020618	0.0956093	13.9463	4.61433	0.000350058	0.00381924	0.0596357	Rack1
FBgn0037652	0.142175	10.8755	4.61398	0.000350298	0.00381924	0.0589505	CG11980
FBgn0053099	-0.296158	8.23223	-4.61367	0.000350506	0.00381924	0.0583559	CG33099
FBgn0037275	0.126305	7.57097	4.61269	0.000351184	0.00382332	0.0564228	CG14655
FBgn0004169	0.44311	9.51853	4.61115	0.000352247	0.0038316	0.053395	up
FBgn0032986	0.160794	10.4734	4.60943	0.000353437	0.00384123	0.0500199	CG3262
FBgn0003891	0.191148	10.5529	4.60537	0.00035627	0.00386635	0.0420294	tud
FBgn0024194	0.143035	10.0229	4.60524	0.000356361	0.00386635	0.0417744	rasp
FBgn0037764	-0.336997	8.47954	-4.60265	0.000358179	0.00388274	0.0366803	CG9459
FBgn0038771	0.138927	10.702	4.59794	0.000361509	0.00391547	0.0274196	CG4390
FBgn0017581	0.227587	12.0136	4.59685	0.000362288	0.00392054	0.0252648	Lk6
FBgn0010280	0.150263	9.3408	4.59281	0.000365176	0.00394502	0.0173187	Taf4
FBgn0034729	0.208266	9.18115	4.59321	0.000364889	0.00394502	0.0181058	CG10344
FBgn0030852	0.488536	8.27117	4.59135	0.000366225	0.00395297	0.014448	CG8316
FBgn0038371	0.14917	7.672	4.58969	0.000367424	0.00396253	0.0111762	Pbp45
FBgn0032088	-0.723616	9.51151	-4.5886	0.00036821	0.00396761	0.00903883	CG13102
FBgn0033639	0.164477	9.58405	4.58634	0.000369853	0.00397852	0.0045832	CG9003
FBgn0050277	-0.483942	8.21102	-4.58659	0.000369671	0.00397852	0.00507386	Oatp58Da
FBgn0039840	-0.185964	7.54557	-4.5854	0.000370535	0.00398246	0.00273955	CG11340
FBgn0011297	0.125873	8.92247	4.5843	0.000371343	0.00398436	0.000558951	l(2)not
FBgn0035235	0.166447	8.02774	4.58449	0.000371199	0.00398436	0.000946683	CG7879
FBgn0031945	0.283718	7.66566	4.58274	0.000372483	0.00399215	-0.00250738	CG7191
FBgn0042102	-0.353927	7.89123	-4.58244	0.000372702	0.00399215	-0.0030962	CG18745
FBgn0031188	0.167234	10.1159	4.58129	0.000373544	0.00399438	-0.00535344	CG14613
FBgn0038809	0.138559	11.3054	4.58134	0.00037351	0.00399438	-0.00526392	CG16953
FBgn0024238	-0.213338	10.6137	-4.57919	0.000375094	0.00400756	-0.00949786	Fim
FBgn0039085	-0.347439	7.92419	-4.57496	0.000378226	0.00403761	-0.0178189	CG10170
FBgn0003527	0.169011	9.2877	4.57219	0.000380294	0.00404599	-0.0232748	stil
FBgn0036770	-0.180722	9.69645	-4.57234	0.000380182	0.00404599	-0.022979	Prestin
FBgn0037610	0.170894	9.57105	4.57267	0.000379937	0.00404599	-0.0223347	CG8043
FBgn0260743	0.175938	10.8387	4.57259	0.000379998	0.00404599	-0.0224957	CG18347
FBgn0010750	0.206693	9.65817	4.57015	0.000381825	0.00405886	-0.0272945	atms
FBgn0034084	0.182887	9.34335	4.56921	0.000382533	0.00406296	-0.0291486	CG8435
FBgn0030984	-0.19324	8.09959	-4.56735	0.000383939	0.00407447	-0.0328198	tgy
FBgn0039486	-0.48922	8.46491	-4.56672	0.000384413	0.00407607	-0.0340551	CG6074
FBgn0003366	0.224724	7.73068	4.56574	0.000385155	0.00407983	-0.035983	sev
FBgn0028525	0.244657	10.1126	4.56501	0.000385713	0.00407983	-0.0374314	c(2)M
FBgn0260499	0.165003	7.53458	4.56497	0.000385738	0.00407983	-0.0374958	qvr
FBgn0039711	0.198362	9.54694	4.56323	0.000387065	0.00409044	-0.0409332	CG7824
FBgn0039311	-0.945782	10.3536	-4.5605	0.000389149	0.00410903	-0.0463059	CG10513
FBgn0038257	-0.73006	8.00147	-4.55922	0.000390135	0.00411599	-0.048838	smp-30
FBgn0029507	-0.574616	10.1416	-4.55765	0.000391343	0.00412529	-0.0519302	Tsp42Ed
FBgn0031093	0.13317	9.14287	4.55667	0.000392102	0.00412984	-0.0538692	CG9581
FBgn0003310	0.162381	9.83228	4.5545	0.000393776	0.0041381	-0.05813	S
FBgn0028402	0.16938	9.65362	4.55447	0.000393802	0.0041381	-0.0581975	Sin
FBgn0085359	-0.68192	11.3626	-4.55438	0.000393871	0.0041381	-0.0583708	CG34330
FBgn0261602	0.0909069	14.3013	4.55373	0.000394374	0.00413994	-0.059648	RpL8
FBgn0033659	-1.2328	9.42184	-4.55308	0.000394879	0.0041418	-0.0609284	Damm
FBgn0032679	0.221361	10.6767	4.55152	0.000396097	0.00415113	-0.0640112	bsf
FBgn0051221	0.194581	8.04898	4.54917	0.000397939	0.00416697	-0.0686523	CG31221
FBgn0024986	-0.194032	9.12575	-4.54844	0.000398513	0.00416951	-0.0700927	CG3719
FBgn0039561	0.227487	10.2456	4.54751	0.000399242	0.00417369	-0.0719227	mfrn
FBgn0037517	-0.433105	8.41603	-4.54703	0.000399622	0.0041742	-0.0728739	CG10086
FBgn0034670	-0.304027	7.20207	-4.54601	0.000400426	0.00417914	-0.0748841	CG13488
FBgn0031106	0.179474	9.51535	4.54353	0.000402382	0.00419608	-0.0797594	Syx16
FBgn0038700	-0.769079	9.34239	-4.53997	0.000405219	0.00422218	-0.0867868	CG3734
FBgn0053181	-0.122228	10.0474	-4.53867	0.00040626	0.00422953	-0.0893538	CG33181
FBgn0034793	0.17271	9.91677	4.53795	0.00040684	0.00423207	-0.0907798	asrij
FBgn0036463	-0.152998	7.44108	-4.53611	0.000408317	0.00424394	-0.0944054	Reck
FBgn0029937	0.15746	8.40492	4.53546	0.00040884	0.00424588	-0.095686	CG8300
FBgn0039026	0.186054	8.15813	4.53331	0.000410576	0.0042604	-0.0999235	CG7029
FBgn0031040	0.254606	10.8113	4.53085	0.000412575	0.00427763	-0.104782	CG14210
FBgn0038924	-0.232313	10.8358	-4.52876	0.00041428	0.00429178	-0.108906	CG6028
FBgn0030892	0.120534	9.78069	4.52647	0.000416157	0.00430768	-0.113427	CG7206
FBgn0260477	-0.142663	7.16644	-4.52371	0.000418429	0.00432765	-0.118873	CG30283
FBgn0069056	-0.142663	7.16644	-4.52371	0.000418429	0.00432765	-0.118873	CG33226
FBgn0083940	0.124812	6.93076	4.5224	0.000419509	0.00433527	-0.121452	CG34104
FBgn0040346	0.17735	10.6021	4.52173	0.000420067	0.00433748	-0.122781	CG3704
FBgn0030334	0.239619	7.36782	4.52119	0.000420516	0.00433857	-0.123849	Karl
FBgn0024846	0.124602	10.6161	4.51696	0.000424044	0.00437139	-0.132204	p38b
FBgn0030521	-0.208572	12.4481	-4.51453	0.000426084	0.00438884	-0.137004	CG10992
FBgn0086346	0.181736	10.0219	4.51388	0.000426631	0.00439089	-0.138288	ALiX
FBgn0032681	0.290673	8.48954	4.51176	0.000428418	0.00440569	-0.142468	CG10283
FBgn0032666	0.276908	7.97829	4.50485	0.000434309	0.00445904	-0.156125	CG5758
FBgn0037750	-0.272235	7.98085	-4.50484	0.000434313	0.00445904	-0.156133	Whamy
FBgn0035470	0.178551	8.32989	4.49859	0.00043971	0.00451078	-0.168482	CG14980
FBgn0034151	-0.26373	7.7802	-4.4972	0.000440917	0.00451655	-0.171225	CG15617
FBgn0086656	0.149176	11.4109	4.49712	0.000440988	0.00451655	-0.171385	shrb
FBgn0038984	-0.333216	11.4097	-4.49642	0.000441602	0.00451917	-0.172776	CG5315
FBgn0034959	0.346163	9.10279	4.49489	0.000442937	0.00452916	-0.175794	CG11388
FBgn0031663	0.208697	10.1514	4.49362	0.000444054	0.0045355	-0.178311	CG8891
FBgn0083077	0.122488	7.6131	4.49295	0.000444636	0.0045355	-0.179622	mld
FBgn0083969	0.181824	9.30096	4.49324	0.000444385	0.0045355	-0.179058	CG34133
FBgn0020497	0.146595	10.7152	4.49191	0.000445558	0.00454124	-0.181693	emb
FBgn0032646	0.132256	9.92667	4.48909	0.000448043	0.00456287	-0.187253	CG6412
FBgn0003997	0.273025	8.25233	4.48441	0.000452211	0.00460161	-0.19651	W
FBgn0004873	0.119456	8.39492	4.48045	0.000455769	0.00463408	-0.204346	hts
FBgn0031034	-0.384664	7.97435	-4.47957	0.000456563	0.00463842	-0.206087	CG14205
FBgn0038269	0.166898	9.771	4.47866	0.000457381	0.00464299	-0.207876	Rrp6
FBgn0031384	0.187672	8.14431	4.47573	0.00046004	0.00466622	-0.21367	CG4238
FBgn0034552	-0.270272	7.89584	-4.4725	0.000462991	0.00469238	-0.220062	CG17999
FBgn0004516	0.425466	8.75856	4.47151	0.000463896	0.00469778	-0.222014	Gad1
FBgn0039787	-0.459379	8.0252	-4.46758	0.000467522	0.00473071	-0.229798	CG9702
FBgn0000064	-0.326773	11.5057	-4.4659	0.000469079	0.00473886	-0.233121	Ald
FBgn0002940	0.378413	12.742	4.46615	0.000468846	0.00473886	-0.232624	ninaE
FBgn0025674	0.247517	10.6403	4.46479	0.000470113	0.00474551	-0.235323	CycK
[truncated: 11,148 more rows]

## Sheet: foxo Gene Expression
ID	logFC	AveExpr	t	P.Value	adj.P.Val	B	symbol
[truncated: 12,400 more rows]
